# Supplementary material for: Rhodium-catalyzed asymmetric synthesis of β-branched esters from allylic amines
Source: Royal Society of Chemistry journal article supplement (doi:10.1039/c8cc02612b), 2018-01-01

Supporting Information for:

**Rhodium-Catalyzed Asymmetric Synthesis of  $\beta$ -Branched Esters from Allylic Amines**

Summer D. Laffoon, Zhao Wu, and Kami L. Hull\*

*Department of Chemistry, University of Illinois at Urbana-Champaign, 600 South Mathews Avenue, Urbana,  
Illinois 61801, United States*

Table of Contents

|                                                                 |     |
|-----------------------------------------------------------------|-----|
| A. General Information.....                                     | S2  |
| B. Select Optimization Results.....                             | S4  |
| C. Experimental Procedure, Isolation, and Characterization..... | S7  |
| D. HPLC Traces of Isolated Esters.....                          | S22 |
| E. Allylic Amine Synthesis and Characterization.....            | S46 |
| F. References.....                                              | S54 |
| G. Spectral Data.....                                           | S55 |

## A. General Information

**General Experimental Procedures:** All reactions were carried out in flame-dried (or oven-dried at 140 °C for at least 2 h) glassware under an atmosphere of nitrogen unless otherwise indicated. Nitrogen was dried using a drying tube equipped with Drierite™ unless otherwise noted. Air- and moisture-sensitive reagents were handled in a nitrogen-filled glovebox (working oxygen level ~ 0.1 ppm; working water level ~ 0.1 ppm). Column chromatography was performed with silica gel from Grace Davison Discovery Sciences (35-75 μm) with a column mixed as a slurry with the eluent and was packed, rinsed, and run under air pressure. Analytical thin-layer chromatography (TLC) was performed on precoated glass silica gel plates (by EMD Chemicals Inc.) with F-254 indicator. Visualization was either by short wave (254 nm) ultraviolet light, or by staining with potassium permanganate followed by brief heating on a hot plate or by a heat gun. Distillations were performed using a 3 cm shortpath column under reduced pressure or by using a Hickman still at ambient pressure.

**Instrumentation:** <sup>1</sup>H NMR and <sup>13</sup>C NMR were recorded on a Varian Unity 400/500 MHz (100/125 MHz respectively for <sup>13</sup>C) spectrometer, a VXR-500 MHz spectrometer, or a Bruker 500 MHz spectrometer equipped with a CryoProbe. Spectra were referenced using either CDCl<sub>3</sub> as solvent (unless otherwise noted) with the residual solvent peak as the internal standard (<sup>1</sup>H NMR: δ 7.26 ppm, <sup>13</sup>C NMR: δ 77.16 ppm for CDCl<sub>3</sub>). Chemical shifts were reported in parts per million and multiplicities are as indicated: s (singlet,) d (doublet,) t (triplet,) q (quartet,) p (pentet,) m (multiplet,) and br (broad). Coupling constants, *J*, are reported in Hertz and integration is provided, along with assignments, as indicated. Analysis by Gas Chromatography-Mass Spectrometry (GC-MS) was performed using a Shimadzu GC-2010 Plus Gas chromatograph fitted with a Shimadzu GCMS-QP2010 SE mass spectrometer using electron impact (EI) ionization after analytes traveled through a SHRXI-5MS- 30m x 0.25 mm x 0.25 μm column using a helium carrier gas. Data are reported in the form of *m/z* (intensity relative to base peak = 100). Gas Chromatography (GC) was performed on a Shimadzu GC-2010 Plus gas chromatograph with SHRXI-MS- 15m x 0.25 mm x 0.25 μm column with nitrogen carrier gas and a flame ionization detector (FID). Enantiomeric ratios were measured *via* High Performance Liquid Chromatography (HPLC) using a Shimadzu Prominence HPLC system with SPD-M20A UV/VIS Photodiode array detector. Low-resolution Mass Spectrometry and High Resolution Mass Spectrometry were performed in the Department of Chemistry at

University of Illinois at Urbana-Champaign. The glove box, MBraun LABmaster sp, was maintained under nitrogen atmosphere.

**Materials:** Solvents used for extraction and column chromatography were reagent grade and used as received. Reaction solvents tetrahydrofuran (Fisher, unstabilized HPLC ACS grade), diethyl ether (Fisher, BHT stabilized ACS grade), methylene chloride (Fisher, unstabilized HPLC grade), dimethoxyethane (Fisher, certified ACS), toluene (Fisher, optima ACS grade), 1,4-dioxane (Fisher, certified ACS), acetonitrile (Fisher, HPLC grade), and hexanes (Fisher, ACS HPLC grade) were dried on a Pure Process Technology Glass Contour Solvent Purification System using activated Stainless Steel columns while following manufacture's recommendations for solvent preparation and dispensation unless otherwise noted. All alcohols were distilled and degassed by the freeze-pump-thaw method, and were stored under an atmosphere of nitrogen in glove box before use.

## B. Select Optimization Results

**Table SI: Ethereal Solvents for Esterification of Allylic Amines**

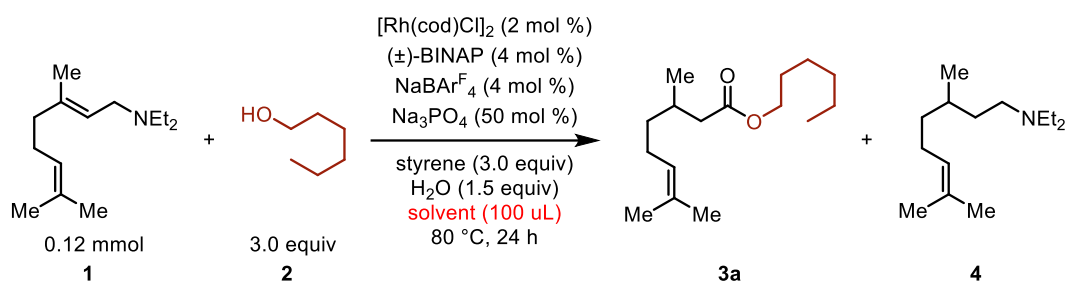

| Entry | Solvent           | 3a % yield (GC) | 4 % yield (GC) |
|-------|-------------------|-----------------|----------------|
| 1     | DME               | 96              | 2              |
| 2     | Et <sub>2</sub> O | 85              | 25             |
| 3     | THF               | 83              | 13             |
| 4     | 1,4-dioxane       | 75              | 26             |

**Table SII: Base Loading Screen for Esterification of Allylic Amines**

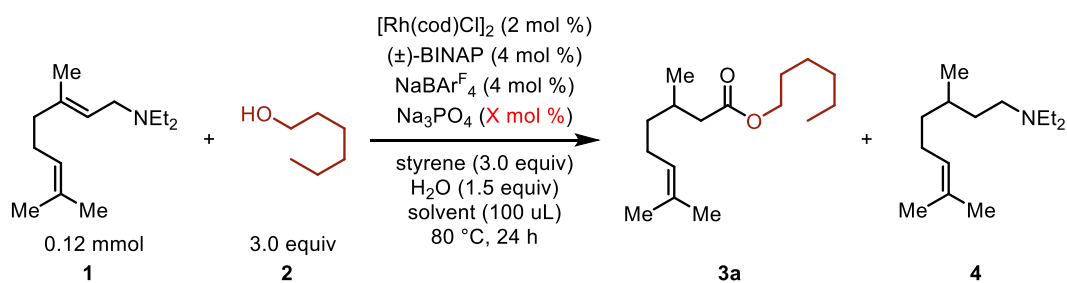

| Entry | Base loading (mol %) | 3a % yield (GC) | 4 % yield (GC) |
|-------|----------------------|-----------------|----------------|
| 1     | 0                    | 49              | 28             |
| 2     | 5                    | 63              | 25             |
| 3     | 15                   | 83              | 10             |
| 4     | 50                   | 89              | 8              |
| 5     | 100                  | 90              | 7              |

**Table SIII: Nucleophile Equivalence Screen for Esterification of Allylic Amines**

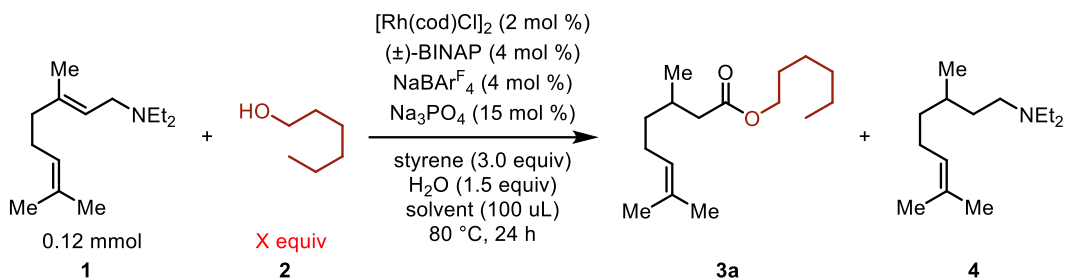

| Entry | 2 (X equiv) | 3a % yield (GC) | 4 % yield (GC) |
|-------|-------------|-----------------|----------------|
| 1     | 1.0         | 49              | 17             |
| 2     | 1.5         | 71              | 10             |
| 3     | 2.0         | 82              | 13             |
| 4     | 3.0         | 89              | 6              |

**Table SIV: Base Screen for Esterification of Allylic Amines**

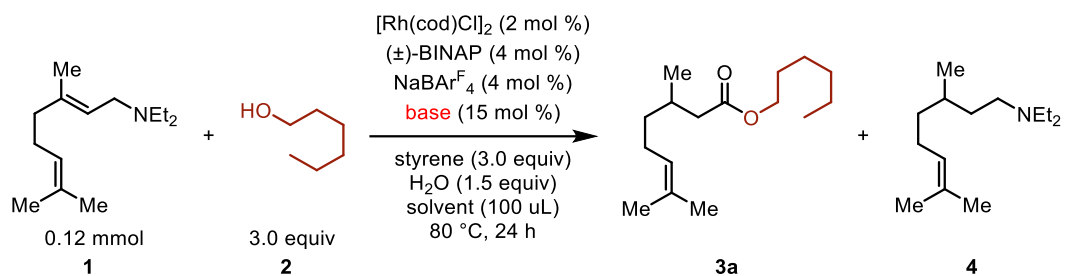

| Entry | Base                             | 3a % yield (GC) | 4 % yield (GC) |
|-------|----------------------------------|-----------------|----------------|
| 1     | Na <sub>3</sub> PO <sub>4</sub>  | 84              | 8              |
| 2     | K <sub>3</sub> PO <sub>4</sub>   | 26              | 5              |
| 3     | K <sub>2</sub> CO <sub>3</sub>   | 49              | 5              |
| 4     | NaH <sub>2</sub> PO <sub>4</sub> | 20              | 19             |
| 5     | Na <sub>2</sub> HPO <sub>4</sub> | 55              | 29             |
| 6     | Li <sub>3</sub> PO <sub>4</sub>  | 54              | 30             |

**Table SV: Time Screen for Esterification of Allylic Amines**

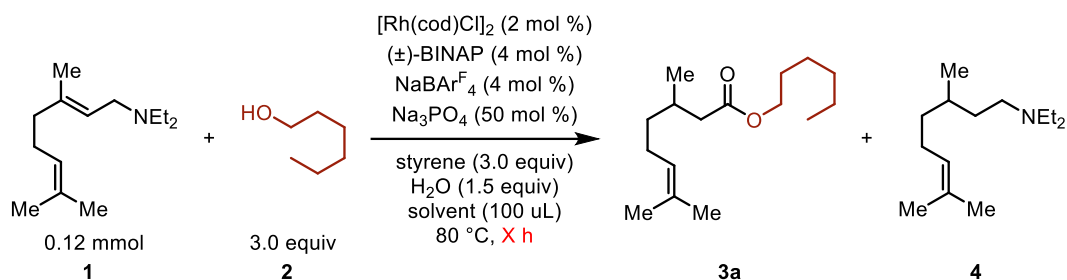

| Entry | Time (h) | 3a % yield (GC) |
|-------|----------|-----------------|
| 1     | 0.08     | 2               |
| 2     | 0.17     | 3               |
| 3     | 0.33     | 6               |
| 4     | 0.67     | 9               |
| 5     | 1        | 15              |
| 6     | 2        | 22              |
| 7     | 4        | 45              |
| 8     | 6        | 46              |
| 9     | 12       | 70              |
| 10    | 24       | 91              |

**Scheme SI: 1° vs. 3° Alcohol Competition Study**

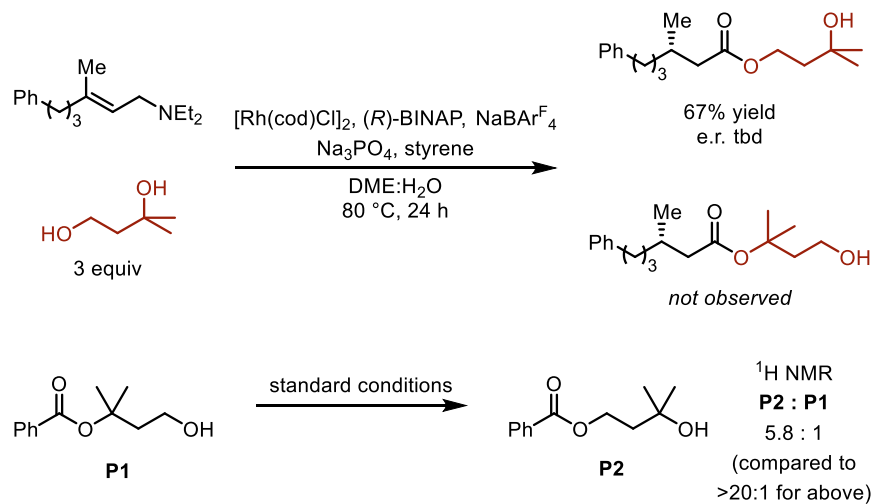

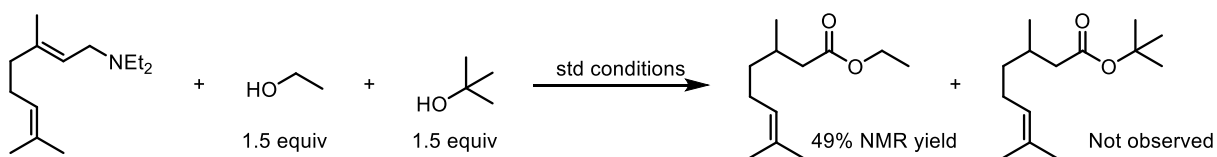

**Figure SI: Crude NMR analysis of aldehyde vs. allylic amine as substrate**

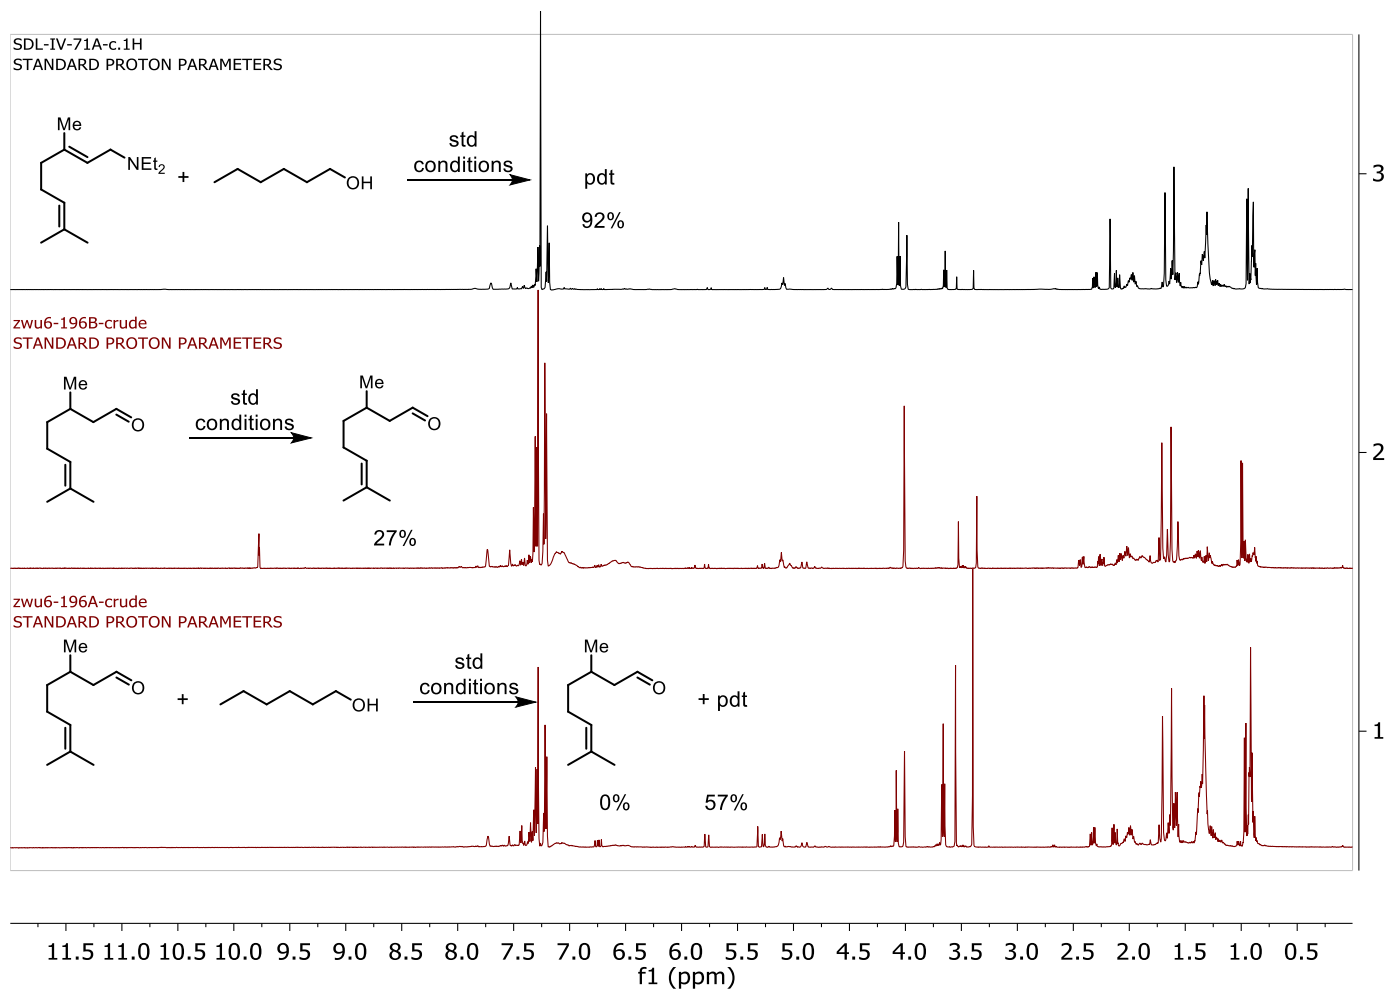

## C. Experimental Procedure, Isolation, and Characterization

General procedure for Rh-catalyzed isomerization and esterification of allylic amines with alcohols.

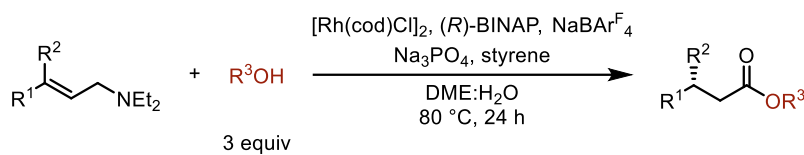

**General procedure:** Under atmosphere of nitrogen, [Rh(cod)Cl]<sub>2</sub> (1.2 mg, 0.0024 mmol, 2.0 mol %), (R)-BINAP (3.0 mg, 0.0048 mmol, 4.0 mol %), NaBARF<sub>4</sub> (4.3 mg, 0.0048 mmol, 4.0 mol %), and Na<sub>3</sub>PO<sub>4</sub> (9.8 mg, 0.060 mmol, 50 mol %) were added to a 4-mL vial equipped with a stir bar. Allylic amine **1** (25.1 mg, 0.12 mmol, 1.0 equiv) was then added to the reaction vial followed by addition of 1-hexanol **2** (45 μL, 0.36 mmol, 3.0 equiv), styrene (42 μL, 0.36 mmol, 3.0 equiv), and dimethoxyethane (0.100 mL, 0.120 M). The vial was then sealed with a plastic cap fitted with a PTFE-lined septum and removed from the glovebox. H<sub>2</sub>O (10.0 μL, 0.18 mmol, 1.5 equiv) was added to the reaction mixed *via* syringe through the septum. The reaction vial was placed on a hot plate with stirring at 80 °C for 24 h. The reaction vial was cooled to room temperature followed by the addition of diphenylmethane (10.0 μL) as an internal standard for analysis of the crude reaction mixture. The crude reaction mixture was diluted with methylene chloride prior to analysis. Celite was added to the reaction mixture which was then concentrated *in vacuo* and purified directly *via* flash column chromatography without further work-up procedures.

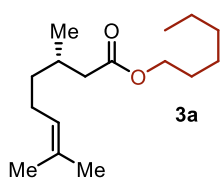

**Hexyl (S)-3,7-dimethyloct-6-enoate** C<sub>16</sub>H<sub>30</sub>O<sub>2</sub>

**Isolation:** 60 mL silica gel, dry load on celite. Load column with DCM. Eluent: 10% (5% Et<sub>2</sub>O/DCM)/Hex. R<sub>f</sub> = 0.07

26.3 mg of inseparable mixture of product (**3a**) and hydrogenated product (**3a'**) in a ratio of 8:1. Corrected MW = 254.65 g/mol. **3a** (76%); **3a'** (10%).

**<sup>1</sup>H NMR** (500 MHz, CDCl<sub>3</sub>) δ 5.09 (t, *J* = 7.1 Hz, 1H), 4.06 (t, *J* = 6.7 Hz, 2H), 2.30 (dd, *J* = 14.6, 5.9 Hz, 1H), 2.11 (dd, *J* = 14.6, 8.2 Hz, 1H), 2.06 – 1.90 (m, 3H), 1.68 (s, 3H), 1.61 (d, *J* = 7.8 Hz, 4H), 1.40 – 1.13 (m, 9H), 0.94 (d, *J* = 6.6 Hz, 3H), 0.93 – 0.85 (m, 4H).



Note: Integration values are higher than expected due to partial hydrogenation of the final product.

$^{13}\text{C}$  NMR (126 MHz,  $\text{CDCl}_3$ )  $\delta$  173.54 (**3a**), 131.65 (**3a**), 124.45 (**3a**), 64.49 (**3a**), 42.16 (**3a'**), 42.06 (**3a**), 39.22 (**3a'**), 37.10 (**3a'**), 36.94 (**3a**), 31.59 (**3a**), 30.58 (**3a'**), 30.23 (**3a**), 28.79 (**3a**), 28.08 (**3a'**), 25.86 (**3a**), 25.78 (**3a**), 25.58 (**3a**), 24.80 (**3a'**), 22.81 (**3a'**), 22.70 (**3a**), 19.90 (**3a'**), 19.78 (**3a**), 17.79 (**3a**), 14.15 (**3a**).

**HRMS:** (ESI-TOF)  $m/z$ :  $[\text{M}+\text{H}^+]$  calculated for  $\text{C}_{16}\text{H}_{31}\text{O}_2$ , 255.2324; found, 255.2327.

**IR:**  $\nu$  2936, 2927, 2858, 1735  $\text{cm}^{-1}$ .

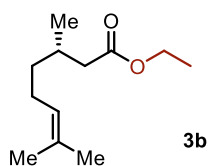

**Ethyl (S)-3,7-dimethyloct-6-enoate**  $\text{C}_{12}\text{H}_{22}\text{O}_2$

**Isolation:** 60 mL silica gel, dry load on celite. Load column with DCM. Eluent: 20% (5%  $\text{Et}_2\text{O}/\text{DCM}$ )/Hex.  $R_f = 0.08$

16.2 mg of inseparable mixture of product (**3b**) and hydrogenated product (**3b'**) in a ratio of 7:1. Corrected MW = 198.55 g/mol. **3b (60%)**; **3b' (8%)**.

$^1\text{H}$  NMR (500 MHz,  $\text{CDCl}_3$ )  $\delta$  5.09 (tdt,  $J = 7.1, 2.8, 1.4$  Hz, 1H), 4.13 (q,  $J = 7.1$  Hz, 2H), 2.30 (dd,  $J = 14.6, 6.0$  Hz, 1H), 2.10 (dd,  $J = 14.6, 8.2$  Hz, 1H), 2.05 – 1.90 (m, 3H), 1.68 (d,  $J = 1.3$  Hz, 3H), 1.60 (s, 3H), 1.40 – 1.11 (m, 7H), 0.94 (d,  $J = 6.7$  Hz, 3H), 0.86 (dd,  $J = 6.6, 0.9$  Hz, 1H) (**3b'**).

Note: Integration values are higher than expected due to partial hydrogenation of the final product.

$^{13}\text{C}$  NMR (126 MHz,  $\text{CDCl}_3$ )  $\delta$  173.44 (**3b**), 131.67 (**3b**), 124.45 (**3b**), 60.24 (**3b**), 42.13 (**3b'**), 42.02 (**3b**), 39.21 (**3b'**), 37.11 (**3b'**), 36.94 (**3b**), 30.55 (**3b'**), 30.20 (**3b**), 29.86 (**3b'**), 28.07 (**3b'**), 25.86 (**3b**), 25.58 (**3b**), 24.79 (**3b'**), 22.81 (**3b'**), 22.72 (**3b'**), 19.89 (**3b'**), 19.76 (**3b**), 17.79 (**3b**), 14.44 (**3b**).

**HRMS** (ESI-TOF)  $m/z$ :  $[\text{M}+\text{H}^+]$  calculated for  $\text{C}_{12}\text{H}_{22}\text{O}_2$ , 197.1542; found, 197.1541.

**IR:**  $\nu$  2960, 2861, 2851, 1733  $\text{cm}^{-1}$ .

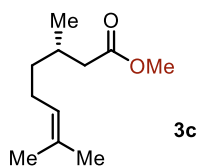

**Methyl (S)-3,7-dimethyloct-6-enoate**  $\text{C}_{11}\text{H}_{20}\text{O}_2$

**Isolation:** 60 mL silica gel, dry load on celite. Load column with DCM. Eluent: 10% (5%  $\text{Et}_2\text{O}/\text{DCM}$ )/Hex.  $R_f = 0.9$

15.9 mg of inseparable mixture of product (**3c**) and hydrogenated product (**3c'**) in a ratio of 6:1. Corrected MW = 184.54 g/mol. **3c (62%)**; **3c' (9%)**.

**<sup>1</sup>H NMR** (500 MHz, CDCl<sub>3</sub>) δ 5.09 (ddq, *J* = 8.5, 5.7, 1.4 Hz, 1H), 3.67 (s, 3H), 2.32 (dd, *J* = 14.7, 5.9 Hz, 1H), 2.12 (dd, *J* = 14.7, 8.3 Hz, 1H), 2.06 – 1.91 (m, 3H), 1.68 (d, *J* = 1.4 Hz, 3H), 1.60 (s, 3H), 1.39 – 1.12 (m, 3H), 0.94 (d, *J* = 6.7 Hz, 3H), 0.86 (dd, *J* = 6.6, 1.0 Hz, 1H) (**3c'**).

Note: Integration values are inflated due to presence of the hydrogenated product.

**<sup>13</sup>C NMR** (126 MHz, CDCl<sub>3</sub>) δ 173.88 (**3c**), 131.71 (**3c**), 124.41 (**3c**), 51.52 (**3c**), 41.86 (**3c'**), 41.75 (**3c**), 39.19 (**3c'**), 37.11 (**3c'**), 36.93 (**3c**), 30.53 (**3c'**), 30.20 (**3c**), 28.07 (**3c'**), 25.86 (**3c**), 25.58 (**3c**), 24.80 (**3c'**), 22.81 (**3c'**), 22.72 (**3c'**), 19.91 (**3c'**), 19.78 (**3c**), 17.79 (**3c**).

**HRMS** (EI-TOF) *m/z*: [M] calculated for C<sub>11</sub>H<sub>20</sub>O<sub>2</sub>, 184.14633; found, 184.14651.

**IR**: ν 2956, 2920, 2852, 1739 cm<sup>-1</sup>.

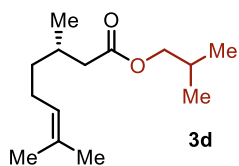

**Isobutyl (S)-3,7-dimethyloct-6-enoate** C<sub>14</sub>H<sub>26</sub>O<sub>2</sub>

**Isolation**: 60 mL silica gel, dry load on celite. Load column with DCM. Eluent: 10% (5% Et<sub>2</sub>O/DCM)/Hex. R<sub>f</sub> = 0.08

22.3 mg of inseparable mixture of product (**3d**) and hydrogenated product (**3d'**) in a ratio of 14:1. Corrected MW = 226.50 g/mol. **3d** (76%); **3d'** (6%).

**<sup>1</sup>H NMR** (500 MHz, CDCl<sub>3</sub>) δ 5.09 (tp, *J* = 7.1, 1.4 Hz, 1H), 3.85 (dd, *J* = 6.7, 1.0 Hz, 2H), 2.32 (dd, *J* = 14.6, 6.0 Hz, 1H), 2.12 (dd, *J* = 14.6, 8.2 Hz, 1H), 2.07 – 1.85 (m, 4H), 1.68 (d, *J* = 1.4 Hz, 3H), 1.60 (s, 3H), 1.42 – 1.11 (m, 4H), 0.95 (d, *J* = 6.6 Hz, 3H), 0.93 (d, *J* = 6.7 Hz, 6H), 0.86 (dd, *J* = 6.6, 0.8 Hz, 1H).

Note: Integration values are higher than expected due to partial hydrogenation of the final product.

**<sup>13</sup>C NMR** (126 MHz, CDCl<sub>3</sub>) δ 173.53 (**3d**), 131.67 (**3d**), 124.44 (**3d**), 70.52 (**3d**), 42.15 (**3d'**), 42.06 (**3d**), 39.22 (**3d'**), 37.12 (**3d'**), 36.94 (**3d**), 30.59 (**3d'**), 30.21 (**3d**), 28.08 (**3d'**), 27.88 (**3d**), 25.86 (**3d**), 25.58 (**3d**), 24.80 (**3d'**), 22.81 (**3d'**), 22.72 (**3d'**), 19.92 (**3d'**), 19.80 (**3d**), 19.28 (**3d**), 17.79 (**3d**).

**HRMS** (ESI-TOF) *m/z*: [M+H<sup>+</sup>] calculated for C<sub>14</sub>H<sub>26</sub>O<sub>2</sub>, 249.1831; found, 249.1835.

**IR**: ν 2961, 2916, 2875, 2850, 1735 cm<sup>-1</sup>

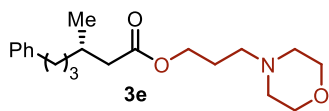

**3-morpholinopropyl (S)-3-methyl-6-phenylhexanoate** C<sub>20</sub>H<sub>31</sub>NO<sub>3</sub>

**Isolation:** 100 g basic alumina + 6 g H<sub>2</sub>O, dry load on celite. Eluent: 2.5% Et<sub>2</sub>O/DCM.

R<sub>f</sub> = 0.25

28.4 mg (**3e**); 71% yield.

**<sup>1</sup>H NMR** (500 MHz, CDCl<sub>3</sub>) δ 7.30 – 7.27 (m, 2H), 7.20 – 7.15 (m, 3H), 4.12 (t, *J* = 6.6 Hz, 2H), 3.70 (t, *J* = 4.7 Hz, 4H), 2.59 (td, *J* = 8.5, 6.8, 4.0 Hz, 2H), 2.45 – 2.37 (m, 5H), 2.29 (dd, *J* = 14.7, 6.0 Hz, 1H), 2.11 (dd, *J* = 14.7, 8.1 Hz, 1H), 1.98 (dq, *J* = 14.0, 7.7, 7.2 Hz, 1H), 1.80 (dt, *J* = 13.7, 6.6 Hz, 2H), 1.69 – 1.55 (m, 3H), 1.41 – 1.33 (m, 1H), 1.29 – 1.20 (m, 1H), 0.94 (d, *J* = 6.6 Hz, 3H).

**<sup>13</sup>C NMR** (126 MHz, CDCl<sub>3</sub>) δ 173.40, 142.64, 128.50, 128.42, 125.84, 67.14, 62.67, 55.59, 53.85, 41.98, 36.48, 36.17, 30.45, 28.99, 26.02, 19.85.

**HRMS** (ESI-TOF) *m/z*: [M+H<sup>+</sup>] calculated for C<sub>20</sub>H<sub>32</sub>NO<sub>3</sub>, 334.2382; found, 334.2394.

**IR:** ν 2941, 2919, 2849, 2809, 1732, 1118 cm<sup>-1</sup>.

[α]<sub>D</sub><sup>22</sup> = -4.6945 (*C* = 1.340, CHCl<sub>3</sub>)

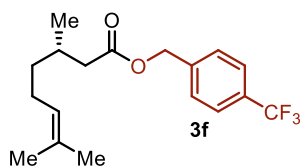

**4-(trifluoromethyl)benzyl (S)-3,7-dimethyloct-6-enoate** C<sub>18</sub>H<sub>23</sub>F<sub>3</sub>O<sub>2</sub>

**Isolation:** 60 mL silica gel, dry load on celite. Load column with DCM. Eluent: 20% (5% Et<sub>2</sub>O/DCM)/Hex. R<sub>f</sub> = 0.1

23.2 mg of inseparable mixture of product (**3f**) and hydrogenated product (**3f'**) in a ratio of 7:1.

Corrected MW = 328.64 g/mol. **Product yield (51%)**; byproduct yield (8%).

**<sup>1</sup>H NMR** (500 MHz, CDCl<sub>3</sub>) δ 7.62 (d, *J* = 8.0 Hz, 2H), 7.46 (d, *J* = 7.9 Hz, 2H), 5.16 (s, 2H), 5.06 (ddt, *J* = 8.5, 5.8, 1.4 Hz, 1H), 2.38 (dd, *J* = 14.8, 5.9 Hz, 1H), 2.19 (dd, *J* = 14.8, 8.1 Hz, 1H), 1.98 (tq, *J* = 14.2, 7.6, 7.0 Hz, 3H), 1.67 (s, 3H), 1.58 (s, 3H), 1.56 – 1.42 (m, 1H), 1.35 (ddt, *J* = 12.5, 9.5, 6.1 Hz, 1H), 1.30 – 1.06 (m, 2H), 0.95 (dd, *J* = 6.7, 0.9 Hz, 3H), 0.85 (dd, *J* = 6.5, 0.8 Hz, 1H) (**3f'**).

Note: integration values are inflated due to presence of hydrogenated byproduct.

**<sup>13</sup>C NMR** (126 MHz, CDCl<sub>3</sub>) δ 173.01 (**3f**), 140.28 (**3f**), 131.79 (**3f**), 130.47 (q, *J* = 32.6 Hz) (**3f**), 128.29 (**3f**), 125.65 (q, *J* = 3.8 Hz) (**3f**), 124.27 (**3f**), 124.16 (q, *J* = 272.1 Hz) (**3f**), 65.20 (**3f**), 41.92 (**3f'**), 41.82 (**3f**), 39.17

(3f'), 37.05 (3f'), 36.88 (3f), 30.59 (3f'), 30.22 (3f), 28.05 (3f'), 25.84 (3f), 25.54 (3f), 24.77 (3f'), 22.79 (3f'), 22.70 (3f'), 19.92 (3f'), 19.79 (3f), 17.79 (3f).

<sup>19</sup>F NMR (471 MHz, CDCl<sub>3</sub>) δ -62.65.

HRMS (ESI-TOF) *m/z*: [M+H<sup>+</sup>] calculated for C<sub>18</sub>H<sub>23</sub>F<sub>3</sub>O<sub>2</sub>, 351.1548; found, 351.1545.

IR: ν 2959, 2918, 2855, 1738 cm<sup>-1</sup>.

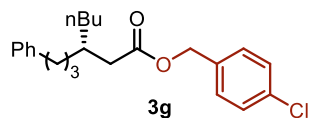

**4-chlorobenzyl (S)-3-(3-phenylpropyl)heptanoate** C<sub>23</sub>H<sub>29</sub>ClO<sub>2</sub>

**Isolation:** 60 mL silica gel, dry load on celite. Load column with DCM. Eluent: 20%

(5% Et<sub>2</sub>O/DCM)/Hex. R<sub>f</sub> = 0.11

37.6 mg (3g); 84% yield.

<sup>1</sup>H NMR (500 MHz, CDCl<sub>3</sub>) δ 7.34 – 7.24 (m, 6H), 7.20 – 7.13 (m, 3H), 5.05 (s, 2H), 2.56 (t, *J* = 7.8 Hz, 2H), 2.28 (dd, *J* = 6.9, 2.3 Hz, 2H), 1.89 (hept, *J* = 6.2 Hz, 1H), 1.59 (p, *J* = 8.0 Hz, 2H), 1.40 – 1.15 (m, 8H), 0.86 (t, *J* = 6.9 Hz, 3H).

<sup>13</sup>C NMR (126 MHz, CDCl<sub>3</sub>) δ 173.36, 142.63, 134.79, 134.22, 129.82, 128.86, 128.49, 128.41, 125.84, 65.33, 39.28, 36.27, 35.16, 33.70, 33.66, 28.86, 28.59, 23.03, 14.19.

HRMS (ESI-TOF) *m/z*: [M+H<sup>+</sup>] calculated for C<sub>23</sub>H<sub>29</sub>ClO<sub>2</sub>, 395.1754; found, 395.1759.

IR: ν 2945, 2926, 2856, 1733 cm<sup>-1</sup>.

[α]<sub>D</sub><sup>23</sup> = -1.1200 (*C* = 0.750, CHCl<sub>3</sub>)

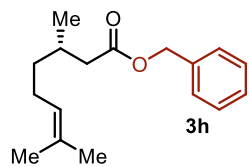

**Benzyl (S)-3,7-dimethyloct-6-enoate** C<sub>17</sub>H<sub>24</sub>O<sub>2</sub>

**Isolation:** 60 mL silica gel, dry load on celite. Load column with DCM. Eluent: 10% (5% Et<sub>2</sub>O/DCM)/Hex. R<sub>f</sub> = 0.1

25.0 mg (3h); 80% yield

<sup>1</sup>H NMR (500 MHz, CDCl<sub>3</sub>) δ 7.41 – 7.29 (m, 5H), 5.12 (s, 2H), 5.07 (tdq, *J* = 7.0, 2.8, 1.3 Hz, 1H), 2.37 (dd, *J* = 14.7, 6.0 Hz, 1H), 2.17 (dd, *J* = 14.8, 8.2 Hz, 1H), 2.05 – 1.90 (m, 3H), 1.67 (d, *J* = 1.4 Hz, 3H), 1.59 (s, 3H), 1.35 (dddd, *J* = 13.4, 9.5, 6.5, 5.8 Hz, 1H), 1.22 (dddd, *J* = 13.6, 9.3, 7.9, 6.2 Hz, 1H), 0.94 (d, *J* = 6.6 Hz, 3H).

$^{13}\text{C}$  NMR (126 MHz,  $\text{CDCl}_3$ )  $\delta$  173.22, 136.29, 131.69, 128.68, 128.34, 128.29, 124.39, 66.18, 41.95, 36.91, 30.22, 25.86, 25.55, 19.77, 17.79.

**HRMS** (ESI-TOF)  $m/z$ :  $[\text{M}+\text{H}^+]$  calculated for  $\text{C}_{17}\text{H}_{24}\text{O}_2$ , 283.1674; found, 283.1667.

**IR**:  $\nu$  2957, 2925, 2855, 1730  $\text{cm}^{-1}$ .

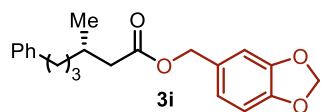

**Benzo[d][1,3]dioxol-5-ylmethyl (S)-3-methyl-6-phenylhexanoate**  $\text{C}_{21}\text{H}_{24}\text{O}_4$

**Isolation**: 60 mL silica gel, dry load on celite. Load column with DCM. Eluent: 30%

(5%  $\text{Et}_2\text{O}/\text{DCM}$ )/Hex.  $R_f$  = 0.15

24.5 mg (**3i**); 60% yield.

$^1\text{H}$  NMR (500 MHz,  $\text{CDCl}_3$ )  $\delta$  7.27 (m, 2H), 7.20 – 7.13 (m, 3H), 6.84 – 6.75 (m, 3H), 5.96 (s, 2H), 5.00 (s, 2H), 2.62 – 2.52 (m, 2H), 2.32 (dd,  $J$  = 14.8, 6.2 Hz, 1H), 2.15 (dd,  $J$  = 14.7, 8.0 Hz, 1H), 1.99 (tq,  $J$  = 13.6, 7.0 Hz, 1H), 1.70 – 1.54 (m, 2H), 1.36 (ddt,  $J$  = 13.4, 10.9, 5.6 Hz, 1H), 1.28 – 1.19 (m, 1H), 0.93 (d,  $J$  = 6.6 Hz, 3H).

$^{13}\text{C}$  NMR (126 MHz,  $\text{CDCl}_3$ )  $\delta$  173.18, 147.92, 147.71, 142.66, 130.03, 128.50, 128.41, 125.82, 122.40, 109.18, 108.37, 101.29, 66.16, 41.97, 36.43, 36.16, 30.48, 28.97, 19.86.

**HRMS** (ESI-TOF)  $m/z$ :  $[\text{M}+\text{H}^+]$  calculated for  $\text{C}_{21}\text{H}_{24}\text{O}_4$ , 363.1586; found, 363.1584.

**IR**:  $\nu$  2920, 2852, 1731, 1243, 1039  $\text{cm}^{-1}$ .

$[\alpha]_{\text{D}}^{23}$  = -3.5958 ( $C$  = 1.580,  $\text{CHCl}_3$ )

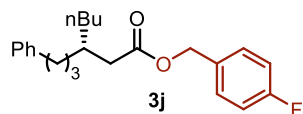

**4-fluorobenzyl (S)-3-(3-phenylpropyl)heptanoate**  $\text{C}_{23}\text{H}_{29}\text{FO}_2$

**Isolation**: 60 mL silica gel, dry load on celite. Load column with DCM. Eluent: 20%

(5%  $\text{Et}_2\text{O}/\text{DCM}$ )/Hex.  $R_f$  = 0.11

34.2 mg (**3j**); 80% yield.

$^1\text{H}$  NMR (500 MHz,  $\text{CDCl}_3$ )  $\delta$  7.34 – 7.26 (m, 4H), 7.20 – 7.13 (m, 3H), 7.06 – 7.01 (m, 2H), 5.05 (s, 2H), 2.55 (t,  $J$  = 7.8 Hz, 2H), 2.27 (dd,  $J$  = 6.9, 2.1 Hz, 2H), 1.89 (hept,  $J$  = 6.2 Hz, 1H), 1.59 (p,  $J$  = 8.0 Hz, 2H), 1.40 – 1.16 (m, 8H), 0.85 (t,  $J$  = 6.9 Hz, 3H).

$^{13}\text{C}$  NMR (126 MHz,  $\text{CDCl}_3$ )  $\delta$  173.41, 162.75 (d,  $J = 246.7$  Hz), 142.65, 132.14 (d,  $J = 3.3$  Hz), 130.42 (d,  $J = 8.35$  Hz), 128.45 (d,  $J = 10.0$  Hz), 125.83, 115.58 (d,  $J = 21.6$  Hz), 65.44, 39.32, 36.27, 35.16, 33.71, 33.66, 28.85, 28.59, 23.03, 14.19.

$^{19}\text{F}$  NMR (471 MHz,  $\text{CDCl}_3$ )  $\delta$  -113.79.

HRMS (ESI-TOF)  $m/z$ :  $[\text{M}+\text{H}^+]$  calculated for  $\text{C}_{23}\text{H}_{29}\text{FO}_2$ , 379.2049; found, 379.2057.

IR:  $\nu$  2945, 2928, 2857, 1734  $\text{cm}^{-1}$ .

$[\alpha]_{\text{D}}^{23} = -1.3800$  ( $C = 1.40$ ,  $\text{CHCl}_3$ )

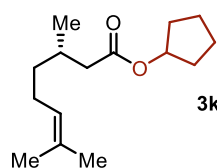

**Cyclopentyl (S)-3,7-dimethyloct-6-enoate**  $\text{C}_{15}\text{H}_{26}\text{O}_2$

**3k** Isolation: 60 mL silica gel, dry load on celite. Load column with DCM. Eluent: 20% (5%  $\text{Et}_2\text{O}/\text{DCM}$ )/Hex.  $R_f = 0.1$

21.5 mg of inseparable mixture of product (**3k**) and hydrogenated product (**3k'**) in a ratio of 8:1. Corrected MW = 238.61 g/mol. **3k** (66%); **3k'** (9%).

$^1\text{H}$  NMR (500 MHz,  $\text{CDCl}_3$ )  $\delta$  5.16 (tt,  $J = 5.7, 2.7$  Hz, 1H), 5.09 (dddd,  $J = 7.1, 5.7, 2.9, 1.5$  Hz, 1H), 2.26 (dd,  $J = 14.4, 6.1$  Hz, 1H), 2.07 (dd,  $J = 14.5, 8.1$  Hz, 1H), 2.04 – 1.79 (m, 5H), 1.76 – 1.63 (m, 7H), 1.63 – 1.52 (m, 5H), 1.39 – 1.11 (m, 4H), 0.94 (d,  $J = 6.7$  Hz, 3H), 0.86 (d,  $J = 6.6$  Hz, 1H) (**3k'**).

Note: Integration values are inflated due to presence of the hydrogenated product.

$^{13}\text{C}$  NMR (126 MHz,  $\text{CDCl}_3$ )  $\delta$  173.25 (**3k**), 131.64 (**3k**), 124.48 (**3k**), 42.39 (**3k'**), 42.30 (**3k**), 39.24 (**3k'**), 37.09 (**3k'**), 36.92 (**3k**), 32.85 (**3k**), 32.81 (**3k**), 30.63 (**3k'**), 30.26 (**3k**), 28.08 (**3k'**), 25.86 (**3k**), 25.57 (**3k**), 24.78 (**3k'**), 23.87 (**3k**), 22.81 (**3k'**), 22.73 (**3k'**), 19.87 (**3k'**), 19.74 (**3k**), 17.79 (**3k**).

HRMS (ESI-TOF)  $m/z$ :  $[\text{M}+\text{H}^+]$  calculated for  $\text{C}_{15}\text{H}_{26}\text{O}_2$ , 237.1855; found, 237.1846.

IR:  $\nu$  2957, 2918, 2856, 2849, 1729  $\text{cm}^{-1}$ .

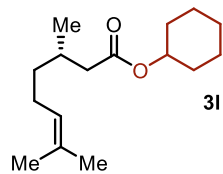

**Cyclohexyl (S)-3,7-dimethyloct-6-enoate**  $\text{C}_{16}\text{H}_{28}\text{O}_2$

**3l** Isolation: 60 mL silica gel, dry load on celite. Load column with DCM. Eluent: 20% (5%  $\text{Et}_2\text{O}/\text{DCM}$ )/Hex.  $R_f = 0.1$

19.1 mg of inseparable mixture of product (**31**) and hydrogenated product (**31'**) in a ratio of 8:1.

Corrected MW = 252.62 g/mol. **31** (**56%**); **31'** (7%).

**<sup>1</sup>H NMR** (500 MHz, CDCl<sub>3</sub>) δ 5.09 (ddt, *J* = 7.2, 5.7, 1.5 Hz, 1H), 4.77 (tt, *J* = 8.9, 3.8 Hz, 1H), 2.28 (dd, *J* = 14.4, 6.1 Hz, 1H), 2.09 (dd, *J* = 14.4, 8.1 Hz, 1H), 2.05 – 1.91 (m, 3H), 1.88 – 1.78 (m, 2H), 1.77 – 1.69 (m, 2H), 1.68 (s, 3H), 1.60 (s, 3H), 1.58 – 1.50 (m, 2H), 1.46 – 1.11 (m, 9H), 0.94 (d, *J* = 6.6 Hz, 3H), 0.86 (d, *J* = 6.6 Hz, 1H) (**31'**).

Note: Integration values are higher than expected due to partial hydrogenation of the final product.

**<sup>13</sup>C NMR** (126 MHz, CDCl<sub>3</sub>) δ 172.86 (**31**), 131.59 (**31**), 124.47 (**31**), 72.38 (**31**), 42.46 (**31'**), 42.37 (**31**), 39.21 (**31'**), 37.07 (**31'**), 36.90 (**31**), 31.84 (**31**), 31.80 (**31**), 30.64 (**31'**), 30.27 (**31**), 28.04 (**31'**), 25.83 (**31**), 25.55 (**31**), 24.76 (**31'**), 23.90 (**31**), 22.78 (**31'**), 22.70 (**31'**), 19.81 (**31'**), 19.69 (**31**), 17.77 (**31**).

**HRMS** (ESI-TOF) *m/z*: [M+H<sup>+</sup>] calculated for C<sub>16</sub>H<sub>28</sub>O<sub>2</sub>, 251.2011; found, 251.2017.

**IR**: ν 2930, 2859, 1730 cm<sup>-1</sup>.

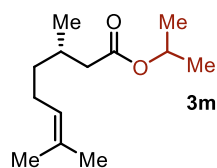

**Isopropyl (*S*)-3,7-dimethyloct-6-enoate** C<sub>13</sub>H<sub>24</sub>O<sub>2</sub>

**3m**

**Isolation:** 60 mL silica gel, dry load on celite. Load column with DCM. Eluent: 10% (5% Et<sub>2</sub>O/DCM)/Hex. R<sub>f</sub> = 0.7

11.0 mg of inseparable mixture of product (**3m**) and hydrogenated product (**3m'**) in a ratio of 6:1. Corrected MW = 212.60 g/mol. **3m** (**37%**); **3m'** (6%).

**<sup>1</sup>H NMR** (500 MHz, CDCl<sub>3</sub>) δ 5.09 (tdt, *J* = 7.1, 2.9, 1.4 Hz, 1H), 5.01 (hept, *J* = 6.3 Hz, 1H), 2.27 (dd, *J* = 14.5, 6.0 Hz, 1H), 2.07 (dd, *J* = 14.4, 8.2 Hz, 1H), 2.04 – 1.92 (m, 3H), 1.68 (d, *J* = 1.3 Hz, 3H), 1.60 (s, 3H), 1.39 – 1.27 (m, 3H), 1.23 (d, *J* = 6.3 Hz, 6H), 0.94 (d, *J* = 6.7 Hz, 3H), 0.86 (d, *J* = 6.5 Hz, 1H) (**3m'**).

Note: Integration values are inflated due to presence of the hydrogenated product.

**<sup>13</sup>C NMR** (126 MHz, CDCl<sub>3</sub>) δ 172.96 (**3m**), 131.63 (**3m**), 124.49 (**3m**), 67.43 (**3m**), 42.45 (**3m**), 42.35 (**3m**), 39.23 (**3m'**), 37.10 (**3m'**), 36.94 (**3m**), 30.61 (**3m'**), 30.26 (**3m**), 29.86 (**3m'**), 28.07 (**3m'**), 25.86 (**3m**), 25.57 (**3m**), 24.78 (**3m'**), 22.81 (**3m'**), 22.73 (**3m'**), 22.05 (**3m**), 22.02 (**3m**), 19.83 (**3m'**), 19.71 (**3m**), 17.79 (**3m**).

**IR**: ν 2962, 2920, 2854, 1731 cm<sup>-1</sup>.

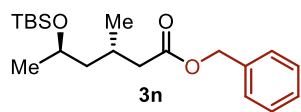

**Benzyl (3*S*,5*R*)-5-((tert-butyldimethylsilyloxy)-3-methylhexanoate** C<sub>20</sub>H<sub>34</sub>O<sub>3</sub>Si

**Isolation:** 60 mL silica gel, dry load on celite. Load column with DCM. Eluent: 20%

(5% Et<sub>2</sub>O/DCM)/Hex. R<sub>f</sub> = 0.1

28.2 mg (**3n**); 67% yield.

**<sup>1</sup>H NMR** (500 MHz, CDCl<sub>3</sub>) δ 7.42 – 7.28 (m, 5H), 5.11 (dd, *J* = 22.5, 12.4 Hz, 2H), 3.86 (dddt, *J* = 7.9, 5.9, 4.6, 1.9 Hz, 1H), 2.36 (q, *J* = 9.2 Hz, 1H), 2.22 – 2.11 (m, 2H), 1.48 (ddd, *J* = 13.2, 8.6, 4.4 Hz, 1H), 1.18 (dq, *J* = 13.7, 4.3 Hz, 1H), 1.11 (d, *J* = 6.0 Hz, 3H), 0.93 (d, *J* = 6.2 Hz, 3H), 0.87 (s, 9H), 0.04 (d, *J* = 4.0 Hz, 6H).

**<sup>13</sup>C NMR** (126 MHz, CDCl<sub>3</sub>) δ 172.94, 136.30, 128.66, 128.32, 128.25, 66.39, 66.15, 46.84, 42.65, 27.22, 26.03, 24.57, 19.77, 18.22, -3.95, -4.66.

**HRMS** (ESI-TOF) *m/z*: [M+H<sup>+</sup>] calculated for C<sub>20</sub>H<sub>34</sub>O<sub>3</sub>Si, 373.2175; found, 373.2170.

**IR:** ν 2955, 2929, 2896, 2856, 1736, 1255, 1155, 1065, 835, 774 cm<sup>-1</sup>.

[α]<sub>D</sub><sup>23</sup> = -12.4766 (*C* = 1.270, CHCl<sub>3</sub>)

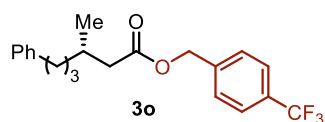

**4-(trifluoromethyl)benzyl (S)-3-methyl-6-phenylhexanoate** C<sub>21</sub>H<sub>23</sub>F<sub>3</sub>O<sub>2</sub>

**Isolation:** 60 mL silica gel, dry load on celite. Load column with DCM. Eluent: 20%

(5% Et<sub>2</sub>O/DCM)/Hex. R<sub>f</sub> = 0.09

28.0 mg (**3o**); 64% yield.

**<sup>1</sup>H NMR** (500 MHz, CDCl<sub>3</sub>) δ 7.62 (d, *J* = 8.0 Hz, 2H), 7.45 (d, *J* = 8.1 Hz, 2H), 7.31 – 7.26 (m, 2H), 7.20 – 7.13 (m, 3H), 5.15 (s, 2H), 2.64 – 2.52 (m, 2H), 2.37 (dd, *J* = 14.8, 6.1 Hz, 1H), 2.19 (dd, *J* = 14.9, 8.0 Hz, 1H), 2.01 (ddt, *J* = 20.4, 13.7, 6.8 Hz, 1H), 1.72 – 1.54 (m, 2H), 1.37 (ddt, *J* = 13.3, 10.8, 5.6 Hz, 1H), 1.25 (dddd, *J* = 13.3, 10.5, 7.7, 5.4 Hz, 1H), 0.94 (d, *J* = 6.6 Hz, 3H).

**<sup>13</sup>C NMR** (126 MHz, CDCl<sub>3</sub>) δ 172.97, 142.57, 140.25, 130.48 (q, *J* = 32.5 Hz), 128.49, 128.43, 128.30, 125.86, 125.66 (q, *J* = 3.82 Hz), 124.16 (q, *J* = 272.18 Hz), 65.21, 41.81, 36.42, 36.14, 30.47, 28.95, 19.87.

**<sup>19</sup>F NMR** (471 MHz, CDCl<sub>3</sub>) δ -62.64.

**HRMS** (ESI-TOF) *m/z*: [M+H<sup>+</sup>] calculated for C<sub>21</sub>H<sub>23</sub>F<sub>3</sub>O<sub>2</sub>, 387.1548; found, 387.1546.



**IR:**  $\nu$  2927, 2851, 1736, 1323, 1124, 1067  $\text{cm}^{-1}$ .

$[\alpha]_{\text{D}}^{23} = -3.0616$  ( $C = 1.320$ ,  $\text{CHCl}_3$ )

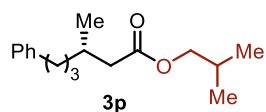

**Isobutyl (S)-3-methyl-6-phenylhexanoate**  $\text{C}_{17}\text{H}_{26}\text{O}_2$

**Isolation:** 60 mL silica gel, dry load on celite. Load column with DCM. Eluent: 20% (5%

$\text{Et}_2\text{O}/\text{DCM})/\text{Hex}$ .  $R_f = 0.08$

26.8 mg (**3p**); 85% yield.

**$^1\text{H}$  NMR** (500 MHz,  $\text{CDCl}_3$ )  $\delta$  7.31 – 7.26 (m, 2H), 7.20 – 7.15 (m, 3H), 3.84 (d,  $J = 6.7$  Hz, 2H), 2.66 – 2.53 (m, 2H), 2.30 (dd,  $J = 14.6, 6.1$  Hz, 1H), 2.12 (dd,  $J = 14.6, 8.0$  Hz, 1H), 1.99 (dq,  $J = 14.0, 7.7, 7.2$  Hz, 1H), 1.91 (dp,  $J = 13.4, 6.7$  Hz, 1H), 1.72 – 1.55 (m, 2H), 1.38 (ddt,  $J = 13.4, 11.0, 5.6$  Hz, 1H), 1.25 (dtt,  $J = 10.5, 7.8, 5.4$  Hz, 1H), 0.94 (d,  $J = 6.7$  Hz, 3H), 0.93 (d,  $J = 6.7$  Hz, 6H).

**$^{13}\text{C}$  NMR** (126 MHz,  $\text{CDCl}_3$ )  $\delta$  173.49, 142.69, 128.51, 128.41, 125.82, 70.52, 42.06, 36.48, 36.20, 30.48, 29.02, 27.87, 19.86, 19.28.

**HRMS** (ESI-TOF)  $m/z$ :  $[\text{M}+\text{H}^+]$  calculated for  $\text{C}_{17}\text{H}_{26}\text{O}_2$ , 285.1831; found, 285.1827.

**IR:**  $\nu$  2959, 2931, 2873, 1733  $\text{cm}^{-1}$ .

$[\alpha]_{\text{D}}^{23} = -5.9194$  ( $C = 1.265$ ,  $\text{CHCl}_3$ )

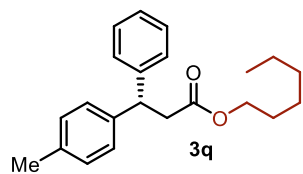

**hexyl 3-phenyl-3-(p-tolyl)propanoate**  $\text{C}_{22}\text{H}_{28}\text{O}_2$

**Isolation:** 60 mL silica gel, dry load on celite. Load column with DCM. Eluent: 20% (5%  $\text{Et}_2\text{O}/\text{DCM})/\text{Hex}$ .  $R_f = 0.12$

32.7 mg (**3q**); 84% yield.

**$^1\text{H}$  NMR** (500 MHz,  $\text{CDCl}_3$ )  $\delta$  7.30 – 7.20 (m, 4H), 7.17 (tt,  $J = 7.0, 1.8$  Hz, 1H), 7.13 (td,  $J = 8.2, 2.1$  Hz, 2H), 7.08 (d,  $J = 8.0$  Hz, 2H), 4.51 (t,  $J = 8.1$  Hz, 1H), 3.96 (t,  $J = 6.6$  Hz, 2H), 3.03 (d,  $J = 8.1$  Hz, 2H), 2.29 (s, 3H), 1.46 (p,  $J = 6.8$  Hz, 2H), 1.36 – 1.14 (m, 6H), 0.87 (t,  $J = 7.1$  Hz, 3H).

**$^{13}\text{C}$  NMR** (126 MHz,  $\text{CDCl}_3$ )  $\delta$  172.12, 143.90, 140.67, 136.16, 129.36, 128.65, 127.76, 127.66, 126.57, 64.77, 46.89, 41.09, 31.55, 28.66, 25.63, 22.66, 21.13, 14.17.

**HRMS** (ESI-TOF)  $m/z$ :  $[M+H^+]$  calculated for  $C_{22}H_{28}O_2$ , 325.2168; found, 325.2169.

**IR**:  $\nu$  2937, 2925, 2857, 1732  $cm^{-1}$ .

$[\alpha]_D^{23} = -1.5571$  ( $C = 2.240$ ,  $CHCl_3$ )

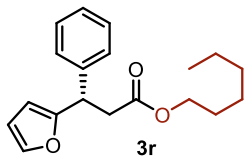

**Hexyl (S)-3-(furan-2-yl)-3-phenylpropanoate**  $C_{19}H_{24}O_3$

**Isolation**: 60 mL silica gel, dry load on celite. Load column with DCM. Eluent: 30% (5%  $Et_2O/DCM$ )/Hex.  $R_f = 0.1$

20.9 mg (**3r**); 58%

yield.

**$^1H$  NMR** (500 MHz,  $CDCl_3$ )  $\delta$  7.33 – 7.28 (m, 4H), 7.25 – 7.20 (m, 2H), 6.28 (dt,  $J = 3.0, 1.4$  Hz, 1H), 6.05 (dt,  $J = 3.1, 1.0$  Hz, 1H), 4.55 (t,  $J = 7.9$  Hz, 1H), 4.00 (t,  $J = 6.7$  Hz, 2H), 3.09 (dd,  $J = 15.5, 7.9$  Hz, 1H), 2.90 (dd,  $J = 15.5, 7.9$  Hz, 1H), 1.53 – 1.47 (m, 2H), 1.33 – 1.19 (m, 6H), 0.88 (t,  $J = 7.1$  Hz, 3H).

**$^{13}C$  NMR** (126 MHz,  $CDCl_3$ )  $\delta$  171.60, 156.40, 141.82, 141.30, 128.73, 127.87, 127.16, 110.22, 105.83, 64.92, 41.61, 39.97, 31.54, 28.65, 25.63, 22.67, 14.16.

**HRMS** (ESI-TOF)  $m/z$ :  $[M+H^+]$  calculated for  $C_{19}H_{24}O_3$ , 323.1623; found, 323.1623.

**IR**:  $\nu$  2956, 2922, 2852, 1733, 1154  $cm^{-1}$ .

$[\alpha]_D^{23} = +41.8023$  ( $C = 2.030$ ,  $CHCl_3$ )

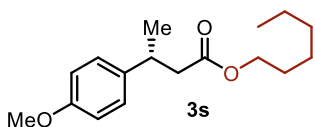

**Hexyl (R)-3-(4-methoxyphenyl)butanoate**  $C_{17}H_{26}O_3$

**Isolation**: 60 mL silica gel, dry load on celite. Load column with DCM. Eluent: 30% (5%  $Et_2O/DCM$ )/Hex.  $R_f = 0.2$

23.4 mg (**3s**); 70% yield.

**$^1H$  NMR** (500 MHz,  $CDCl_3$ )  $\delta$  7.17 – 7.11 (m, 2H), 6.85 – 6.81 (m, 2H), 4.00 (t,  $J = 6.7$  Hz, 2H), 3.78 (s, 3H), 3.23 (h,  $J = 7.2$  Hz, 1H), 2.57 (dd,  $J = 14.9, 7.3$  Hz, 1H), 2.51 (dd,  $J = 14.9, 8.0$  Hz, 1H), 1.57 – 1.49 (m, 2H), 1.32 – 1.20 (m, 9H), 0.88 (t,  $J = 6.9$  Hz, 3H).

$^{13}\text{C}$  NMR (126 MHz,  $\text{CDCl}_3$ )  $\delta$  172.71, 158.20, 138.01, 127.80, 113.97, 64.62, 55.37, 43.42, 35.94, 31.57, 28.72, 25.70, 22.67, 22.22, 14.16.

HRMS (ESI-TOF)  $m/z$ :  $[\text{M}+\text{H}^+]$  calculated for  $\text{C}_{17}\text{H}_{26}\text{O}_3$ , 301.1780; found, 301.1781.

IR:  $\nu$  2956, 2927, 2857, 1732, 1514, 1247  $\text{cm}^{-1}$ .

$[\alpha]_{\text{D}}^{23} = -18.6362$  ( $C = 1.270$ ,  $\text{CHCl}_3$ )

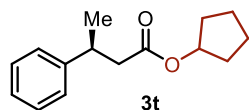

**Cyclopentyl (*R*)-3-phenylbutanoate**  $\text{C}_{15}\text{H}_{20}\text{O}_2$

Isolation: 60 mL silica gel, dry load on celite. Load column with DCM. Eluent: 30% (5%

$\text{Et}_2\text{O}/\text{DCM})/\text{Hex}$ .  $R_f = 0.12$

17.8 mg (**3t**); 64% yield

$^1\text{H}$  NMR (500 MHz,  $\text{CDCl}_3$ )  $\delta$  7.32 – 7.27 (m, 2H), 7.24 – 7.16 (m, 3H), 5.09 (tt,  $J = 6.1, 2.9$  Hz, 1H), 3.25 (h,  $J = 7.2$  Hz, 1H), 2.58 (dd,  $J = 14.8, 7.4$  Hz, 1H), 2.51 (dd,  $J = 14.8, 7.9$  Hz, 1H), 1.81 – 1.71 (m, 2H), 1.66 – 1.47 (m, 6H), 1.29 (d,  $J = 7.0$  Hz, 3H).

$^{13}\text{C}$  NMR (126 MHz,  $\text{CDCl}_3$ )  $\delta$  172.35, 145.87, 128.56, 126.93, 126.49, 43.37, 36.86, 32.73, 32.71, 23.81, 22.12.

HRMS (ESI-TOF)  $m/z$ :  $[\text{M}+\text{H}^+]$  calculated for  $\text{C}_{15}\text{H}_{20}\text{O}_2$ , 255.1361; found, 255.1362.

IR:  $\nu$  2962, 2919, 2873, 2850, 1728  $\text{cm}^{-1}$ .

$[\alpha]_{\text{D}}^{23} = -18.2237$  ( $C = 1.490$ ,  $\text{CHCl}_3$ )

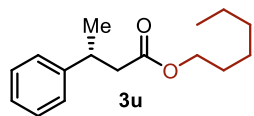

**Hexyl (*R*)-3-phenylbutanoate**  $\text{C}_{16}\text{H}_{24}\text{O}_2$

Isolation: 60 mL silica gel, dry load on celite. Load column with DCM. Eluent: 20% (5%

$\text{Et}_2\text{O}/\text{DCM})/\text{Hex}$ .  $R_f = 0.9$

21.8 mg (**3u**); 73% yield.

$^1\text{H}$  NMR (500 MHz,  $\text{CDCl}_3$ )  $\delta$  7.32 – 7.27 (m, 2H), 7.24 – 7.17 (m, 3H), 4.01 (t,  $J = 6.7$  Hz, 2H), 3.28 (h,  $J = 7.1$  Hz, 1H), 2.62 (dd,  $J = 15.0, 7.0$  Hz, 1H), 2.54 (dd,  $J = 15.0, 8.1$  Hz, 1H), 1.57 – 1.50 (m, 2H), 1.32 – 1.22 (m, 9H), 0.88 (t,  $J = 6.9$  Hz, 3H).

$^{13}\text{C}$  NMR (126 MHz,  $\text{CDCl}_3$ )  $\delta$  172.64, 145.90, 128.61, 126.89, 126.52, 64.65, 43.16, 36.71, 31.56, 28.71, 25.69, 22.67, 22.04, 14.16.

**HRMS** (ESI-TOF)  $m/z$ :  $[\text{M}+\text{H}^+]$  calculated for  $\text{C}_{16}\text{H}_{24}\text{O}_2$ , 271.1674; found, 271.1685.

**IR**:  $\nu$  2956, 2930, 2858, 1733, 1165  $\text{cm}^{-1}$ .

$[\alpha]_{\text{D}}^{23} = -18.1065$  ( $C = 1.340$ ,  $\text{CHCl}_3$ )

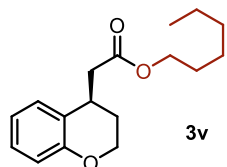

**Hexyl (R)-2-(chroman-4-yl)acetate**  $\text{C}_{17}\text{H}_{24}\text{O}_3$

**Isolation**: 60 mL silica gel, dry load on celite. Load column with DCM. Eluent: 30% (5%  $\text{Et}_2\text{O}/\text{DCM}$ )/Hex.  $R_f = 0.1$

21.6 mg (**3v**); 65% yield.

$^1\text{H}$  NMR (500 MHz,  $\text{CDCl}_3$ )  $\delta$  7.14 – 7.08 (m, 2H), 6.86 (td,  $J = 7.5, 1.3$  Hz, 1H), 6.80 (dd,  $J = 8.1, 1.3$  Hz, 1H), 4.23 – 4.14 (m, 2H), 4.12 (td,  $J = 6.8, 0.9$  Hz, 2H), 3.36 (dq,  $J = 10.3, 5.2$  Hz, 1H), 2.80 (dd,  $J = 15.5, 4.8$  Hz, 1H), 2.53 (dd,  $J = 15.5, 10.0$  Hz, 1H), 2.16 (dddd,  $J = 14.3, 8.7, 5.8, 4.2$  Hz, 1H), 1.85 (dtd,  $J = 14.0, 5.4, 3.2$  Hz, 1H), 1.64 (dq,  $J = 8.1, 6.7$  Hz, 2H), 1.39 – 1.23 (m, 6H), 0.90 (t,  $J = 7.0$  Hz, 3H).

$^{13}\text{C}$  NMR (126 MHz,  $\text{CDCl}_3$ )  $\delta$  172.39, 154.69, 128.86, 127.97, 124.75, 120.54, 117.21, 64.99, 63.34, 41.55, 31.56, 30.68, 28.74, 27.52, 25.75, 22.69, 14.15.

**HRMS** (ESI-TOF)  $m/z$ :  $[\text{M}+\text{H}^+]$  calculated for  $\text{C}_{17}\text{H}_{24}\text{O}_3$ , 299.1623; found, 299.1633.

**IR**:  $\nu$  2938, 2926, 2857, 1731, 1224, 1162  $\text{cm}^{-1}$ .

$[\alpha]_{\text{D}}^{23} = -5.9385$  ( $C = 1.800$ ,  $\text{CHCl}_3$ )

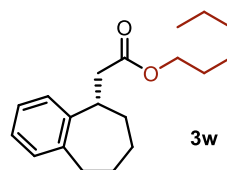

**Hexyl (S)-2-(6,7,8,9-tetrahydro-5H-benzo[7]annulen-5-yl)acetate**  $\text{C}_{19}\text{H}_{28}\text{O}_2$

**Isolation**: 60 mL silica gel, dry load on celite. Load column with DCM. Eluent: 10% (5%  $\text{Et}_2\text{O}/\text{DCM}$ )/Hex.  $R_f = 0.1$

29.1 mg (**3w**); 84% yield.

**<sup>1</sup>H NMR** (500 MHz, CDCl<sub>3</sub>) δ 7.17 – 7.04 (m, 4H), 4.06 (t, *J* = 6.7 Hz, 2H), 3.52 – 3.43 (m, 1H), 2.95 – 2.87 (m, 1H), 2.86 – 2.82 (m, 1H), 2.80 (dd, *J* = 15.1, 6.7 Hz, 1H), 2.70 (dd, *J* = 15.1, 8.9 Hz, 1H), 1.96 – 1.84 (m, 1H), 1.83 – 1.69 (m, 3H), 1.65 – 1.47 (m, 4H), 1.38 – 1.19 (m, 6H), 0.89 (t, *J* = 6.8 Hz, 3H).

**<sup>13</sup>C NMR** (126 MHz, CDCl<sub>3</sub>) δ 173.08, 144.07, 142.71, 129.87, 126.37, 126.24, 64.71, 40.82, 38.84, 36.17, 33.51, 31.56, 29.86, 28.74, 27.95, 25.73, 22.69, 14.15.

**HRMS** (ESI-TOF) *m/z*: [M+H<sup>+</sup>] calculated for C<sub>19</sub>H<sub>28</sub>O<sub>2</sub>, 289.2168; found, 289.2161.

**IR**: ν 2922, 2853, 1733 cm<sup>-1</sup>.

[α]<sub>D</sub><sup>23</sup> = +10.8212 (*C* = 1.160, CHCl<sub>3</sub>)

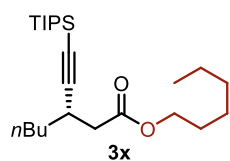

**Hexyl (S)-3-((triisopropylsilyl)ethynyl)heptanoate** C<sub>24</sub>H<sub>46</sub>O<sub>2</sub>Si

**Isolation**: 60 mL silica gel, dry load on celite. Load column with DCM. Eluent: 20% (5% Et<sub>2</sub>O/DCM)/Hex. **R<sub>f</sub>** = 0.3

33.3 mg (3x); 70% yield

**<sup>1</sup>H NMR** (500 MHz, CDCl<sub>3</sub>) δ 4.07 (td, *J* = 6.8, 1.6 Hz, 2H), 2.94 – 2.84 (m, 1H), 2.53 (dd, *J* = 15.2, 7.7 Hz, 1H), 2.43 (dd, *J* = 15.2, 7.2 Hz, 1H), 1.61 (dt, *J* = 8.3, 6.8 Hz, 2H), 1.55 – 1.39 (m, 5H), 1.39 – 1.24 (m, 9H), 1.06 – 1.03 (m, 18H), 1.01 – 0.97 (m, 1H), 0.89 (td, *J* = 7.2, 2.7 Hz, 6H).

**<sup>13</sup>C NMR** (126 MHz, CDCl<sub>3</sub>) δ 171.84, 110.62, 81.66, 64.88, 40.74, 34.47, 31.61, 29.49, 29.42, 28.74, 25.77, 22.69, 22.49, 18.75, 14.16, 14.14, 11.37.

**HRMS** (ESI-TOF) *m/z*: [M+H<sup>+</sup>] calculated for C<sub>24</sub>H<sub>47</sub>O<sub>2</sub>Si, 395.3345; found, 395.3353.

**IR**: ν 2929, 2864, 2167, 1739, 1463, 1162 cm<sup>-1</sup>.

[α]<sub>D</sub><sup>22</sup> = 0.3253 (*C* = 1.750, CHCl<sub>3</sub>)

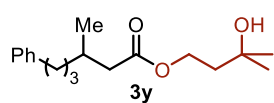

**3-hydroxy-3-methylbutyl (S)-3-methyl-6-phenylhexanoate** C<sub>18</sub>H<sub>28</sub>O<sub>3</sub>

**Isolation**: 60 mL silica gel, dry load on celite. Eluent: (10% to 20%) EtOAc/Hex. **R<sub>f</sub>** = 0.3

26.0 mg (3y); 74% yield.

**<sup>1</sup>H NMR** (500 MHz, CDCl<sub>3</sub>) δ 7.30 – 7.27 (m, 2H), 7.20 – 7.15 (m, 3H), 4.24 (t, *J* = 6.9 Hz, 2H), 2.59 (ddd, *J* = 8.4, 6.8, 3.7 Hz, 2H), 2.29 (dd, *J* = 14.7, 6.0 Hz, 1H), 2.11 (dd, *J* = 14.8, 8.1 Hz, 1H), 1.98 (dq, *J* = 14.0, 7.2 Hz, 1H), 1.82 (t, *J* = 6.8 Hz, 2H), 1.72 – 1.56 (m, 2H), 1.56 – 1.53 (m, 2H), 1.37 (ddt, *J* = 13.4, 10.8, 5.6 Hz, 1H), 1.26 (s, 6H), 0.94 (d, *J* = 6.7 Hz, 3H).

**<sup>13</sup>C NMR** (126 MHz, CDCl<sub>3</sub>) δ 173.30, 142.64, 128.51, 128.42, 125.83, 70.21, 61.37, 42.05, 41.73, 36.45, 36.16, 30.43, 29.79, 28.98, 19.86.

**HRMS** (ESI-TOF) *m/z*: [M+H<sup>+</sup>] calculated for C<sub>18</sub>H<sub>28</sub>O<sub>3</sub>Na, 315.1936; found, 315.1929.

**IR**: ν 3442 (br), 2966, 2930, 2855, 1732, 1148 cm<sup>-1</sup>.

## D. HPLC Traces of Isolated Esters

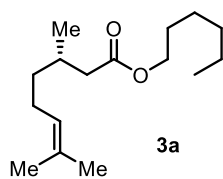

Saponified to citronellic acid, 1%(0.2%TFA/0.1%DEA/5%THF/Hex)/0.3%IPA/Hex, CHIRALPAK IC-

**3, 96.5:3.5 e.r.**

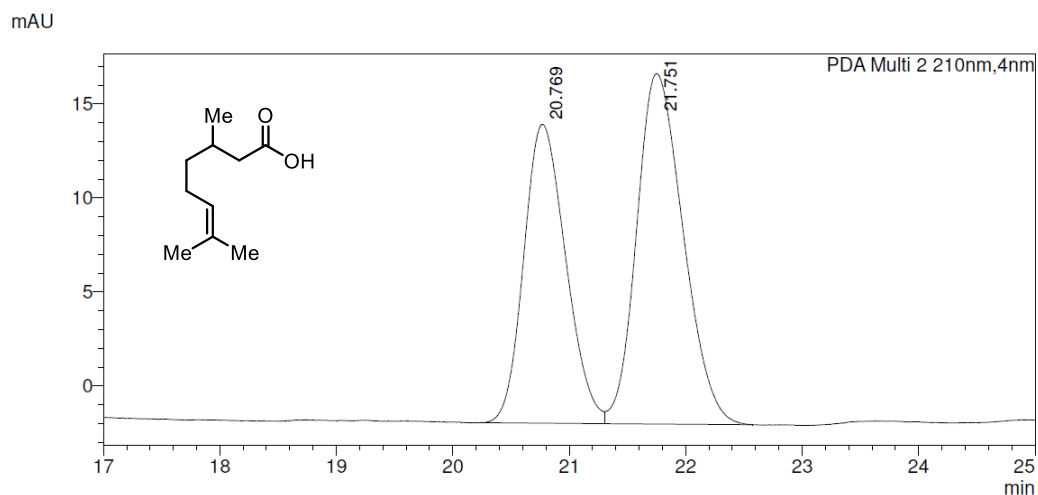

| PDA Ch2 210nm |           |        |         |        |         |
|---------------|-----------|--------|---------|--------|---------|
| Peak#         | Ret. Time | Area   | Area%   | Height | Height% |
| 1             | 20.769    | 398717 | 43.456  | 15904  | 46.029  |
| 2             | 21.751    | 518801 | 56.544  | 18649  | 53.971  |
| Total         |           | 917518 | 100.000 | 34553  | 100.000 |

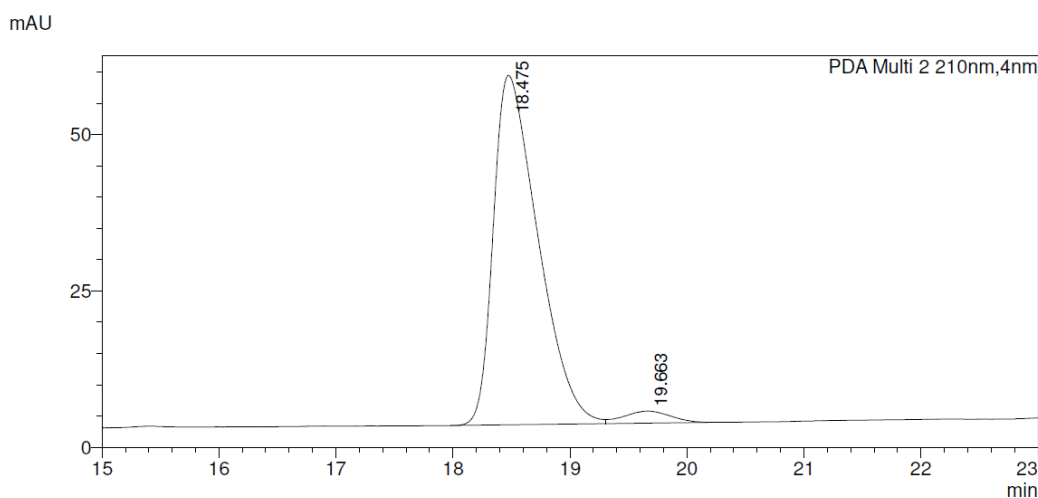

| PDA Ch2 210nm |           |         |         |        |         |
|---------------|-----------|---------|---------|--------|---------|
| Peak#         | Ret. Time | Area    | Area%   | Height | Height% |
| 1             | 18.475    | 1482133 | 96.509  | 55810  | 96.665  |
| 2             | 19.663    | 53606   | 3.491   | 1926   | 3.335   |
| Total         |           | 1535739 | 100.000 | 57736  | 100.000 |

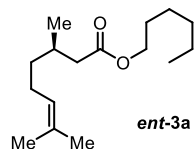

Saponified to citronellic acid, 1%(0.2%TFA/0.1%DEA/5%THF/Hex)/0.3%IPA/Hex, CHIRALPAK IC-3,

**90.0:10.0 e.r. (95.9:4.1 e.s.)**

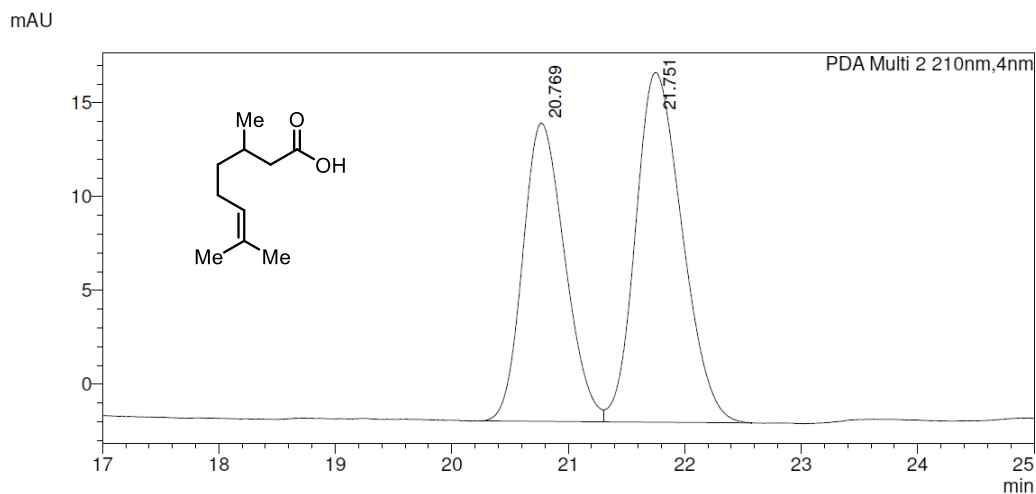

| PDA Ch2 210nm |           |        |         |        |         |
|---------------|-----------|--------|---------|--------|---------|
| Peak#         | Ret. Time | Area   | Area%   | Height | Height% |
| 1             | 20.769    | 398717 | 43.456  | 15904  | 46.029  |
| 2             | 21.751    | 518801 | 56.544  | 18649  | 53.971  |
| Total         |           | 917518 | 100.000 | 34553  | 100.000 |

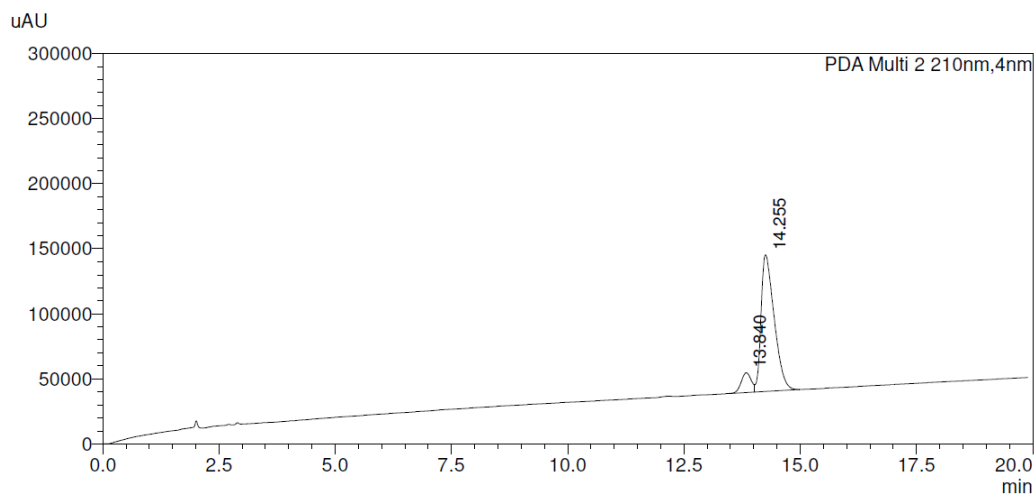

| PDA Ch2 210nm |           |         |        |         |         |
|---------------|-----------|---------|--------|---------|---------|
| Peak#         | Ret. Time | Area    | Height | Height% | Area%   |
| 1             | 13.840    | 228917  | 15171  | 12.623  | 9.982   |
| 2             | 14.255    | 2064322 | 105013 | 87.377  | 90.018  |
| Total         |           | 2293239 | 120183 | 100.000 | 100.000 |



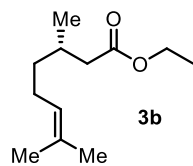

Saponified to citronellic acid, 1%(0.2%TFA/0.1%DEA/5%THF/Hex)/0.3%IPA/Hex, CHIRALPAK IC-3,

**97.9:2.1 e.r.**

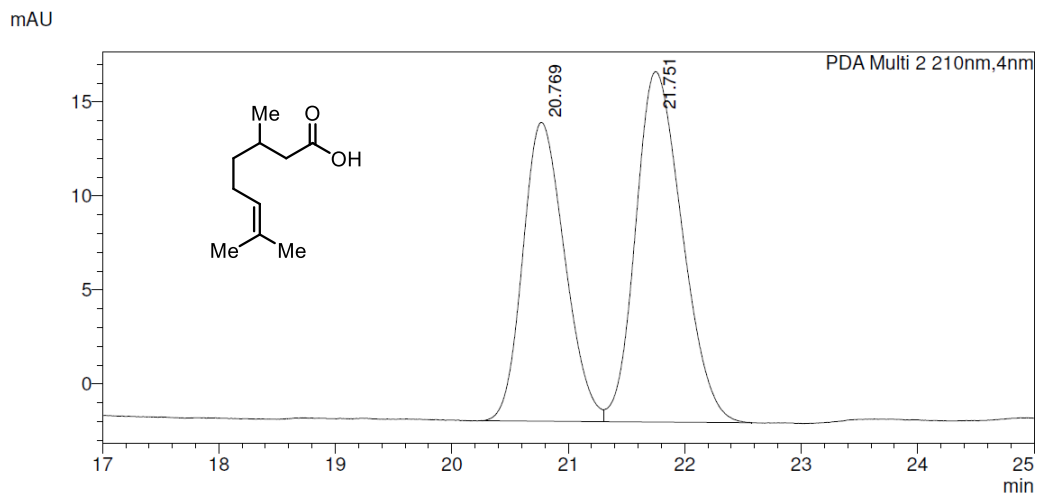

| PDA Ch2 210nm |           |        |         |        |         |
|---------------|-----------|--------|---------|--------|---------|
| Peak#         | Ret. Time | Area   | Area%   | Height | Height% |
| 1             | 20.769    | 398717 | 43.456  | 15904  | 46.029  |
| 2             | 21.751    | 518801 | 56.544  | 18649  | 53.971  |
| Total         |           | 917518 | 100.000 | 34553  | 100.000 |

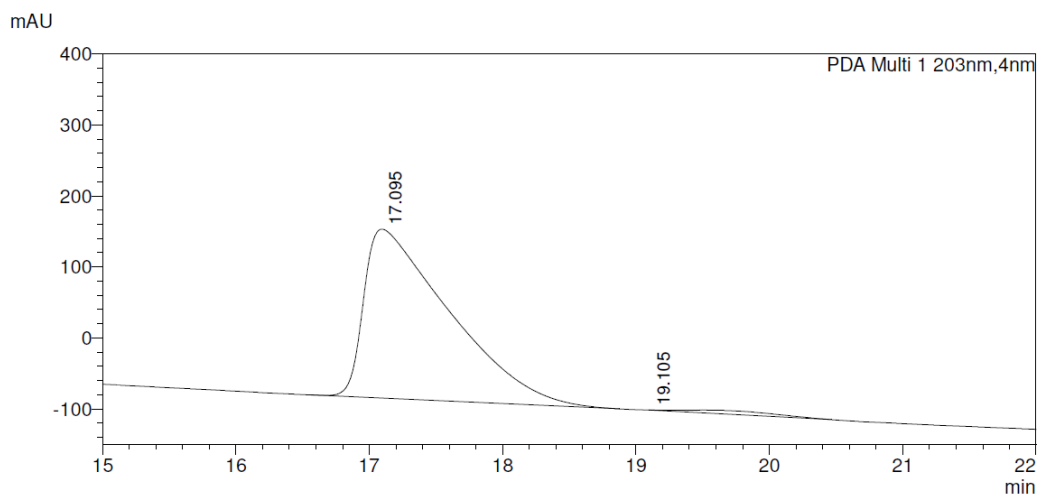

| PDA Ch1 203nm |           |          |         |        |         |
|---------------|-----------|----------|---------|--------|---------|
| Peak#         | Ret. Time | Area     | Area%   | Height | Height% |
| 1             | 17.095    | 10613495 | 97.874  | 237961 | 99.976  |
| 2             | 19.105    | 230590   | 2.126   | 57     | 0.024   |
| Total         |           | 10844085 | 100.000 | 238018 | 100.000 |

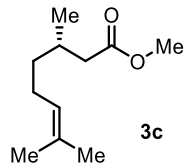

Saponified to citronellic acid, 1%(0.2%TFA/0.1%DEA/5%THF/Hex)/0.3%IPA/Hex, CHIRALPAK IC-3

**96.2 : 3.8 e.r.**

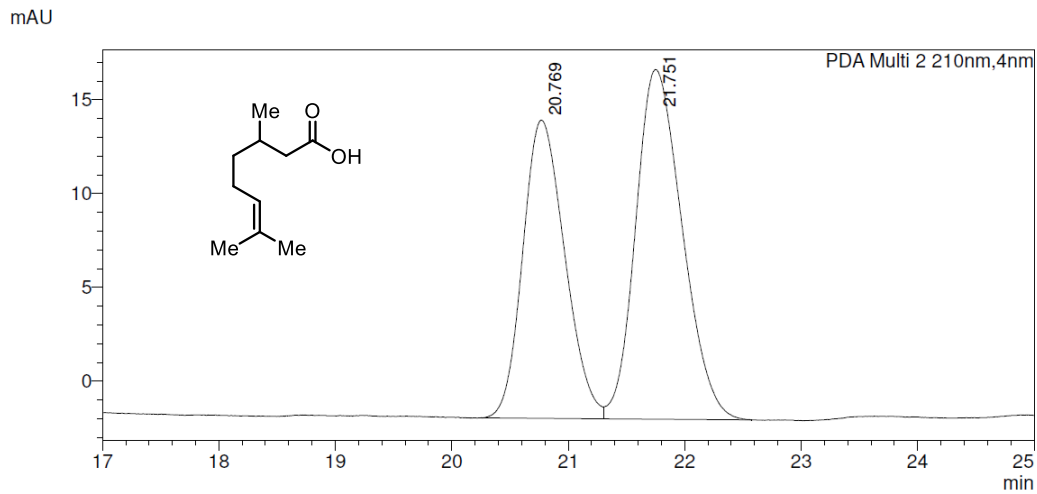

| PDA Ch2 210nm |           |        |         |        |         |
|---------------|-----------|--------|---------|--------|---------|
| Peak#         | Ret. Time | Area   | Area%   | Height | Height% |
| 1             | 20.769    | 398717 | 43.456  | 15904  | 46.029  |
| 2             | 21.751    | 518801 | 56.544  | 18649  | 53.971  |
| Total         |           | 917518 | 100.000 | 34553  | 100.000 |

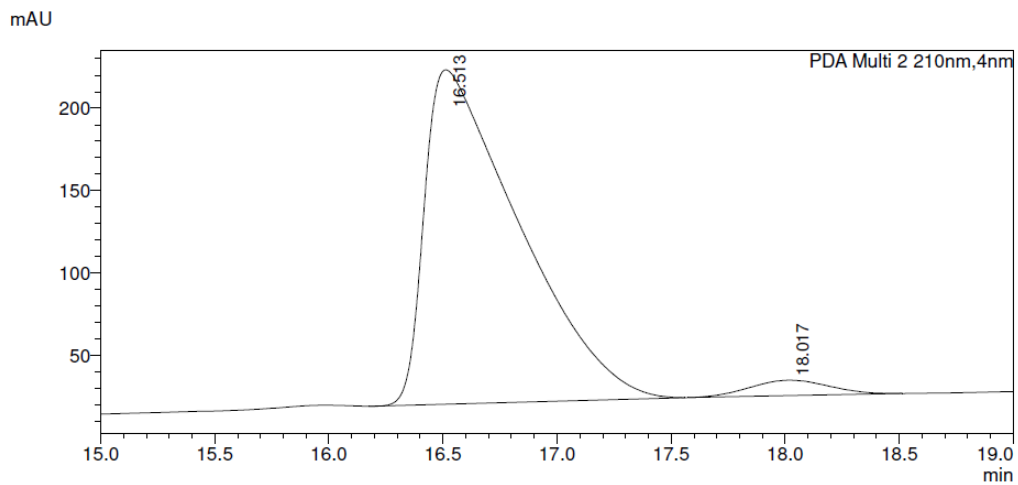

| PDA Ch2 210nm |           |         |         |        |         |
|---------------|-----------|---------|---------|--------|---------|
| Peak#         | Ret. Time | Area    | Area%   | Height | Height% |
| 1             | 16.513    | 5831210 | 96.244  | 202690 | 95.560  |
| 2             | 18.017    | 227589  | 3.756   | 9418   | 4.440   |
| Total         |           | 6058798 | 100.000 | 212108 | 100.000 |

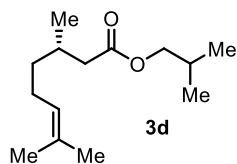

Saponified to citronellic acid, 1%(0.2%TFA/0.1%DEA/5%THF/Hex)/0.3%IPA/Hex, CHIRALPAK IC-3,

**96.7:3.3 e.r.**

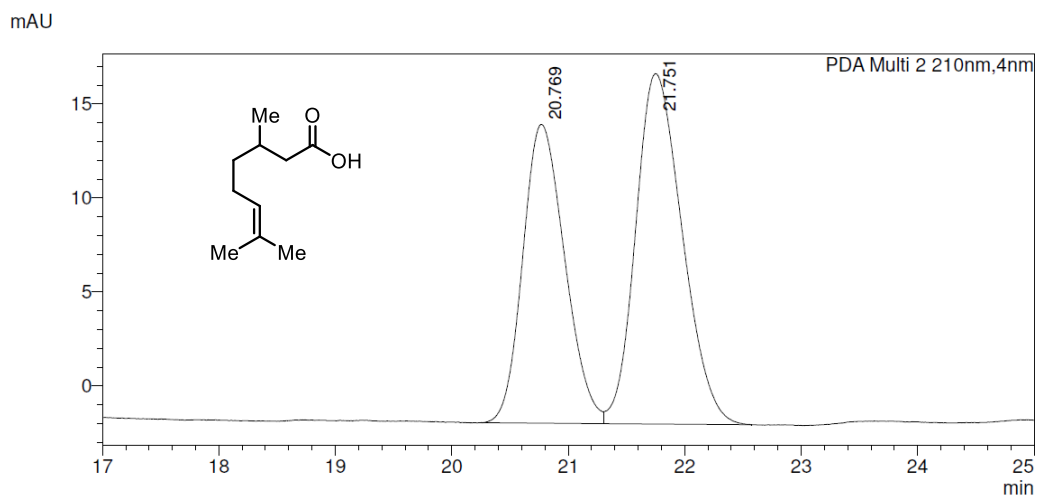

| PDA Ch2 210nm |           |        |         |        |         |
|---------------|-----------|--------|---------|--------|---------|
| Peak#         | Ret. Time | Area   | Area%   | Height | Height% |
| 1             | 20.769    | 398717 | 43.456  | 15904  | 46.029  |
| 2             | 21.751    | 518801 | 56.544  | 18649  | 53.971  |
| Total         |           | 917518 | 100.000 | 34553  | 100.000 |

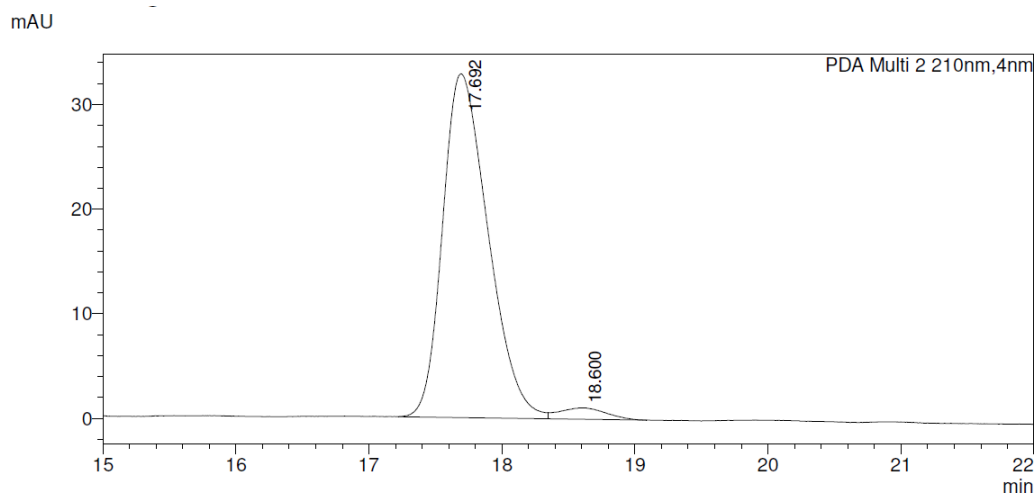

| PDA Ch2 210nm |           |        |         |        |         |
|---------------|-----------|--------|---------|--------|---------|
| Peak#         | Ret. Time | Area   | Area%   | Height | Height% |
| 1             | 17.692    | 780574 | 96.700  | 32842  | 96.818  |
| 2             | 18.600    | 26636  | 3.300   | 1079   | 3.182   |
| Total         |           | 807210 | 100.000 | 33921  | 100.000 |

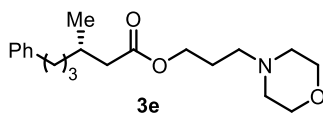

1%(0.2%TFA/0.1%DEA/5%THF/Hex)/0.3% IPA/Hex, 0.8 mL/min, CHIRALPAK IA-3

**99.9 : 0.1 e.r.**

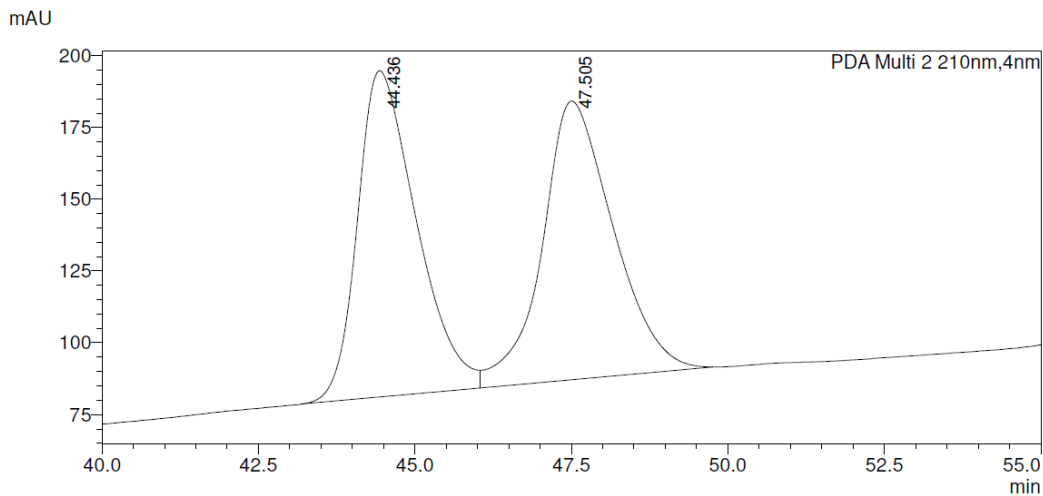

| PDA Ch2 210nm |           |          |         |        |         |
|---------------|-----------|----------|---------|--------|---------|
| Peak#         | Ret. Time | Area     | Area%   | Height | Height% |
| 1             | 44.436    | 7434789  | 49.190  | 113601 | 53.930  |
| 2             | 47.505    | 7679628  | 50.810  | 97046  | 46.070  |
| Total         |           | 15114417 | 100.000 | 210647 | 100.000 |

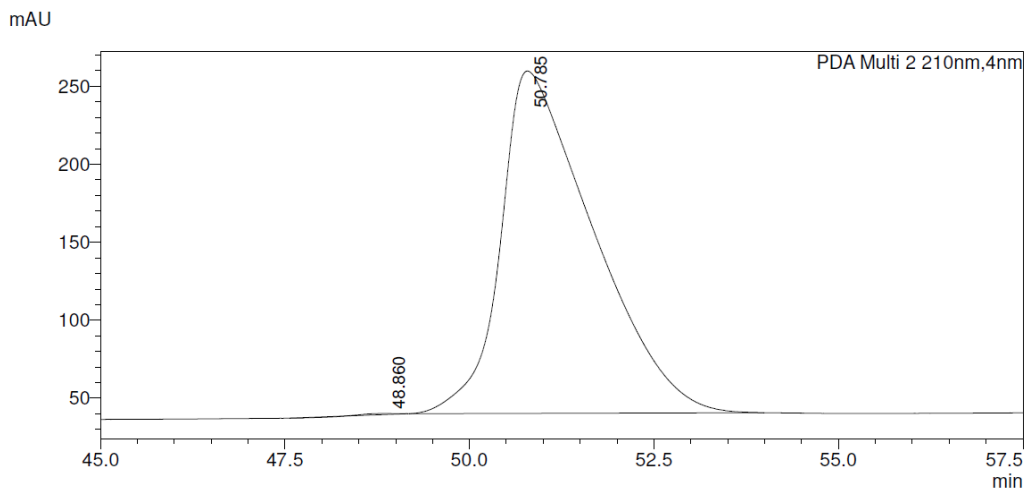

| PDA Ch2 210nm |           |          |         |        |         |
|---------------|-----------|----------|---------|--------|---------|
| Peak#         | Ret. Time | Area     | Area%   | Height | Height% |
| 1             | 48.860    | 16343    | 0.085   | 706    | 0.321   |
| 2             | 50.785    | 19233423 | 99.915  | 219562 | 99.679  |
| Total         |           | 19249766 | 100.000 | 220268 | 100.000 |

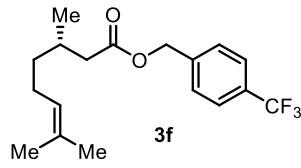

Saponified to citronellic acid, 1%(0.2%TFA/0.1%DEA/5%THF/Hex)/0.3%IPA/Hex, CHIRALPAK IC-3,

96.5:3.5 e.r.

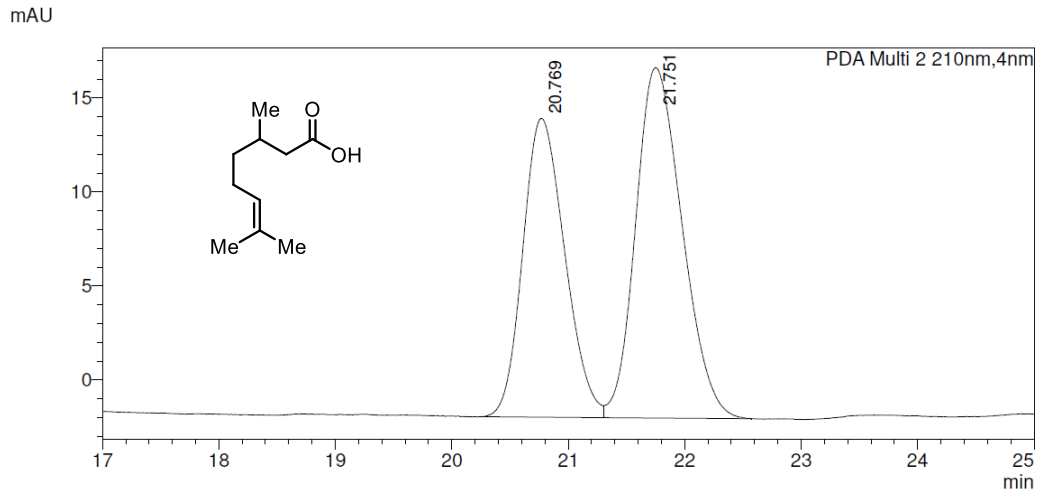

| PDA Ch2 210nm |           |        |         |        |         |
|---------------|-----------|--------|---------|--------|---------|
| Peak#         | Ret. Time | Area   | Area%   | Height | Height% |
| 1             | 20.769    | 398717 | 43.456  | 15904  | 46.029  |
| 2             | 21.751    | 518801 | 56.544  | 18649  | 53.971  |
| Total         |           | 917518 | 100.000 | 34553  | 100.000 |

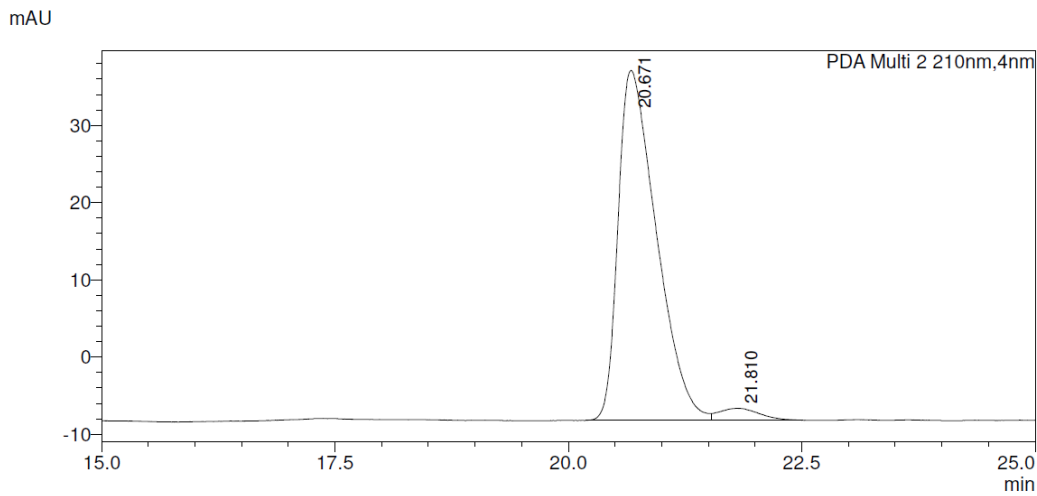

| PDA Ch2 210nm |           |         |         |        |         |
|---------------|-----------|---------|---------|--------|---------|
| Peak#         | Ret. Time | Area    | Area%   | Height | Height% |
| 1             | 20.671    | 1295084 | 96.489  | 45343  | 96.675  |
| 2             | 21.810    | 47130   | 3.511   | 1559   | 3.325   |
| Total         |           | 1342214 | 100.000 | 46902  | 100.000 |

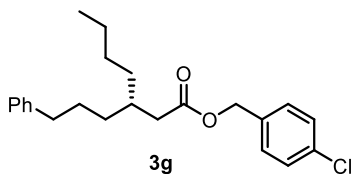

Saponified to carboxylic acid, **97.6:2.4 e.r.**

60%[1%(0.2%TFA/0.1%DEA/5%THF/Hex)/0.3%IPA/Hex]/40%Hex, CHIRALPAK IA-3

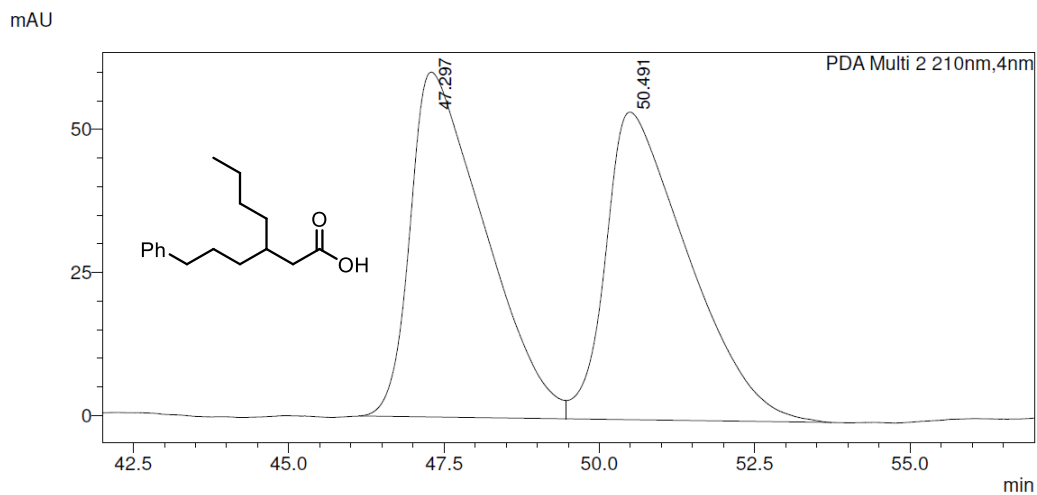

| PDA Ch2 210nm |           |          |         |        |         |
|---------------|-----------|----------|---------|--------|---------|
| Peak#         | Ret. Time | Area     | Area%   | Height | Height% |
| 1             | 47.297    | 5024968  | 50.244  | 60259  | 52.849  |
| 2             | 50.491    | 4976235  | 49.756  | 53763  | 47.151  |
| Total         |           | 10001202 | 100.000 | 114022 | 100.000 |

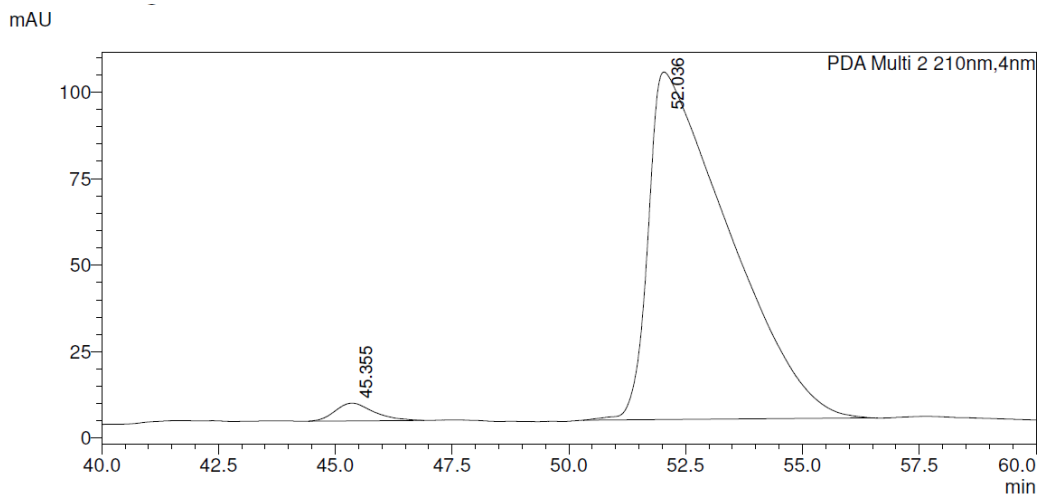

| PDA Ch2 210nm |           |          |         |        |         |
|---------------|-----------|----------|---------|--------|---------|
| Peak#         | Ret. Time | Area     | Area%   | Height | Height% |
| 1             | 45.355    | 292202   | 2.375   | 5121   | 4.858   |
| 2             | 52.036    | 12013123 | 97.625  | 100287 | 95.142  |
| Total         |           | 12305325 | 100.000 | 105408 | 100.000 |

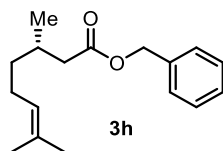

Saponified to citronellic acid, 1%(0.2%TFA/0.1%DEA/5%THF/Hex)/0.3%IPA/Hex, CHIRALPAK IC-3,

**96.6:3.4 e.r.**

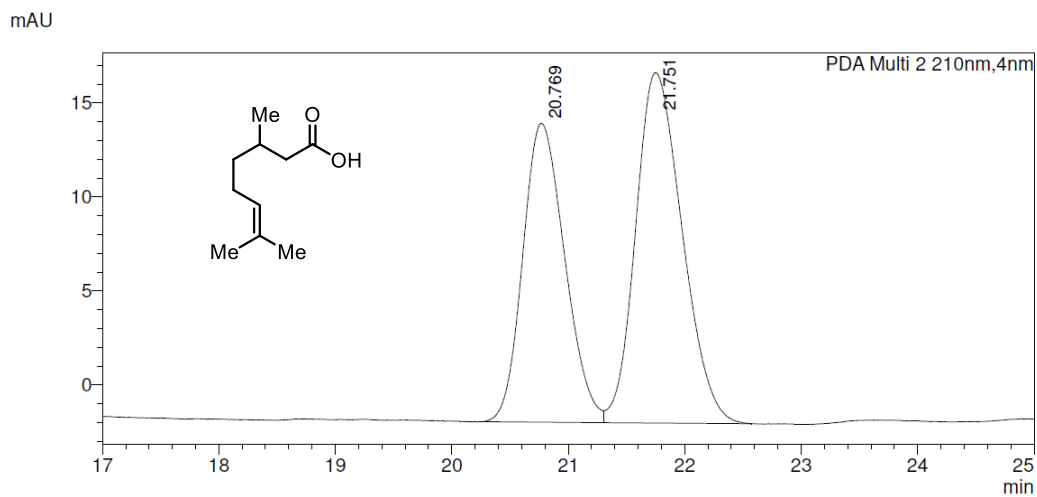

| PDA Ch2 210nm |           |        |         |        |         |
|---------------|-----------|--------|---------|--------|---------|
| Peak#         | Ret. Time | Area   | Area%   | Height | Height% |
| 1             | 20.769    | 398717 | 43.456  | 15904  | 46.029  |
| 2             | 21.751    | 518801 | 56.544  | 18649  | 53.971  |
| Total         |           | 917518 | 100.000 | 34553  | 100.000 |

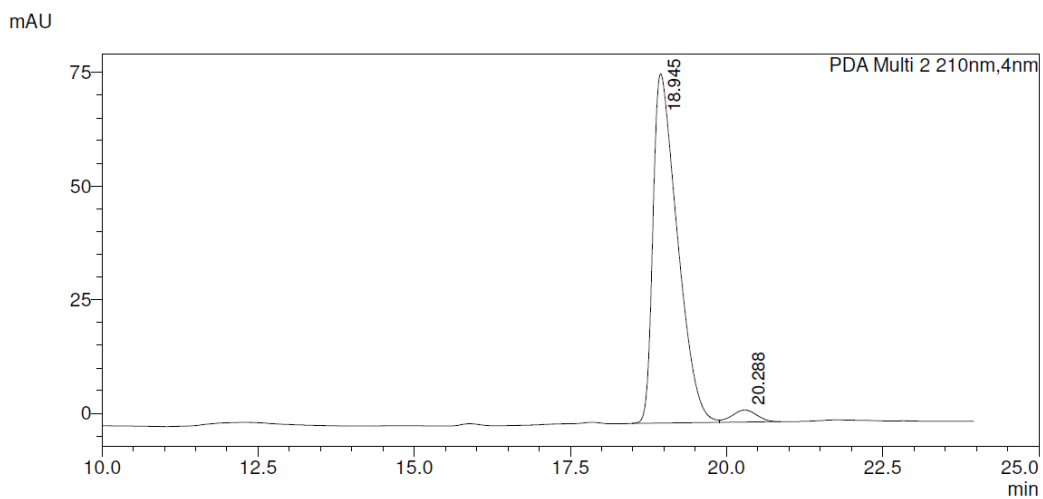

| PDA Ch2 210nm |           |         |         |        |         |
|---------------|-----------|---------|---------|--------|---------|
| Peak#         | Ret. Time | Area    | Area%   | Height | Height% |
| 1             | 18.945    | 2087235 | 96.620  | 76769  | 96.643  |
| 2             | 20.288    | 73026   | 3.380   | 2667   | 3.357   |
| Total         |           | 2160261 | 100.000 | 79436  | 100.000 |

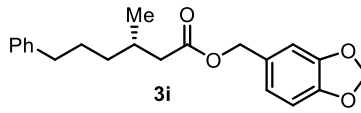

2.5%(0.2%TFA/0.1%DEA/5%EtOH/Hex)97.5%Hex, CHIRALPAK IC-3

**97.7:2.3 e.r.**

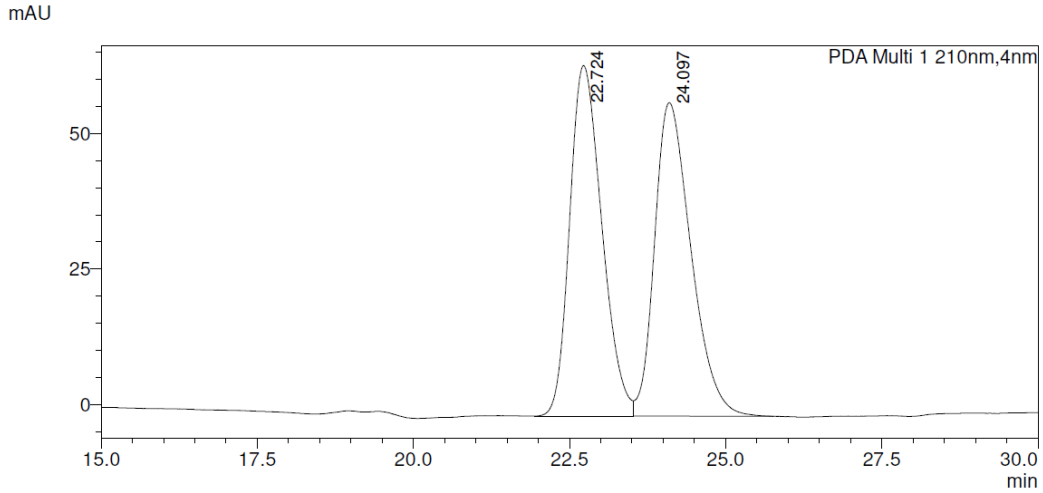

| PDA Ch1 210nm |           |         |         |        |         |
|---------------|-----------|---------|---------|--------|---------|
| Peak#         | Ret. Time | Area    | Area%   | Height | Height% |
| 1             | 22.724    | 2320117 | 49.725  | 64589  | 52.785  |
| 2             | 24.097    | 2345734 | 50.275  | 57773  | 47.215  |
| Total         |           | 4665851 | 100.000 | 122362 | 100.000 |

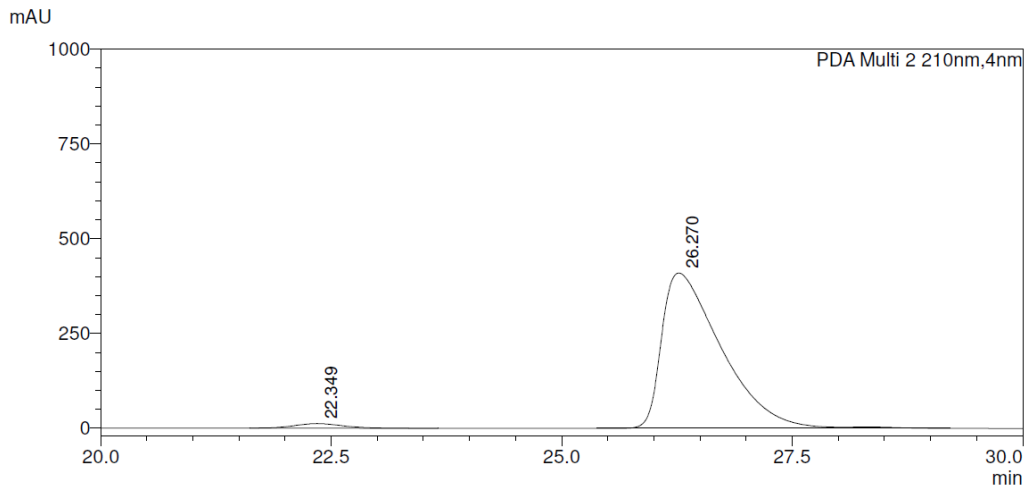

| PDA Ch2 210nm |           |          |         |        |         |
|---------------|-----------|----------|---------|--------|---------|
| Peak#         | Ret. Time | Area     | Area%   | Height | Height% |
| 1             | 22.349    | 429953   | 2.271   | 11863  | 2.813   |
| 2             | 26.270    | 18499587 | 97.729  | 409831 | 97.187  |
| Total         |           | 18929540 | 100.000 | 421694 | 100.000 |



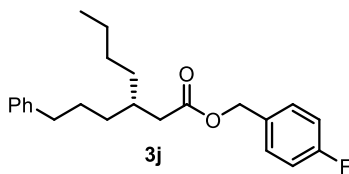

Saponified to carboxylic acid, **99.7:0.3 e.r.**

60%[1%(0.2%TFA/0.1%DEA/5%THF/Hex)/0.3%IPA/Hex]/40%Hex, CHIRALPAK IA-3

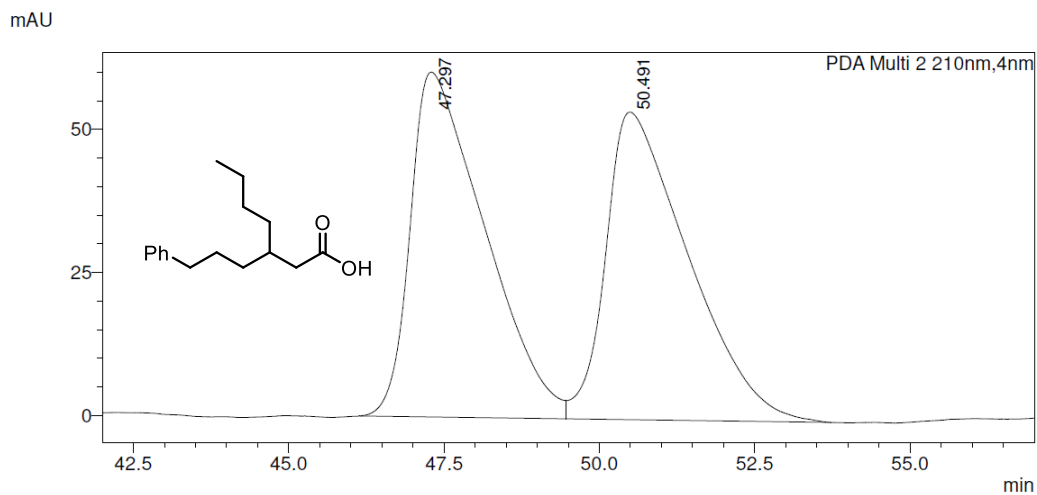

| PDA Ch2 210nm |           |          |         |        |         |
|---------------|-----------|----------|---------|--------|---------|
| Peak#         | Ret. Time | Area     | Area%   | Height | Height% |
| 1             | 47.297    | 5024968  | 50.244  | 60259  | 52.849  |
| 2             | 50.491    | 4976235  | 49.756  | 53763  | 47.151  |
| Total         |           | 10001202 | 100.000 | 114022 | 100.000 |

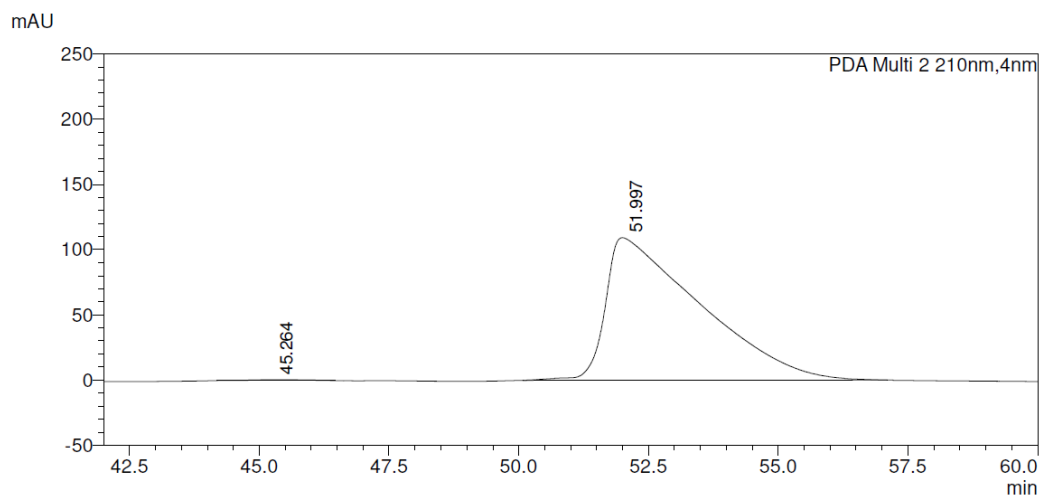

| PDA Ch2 210nm |           |          |         |        |         |
|---------------|-----------|----------|---------|--------|---------|
| Peak#         | Ret. Time | Area     | Area%   | Height | Height% |
| 1             | 45.264    | 44358    | 0.320   | 596    | 0.542   |
| 2             | 51.997    | 13838175 | 99.680  | 109311 | 99.458  |
| Total         |           | 13882534 | 100.000 | 109907 | 100.000 |

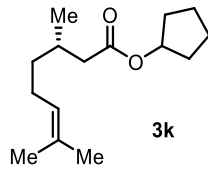

Saponified to citronellic acid, 1%(0.2%TFA/0.1%DEA/5%THF/Hex)/0.3%IPA/Hex, CHIRALPAK IC-3,

**96.1:3.9 e.r.**

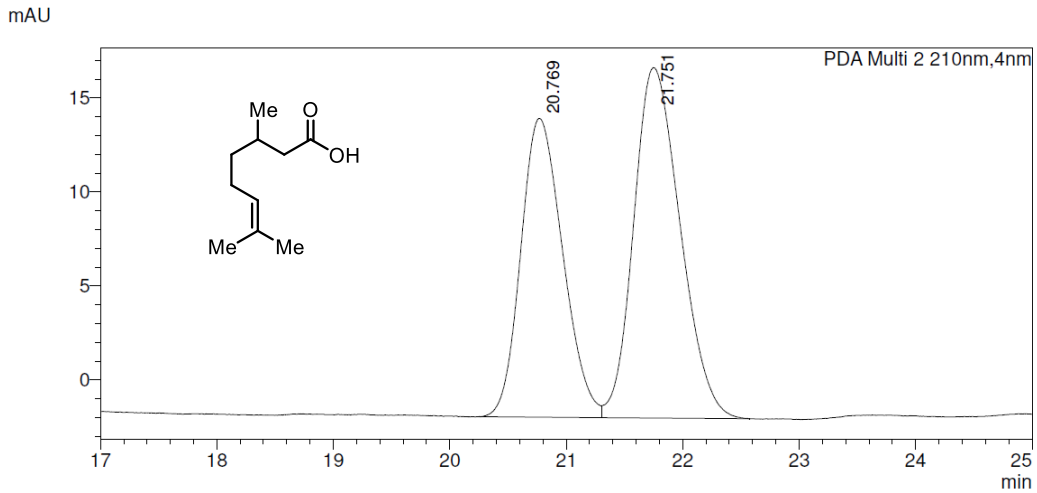

| PDA Ch2 210nm |           |        |         |        |         |
|---------------|-----------|--------|---------|--------|---------|
| Peak#         | Ret. Time | Area   | Area%   | Height | Height% |
| 1             | 20.769    | 398717 | 43.456  | 15904  | 46.029  |
| 2             | 21.751    | 518801 | 56.544  | 18649  | 53.971  |
| Total         |           | 917518 | 100.000 | 34553  | 100.000 |

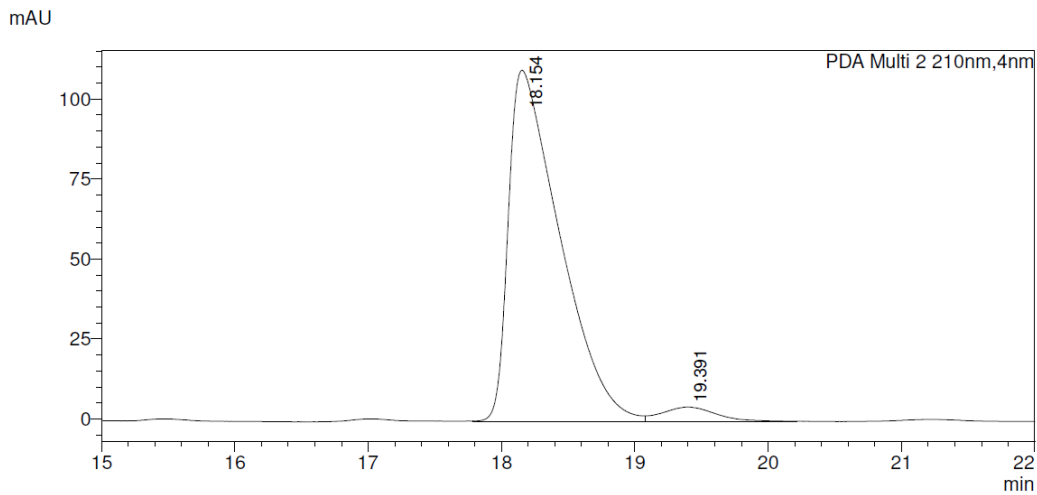

| PDA Ch2 210nm |           |         |         |        |         |
|---------------|-----------|---------|---------|--------|---------|
| Peak#         | Ret. Time | Area    | Area%   | Height | Height% |
| 1             | 18.154    | 2940043 | 95.988  | 109630 | 96.128  |
| 2             | 19.391    | 122869  | 4.012   | 4415   | 3.872   |
| Total         |           | 3062912 | 100.000 | 114045 | 100.000 |

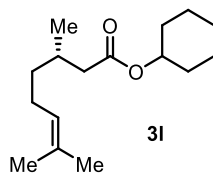

Saponified to citronellic acid, 1%(0.2%TFA/0.1%DEA/5%THF/Hex)/0.3%IPA/Hex, CHIRALPAK IC-3,

**95.7:4.3 e.r.**

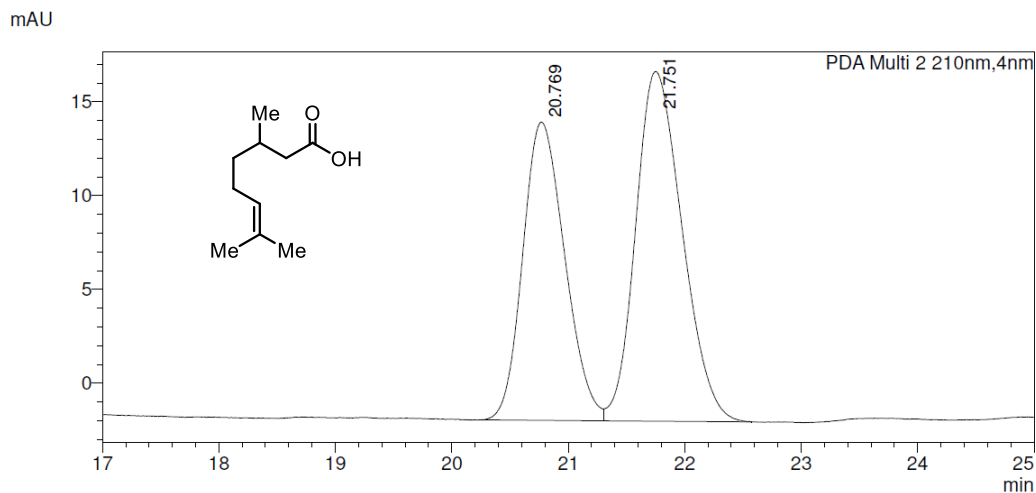

| PDA Ch2 210nm |           |        |         |        |         |
|---------------|-----------|--------|---------|--------|---------|
| Peak#         | Ret. Time | Area   | Area%   | Height | Height% |
| 1             | 20.769    | 398717 | 43.456  | 15904  | 46.029  |
| 2             | 21.751    | 518801 | 56.544  | 18649  | 53.971  |
| Total         |           | 917518 | 100.000 | 34553  | 100.000 |

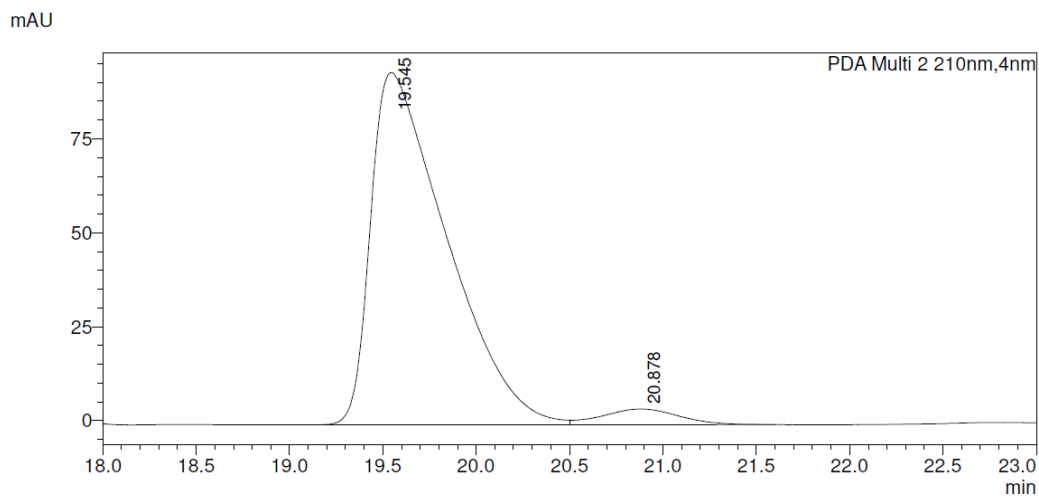

| PDA Ch2 210nm |           |         |         |        |         |
|---------------|-----------|---------|---------|--------|---------|
| Peak#         | Ret. Time | Area    | Area%   | Height | Height% |
| 1             | 19.545    | 2656751 | 95.657  | 93715  | 95.698  |
| 2             | 20.878    | 120620  | 4.343   | 4213   | 4.302   |
| Total         |           | 2777371 | 100.000 | 97928  | 100.000 |

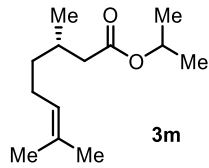

Saponified to citronellic acid, 1%(0.2%TFA/0.1%DEA/5%THF/Hex)/0.3%IPA/Hex, CHIRALPAK IC-3,

**95.5 : 4.5 e.r.**

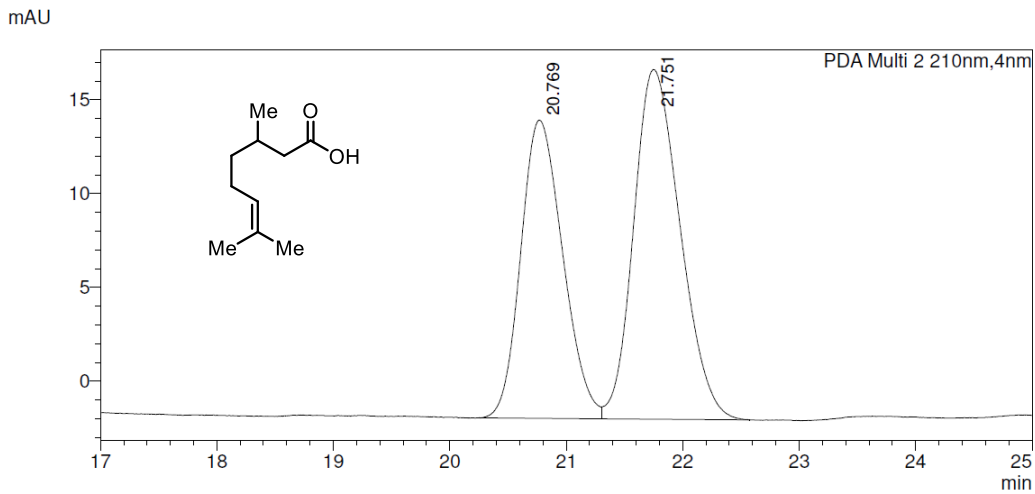

| PDA Ch2 210nm |           |        |         |        |         |
|---------------|-----------|--------|---------|--------|---------|
| Peak#         | Ret. Time | Area   | Area%   | Height | Height% |
| 1             | 20.769    | 398717 | 43.456  | 15904  | 46.029  |
| 2             | 21.751    | 518801 | 56.544  | 18649  | 53.971  |
| Total         |           | 917518 | 100.000 | 34553  | 100.000 |

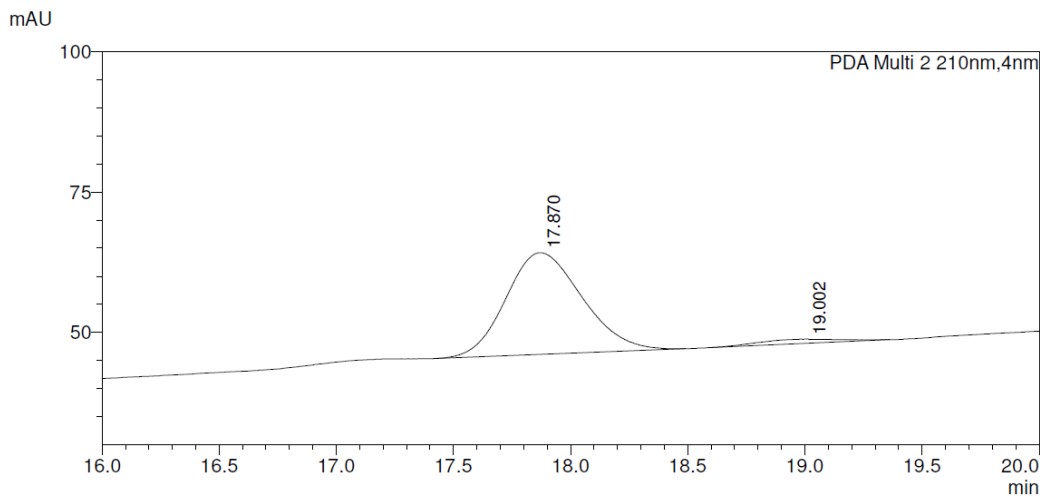

| PDA Ch2 210nm |           |        |         |        |         |
|---------------|-----------|--------|---------|--------|---------|
| Peak#         | Ret. Time | Area   | Area%   | Height | Height% |
| 1             | 17.870    | 410456 | 95.490  | 18116  | 95.979  |
| 2             | 19.002    | 19385  | 4.510   | 759    | 4.021   |
| Total         |           | 429842 | 100.000 | 18875  | 100.000 |

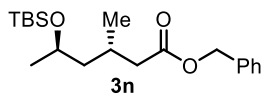

0.5%(0.2%TFA/0.1%DEA/5%THF/Hex)/0.3%IPA/Hex, CHIRALPAK IC-3

**98.2:1.8 e.r.**

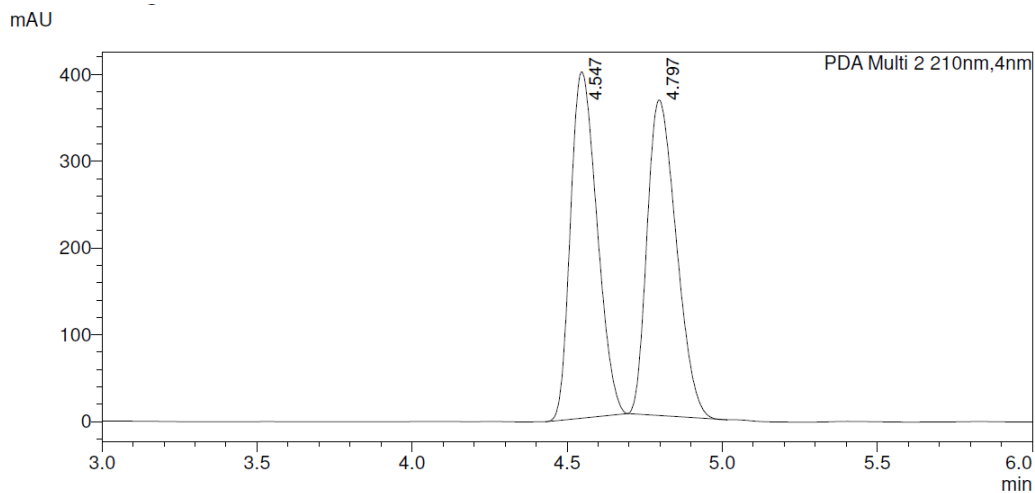

PDA Ch2 210nm

| Peak# | Ret. Time | Area    | Area%   | Height | Height% |
|-------|-----------|---------|---------|--------|---------|
| 1     | 4.547     | 2373587 | 49.953  | 397759 | 52.286  |
| 2     | 4.797     | 2378047 | 50.047  | 362980 | 47.714  |
| Total |           | 4751634 | 100.000 | 760739 | 100.000 |

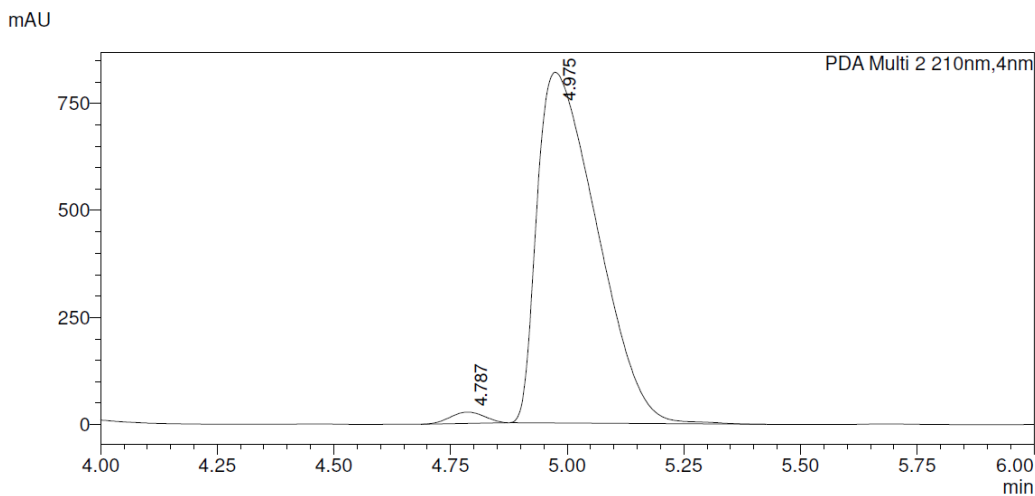

PDA Ch2 210nm

| Peak# | Ret. Time | Area    | Area%   | Height | Height% |
|-------|-----------|---------|---------|--------|---------|
| 1     | 4.787     | 136020  | 1.825   | 26582  | 3.145   |
| 2     | 4.975     | 7318250 | 98.175  | 818552 | 96.855  |
| Total |           | 7454270 | 100.000 | 845134 | 100.000 |

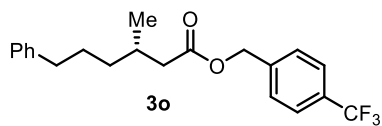

0.3%(0.2%TFA/0.1%DEA/5%EtOH/Hex)/99.7%Hex, CHIRALPAK IC-3

**95.3:4.7 e.r.**

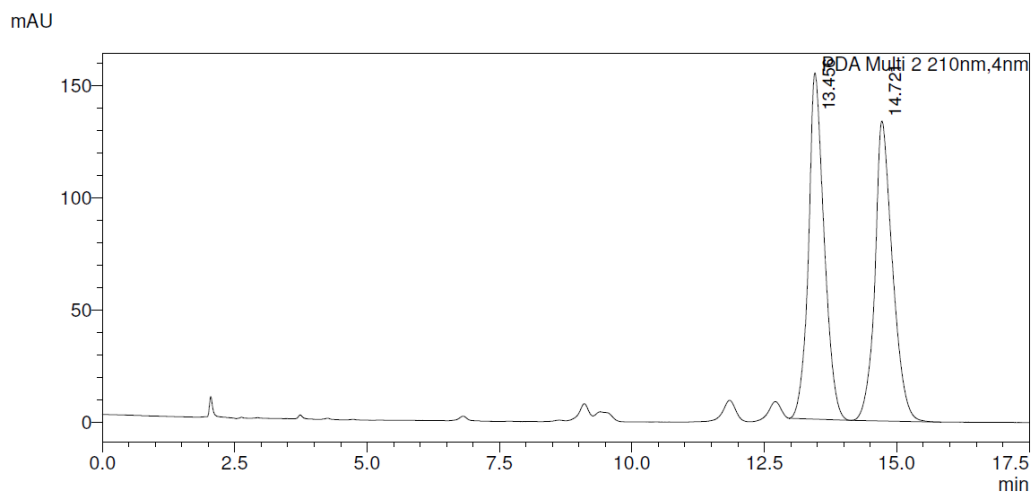

| PDA Ch2 210nm |           |         |         |        |         |
|---------------|-----------|---------|---------|--------|---------|
| Peak#         | Ret. Time | Area    | Area%   | Height | Height% |
| 1             | 13.456    | 3185332 | 50.593  | 154362 | 53.576  |
| 2             | 14.721    | 3110651 | 49.407  | 133756 | 46.424  |
| Total         |           | 6295984 | 100.000 | 288118 | 100.000 |

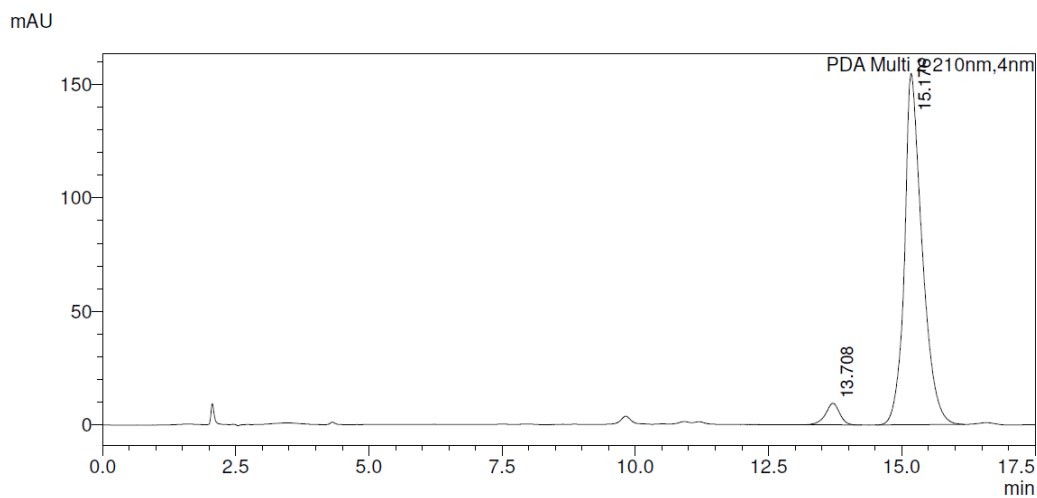

| PDA Ch2 210nm |           |         |         |        |         |
|---------------|-----------|---------|---------|--------|---------|
| Peak#         | Ret. Time | Area    | Area%   | Height | Height% |
| 1             | 13.708    | 175854  | 4.684   | 9467   | 5.770   |
| 2             | 15.176    | 3578364 | 95.316  | 154600 | 94.230  |
| Total         |           | 3754218 | 100.000 | 164068 | 100.000 |

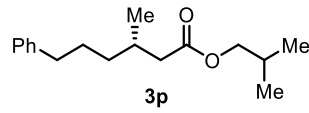

0.3%THF/Hex, CHIRALPAK IC-3

**99.4:0.6 e.r.**

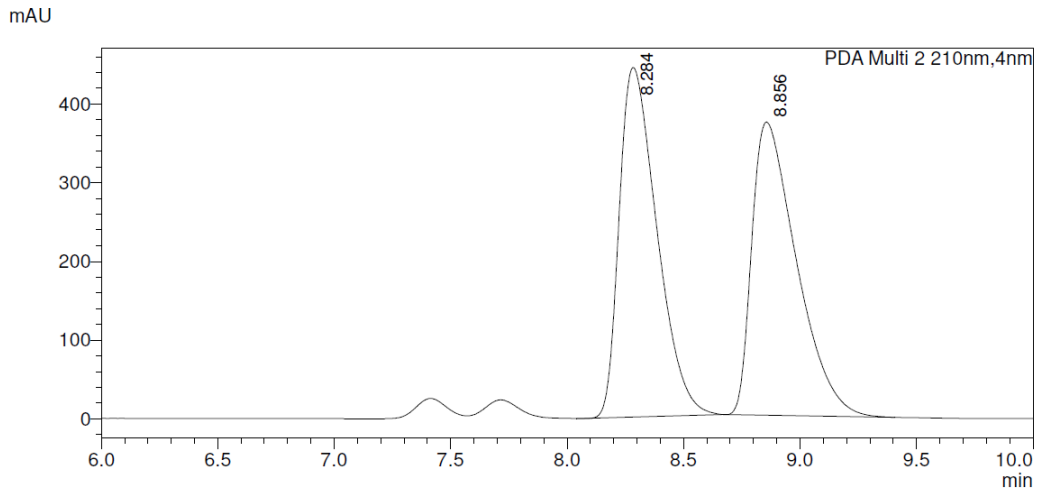

| PDA Ch2 210nm |           |         |         |        |         |
|---------------|-----------|---------|---------|--------|---------|
| Peak#         | Ret. Time | Area    | Area%   | Height | Height% |
| 1             | 8.284     | 4997191 | 50.160  | 443719 | 54.389  |
| 2             | 8.856     | 4965409 | 49.840  | 372100 | 45.611  |
| Total         |           | 9962600 | 100.000 | 815819 | 100.000 |

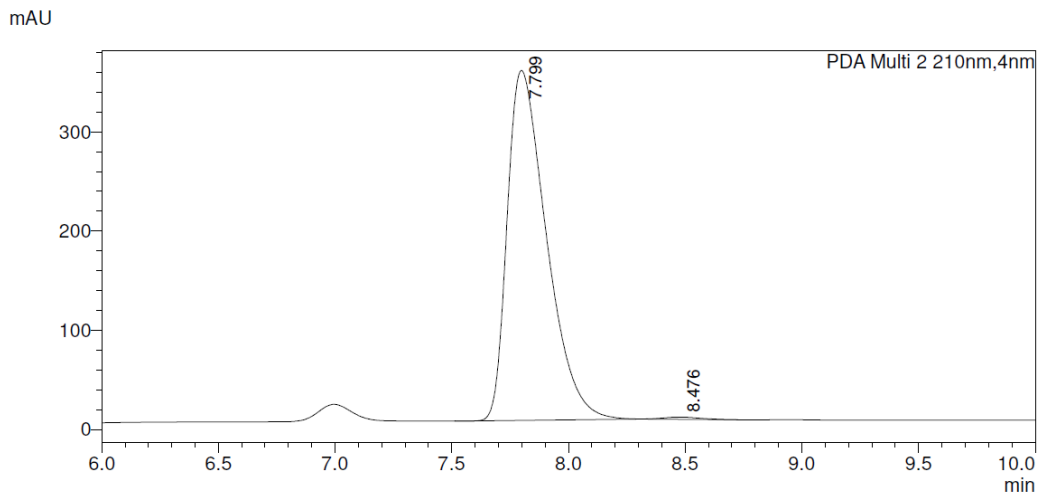

| PDA Ch2 210nm |           |         |         |        |         |
|---------------|-----------|---------|---------|--------|---------|
| Peak#         | Ret. Time | Area    | Area%   | Height | Height% |
| 1             | 7.799     | 4124964 | 99.433  | 352563 | 99.399  |
| 2             | 8.476     | 23521   | 0.567   | 2133   | 0.601   |
| Total         |           | 4148485 | 100.000 | 354696 | 100.000 |

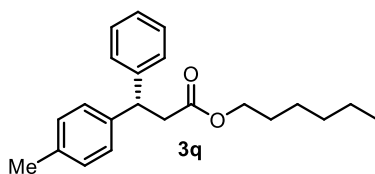

0.3%THF/Hex, 0.8 mL/min, CHIRALCEL OJ-H

**95.6:4.4 e.r.**

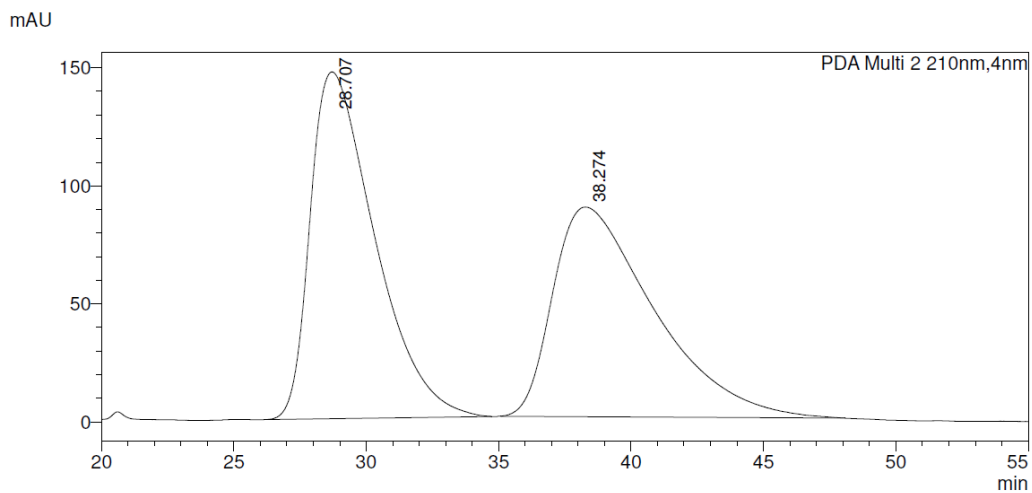

| PDA Ch2 210nm |           |          |         |        |         |
|---------------|-----------|----------|---------|--------|---------|
| Peak#         | Ret. Time | Area     | Area%   | Height | Height% |
| 1             | 28.707    | 24896177 | 51.327  | 146884 | 62.319  |
| 2             | 38.274    | 23609238 | 48.673  | 88814  | 37.681  |
| Total         |           | 48505415 | 100.000 | 235698 | 100.000 |

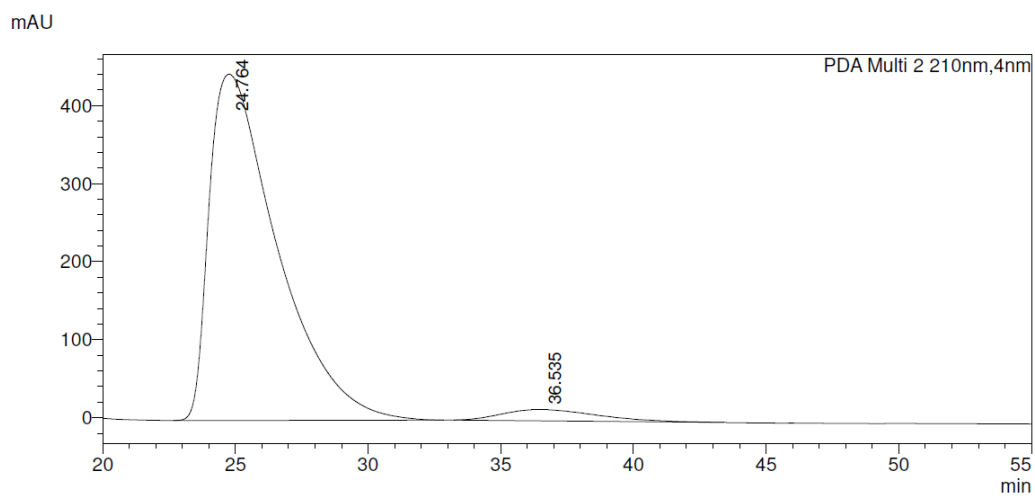

| PDA Ch2 210nm |           |          |         |        |         |
|---------------|-----------|----------|---------|--------|---------|
| Peak#         | Ret. Time | Area     | Area%   | Height | Height% |
| 1             | 24.764    | 79183178 | 95.638  | 443657 | 96.817  |
| 2             | 36.535    | 3611696  | 4.362   | 14585  | 3.183   |
| Total         |           | 82794873 | 100.000 | 458242 | 100.000 |



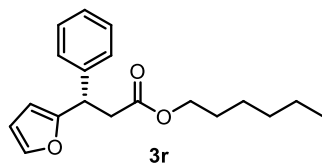

0.3%DCM/Hex, 1.0 mL/min, CHIRALPAK IB-3

**96.8 : 3.2 e.r.**

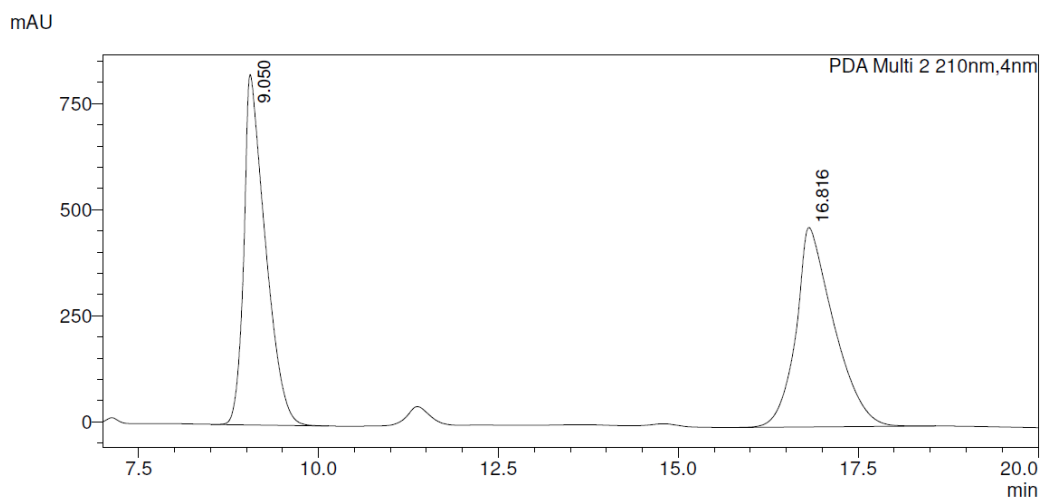

| PDA Ch2 210nm |           |          |         |         |         |
|---------------|-----------|----------|---------|---------|---------|
| Peak#         | Ret. Time | Area     | Area%   | Height  | Height% |
| 1             | 9.050     | 17260464 | 49.973  | 824806  | 63.700  |
| 2             | 16.816    | 17279041 | 50.027  | 470024  | 36.300  |
| Total         |           | 34539505 | 100.000 | 1294830 | 100.000 |

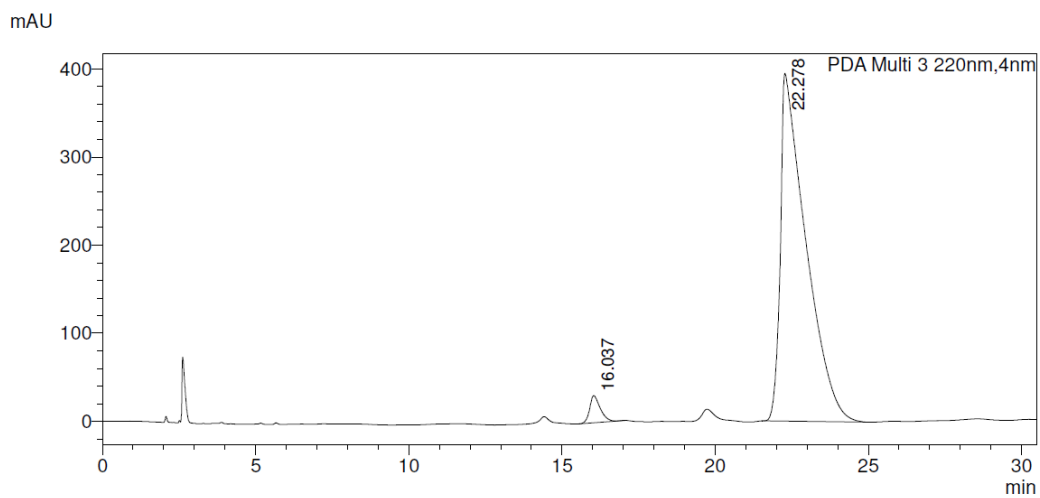

| PDA Ch3 220nm |           |          |         |        |         |
|---------------|-----------|----------|---------|--------|---------|
| Peak#         | Ret. Time | Area     | Area%   | Height | Height% |
| 1             | 16.037    | 745059   | 3.158   | 30770  | 7.235   |
| 2             | 22.278    | 22847486 | 96.842  | 394514 | 92.765  |
| Total         |           | 23592545 | 100.000 | 425284 | 100.000 |

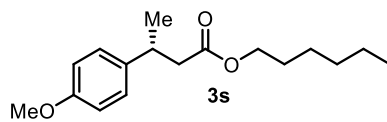

0.3%THF/Hex, 0.8 mL/min, CHIRALPAK IB-3, **97.0:3.0 e.r.**

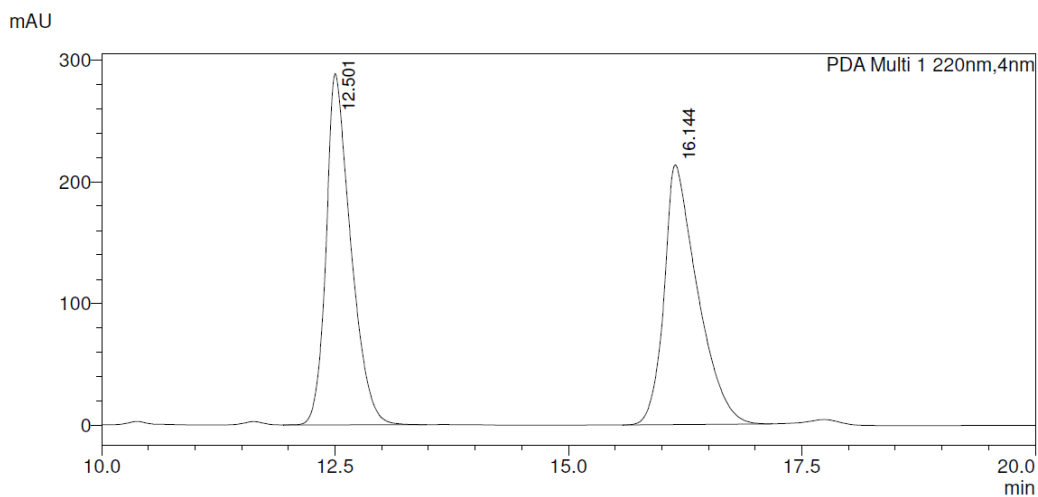

| PDA Ch1 220nm |           |          |         |        |         |
|---------------|-----------|----------|---------|--------|---------|
| Peak#         | Ret. Time | Area     | Area%   | Height | Height% |
| 1             | 12.501    | 5304998  | 49.932  | 287965 | 57.503  |
| 2             | 16.144    | 5319540  | 50.068  | 212819 | 42.497  |
| Total         |           | 10624538 | 100.000 | 500784 | 100.000 |

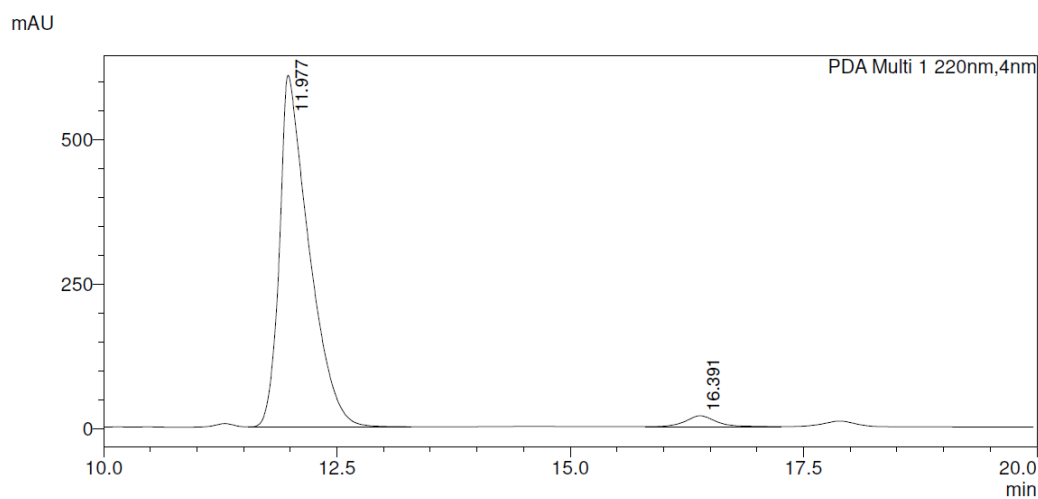

| PDA Ch1 220nm |           |          |         |        |         |
|---------------|-----------|----------|---------|--------|---------|
| Peak#         | Ret. Time | Area     | Area%   | Height | Height% |
| 1             | 11.977    | 13436560 | 96.977  | 607738 | 97.015  |
| 2             | 16.391    | 418880   | 3.023   | 18700  | 2.985   |
| Total         |           | 13855440 | 100.000 | 626438 | 100.000 |

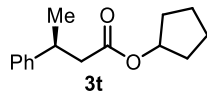

Reduced with LiAlH<sub>4</sub> to the 1° alcohol; **95.4 : 4.6 e.r.**

0.3%DCM/Hex, 1.0 mL/min, CHIRALCEL OJ-H

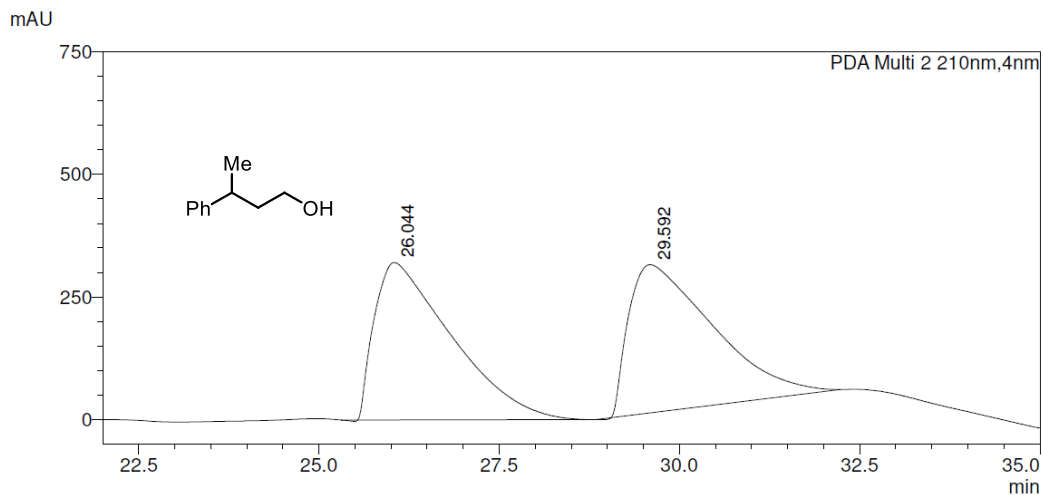

PDA Ch2 210nm

| Peak# | Ret. Time | Area     | Area%   | Height | Height% |
|-------|-----------|----------|---------|--------|---------|
| 1     | 26.044    | 23869421 | 49.375  | 321168 | 51.492  |
| 2     | 29.592    | 24473977 | 50.625  | 302554 | 48.508  |
| Total |           | 48343398 | 100.000 | 623722 | 100.000 |

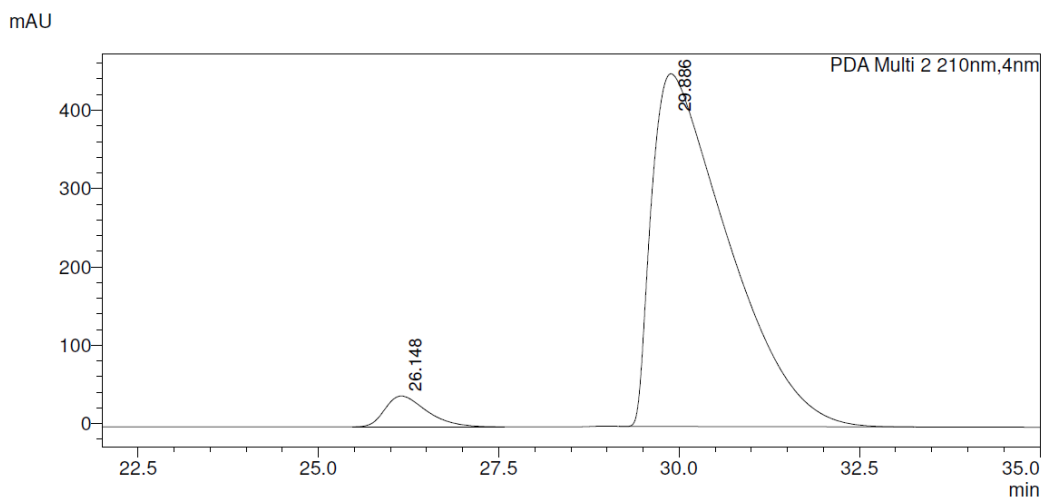

PDA Ch2 210nm

| Peak# | Ret. Time | Area     | Area%   | Height | Height% |
|-------|-----------|----------|---------|--------|---------|
| 1     | 26.148    | 1584746  | 4.556   | 39335  | 8.041   |
| 2     | 29.886    | 33200155 | 95.444  | 449842 | 91.959  |
| Total |           | 34784902 | 100.000 | 489177 | 100.000 |

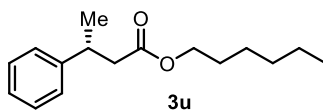

100% Hex, 0.5 mL/min, CHIRALPAK IA-3

**98.7 : 1.3 e.r.**

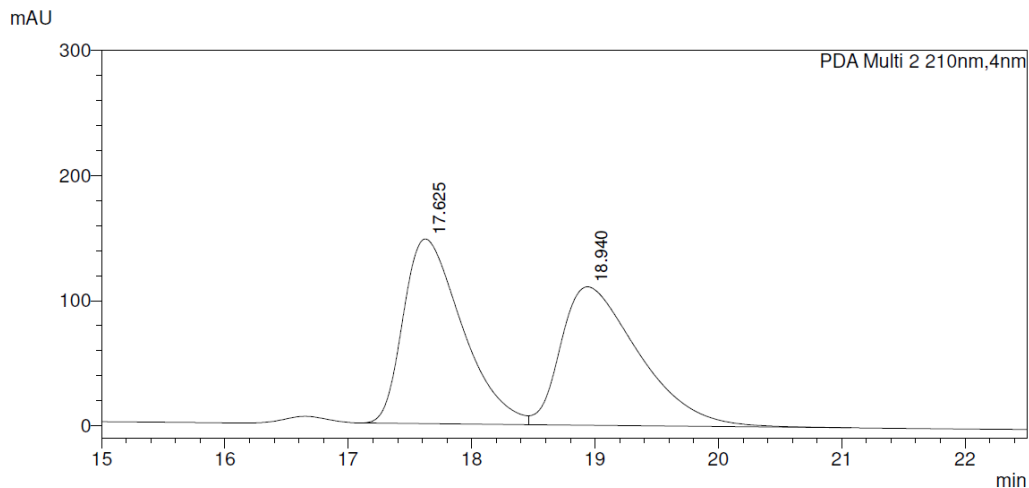

| PDA Ch2 210nm |           |         |         |        |         |
|---------------|-----------|---------|---------|--------|---------|
| Peak#         | Ret. Time | Area    | Area%   | Height | Height% |
| 1             | 17.625    | 4909128 | 50.203  | 147579 | 57.155  |
| 2             | 18.940    | 4869454 | 49.797  | 110628 | 42.845  |
| Total         |           | 9778582 | 100.000 | 258207 | 100.000 |

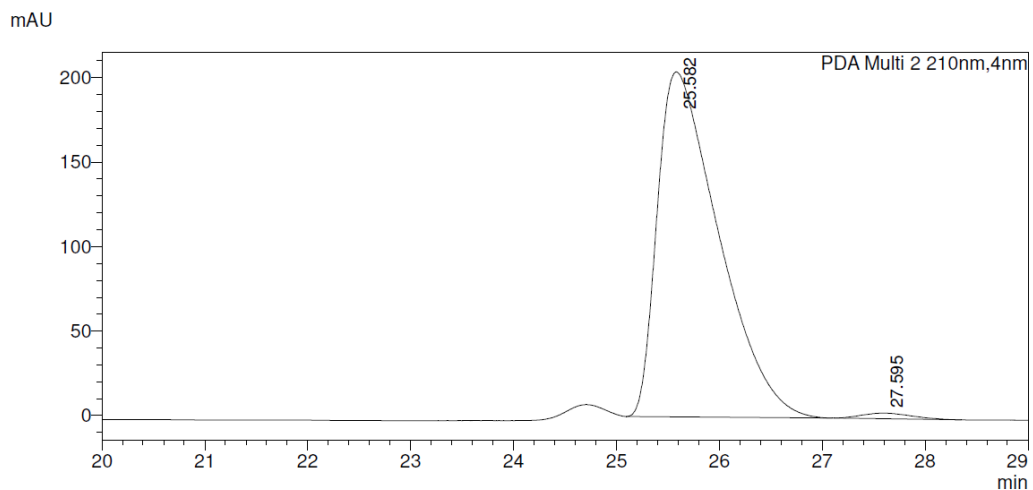

| PDA Ch2 210nm |           |         |         |        |         |
|---------------|-----------|---------|---------|--------|---------|
| Peak#         | Ret. Time | Area    | Area%   | Height | Height% |
| 1             | 25.582    | 8478555 | 98.700  | 204311 | 98.410  |
| 2             | 27.595    | 111648  | 1.300   | 3301   | 1.590   |
| Total         |           | 8590203 | 100.000 | 207612 | 100.000 |

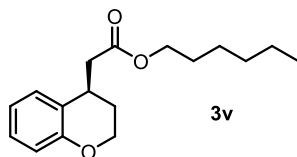

0.3%THF/Hex, 0.8 mL/min, CHIRALPAK IB-3

**96.7:3.3 e.r.**

mAU

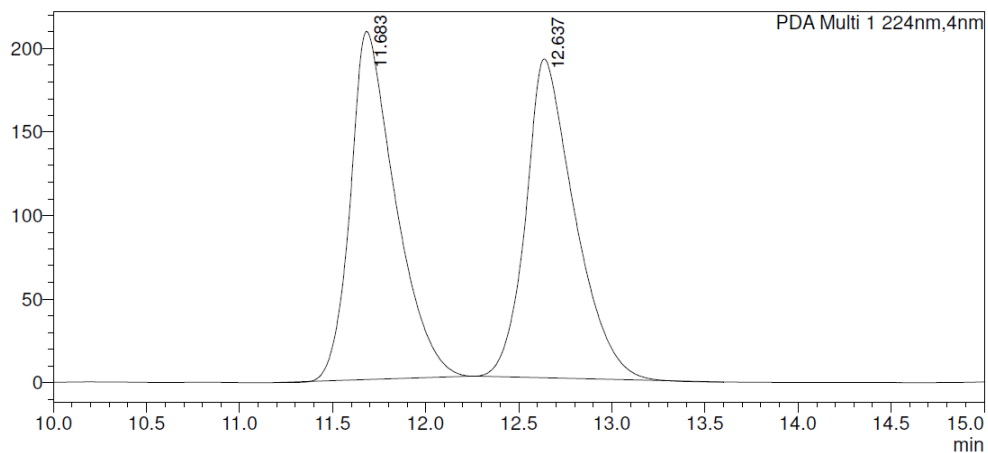

PDA Ch1 224nm

| Peak# | Ret. Time | Area    | Area%   | Height | Height% |
|-------|-----------|---------|---------|--------|---------|
| 1     | 11.683    | 3507435 | 50.079  | 208320 | 52.195  |
| 2     | 12.637    | 3496379 | 49.921  | 190801 | 47.805  |
| Total |           | 7003813 | 100.000 | 399121 | 100.000 |

mAU

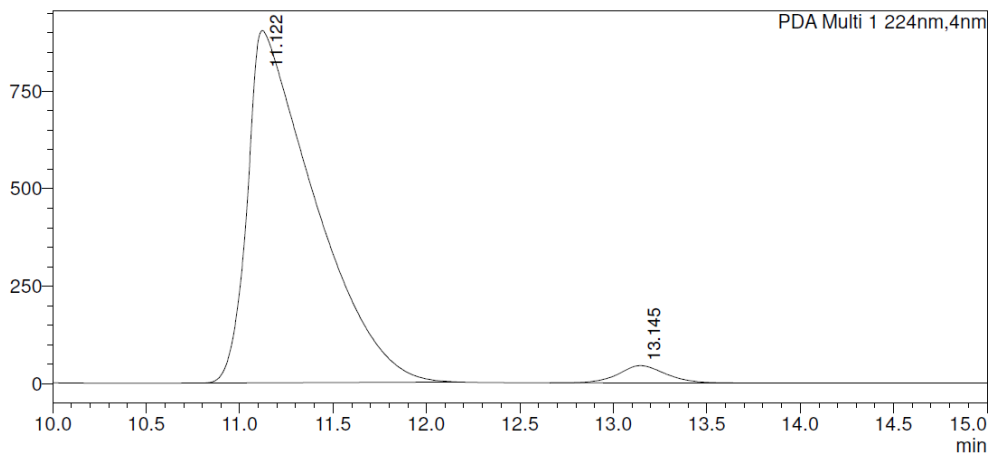

PDA Ch1 224nm

| Peak# | Ret. Time | Area     | Area%   | Height | Height% |
|-------|-----------|----------|---------|--------|---------|
| 1     | 11.122    | 22729071 | 96.692  | 902909 | 95.315  |
| 2     | 13.145    | 777618   | 3.308   | 44379  | 4.685   |
| Total |           | 23506689 | 100.000 | 947288 | 100.000 |

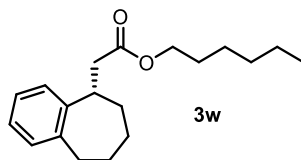

0.3%(95%hex, 5%EtOH, 0.2%TFA, 0.1%DEA), 99.7% hexanes, 0.8ml/min, CHIRALPAK IA-3

**98.1:1.9 e.r.**

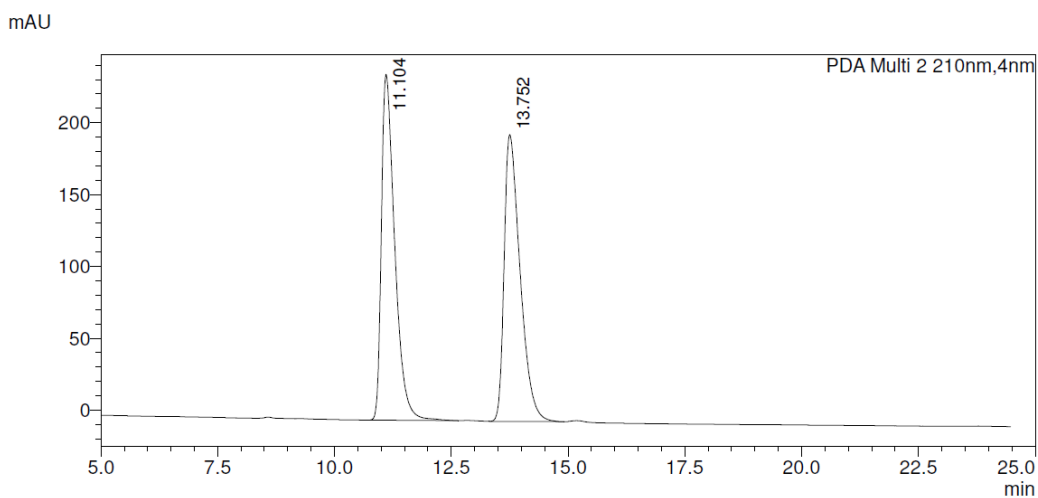

| PDA Ch2 210nm |           |         |        |         |
|---------------|-----------|---------|--------|---------|
| Peak#         | Ret. Time | Area    | Height | Area%   |
| 1             | 11.104    | 4786878 | 240525 | 50.223  |
| 2             | 13.752    | 4744335 | 199572 | 49.777  |
| Total         |           | 9531213 | 440096 | 100.000 |

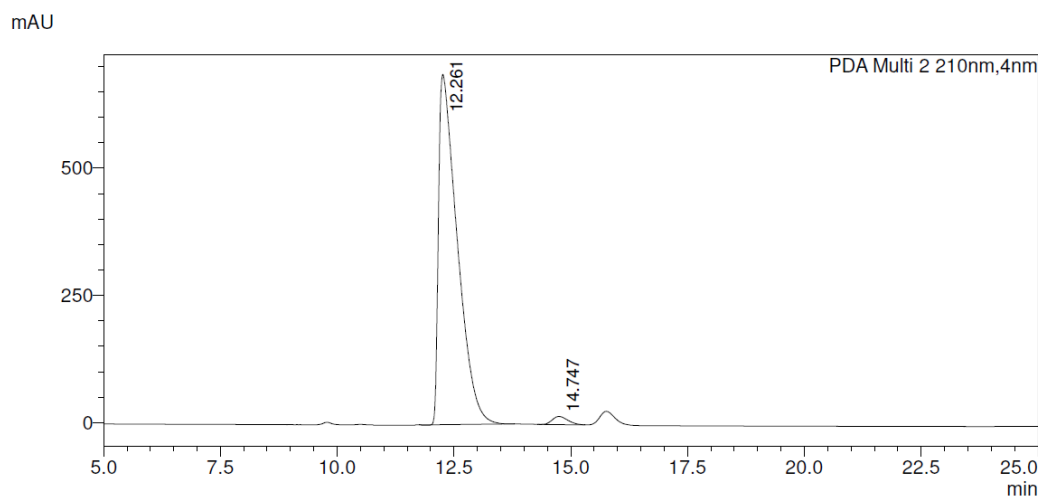

| PDA Ch2 210nm |           |          |        |         |
|---------------|-----------|----------|--------|---------|
| Peak#         | Ret. Time | Area     | Height | Area%   |
| 1             | 12.261    | 19173915 | 688179 | 98.073  |
| 2             | 14.747    | 376728   | 16244  | 1.927   |
| Total         |           | 19550644 | 704422 | 100.000 |

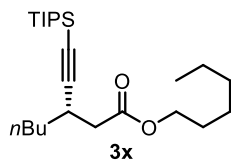

100% Hex, 1.0 mL/min, CHIRALPAK IC-3

**99.1 : 0.9 e.r.**

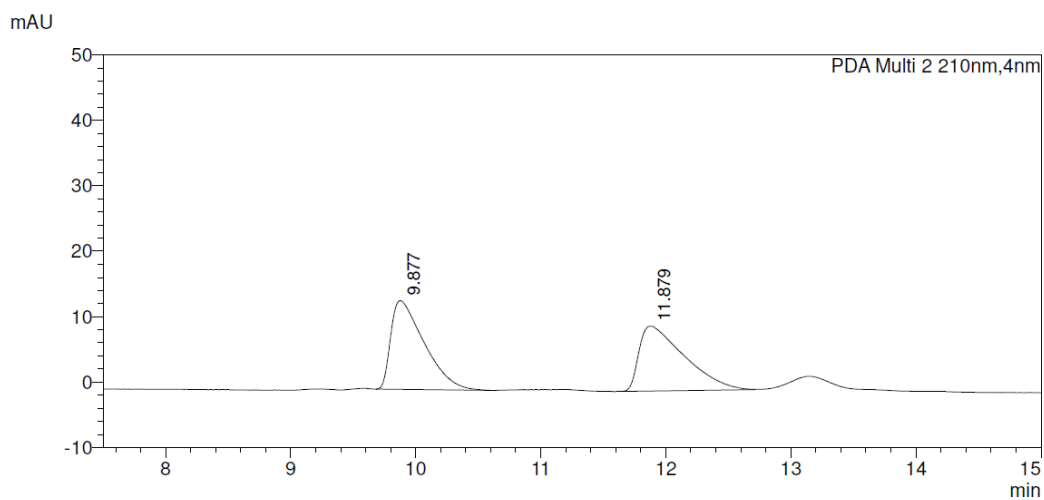

| PDA Ch2 210nm |           |        |         |        |         |
|---------------|-----------|--------|---------|--------|---------|
| Peak#         | Ret. Time | Area   | Area%   | Height | Height% |
| 1             | 9.877     | 252315 | 50.291  | 13580  | 57.771  |
| 2             | 11.879    | 249398 | 49.709  | 9927   | 42.229  |
| Total         |           | 501713 | 100.000 | 23507  | 100.000 |

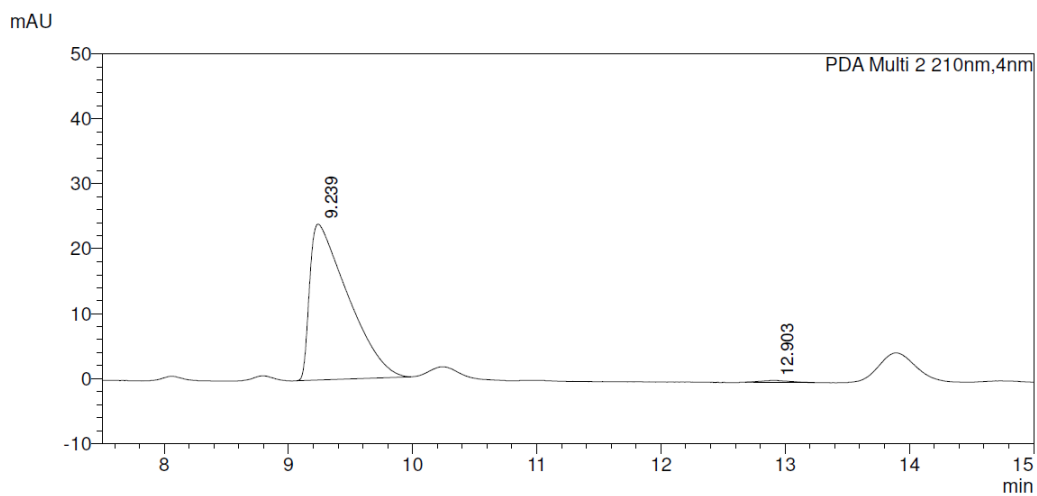

| PDA Ch2 210nm |           |        |         |        |         |
|---------------|-----------|--------|---------|--------|---------|
| Peak#         | Ret. Time | Area   | Area%   | Height | Height% |
| 1             | 9.239     | 512507 | 99.094  | 23989  | 98.840  |
| 2             | 12.903    | 4688   | 0.906   | 281    | 1.160   |
| Total         |           | 517194 | 100.000 | 24270  | 100.000 |

## E. Allylic Amine Synthesis and Characterization

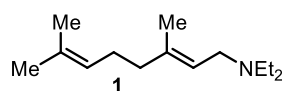

**(E)-N,N-diethyl-3,7-dimethylocta-2,6-dien-1-amine**

Synthesized according to literature precedent.<sup>1</sup>

<sup>1</sup>H NMR (500 MHz, CDCl<sub>3</sub>) δ 5.28 – 5.21 (m, 1H), 5.08 (tt, *J* = 6.9, 1.5 Hz, 1H), 3.05 (d, *J* = 6.9 Hz, 2H), 2.51 (q, *J* = 7.2 Hz, 4H), 2.09 (q, *J* = 7.4 Hz, 2H), 2.05 – 1.99 (m, 2H), 1.67 (s, 3H), 1.63 (s, 3H), 1.59 (s, 3H), 1.03 (t, *J* = 7.1 Hz, 6H).

<sup>13</sup>C NMR (126 MHz, CDCl<sub>3</sub>) δ 137.73, 131.57, 124.38, 121.99, 50.71, 46.81, 39.99, 26.59, 25.85, 17.82, 16.44, 11.98.

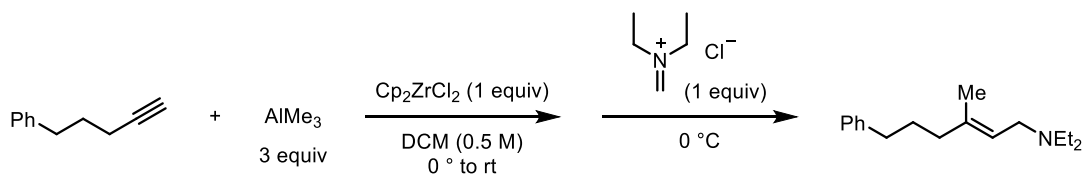

**(E)-N,N-diethyl-3-methyl-6-phenylhex-2-en-1-amine:** Zirconocene dichloride (5.80 g, 20.0 mmol, 1.0 equiv) was added to a dry 250-mL round-bottomed flask under N<sub>2</sub> atmosphere followed by 40 mL dry methylene chloride. The mixture was cooled to 0 °C with stirring. Trimethylaluminum (2 M in Hexanes) (30 mL, 60.0 mmol, 3.0 equiv) was added slowly *via* syringe. The reaction mixture stirred at 0 °C for 10 min. The reaction mixture turned yellow after stirring. 5-phenyl-1-pentyne (3.0 mL, 20.0 mmol) was then added to the reaction mixture *via* syringe. After addition of the alkyne, the flask was warmed to rt and stirred overnight. The reaction flask was cooled to 0 °C followed by addition of *N*-ethyl-*N*-methyleneethaniminium chloride (2.42 g, 20 mmol, 1.0 equiv) in 10 mL dry methylene chloride (*N*-ethyl-*N*-methyleneethaniminium chloride solution was made in a N<sub>2</sub> glovebox). The reaction mixture stirred for an additional 2.5 h, after which it was quenched at 0 °C with sat. NH<sub>4</sub>Cl. The crude reaction mixture was filtered over celite. The filtrate was dried with anhydrous Na<sub>2</sub>SO<sub>4</sub>, filtered, and the solvent was removed *in vacuo*. The crude oil was purified *via* flash column chromatography on silica gel with 1% MeOH/10% Et<sub>2</sub>O/89% (3% NH<sub>3</sub>/DCM). The product was then distilled at reduced pressure (106–108 °C at 0.176 Torr) to yield 1.45 g (33%) of a clear, colorless oil.



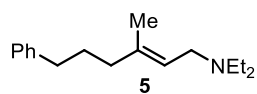

**(E)-N,N-diethyl-3-methyl-6-phenylhex-2-en-1-amine** C<sub>17</sub>H<sub>27</sub>N

**<sup>1</sup>H NMR** (500 MHz, CDCl<sub>3</sub>) δ 7.30 – 7.27 (m, 2H), 7.20 – 7.15 (m, 3H), 5.29 (tq, *J* = 6.8, 1.3 Hz, 1H), 3.07 (d, *J* = 6.8 Hz, 2H), 2.61 – 2.56 (m, 2H), 2.51 (q, *J* = 7.2 Hz, 4H), 2.06 (t, *J* = 7.5 Hz, 2H), 1.79 – 1.71 (m, 2H), 1.64 (s, 3H), 1.03 (t, *J* = 7.2 Hz, 6H).

**<sup>13</sup>C NMR** (126 MHz, CDCl<sub>3</sub>) δ 142.78, 137.61, 128.56, 128.39, 125.77, 122.18, 50.67, 46.85, 39.57, 35.65, 29.73, 16.42, 12.00.

**HRMS** (ESI-TOF) *m/z*: [M+H<sup>+</sup>] calculated for C<sub>17</sub>H<sub>28</sub>N, 246.2222; found, 246.2217.

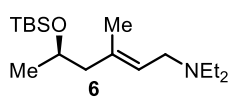

**(R,E)-5-((tert-butyldimethylsilyloxy)-N,N-diethyl-3-methylhex-2-en-1-amine**

C<sub>17</sub>H<sub>37</sub>NOSi

Synthesized according to literature precedent.<sup>1</sup>

**<sup>1</sup>H NMR** (500 MHz, CDCl<sub>3</sub>) δ 5.28 (td, *J* = 6.6, 1.5 Hz, 1H), 3.93 (dt, *J* = 6.9, 5.9 Hz, 1H), 3.06 (d, *J* = 6.8 Hz, 2H), 2.51 (q, *J* = 7.1 Hz, 4H), 2.22 (dd, *J* = 13.1, 6.0 Hz, 1H), 2.06 (dd, *J* = 13.1, 6.8 Hz, 1H), 1.65 (s, 3H), 1.10 (d, *J* = 6.0 Hz, 3H), 1.03 (t, *J* = 7.2 Hz, 6H), 0.88 (s, 9H), 0.04 (d, *J* = 7.4 Hz, 6H).

**<sup>13</sup>C NMR** (126 MHz, CDCl<sub>3</sub>) δ 135.12, 124.68, 67.64, 50.67, 50.42, 46.86, 26.02, 23.57, 18.31, 17.16, 11.95, -4.40, -4.63.

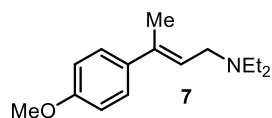

**(E)-N,N-diethyl-3-(4-methoxyphenyl)but-2-en-1-amine** C<sub>15</sub>H<sub>23</sub>NO

Synthesized according to literature precedent.<sup>1</sup>

**<sup>1</sup>H NMR** (500 MHz, CDCl<sub>3</sub>) δ 7.36 – 7.33 (m, 2H), 6.87 – 6.83 (m, 2H), 5.86 – 5.80 (m, 1H), 3.81 (s, 3H), 3.26 (dd, *J* = 6.7, 1.0 Hz, 2H), 2.58 (q, *J* = 7.1 Hz, 4H), 2.04 (s, 3H), 1.07 (t, *J* = 7.1 Hz, 6H).

**<sup>13</sup>C NMR** (126 MHz, CDCl<sub>3</sub>) δ 158.76, 136.23, 136.01, 126.80, 124.29, 113.68, 55.44, 51.53, 47.14, 16.24, 12.06.

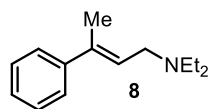

**(E)-N,N-diethyl-3-phenylbut-2-en-1-amine** C<sub>14</sub>H<sub>21</sub>N

Synthesized according to literature precedent.<sup>1</sup>

**<sup>1</sup>H NMR** (500 MHz, CDCl<sub>3</sub>) δ 7.43 – 7.39 (m, 2H), 7.34 – 7.29 (m, 2H), 7.25 – 7.21 (m, 1H), 5.91 (tq, *J* = 6.6, 1.4 Hz, 1H), 3.28 (dd, *J* = 6.6, 1.0 Hz, 2H), 2.58 (q, *J* = 7.2 Hz, 4H), 2.07 (d, *J* = 1.2 Hz, 3H), 1.07 (t, *J* = 7.1 Hz, 6H).

**<sup>13</sup>C NMR** (126 MHz, CDCl<sub>3</sub>) δ 143.68, 136.65, 128.33, 126.92, 125.95, 125.79, 51.53, 47.19, 16.23, 12.08.

3,3-diaryl allylic diethylamine substrates were synthesized by the following method and the starting vinyl bromide was synthesized according to our previous report.<sup>1</sup>

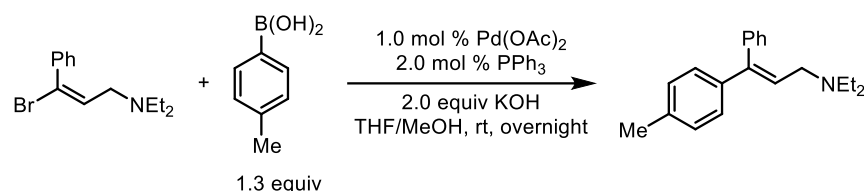

**Procedure:** A 50 mL round bottom flask was charged with a stir bar and 11 mg Pd(OAc)<sub>2</sub> (0.050 mmol, 1.0 mol %), 26 mg PPh<sub>3</sub> (0.10 mmol, 2.0 mol %), 0.560 g KOH (10 mmol, 2.0 equiv), starting material vinyl bromide (1.34g, 5 mmol, 1.0 equiv), 0.880 g 4-methyl boronic acid (6.5 mmol, 1.3 equiv) and 5 mL THF and 5 mL MeOH. The reaction was stirred at rt overnight followed by dilution with EtOAc, and washed by 1 N NaOH solution and brine. The organic layer was then dried over MgSO<sub>4</sub>, concentrated *in vacuo*, purified by Al<sub>2</sub>O<sub>3</sub> column chromatography: 200 g Al<sub>2</sub>O<sub>3</sub> + 12 g H<sub>2</sub>O, 30 : 1 hexanes/ EtOAc with 0.5% MeOH as eluent.

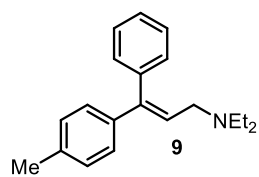

**(E)-N,N-diethyl-3-phenyl-3-(p-tolyl)prop-2-en-1-amine** C<sub>20</sub>H<sub>25</sub>N

Prepared according to the above procedure and isolated at 70% yield.

**<sup>1</sup>H NMR** (500 MHz, CDCl<sub>3</sub>) δ 7.40 – 7.33 (m, 2H), 7.34 – 7.29 (m, 1H), 7.18 – 7.12 (m, 4H), 7.10 – 7.06 (m, 2H), 6.19 (t, *J* = 6.7 Hz, 1H), 3.15 (d, *J* = 6.8 Hz, 2H), 2.52 (q, *J* = 7.2 Hz, 4H), 2.32 (s, 3H), 0.96 (t, *J* = 7.1 Hz, 6H).

**<sup>13</sup>C NMR** (126 MHz, CDCl<sub>3</sub>) δ 143.24, 140.11, 139.65, 137.01, 129.97, 128.96, 128.21, 127.27, 127.15, 126.55, 51.86, 47.13, 21.20, 11.96.

**HRMS** (ESI-TOF) *m/z*: [M+H<sup>+</sup>] calculated for C<sub>20</sub>H<sub>26</sub>N, 280.2065; found, 280.2070.

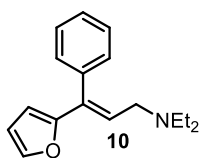

**(E)-N,N-diethyl-3-(furan-2-yl)-3-phenylprop-2-en-1-amine** C<sub>17</sub>H<sub>21</sub>NO

Prepared according to the above procedure and isolated at 69% yield.

**<sup>1</sup>H NMR** (500 MHz, CDCl<sub>3</sub>) δ 7.41 – 7.32 (m, 4H), 7.25 – 7.22 (m, 2H), 6.40 (t, J = 7.0 Hz, 1H), 6.31 (dd, J = 3.3, 1.8 Hz, 1H), 5.80 (d, J = 3.3 Hz, 1H), 3.14 (d, J = 7.0 Hz, 2H), 2.52 (q, J = 7.1 Hz, 4H), 0.96 (t, J = 7.2 Hz, 6H).

**<sup>13</sup>C NMR** (126 MHz, CDCl<sub>3</sub>) δ 155.34, 142.06, 137.29, 133.58, 129.75, 128.25, 127.67, 124.13, 111.28, 108.14, 50.94, 47.02, 12.01.

**HRMS** (ESI-TOF) *m/z*: [M+H<sup>+</sup>] calculated for C<sub>17</sub>H<sub>22</sub>NO, 256.1701; found, 256.1706.

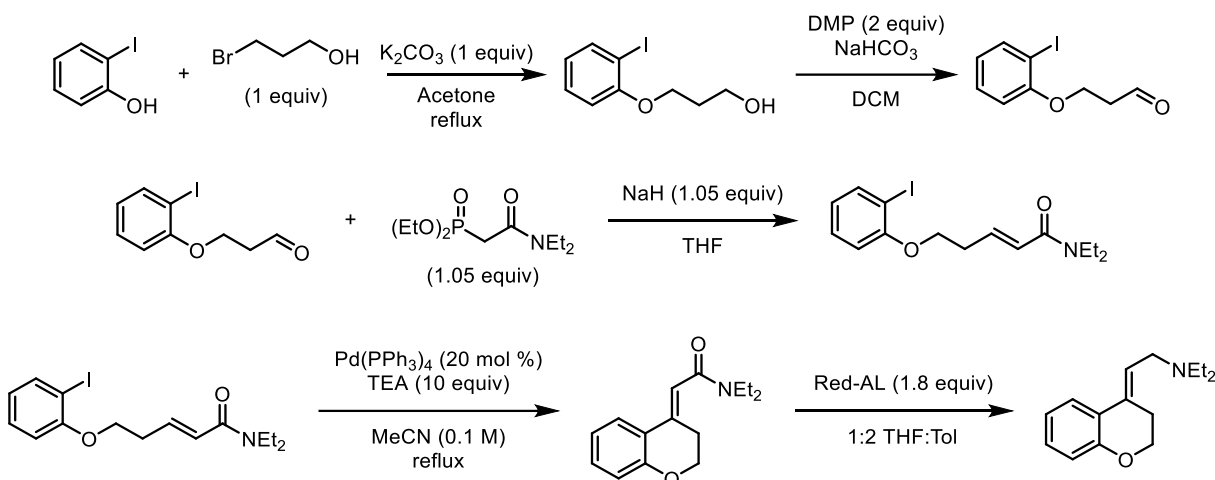

**(E)-2-(chroman-4-ylidene)-N,N-diethylethan-1-amine**: 2-iodophenol (4.4 g, 20 mmol), K<sub>2</sub>CO<sub>3</sub> (2.8 g, 20 mmol, 1.0 equiv), 3-bromo-1-propanol (1.8 mL, 20 mmol, 1.0 equiv), and acetone (20 mL) were added to a dried 250-mL round-bottomed flask equipped with a stir bar. A reflux condenser, and the reaction mixture was stirred at reflux overnight. The reaction flask was then cooled to room temperature. The crude reaction mixture was washed with DI H<sub>2</sub>O and extracted with EtOAc. The aqueous layer was back-extracted with methylene chloride. The combined organic layers were dried over MgSO<sub>4</sub>. The mixture was filtered to remove solids, and the solvent was removed *in vacuo*. The crude product was used without further purification.

A 500-mL round-bottomed flask with stir bar (not dried) was charged with 3-(2-iodophenoxy)propan-1-ol (5.6 g, 20 mmol), NaHCO<sub>3</sub> (4 g, 47.6 mmol, 2.4 equiv), and wash bottle grade methylene chloride (100 mL).

The reaction mixture was cooled to 0 °C with stirring. Dess-Martin periodinane (17 g, 40 mmol, 2.0 equiv) was added to the stirring reaction mixture in one portion, and the reaction continued stirring for 2.5 h. The reaction mixture was warmed to room temperature and filtered over a bed of celite. The filtrate was washed with sat. NaHCO<sub>3</sub>. The combined aqueous layers were extracted with methylene chloride. The combined organic layers were dried over Na<sub>2</sub>SO<sub>4</sub>, filtered, and the solvent was removed *in vacuo*. The crude product was purified *via* flash column chromatography over silica gel with 10% to 20% to 30% EtOAc/Hex. The product was obtained as an orange oil (4.2 g, 76% yield).

A 250-mL round-bottomed flask was equipped with a magnetic stir bar and dried. NaH (60% dispersion in mineral oil) (0.63 g, 15.75 mmol, 1.05 equiv) was added to the flask and then placed under N<sub>2</sub> atmosphere. Dry THF (25 mL) was added to the flask *via* syringe. The reaction flask was then cooled to 0 °C. **Diethyl (2-(diethylamino)-2-oxoethyl)phosphonate** was added dropwise *via* syringe. The reaction mixture was stirred until clear. **3-(2-iodophenoxy)propanal** was then added to the reaction flask and stirred overnight while slowly warming to room temperature. The reaction mixture was cooled to 0 °C and then quenched with sat. NH<sub>4</sub>Cl. The solids were filtered and the filtrate was extracted with EtOAc. The combined organic layers were dried over MgSO<sub>4</sub>, filtered, and the solvent was removed *in vacuo*. The crude oil was purified *via* silica gel flash column chromatography (10% to 50% EtOAc/Hex gradient).

A dry 250-mL 3-necked flask equipped with a stir bar was charged with Pd(PPh<sub>3</sub>)<sub>4</sub> (1.2 g, 1 mmol, 0.20 equiv) under N<sub>2</sub> atmosphere. Triethylamine (7 mL, 50 mmol, 10 equiv), **(E)-N,N-diethyl-5-(2-iodophenoxy)pent-2-enamide** (1.9 g, 5 mmol), and MeCN (50 mL) were then added to the reaction flask sequentially *via* syringe. The flask was topped with a reflux condenser and heated to reflux overnight. The reaction mixture was then cooled to room temperature, and the solvent was removed *in vacuo*. The crude oil was washed with DI H<sub>2</sub>O and extracted with methylene chloride. The combined organic layers were dried over MgSO<sub>4</sub>, filtered, and the solvent was removed *in vacuo*. The crude oil was used without further purification.

A dry 100-mL round-bottomed flask equipped with a stir bar was dried and placed under N<sub>2</sub> atmosphere. To the flask was added dry THF (4 mL) and dry toluene (8 mL) followed by **(E)-2-(chroman-4-ylidene)-N,N-diethylacetamide** (0.98 g, 4 mmol). The reaction solution was cooled to 0 °C. Red-AL (3.5 M in toluene) (2.4

mL, 7.2 mmol, 1.8 equiv) was added dropwise *via* syringe. The reaction flask was warmed to room temperature and stirred for 2.25 h. The reaction solution was cooled to 0 °C and quenched with NaOH (5 M aq.) The crude reaction mixture was extracted with EtOAc. The combined organic layers were dried over Na<sub>2</sub>SO<sub>4</sub>, filtered, and the solvent was removed *in vacuo*. The crude product was purified *via* silica gel flash column chromatography [1% MeOH/10% Et<sub>2</sub>O/89% (3% to 7% NH<sub>3</sub> in DCM)]. The product was obtained in 0.583 g, 63%.

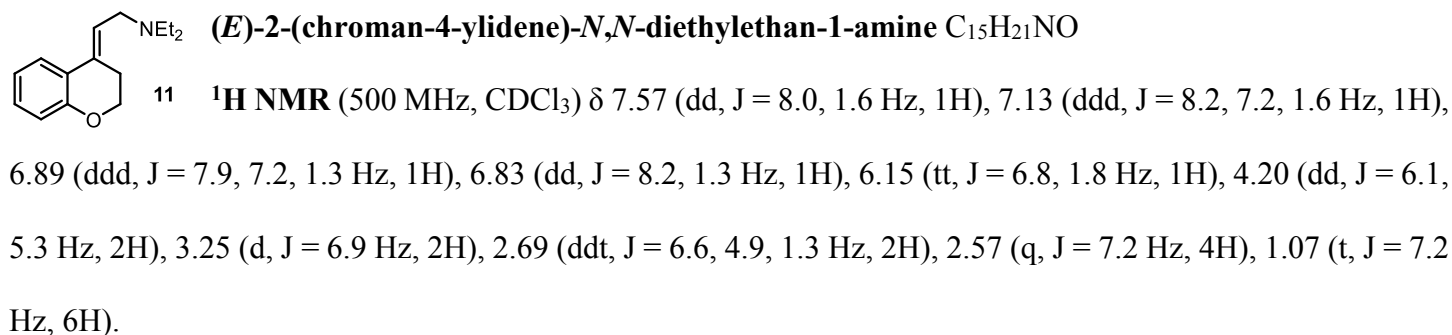

<sup>13</sup>C NMR (126 MHz, CDCl<sub>3</sub>) δ 154.50, 130.23, 128.77, 124.11, 122.72, 120.94, 120.04, 117.59, 66.26, 50.55, 47.15, 26.26, 12.04.

The cyclic allylic diethylamine substrates 1k and 1m were synthesized by following method and the starting diethyl (2-(diethylamino)-2-oxoethyl) phosphonate was synthesized according to our previous report.<sup>1</sup>

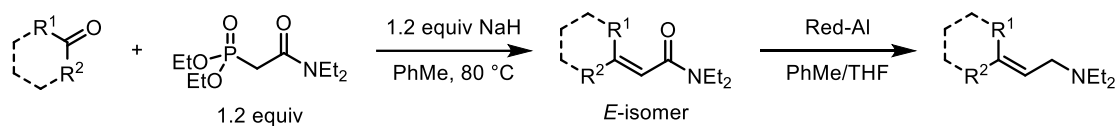

**Olefination:** A dry 100mL round-bottom flask was charged with a stir bar and 0.48g NaH (60 wt %, 12 mmol, 1.2 equiv), purged with nitrogen followed by the addition of 15 mL toluene. The flask was cooled to 0 °C, and diethyl (2-(diethylamino)-2-oxoethyl)phosphonate was added dropwise (2.8 mL, 12 mmol, 1.2 equiv). The reaction was stirred at 0 °C for 30 min until the solution become clear. The ketone was added dropwise (10 mmol, 1.0 equiv) to the reaction over 5 min, then warmed to 80 °C and stirred overnight. The reaction was quenched with sat. NH<sub>4</sub>Cl solution, and the aqueous layer was extracted with DCM three times. The combined organic layers were dried over MgSO<sub>4</sub> and purified by silica column chromatography.

**Reduction:** A dry 20 mL round-bottom flask was charged with a stir bar, purged with N<sub>2</sub> three times, followed by the addition of unsaturated amide (4.0 mmol), dry THF (3 mL) and dry toluene (6 mL, V(tol)/V(THF)=2). The flask was then cooled in an ice bath, and RedAl solution (2.0 equiv, 3.5 M) was added dropwise. The reaction was stirred at 0 °C for 2 hours then warmed to rt for another 4 hours. The crude reaction was cooled in an ice bath and quenched by the addition of 10 mL 5 M NaOH solution and 20 mL toluene. After stirring for 30 minutes, the crude was transferred to a separatory funnel. Organic layer was separated, washed by 5 M NaOH solution twice, dried over MgSO<sub>4</sub>, concentrated *in vacuo* and further purified by Al<sub>2</sub>O<sub>3</sub> column chromatography.

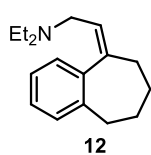

**(Z)-N,N-diethyl-2-(6,7,8,9-tetrahydro-5H-benzo[7]annulen-5-ylidene)ethan-1-amine** C<sub>17</sub>H<sub>25</sub>N

Prepared according to the above procedure and isolated at 25% overall yield.

<sup>1</sup>H NMR (500 MHz, CDCl<sub>3</sub>) δ 7.17 – 7.09 (m, 3H), 7.02 – 6.97 (m, 1H), 5.64 (t, J = 6.8 Hz, 1H), 3.00 (d, J = 6.8 Hz, 2H), 2.77 – 2.67 (m, 2H), 2.47 (q, J = 7.1 Hz, 4H), 2.33 – 2.24 (m, 2H), 1.85 (p, J = 5.9 Hz, 2H), 1.72 – 1.61 (m, 2H), 0.92 (t, J = 7.1 Hz, 6H).

<sup>13</sup>C NMR (125 MHz, CDCl<sub>3</sub>) δ 145.62, 141.73, 141.18, 129.12, 128.98, 126.92, 125.59, 124.99, 51.08, 46.81, 38.10, 36.63, 33.30, 27.87, 11.76.

**HRMS** (ESI-TOF) *m/z*: [M+H<sup>+</sup>] calculated for C<sub>17</sub>H<sub>26</sub>N, 244.2065; found, 244.2059.

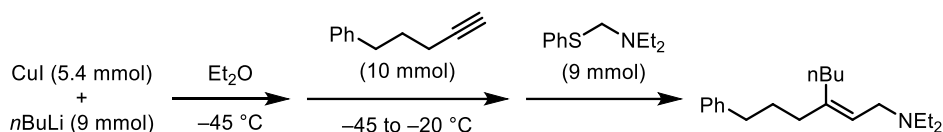

**(E)-N,N-diethyl-3-(3-phenylpropyl)hept-2-en-1-amine:** CuI (1.1 g, 5.4 mmol, 0.54 equiv) and Et<sub>2</sub>O (40 mL) were added to a dry 100-mL Schlenk flask equipped with a stir bar under atmosphere of N<sub>2</sub>. The flask was cooled to –45 °C. *n*-butyl lithium (1.6 M in hexanes) (6 mL, 9 mmol, 0.9 equiv) was added to the reaction flask *via* syringe. The reaction mixture stirred at temperature for 30 min. 5-phenyl-1-pentyne was then added to the reaction mixture *via* syringe. The reaction was stirred at –45 °C for an additional 10 min after which it was warmed to –20 °C and stirred for an additional 2 h. The flask was then cooled to –45 °C, and *N*-ethyl-*N*-

((phenylthio)methyl)ethanamine was added to the reaction mixture *via* syringe. The flask was warmed to room temperature and allowed to stir overnight. The reaction mixture was then cooled to 0 °C and quenched with sat. NH<sub>4</sub>Cl then NH<sub>4</sub>OH (1 M aq.). The crude reaction mixture was filtered. The filtrate was extracted with EtOAc, dried over MgSO<sub>4</sub>, and the solvent was removed *in vacuo*. The crude oil was dissolved in Et<sub>2</sub>O and extracted with HCl (1 M) x3. The combined aqueous layers were basified with 10% NaOH (aq.) and extracted with methylene chloride. The combined organic layers were dried over MgSO<sub>4</sub>, filtered, and the solvent was removed *in vacuo*. The crude oil was purified *via* basic alumina flash column chromatography (12 g DI H<sub>2</sub>O in 300 g basic alumina; 1% to 10% MeOH/5% to 10% Et<sub>2</sub>O/pet. ether). The product was purified again *via* silica gel flash column chromatography [1% MeOH/10% Et<sub>2</sub>O/89%(1% to 7% NH<sub>3</sub> in DCM)]. The product was collected as a colorless oil in 21% yield.

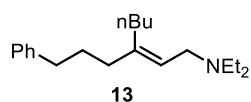

**(E)-N,N-diethyl-3-(3-phenylpropyl)hept-2-en-1-amine** C<sub>20</sub>H<sub>33</sub>N

**<sup>1</sup>H NMR** (500 MHz, CDCl<sub>3</sub>) δ 7.31 – 7.26 (m, 2H), 7.20 – 7.15 (m, 3H), 5.26 (t, J = 6.7 Hz, 1H), 3.07 (d, J = 6.7 Hz, 2H), 2.59 (t, J = 7.8 Hz, 2H), 2.51 (q, J = 7.1 Hz, 4H), 2.09 – 2.00 (m, 4H), 1.78 – 1.69 (m, 2H), 1.35 – 1.24 (m, 4H), 1.03 (t, J = 7.1 Hz, 6H), 0.90 (t, J = 7.1 Hz, 3H).

**<sup>13</sup>C NMR** (126 MHz, CDCl<sub>3</sub>) δ 142.83, 141.97, 128.55, 128.39, 125.77, 122.43, 50.49, 46.87, 36.76, 35.81, 30.90, 30.32, 30.02, 23.02, 14.20, 12.03.

**HRMS** (ESI-TOF) *m/z*: [M+H<sup>+</sup>] calculated for C<sub>20</sub>H<sub>34</sub>N, 288.2691; found, 288.2694.

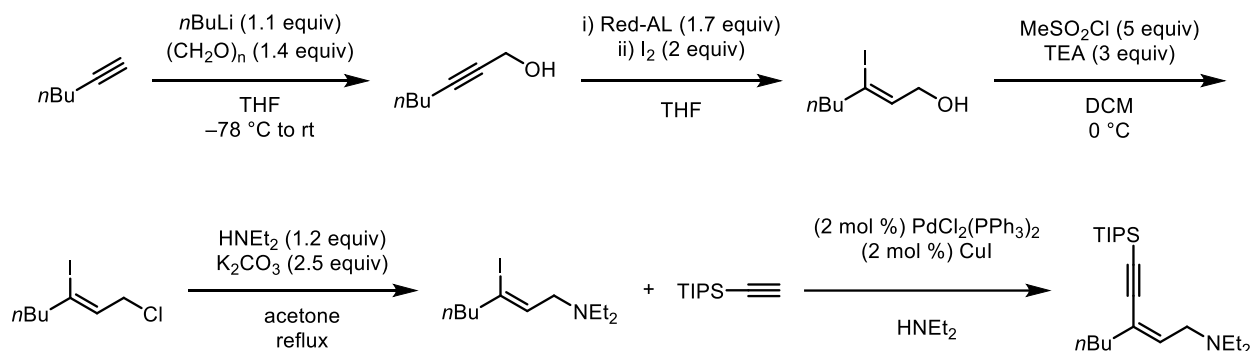

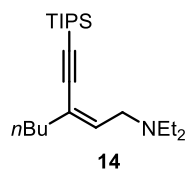

**(Z)-N,N-diethyl-3-((triisopropylsilyl)ethynyl)hept-2-en-1-amine** C<sub>22</sub>H<sub>43</sub>NSi

**<sup>1</sup>H NMR** (500 MHz, CDCl<sub>3</sub>) δ 5.79 (tt, J = 7.0, 1.2 Hz, 1H), 3.37 (dd, J = 7.0, 1.1 Hz, 2H), 2.54 (q, J = 7.2 Hz, 4H), 2.15 (td, J = 7.3, 1.1 Hz, 2H), 1.52 (p, J = 7.4 Hz, 2H), 1.31 (dq, J = 14.6,

7.3 Hz, 2H), 1.09 (s, 21H), 1.04 (t, J = 7.1 Hz, 6H), 0.89 (t, J = 7.3 Hz, 3H).

**<sup>13</sup>C NMR** (126 MHz, CDCl<sub>3</sub>) δ 134.96, 126.05, 105.45, 95.60, 52.94, 47.14, 36.97, 30.47, 22.02, 18.81, 14.04, 12.06, 11.47.

**HRMS** (ESI-TOF) *m/z*: [M+H<sup>+</sup>] calculated for C<sub>22</sub>H<sub>44</sub>NSi, 350.3243; found, 350.3232.

## F. References

- (1) Wu, Z.; Laffoon, S. D.; Nguyen, T. T.; McAlpin, J. D.; Hull, K. L. *Angew. Chem. Int. Ed.* **2017**, *56*, 1371-1375.



SDLI206-1.1H  
STANDARD PROTON PARAMETERS

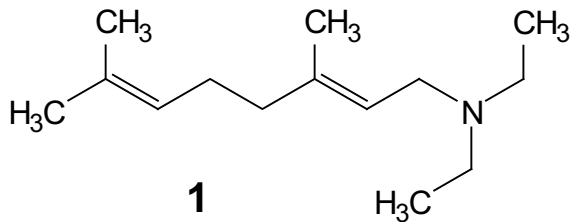

— 7.26 CDCl<sub>3</sub>

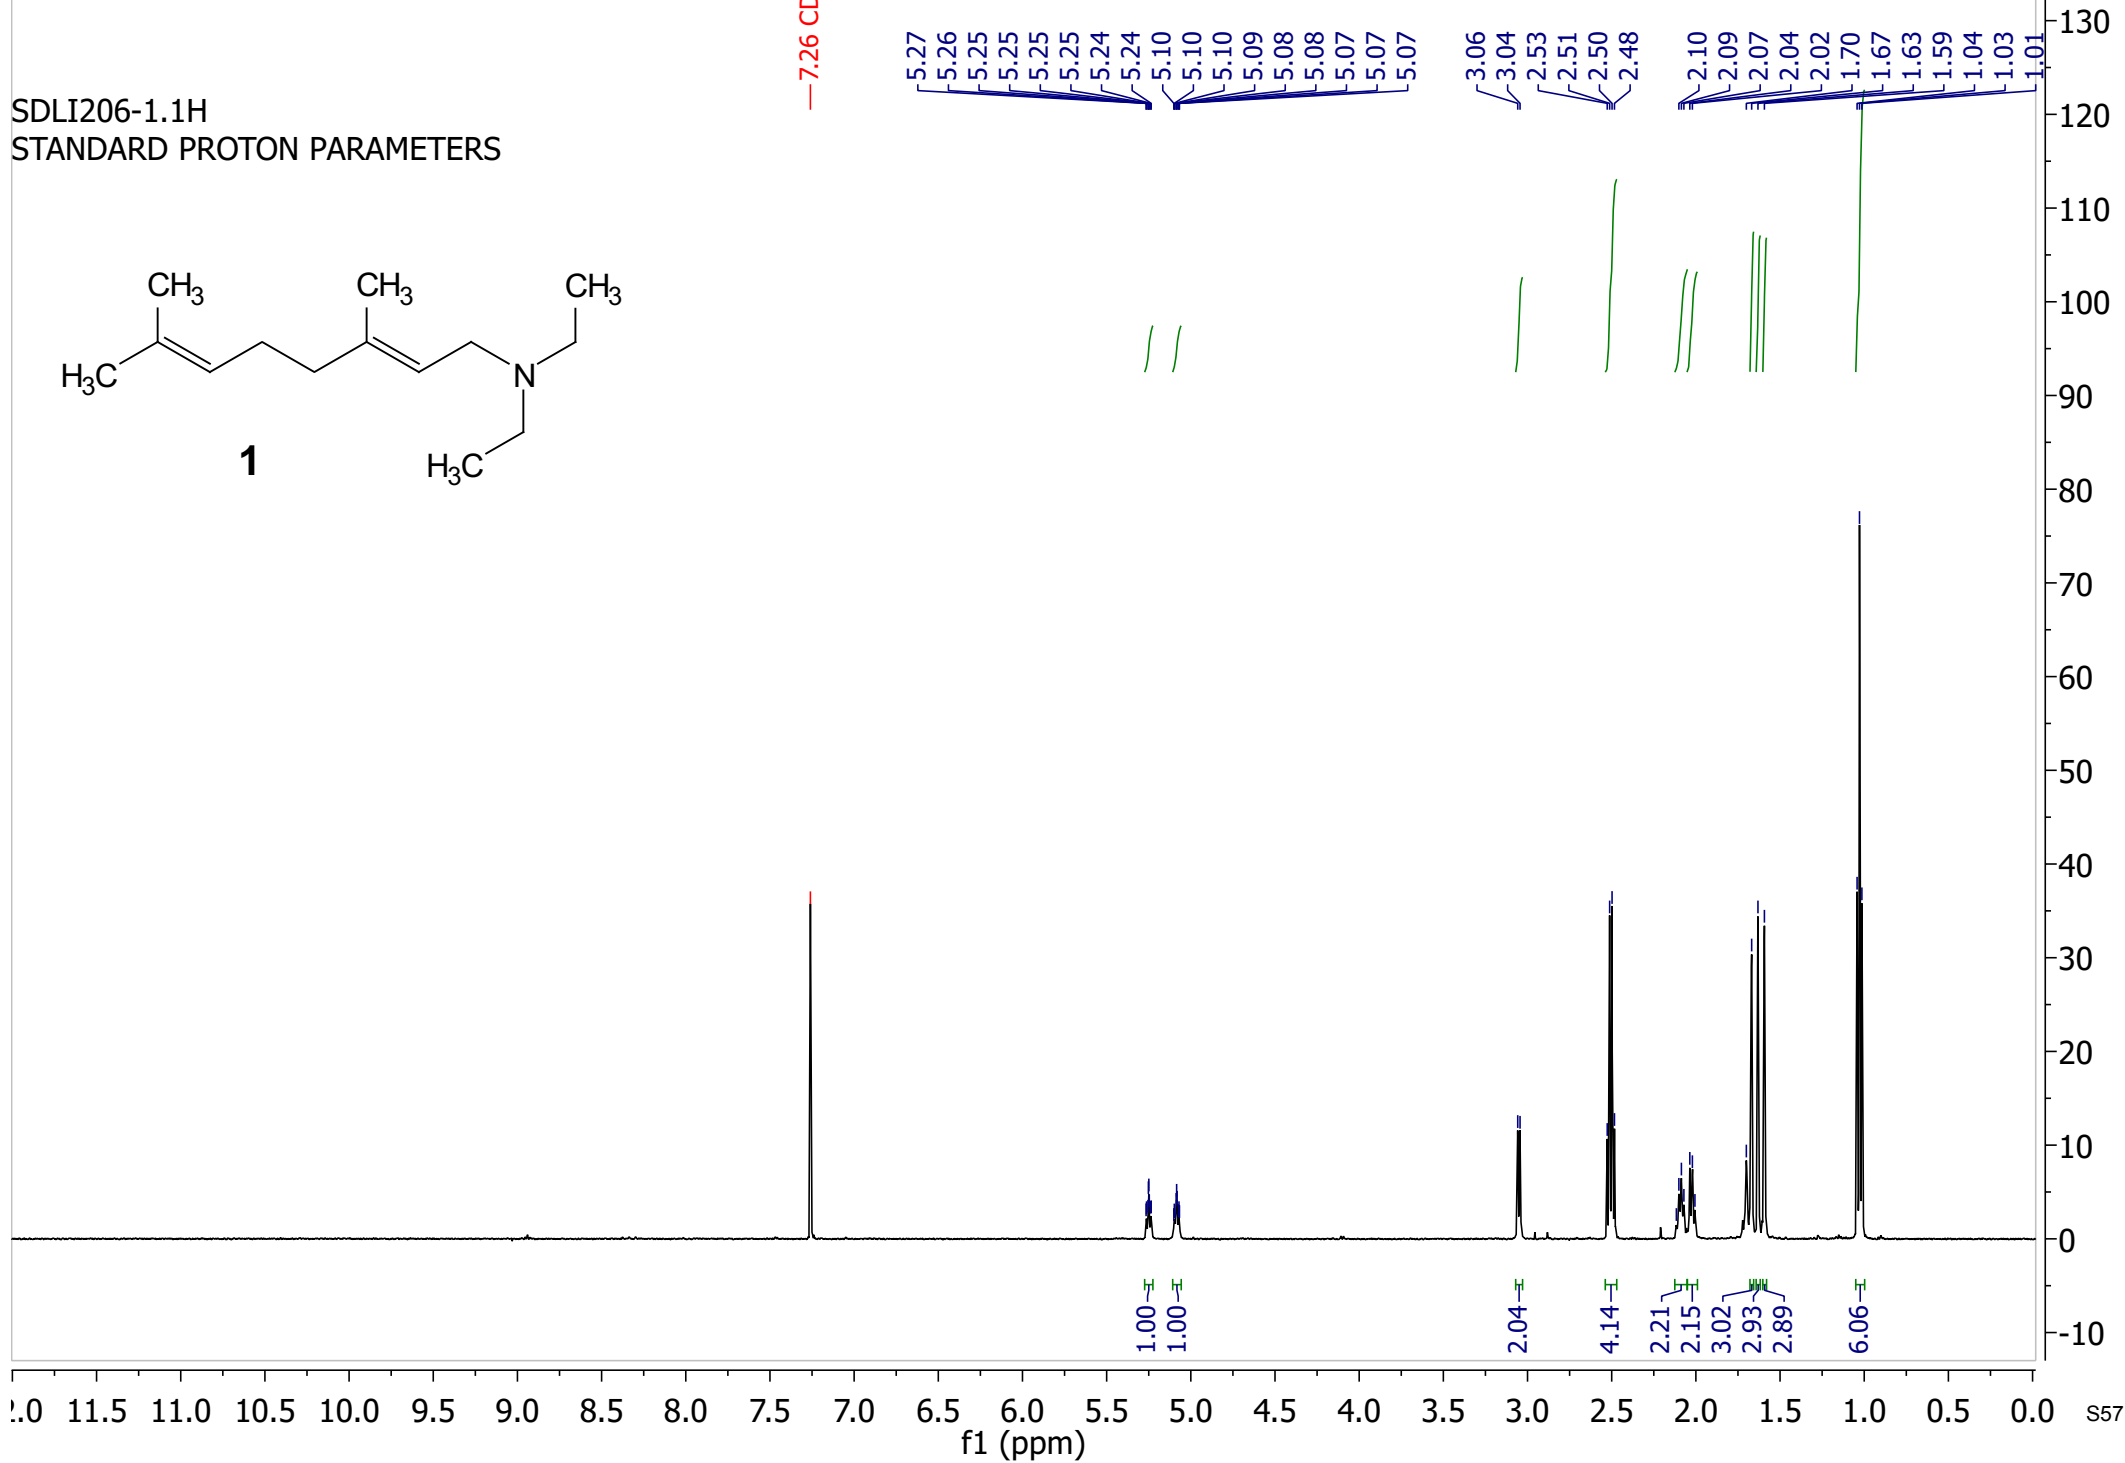

SDL-geranyldiethylamine.13C.10.fid

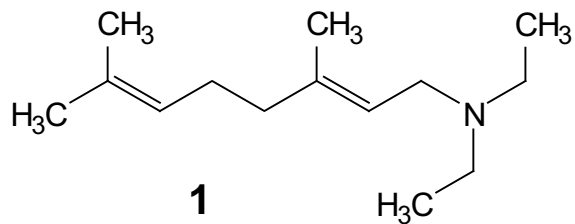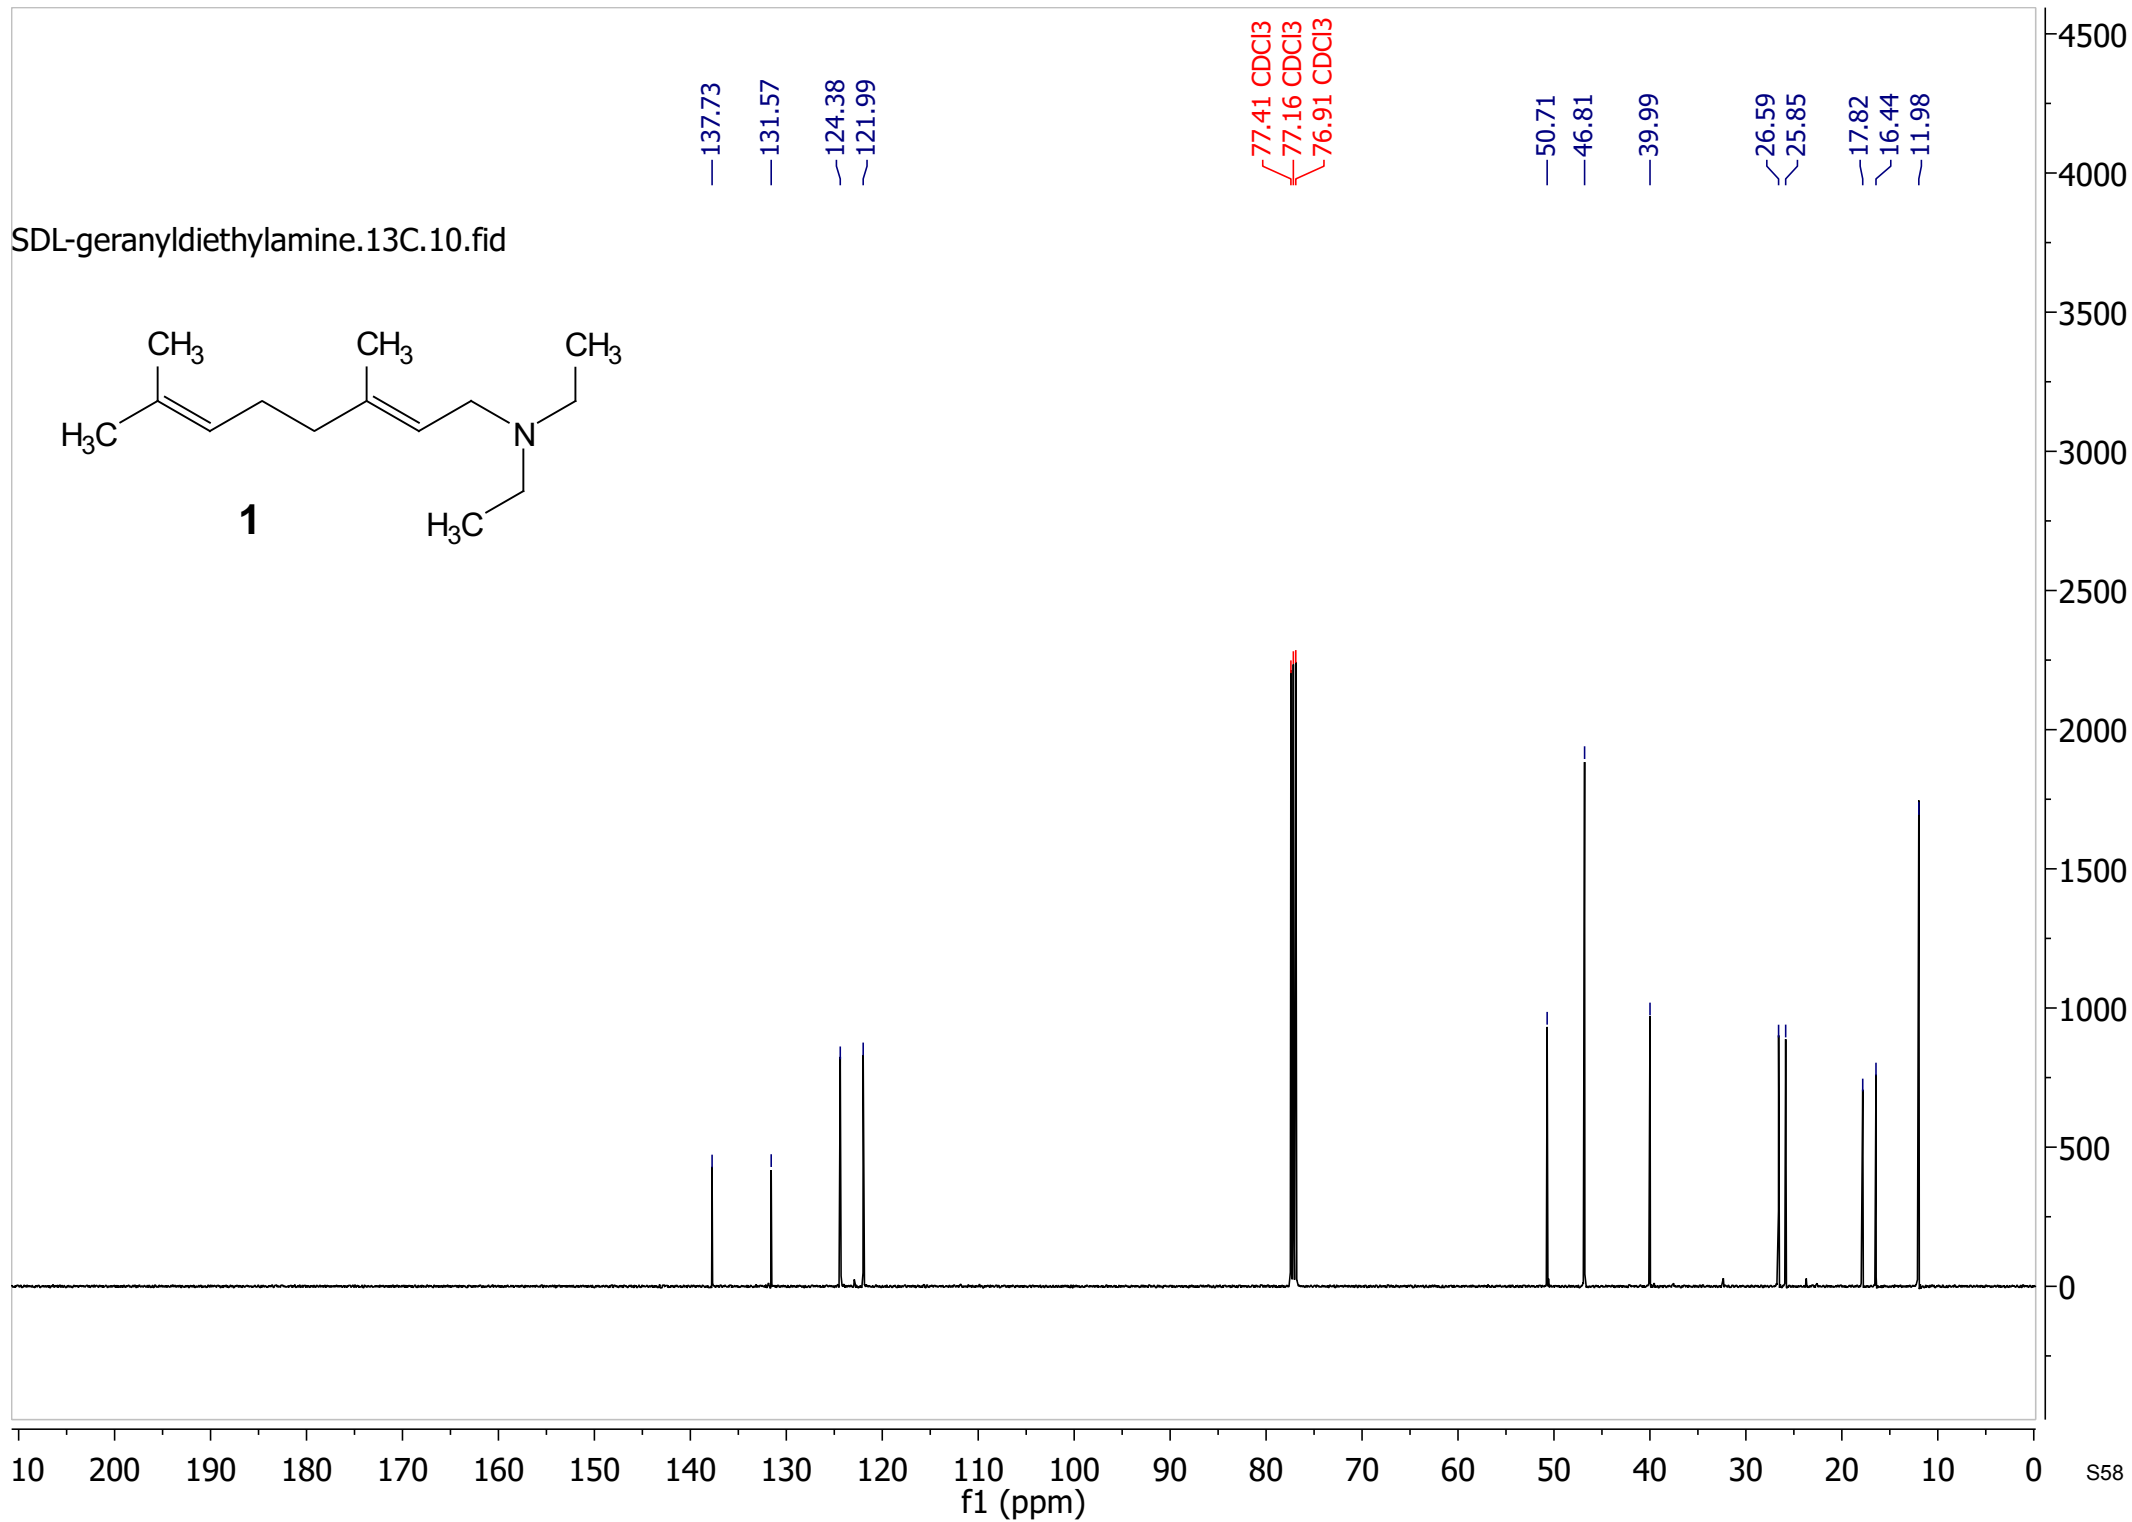

SDL-III-86-pp.1H.10.fid

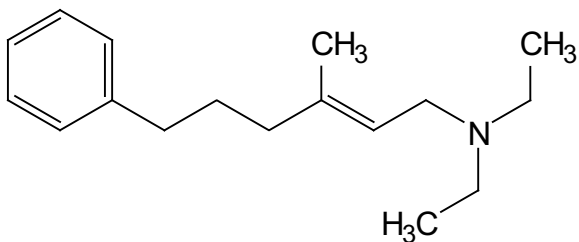

**5**

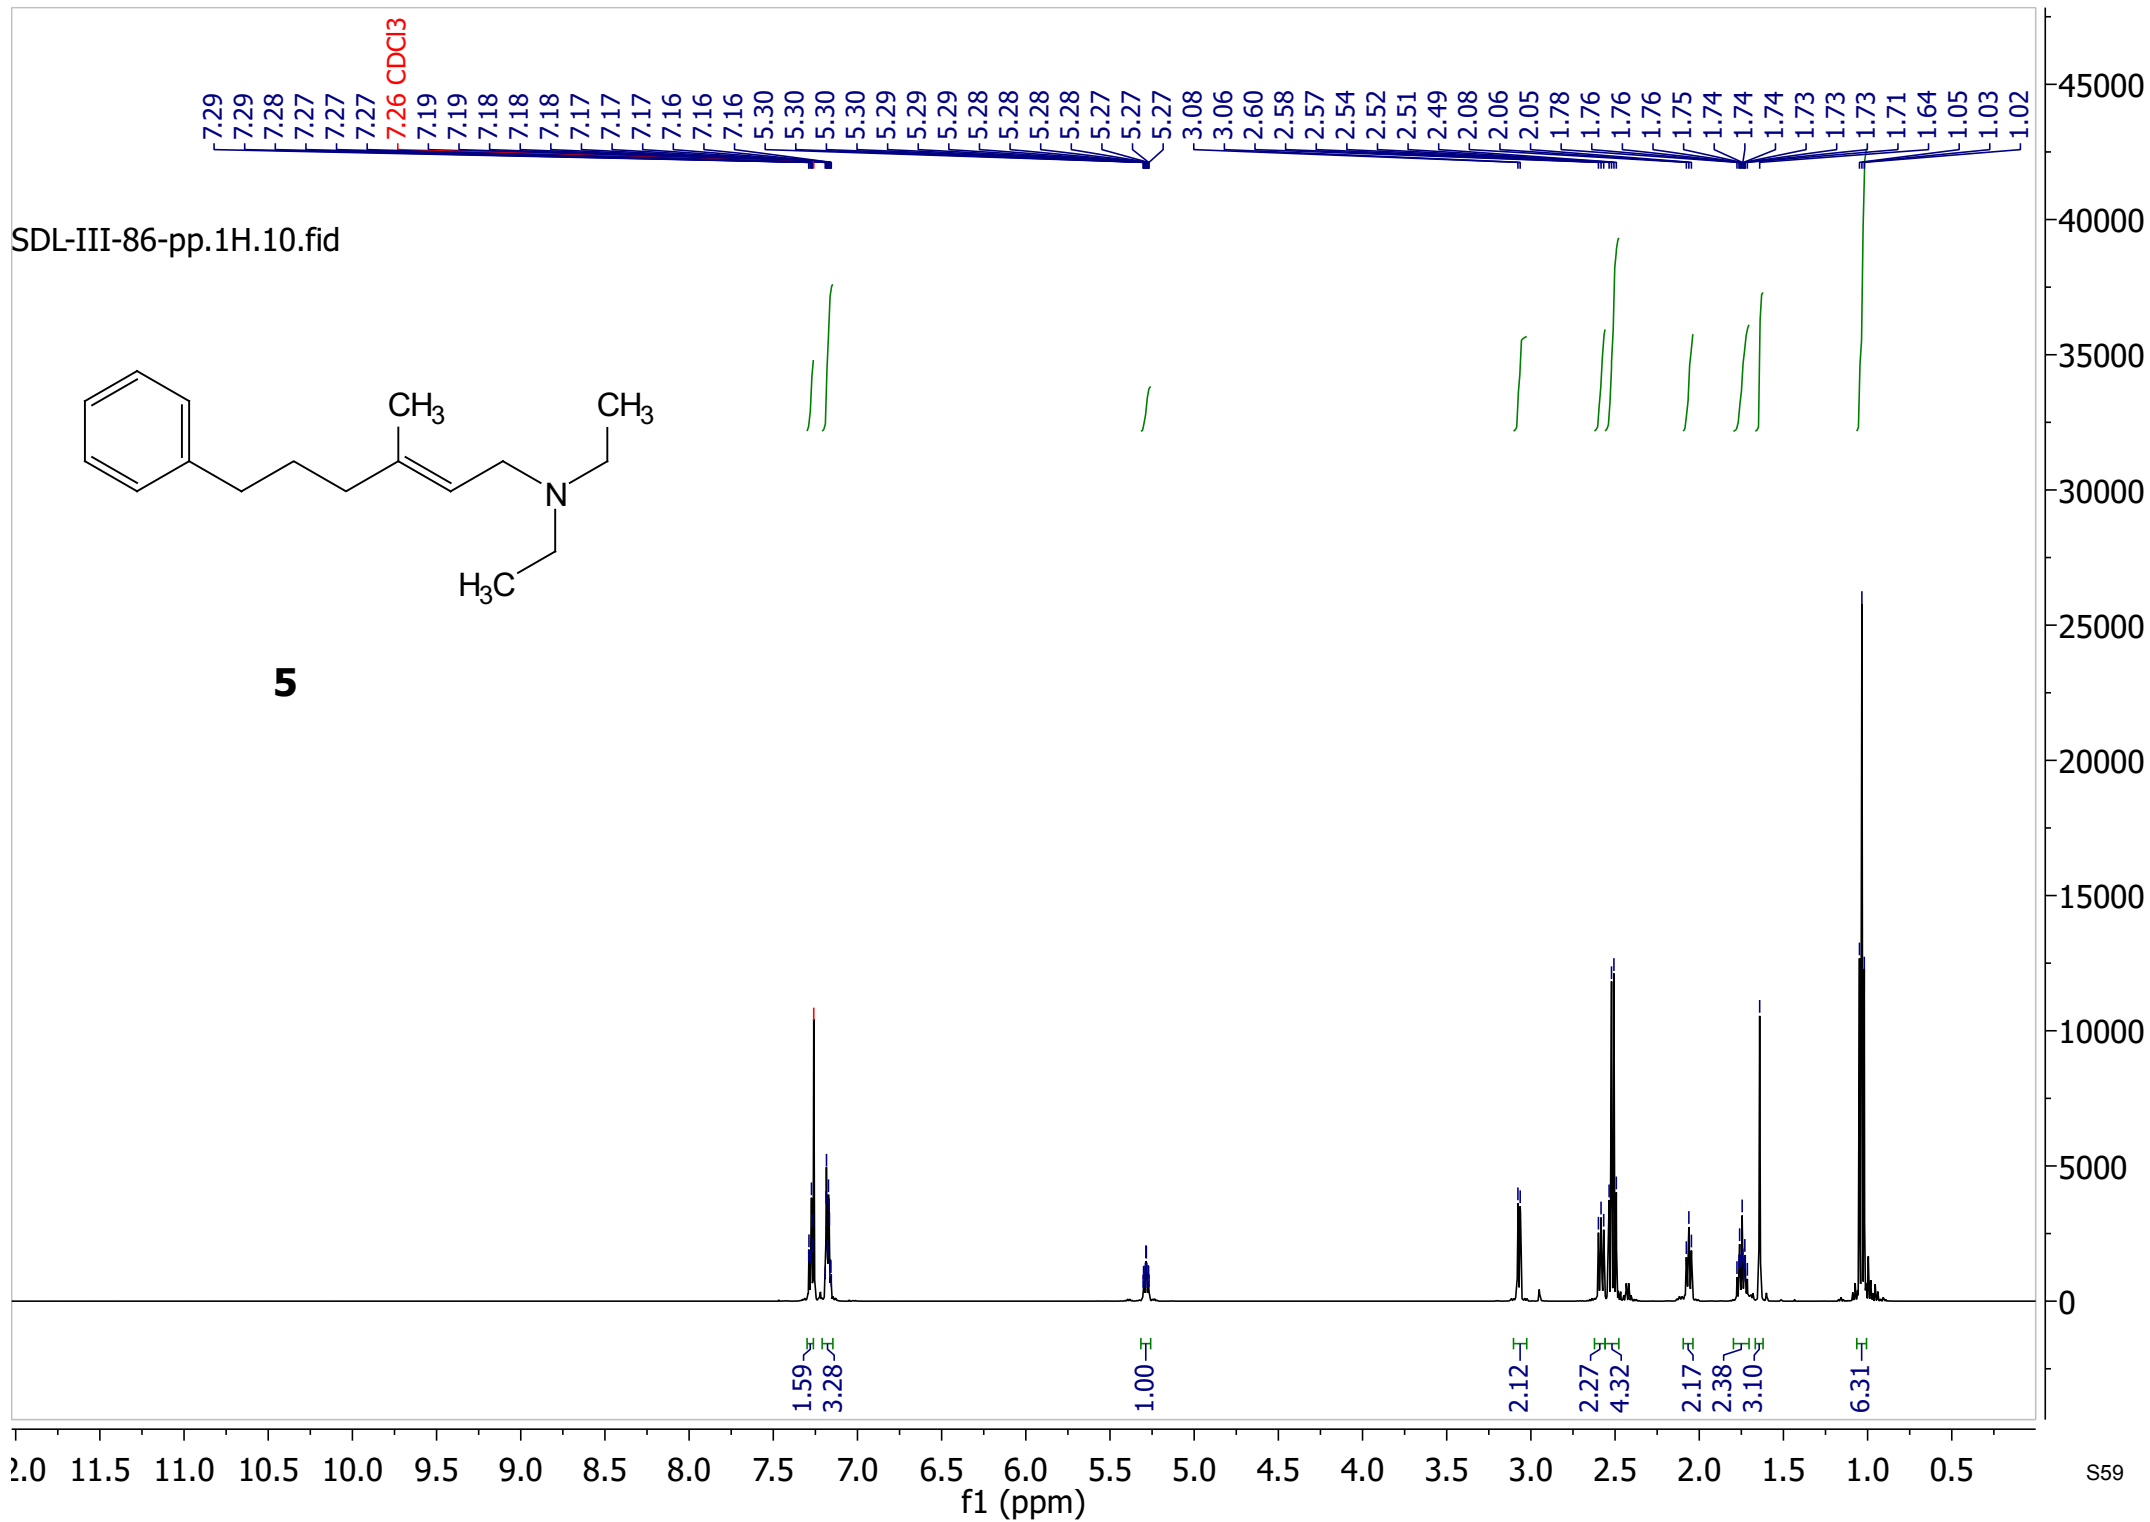

SDL-III-86-pp.13C.10.fid

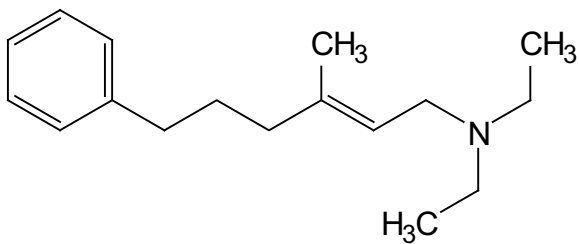

**5**

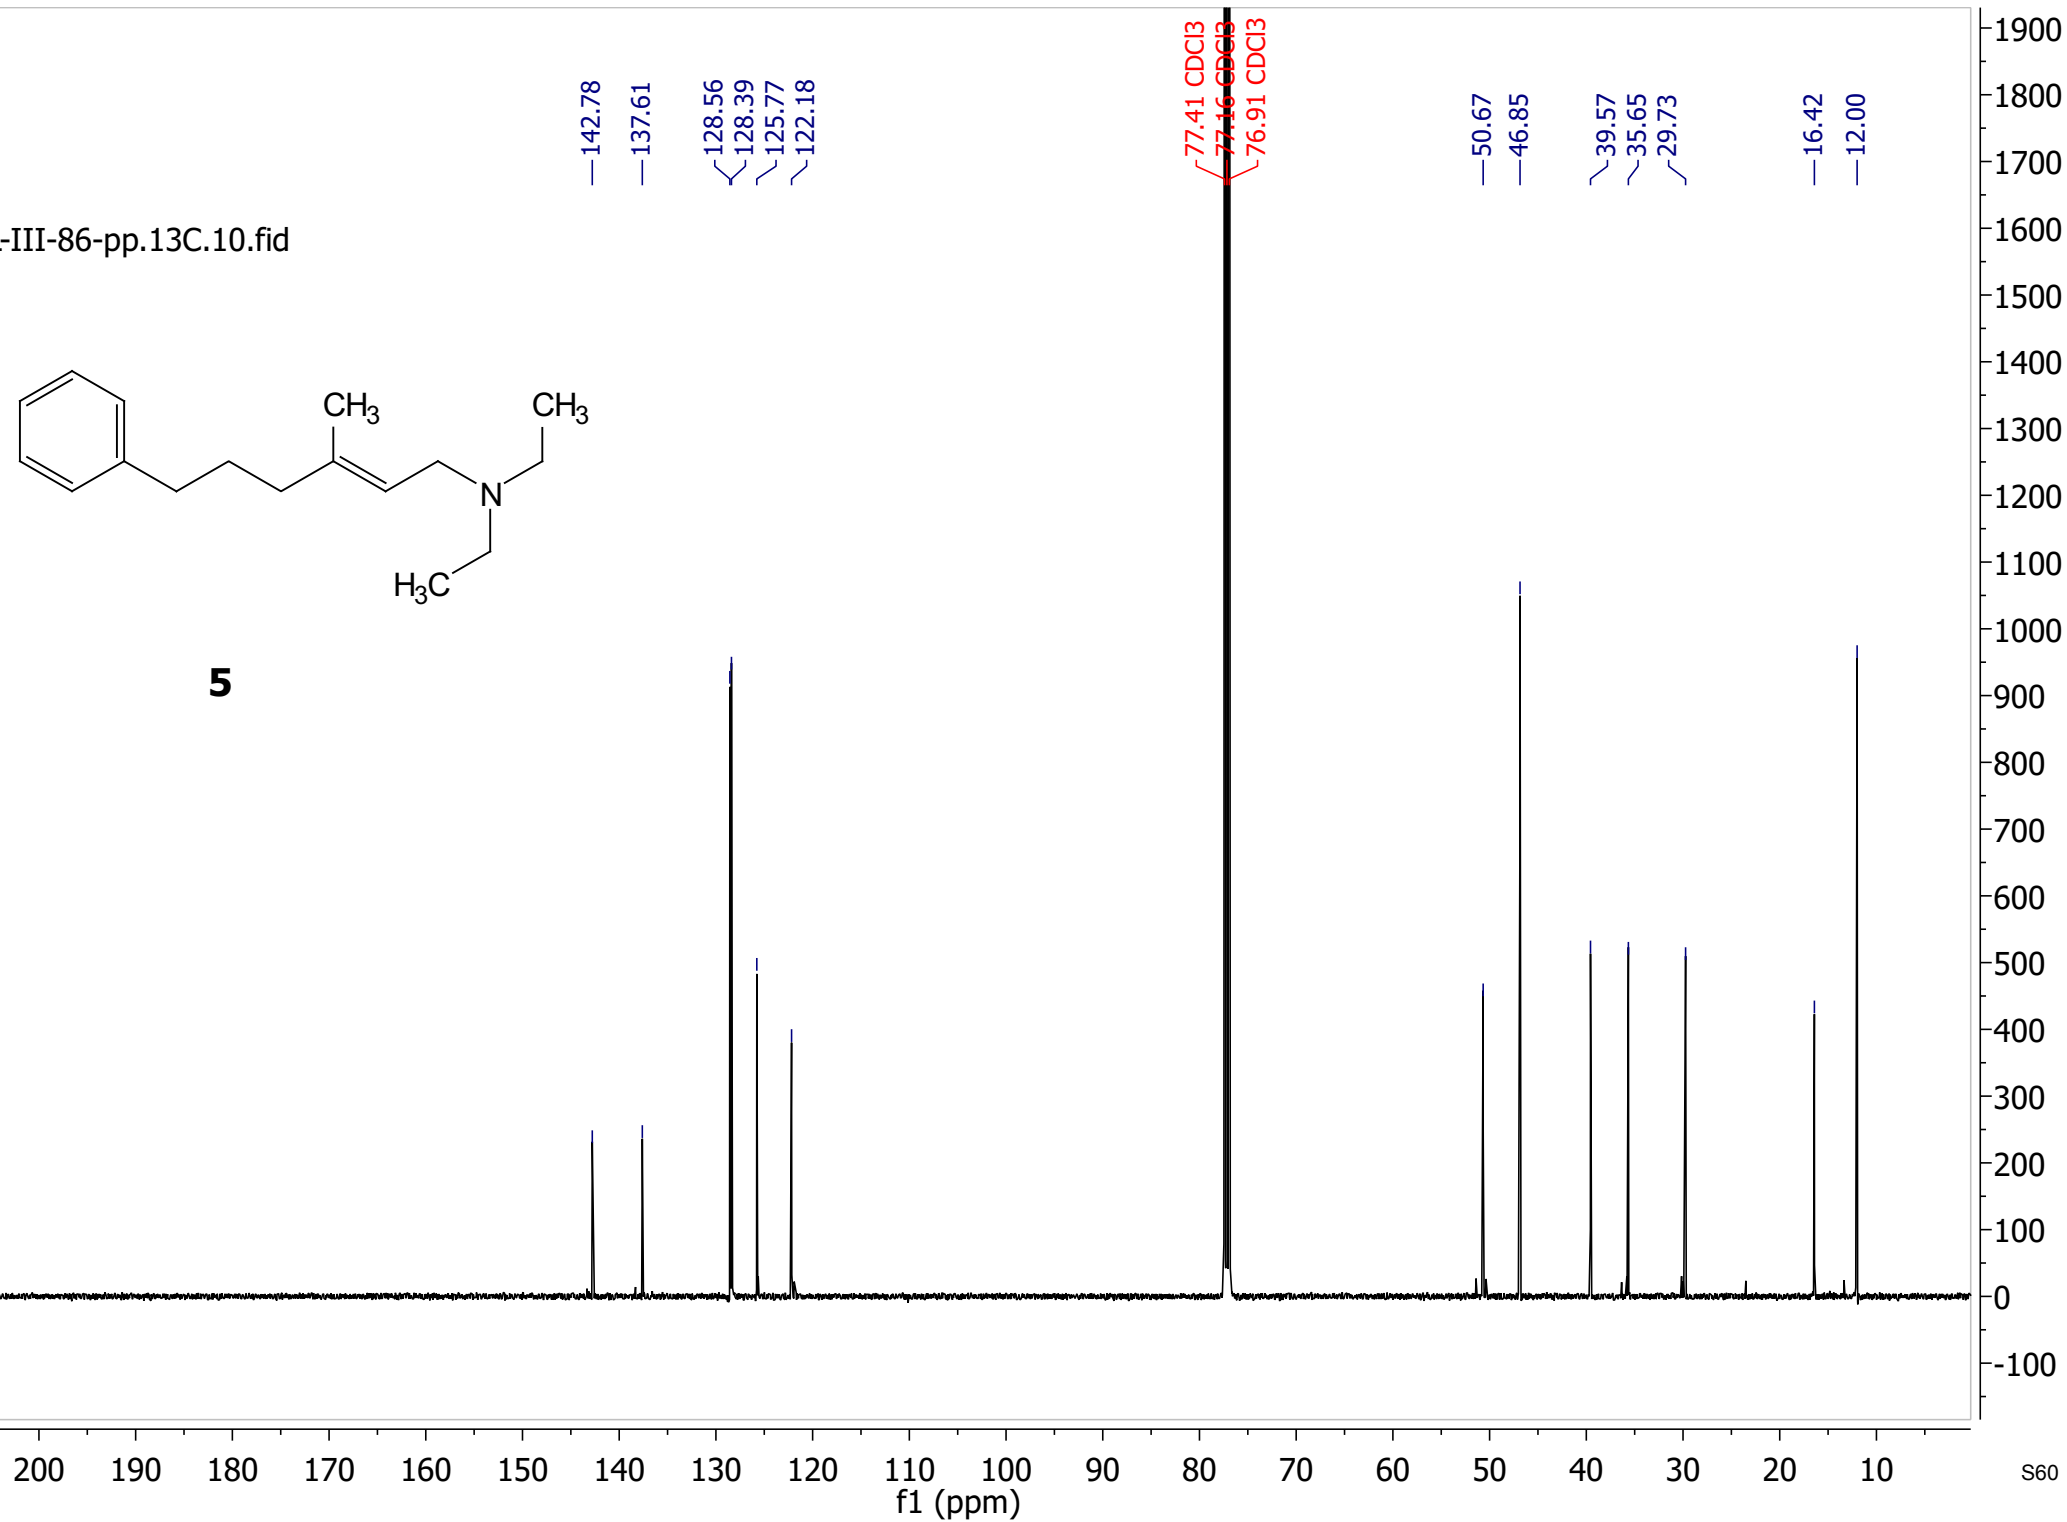

SDL-II-40-p.1H  
STANDARD PROTON PARAMETERS

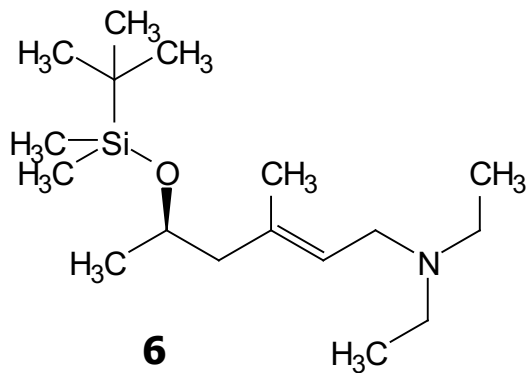

—7.26 CDCl<sub>3</sub>

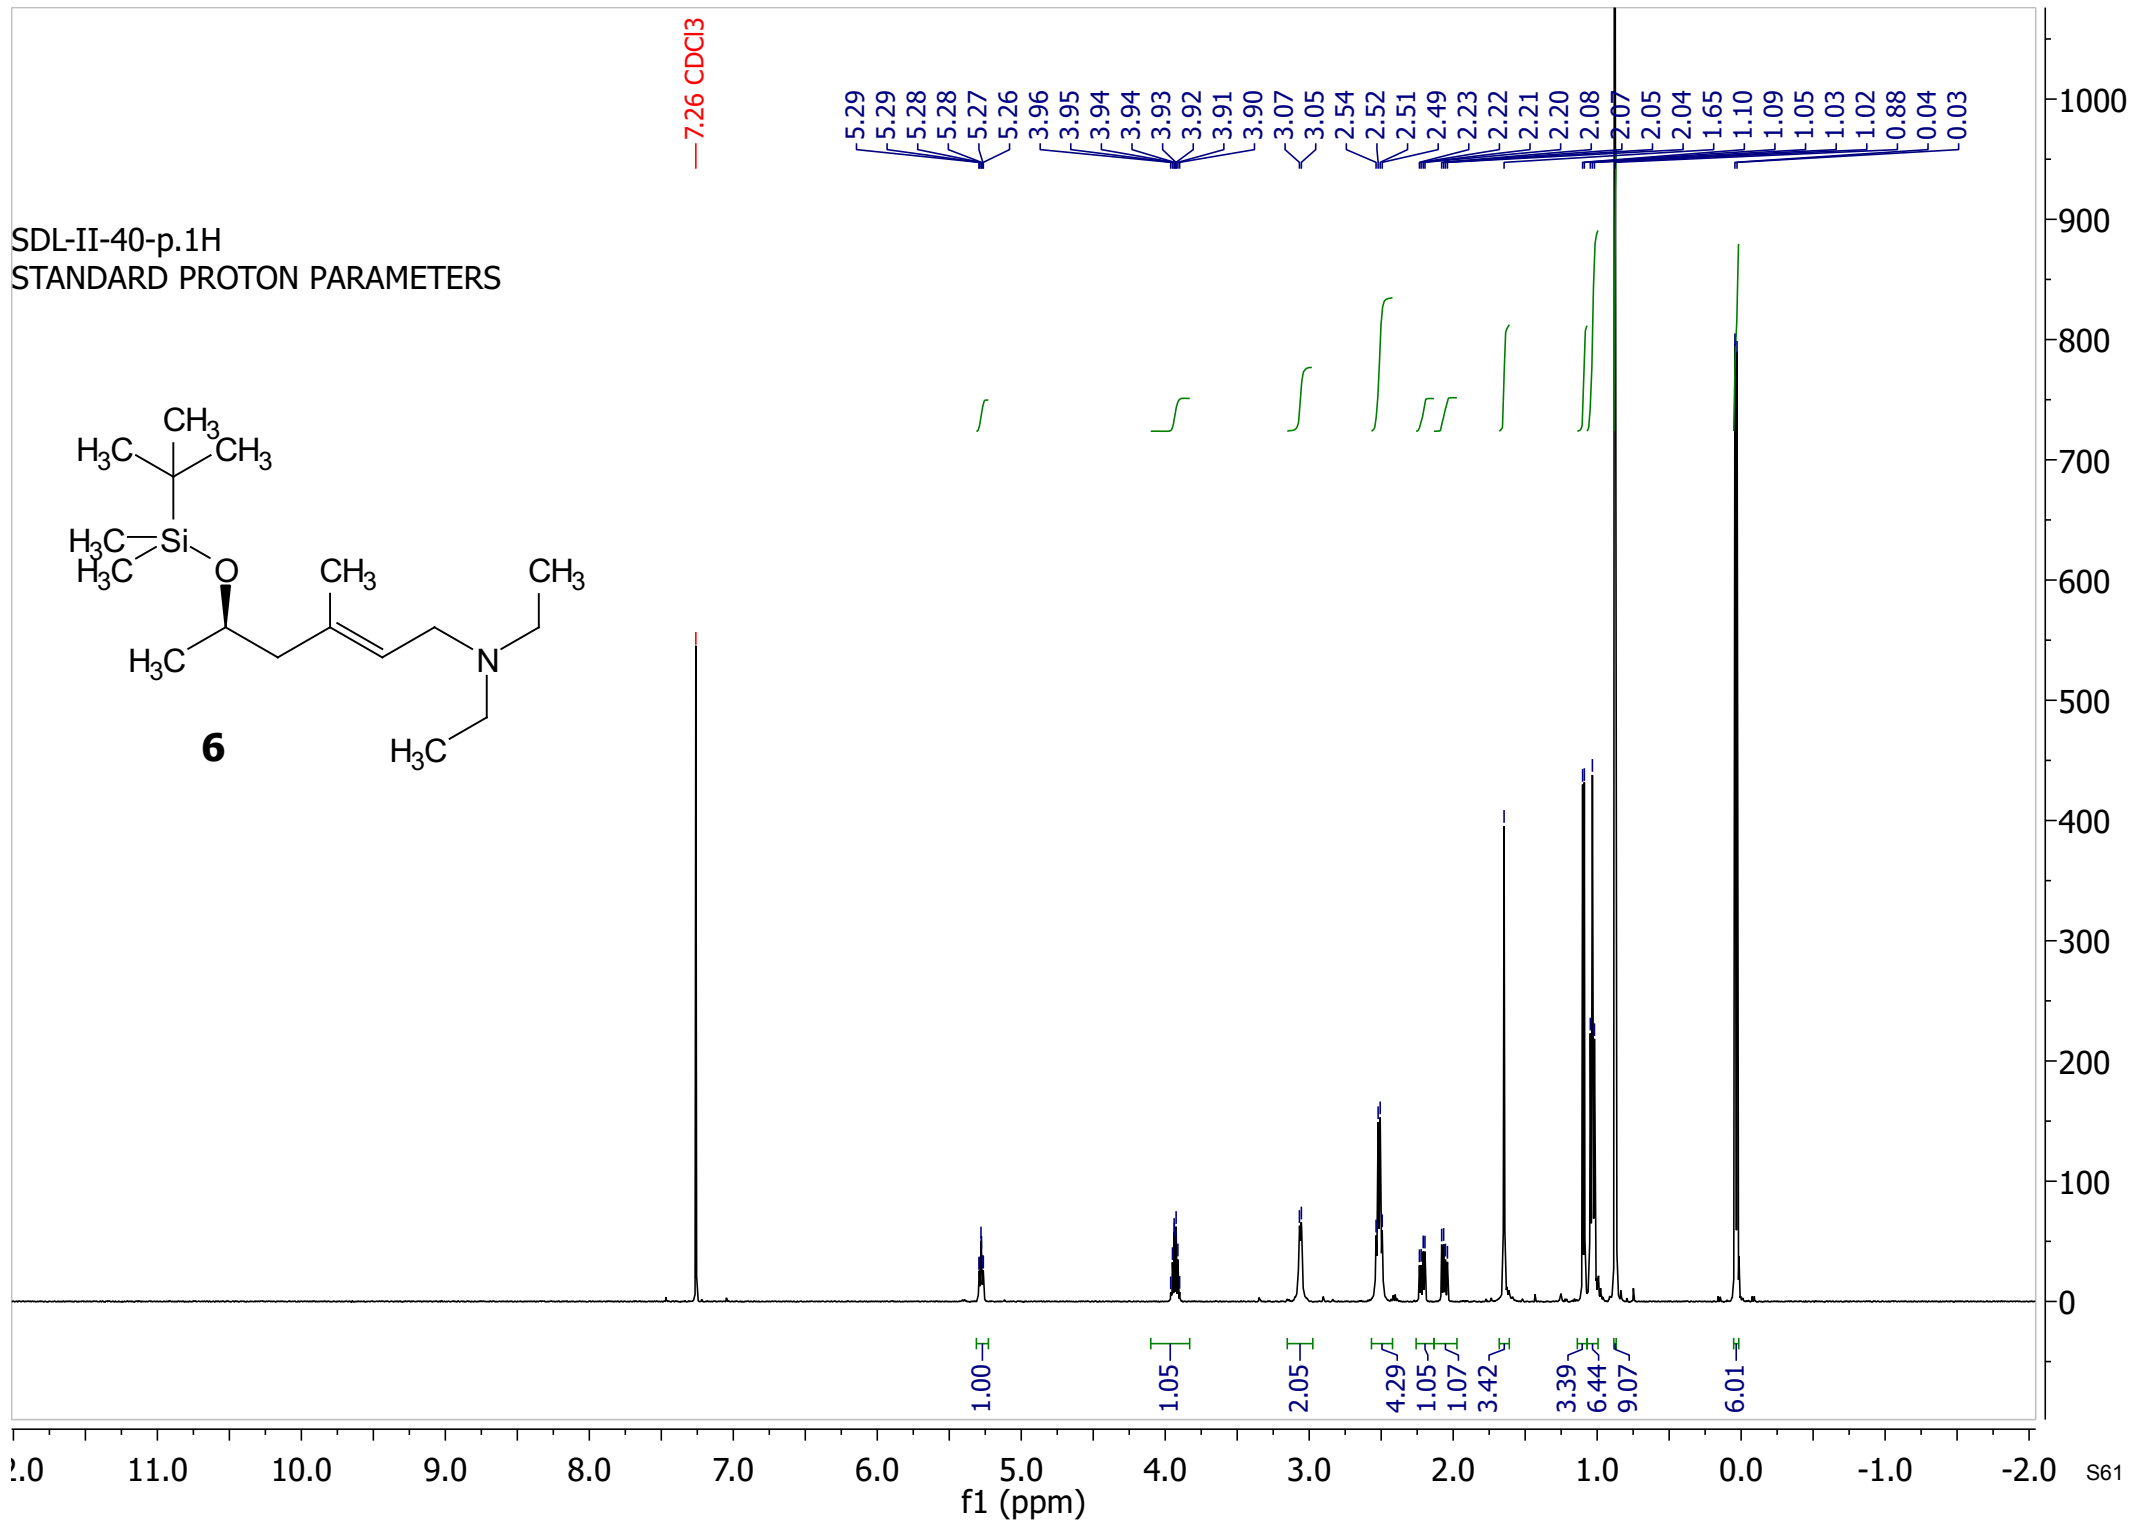

SDL-II-40-p.13C  
STANDARD CARBON PARAMETERS

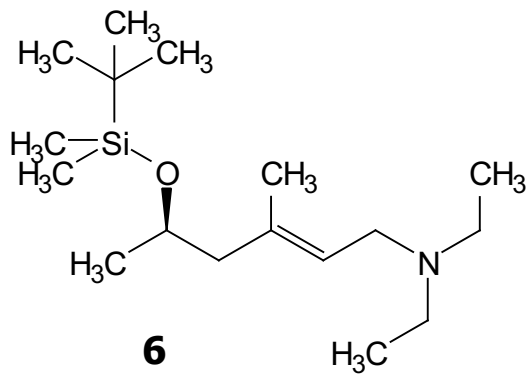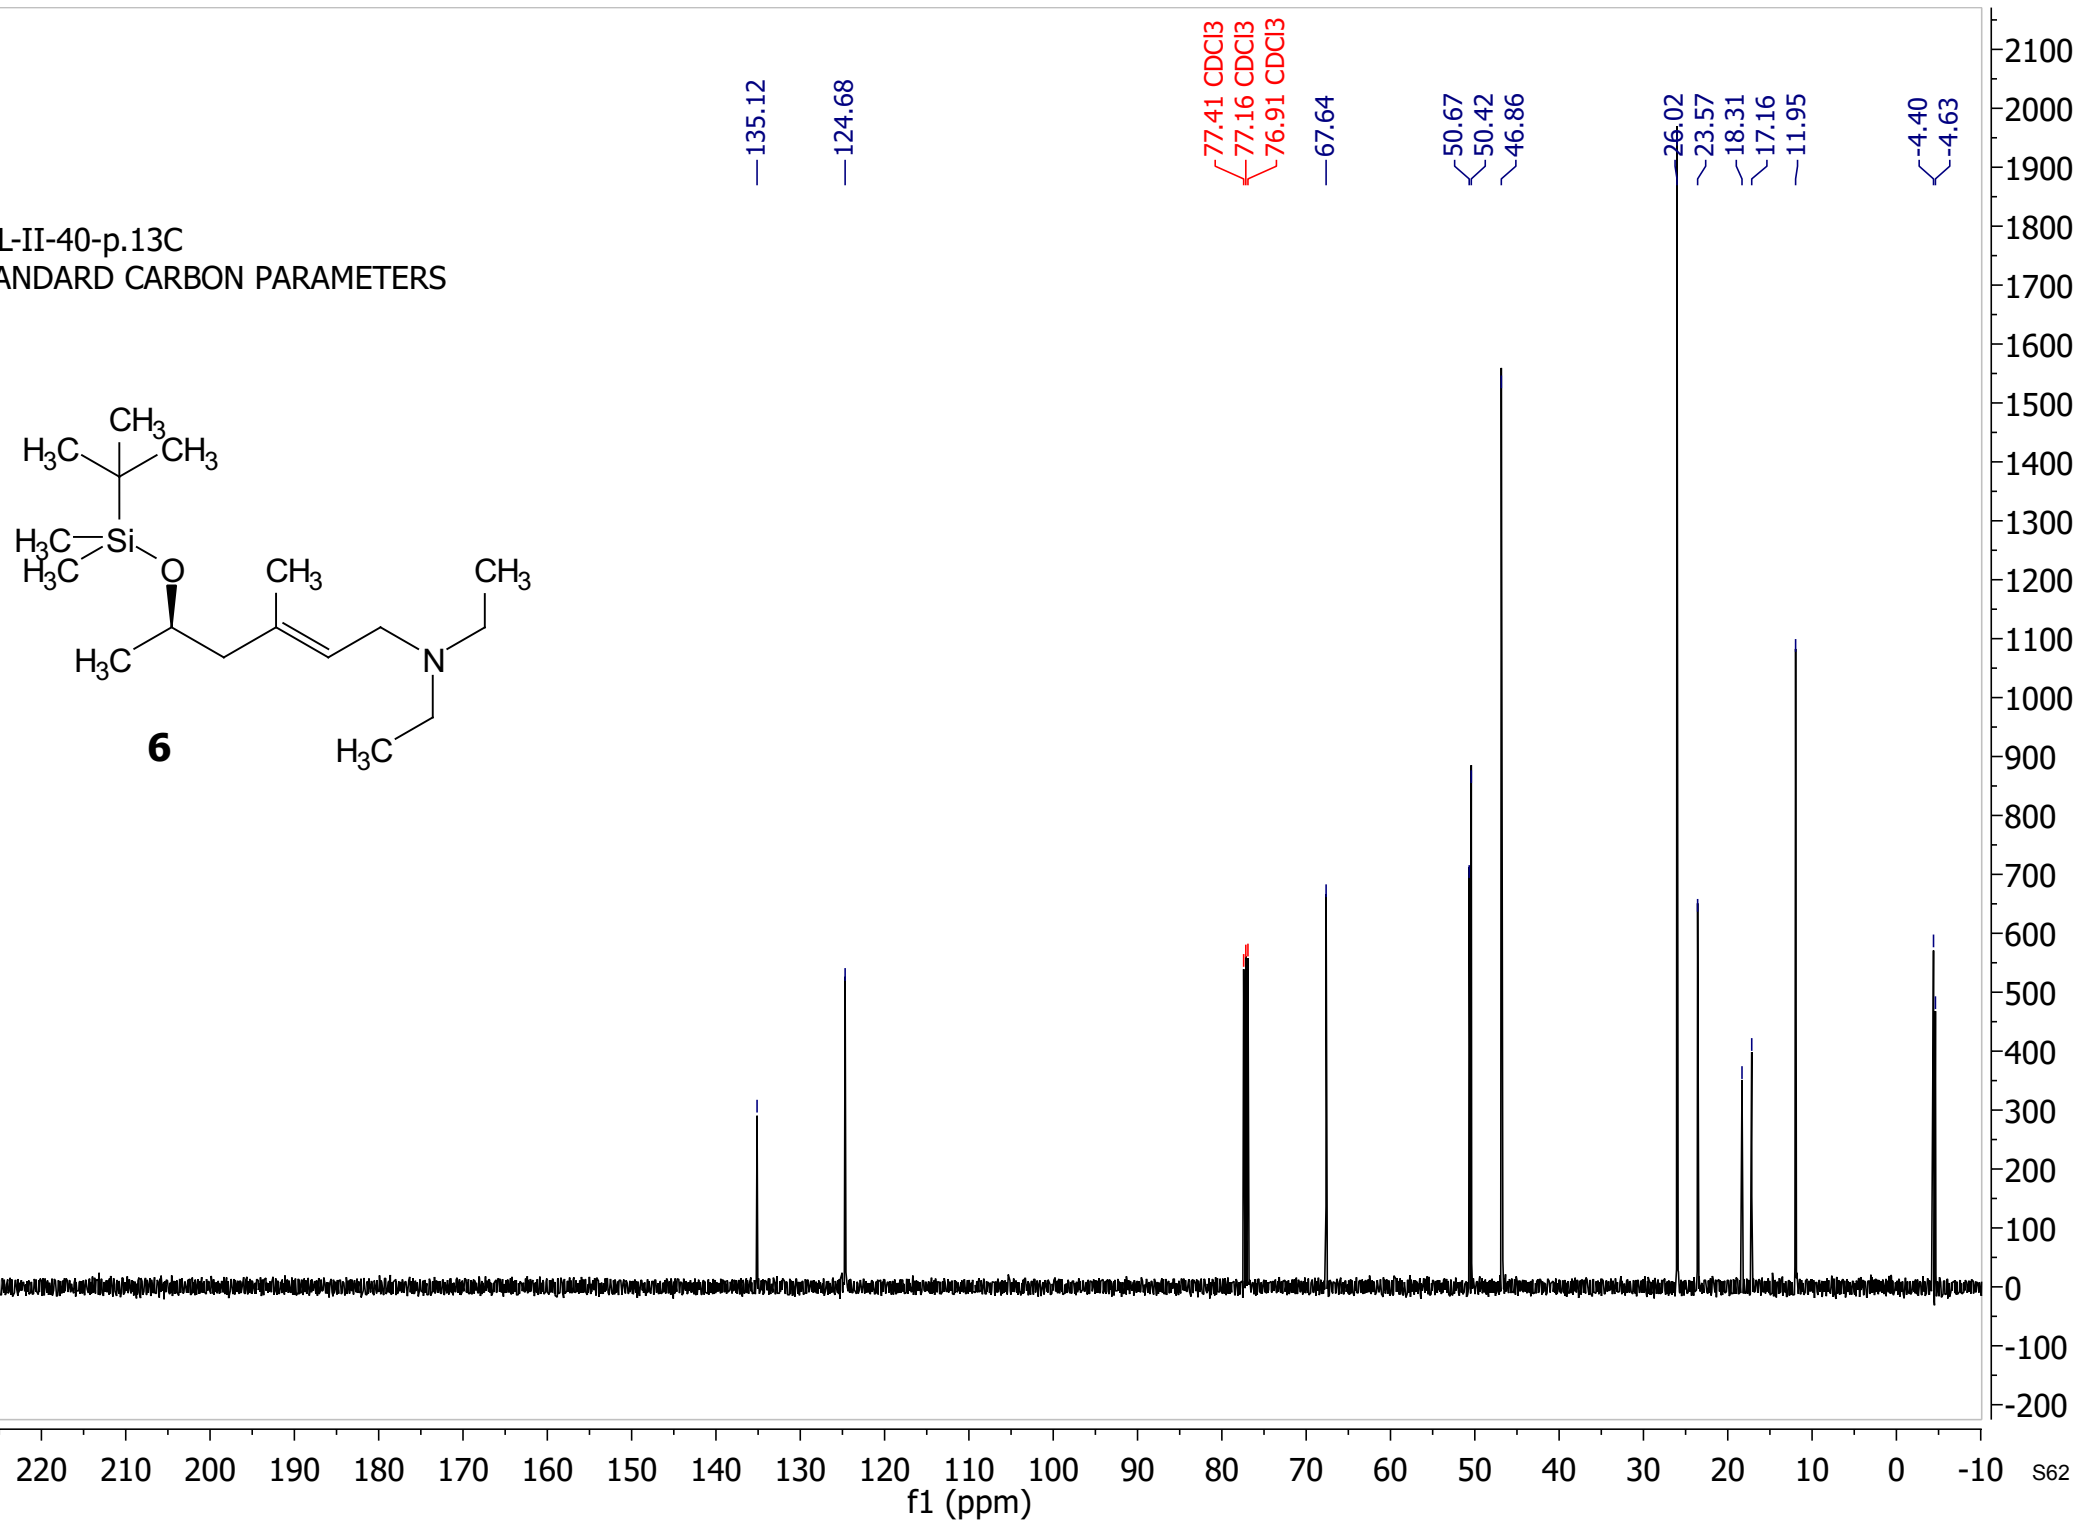

SDL-II-136-pp.1H.10.fid

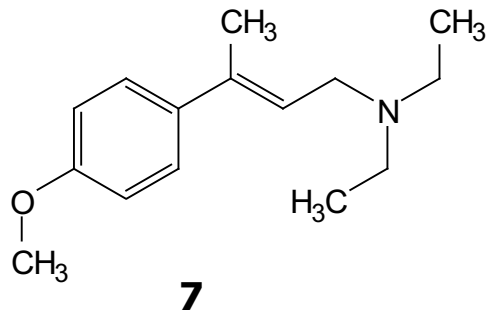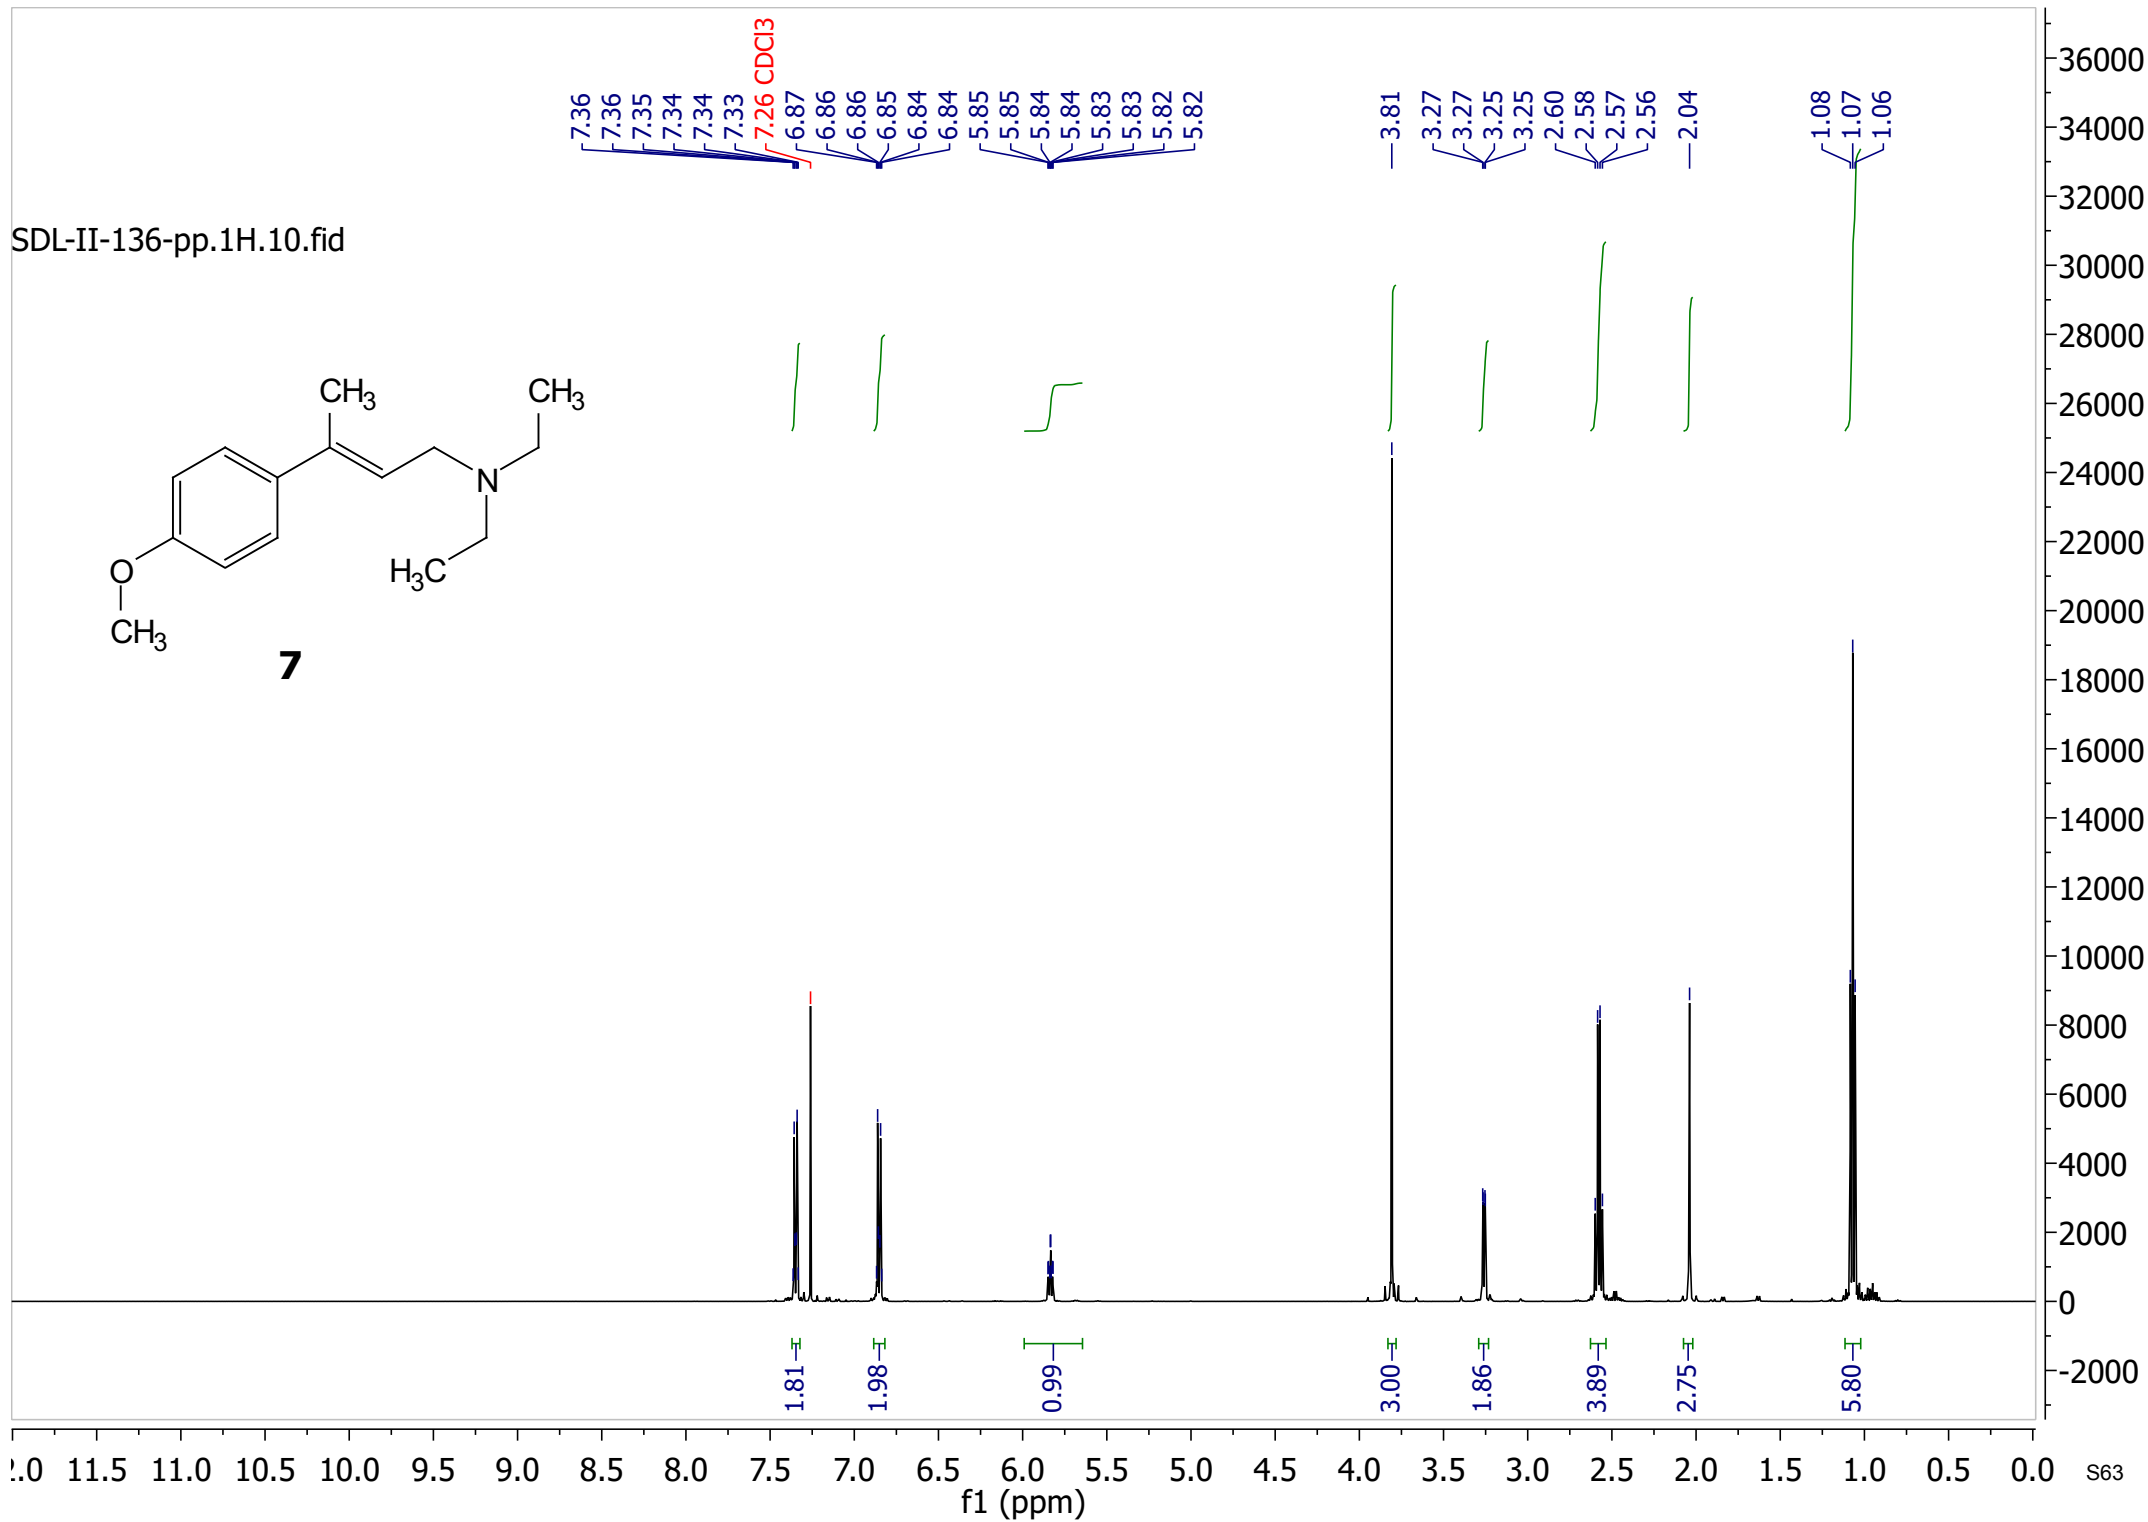

SDL-II-136-pp.13C.10.fid

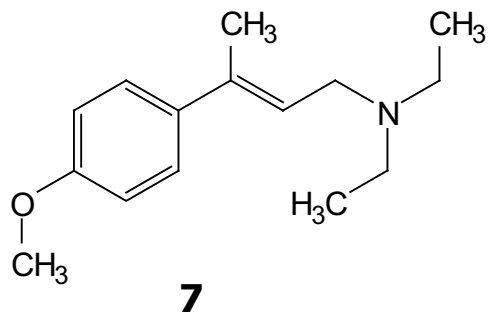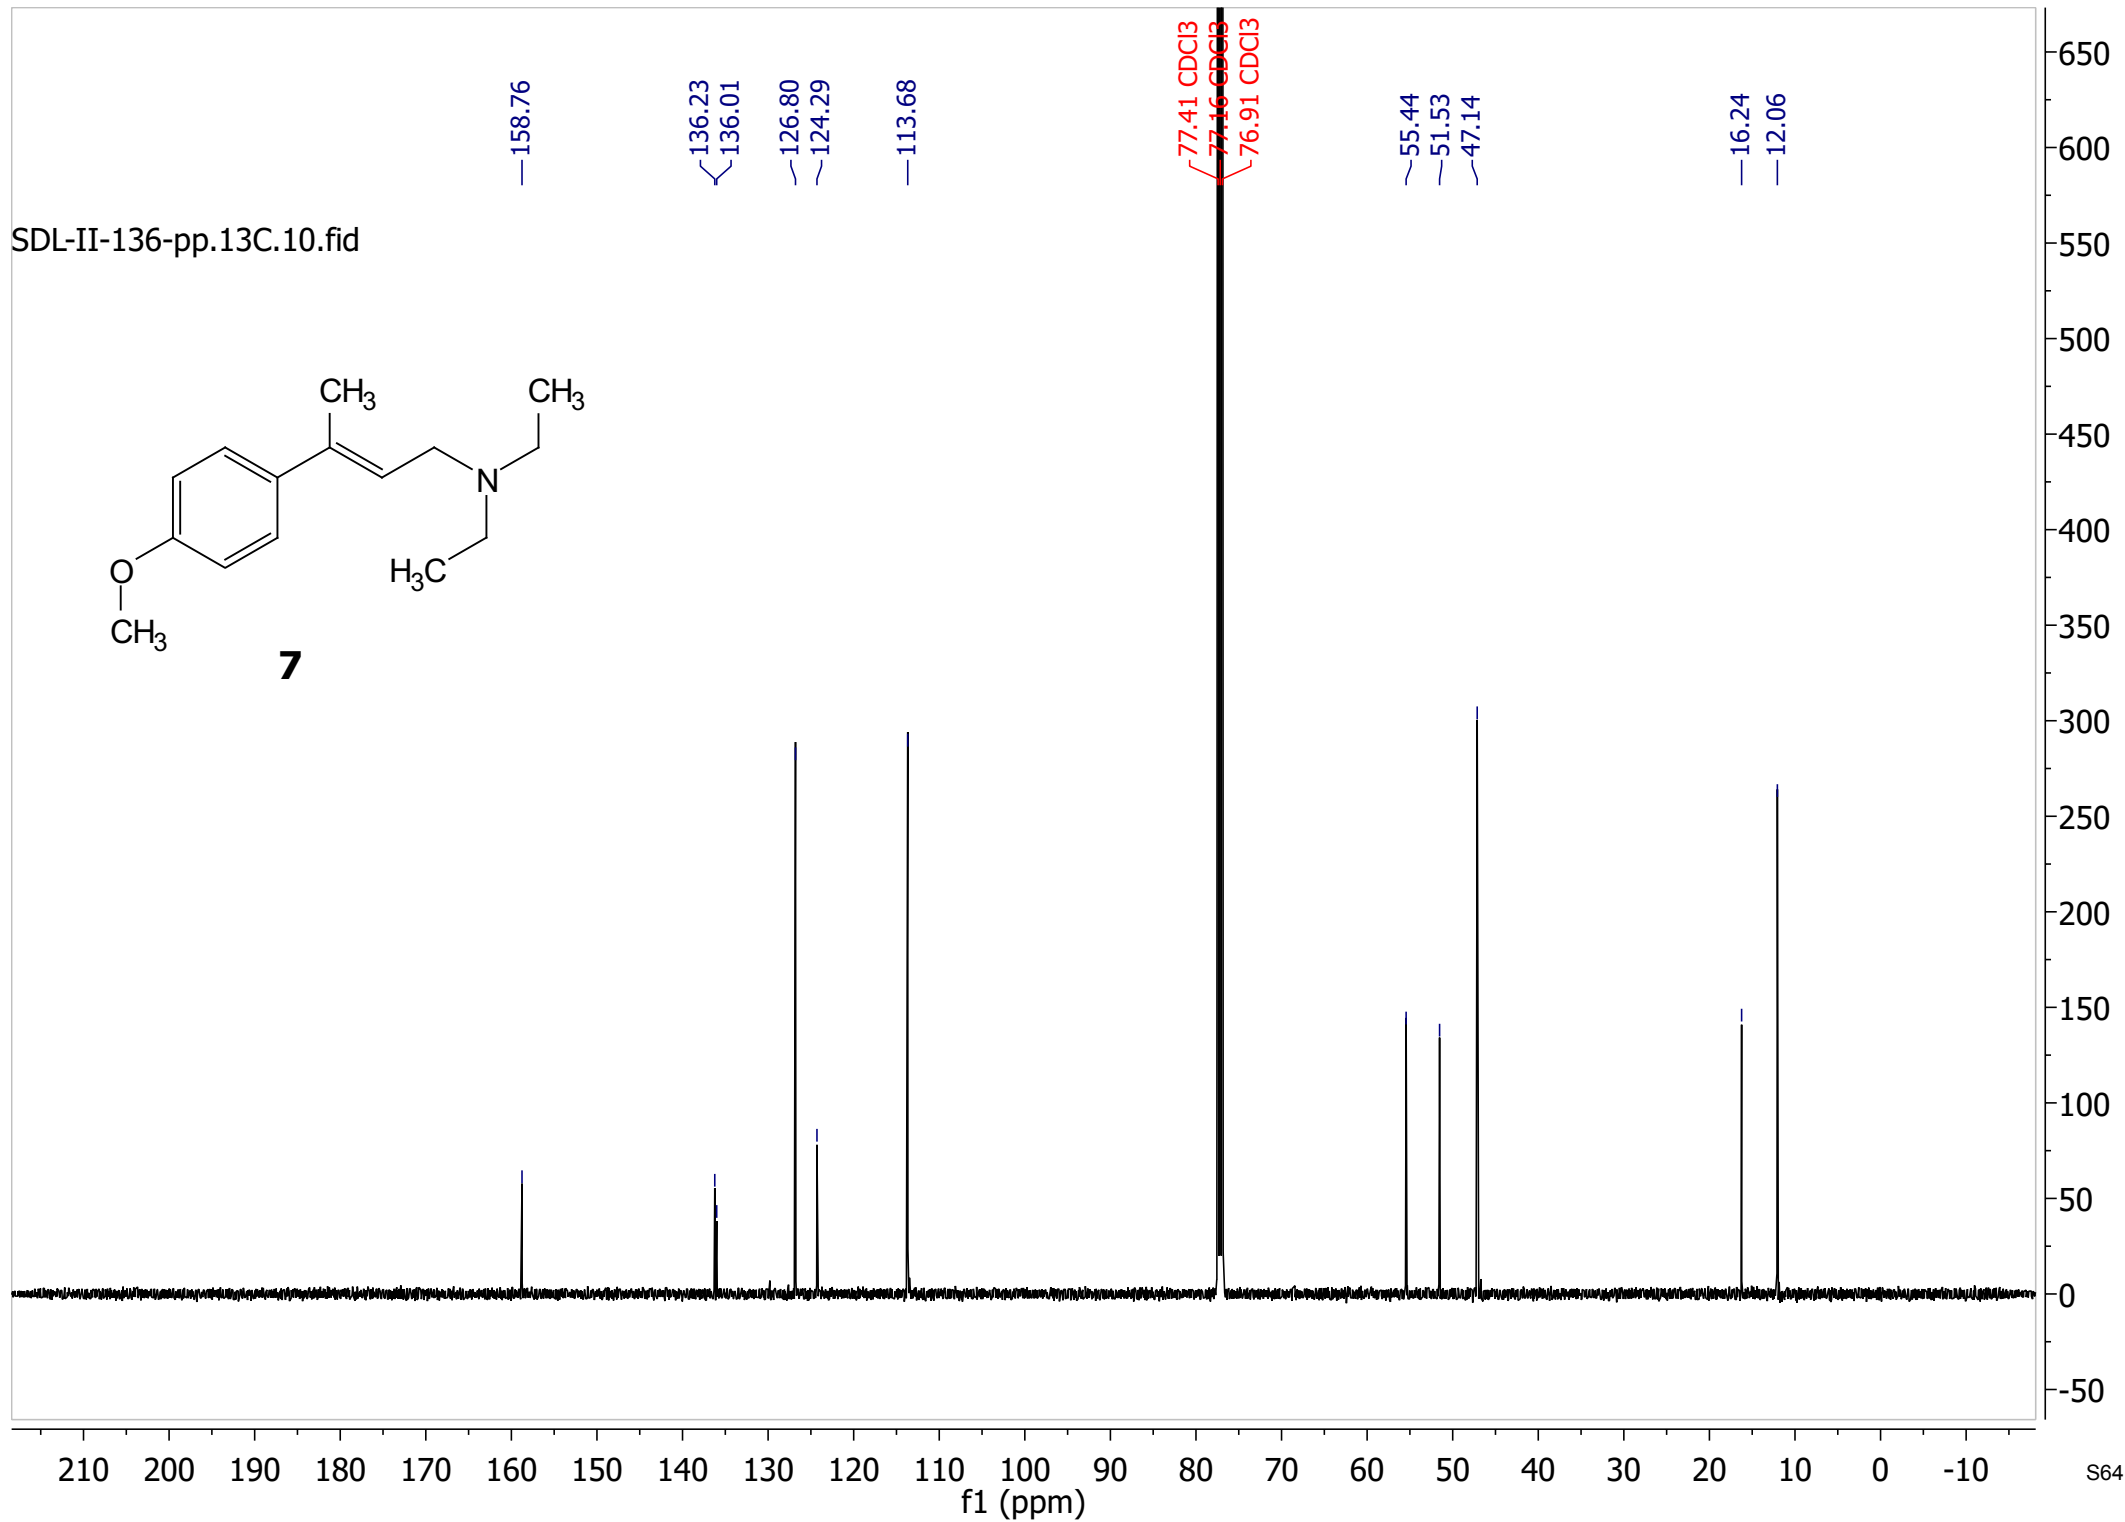



SDL-II-204-pp.1H.10.fid

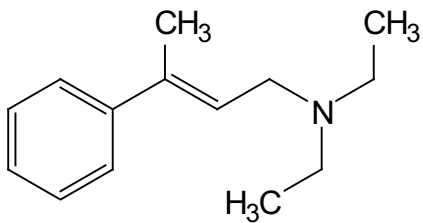

**8**

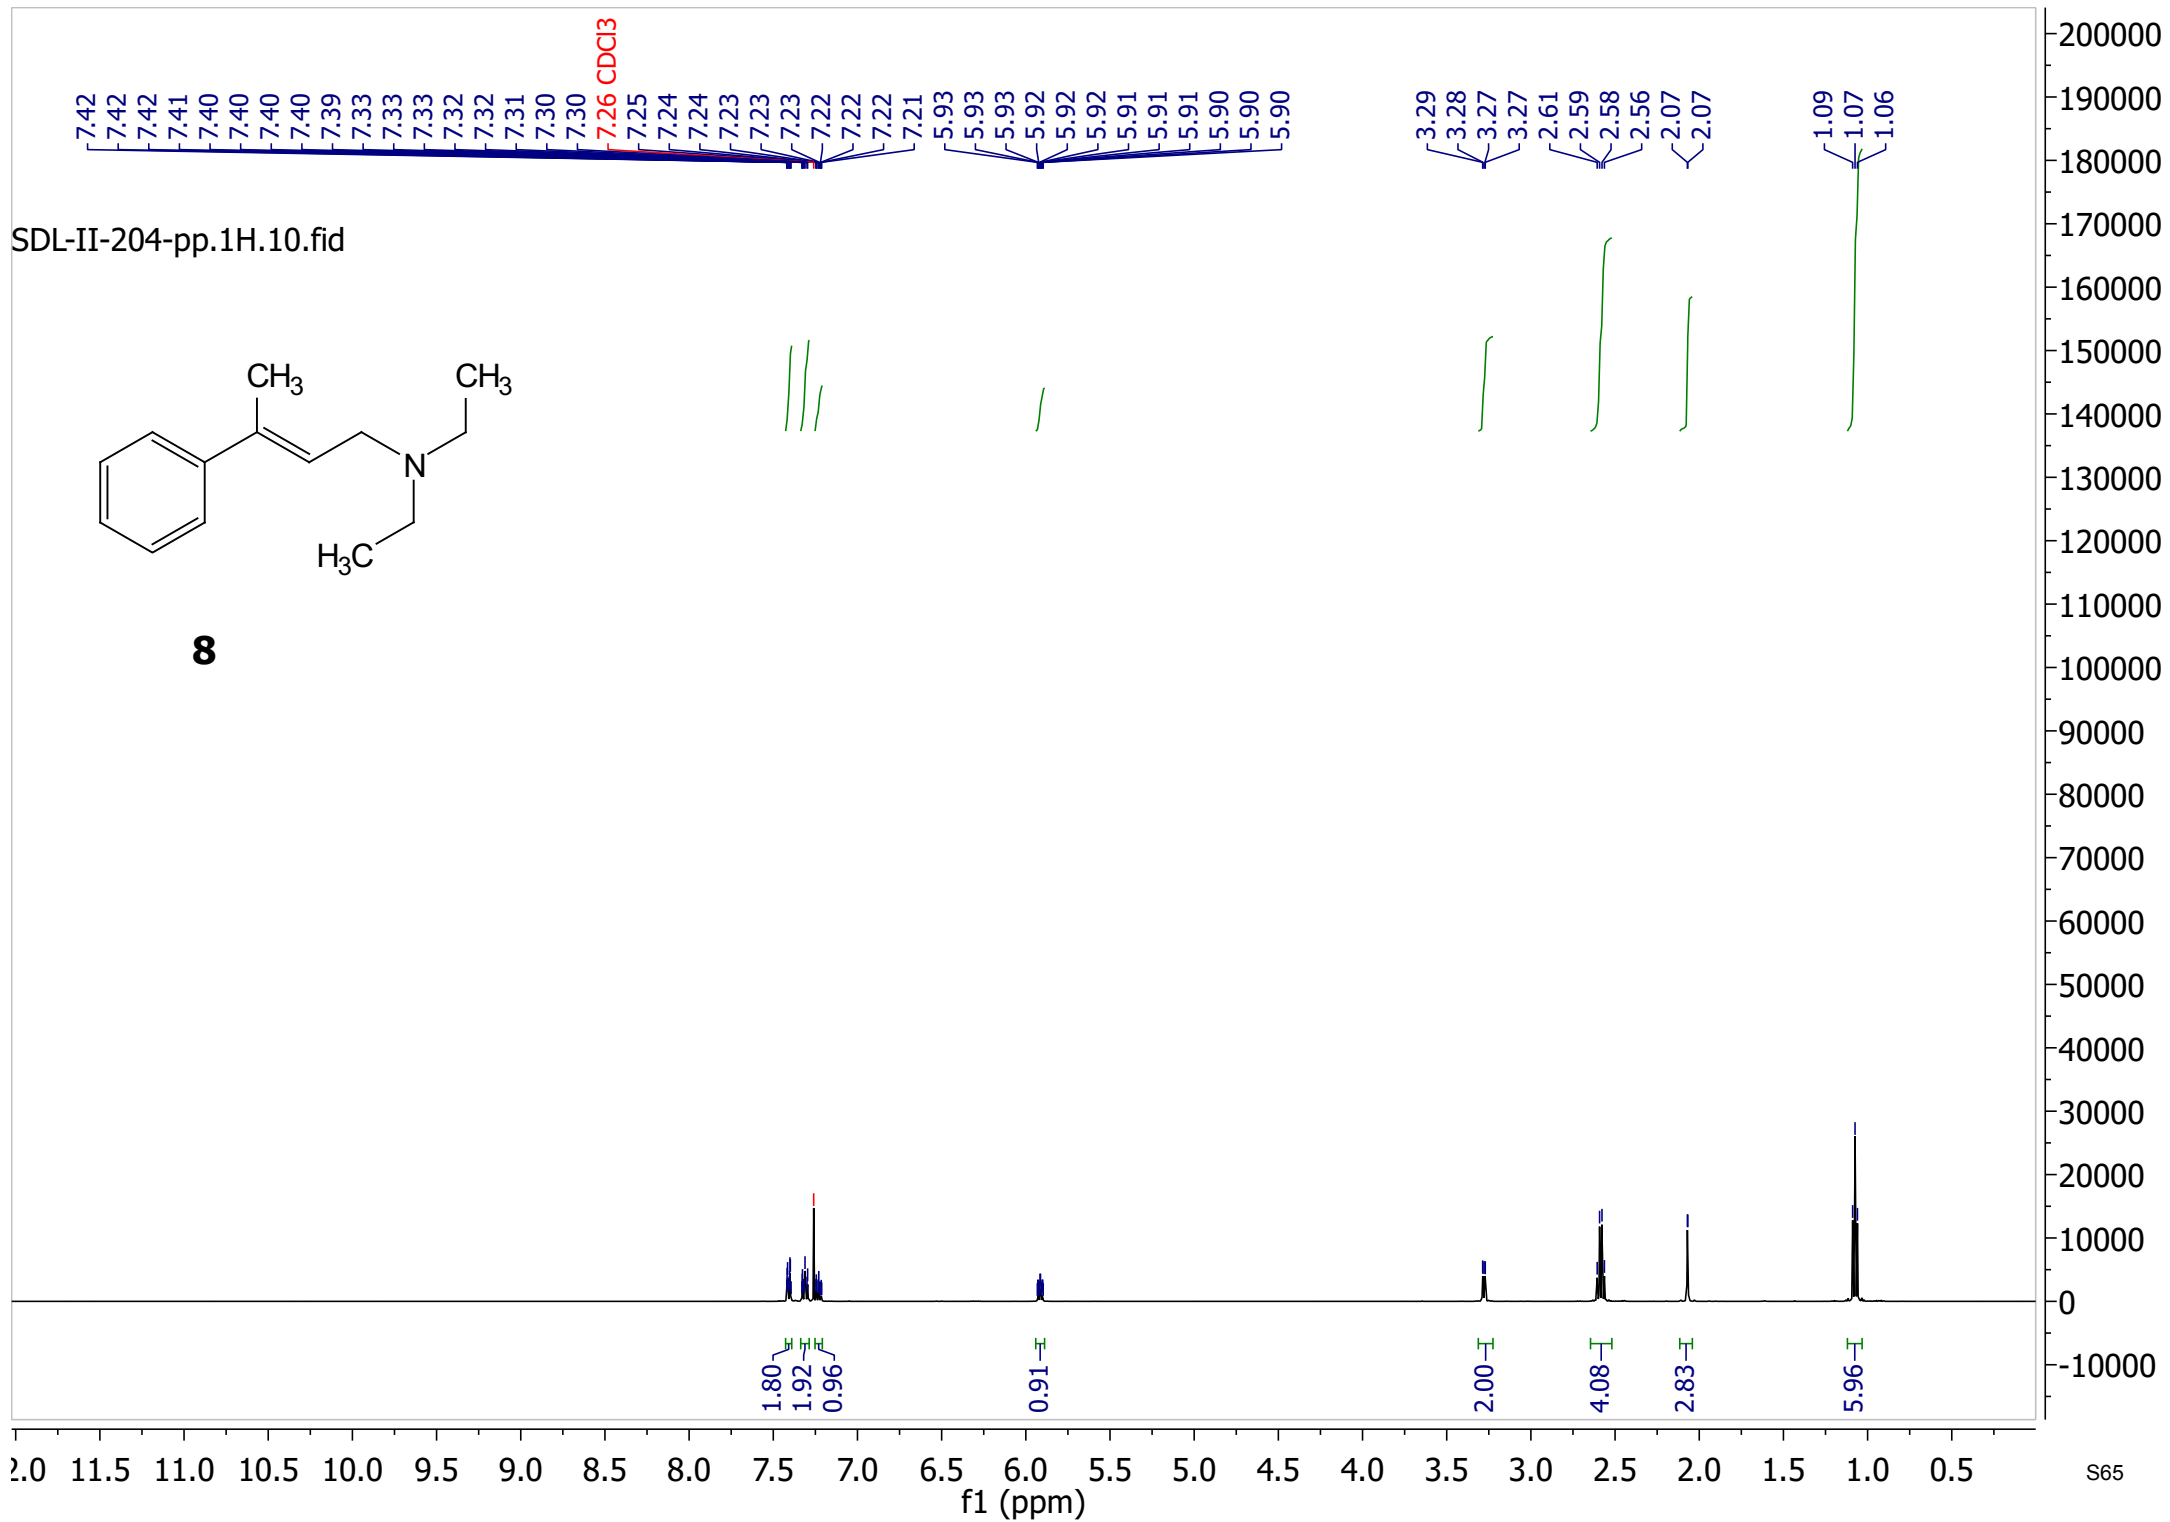

SDL-II-204-pp.13C.10.fid

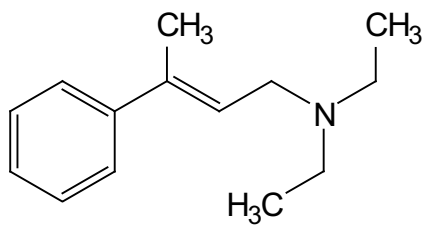

**8**

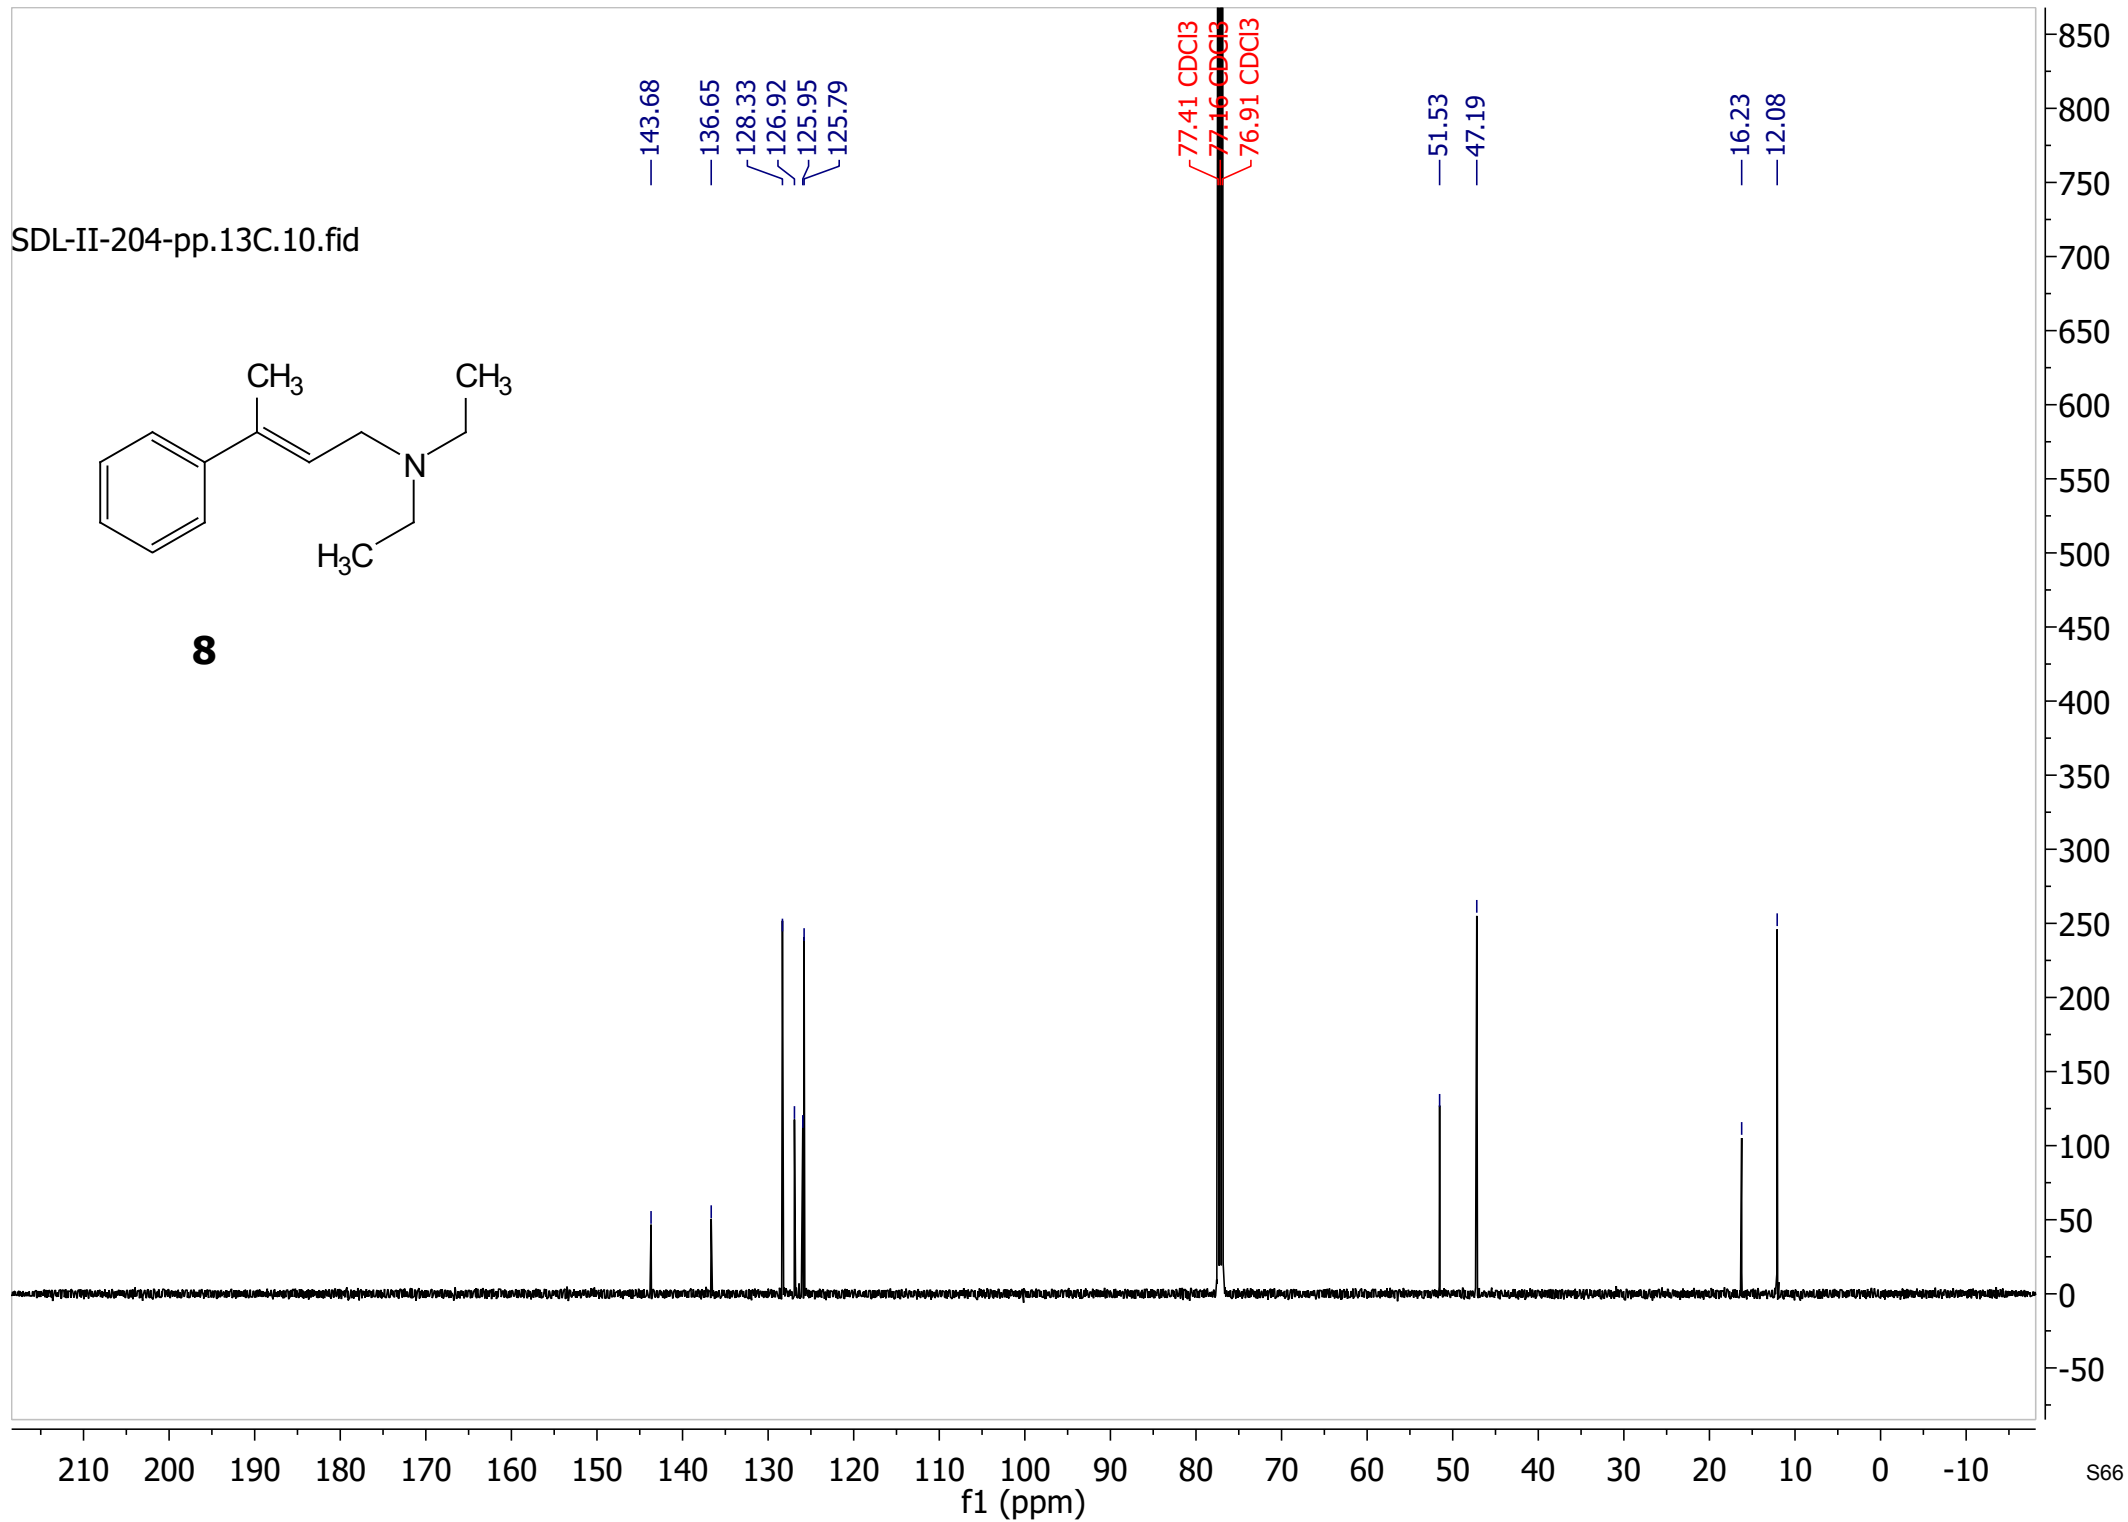

zwu5-79-HNMR  
STANDARD PROTON PARAMETERS

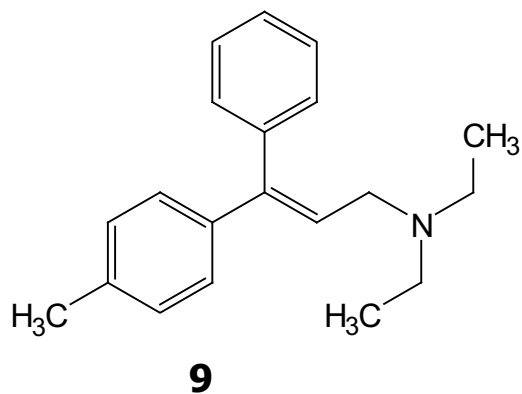

7.38  
7.38  
7.37  
7.36  
7.36  
7.35  
7.35  
7.33  
7.33  
7.32  
7.31  
7.26 CDCl3  
7.17  
7.16  
7.16  
7.15  
7.15  
7.15  
7.15  
7.15  
7.14  
7.13  
7.13  
7.08  
7.08  
7.08  
7.07  
7.07  
7.07  
7.07  
6.21  
6.19  
6.18

3.16  
3.14  
2.55  
2.53  
2.52  
2.50  
2.32

0.98  
0.96  
0.95

1.92  
1.02  
3.84  
1.90

0.99

2.00

4.12  
2.91

6.05

DCM

11.5 11.0 10.5 10.0 9.5 9.0 8.5 8.0 7.5 7.0 6.5 6.0 5.5 5.0 4.5 4.0 3.5 3.0 2.5 2.0 1.5 1.0 0.5

f1 (ppm)

ZW5-79-CNMR.10.fid

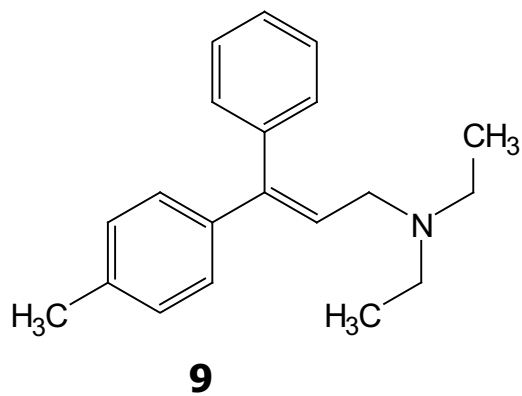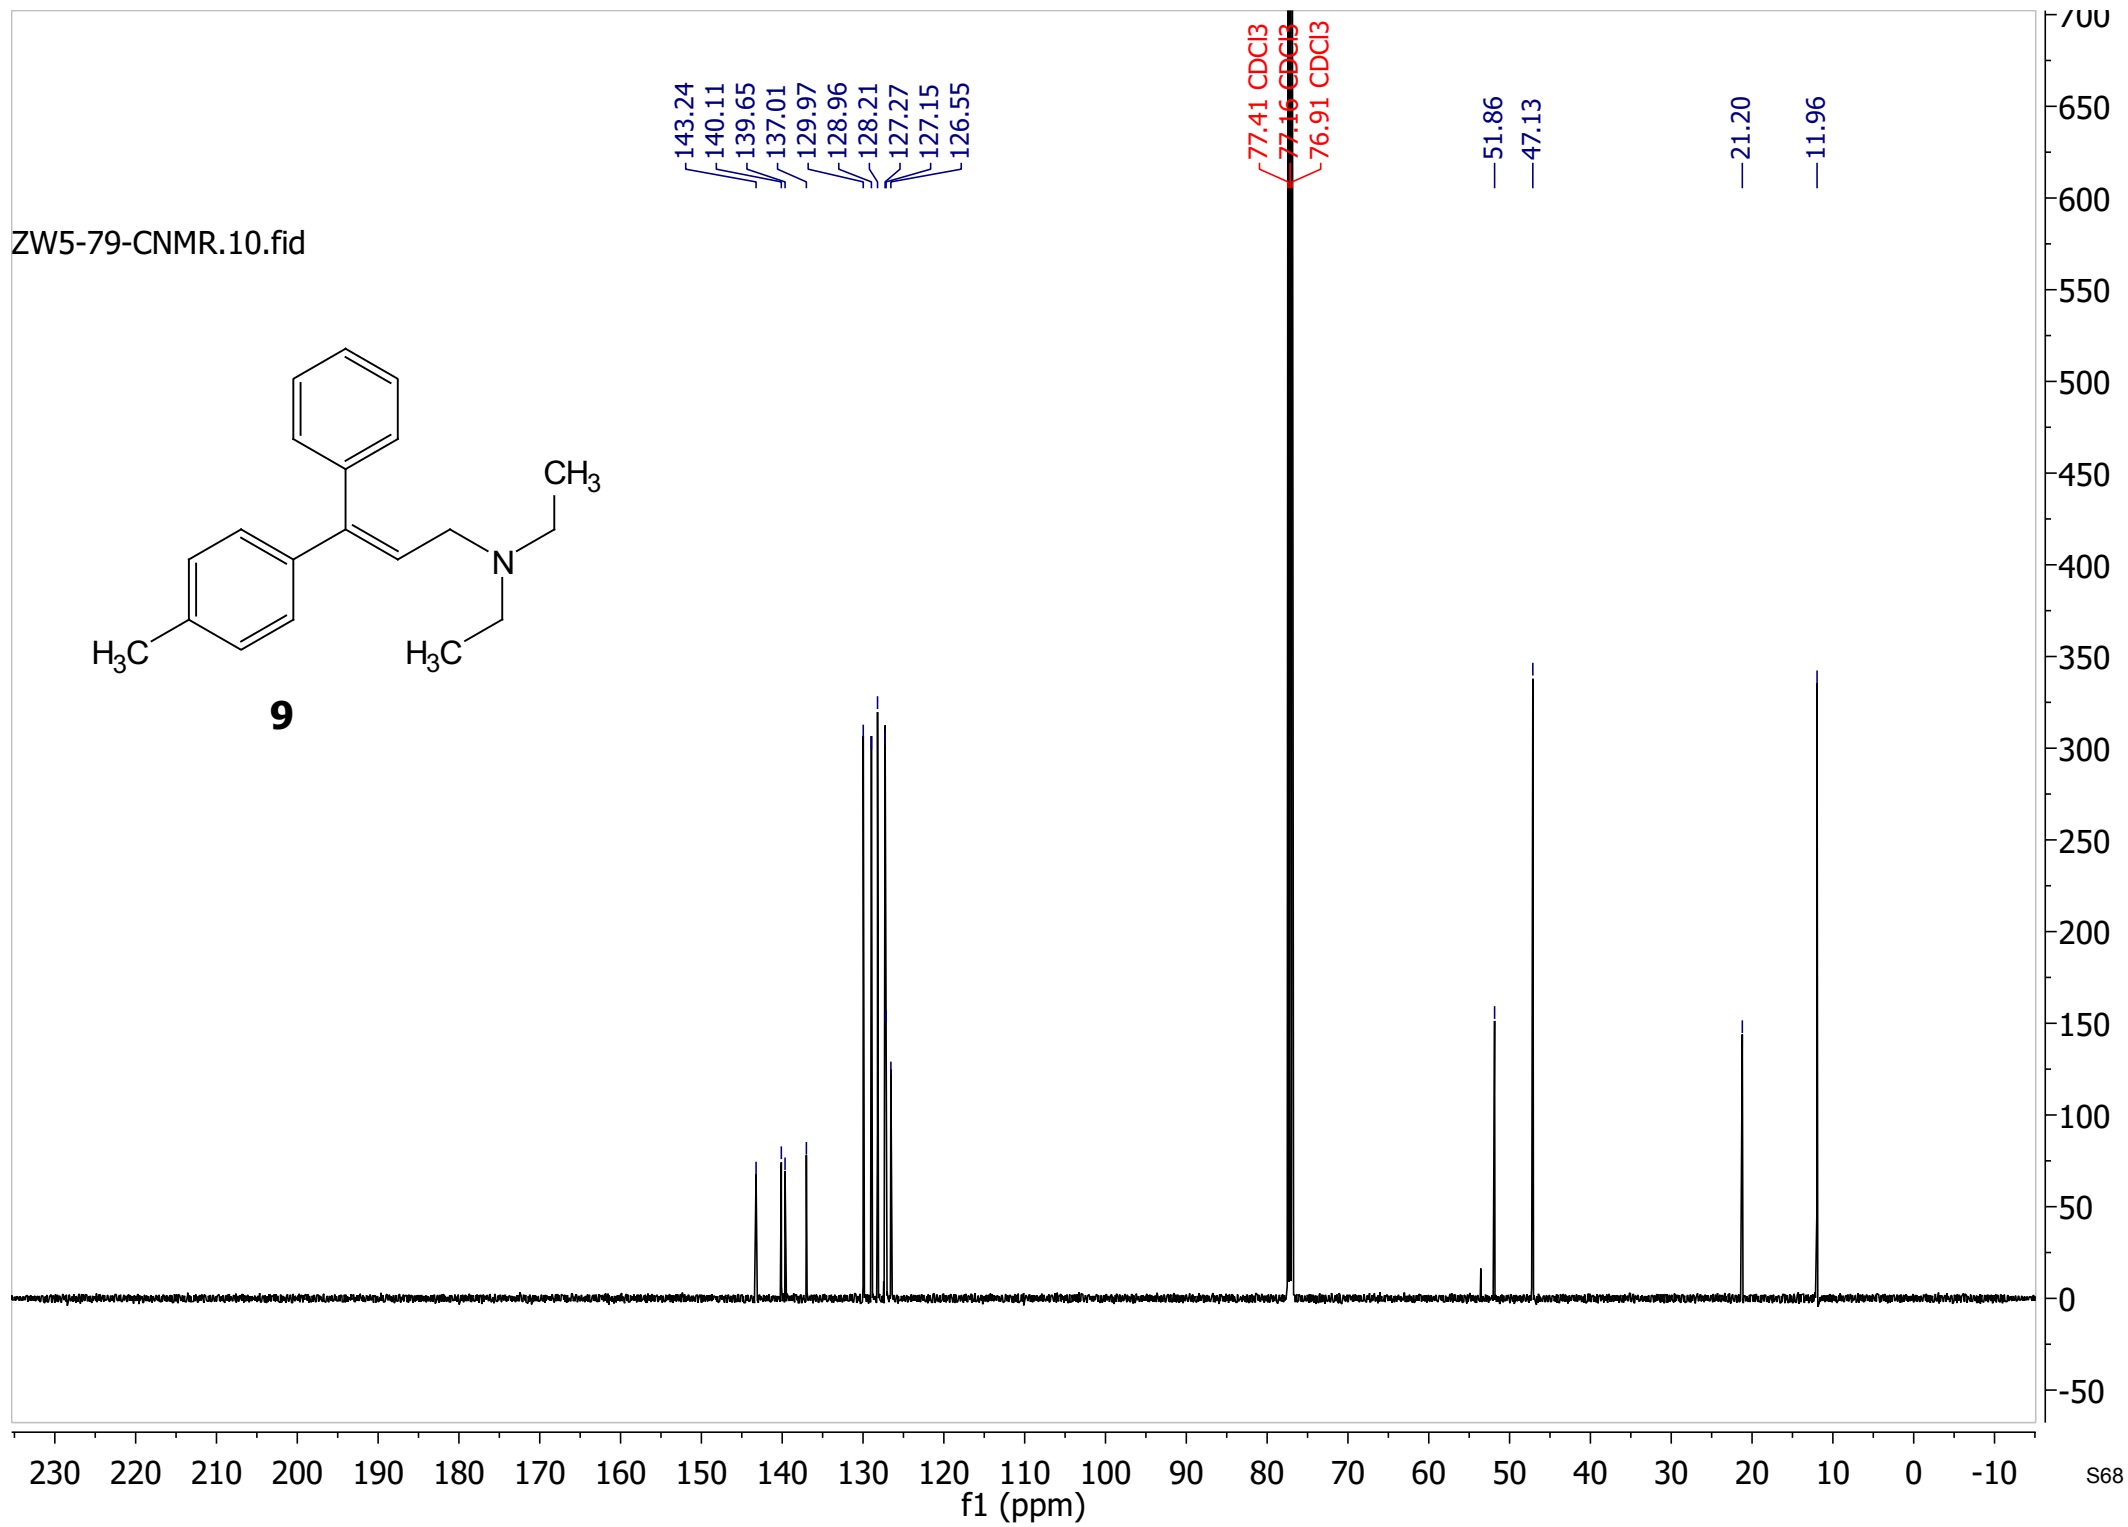

SDL-III-29-p.1H.10.fid

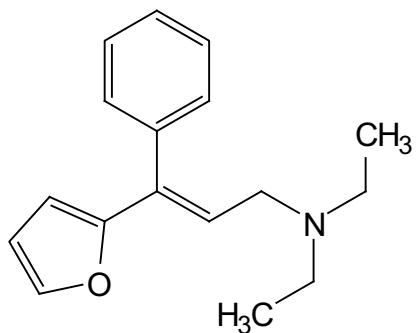

**10**

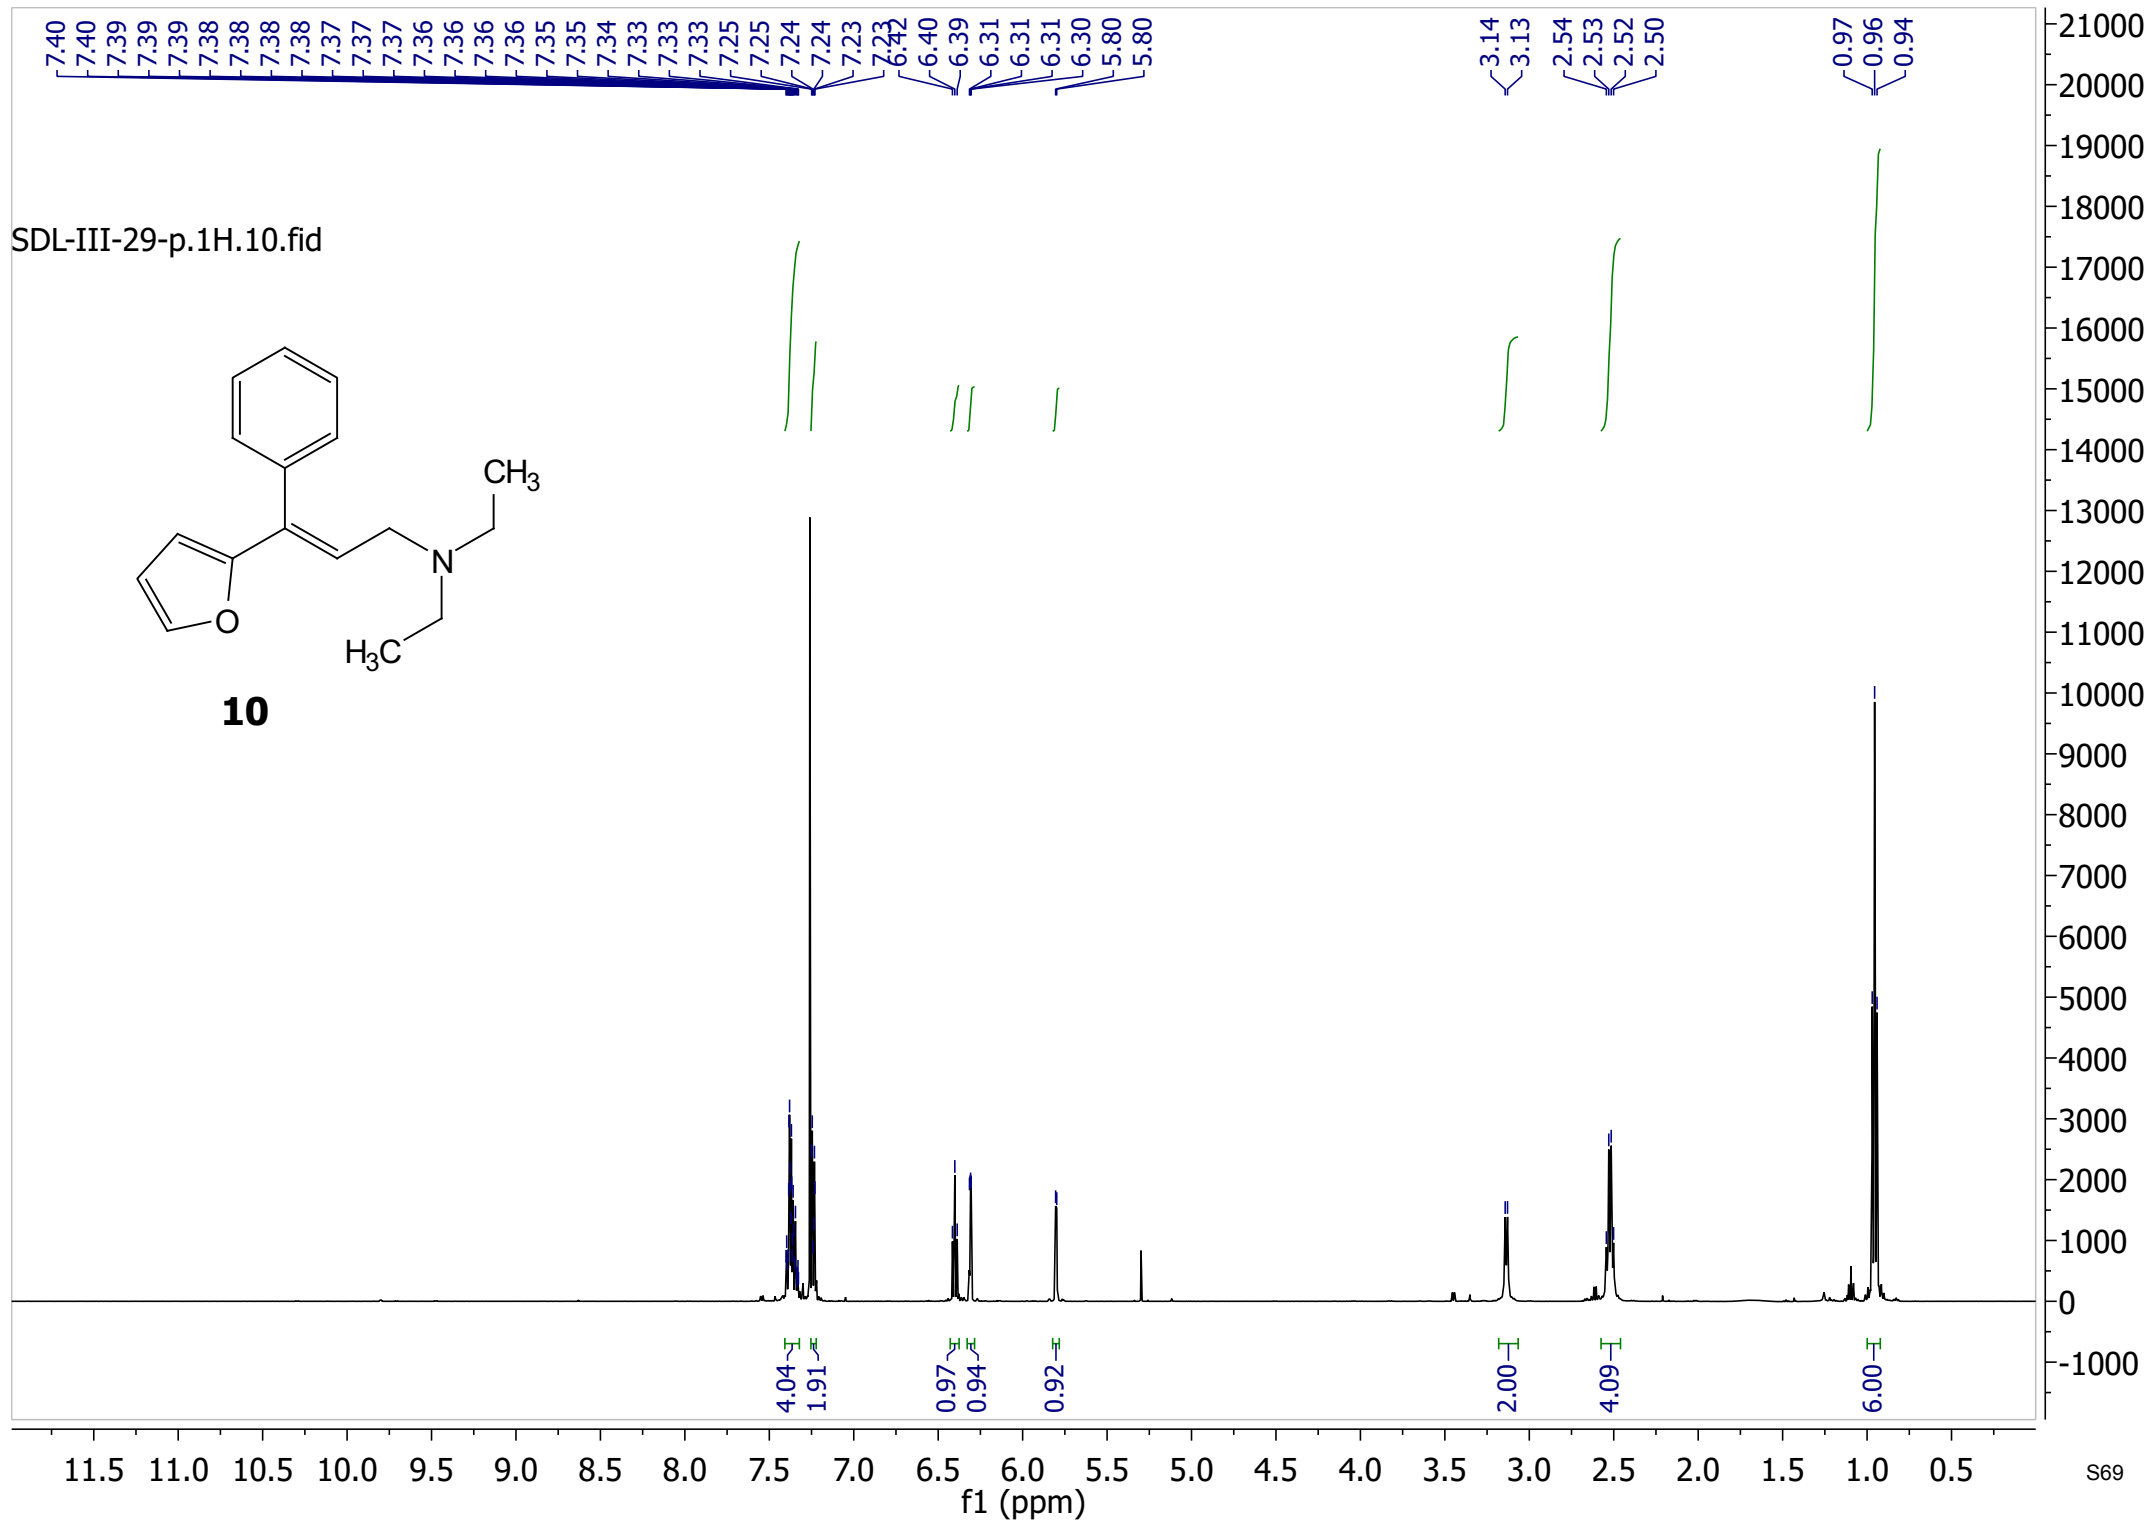

SDL-III-29-run2.13C.10.fid

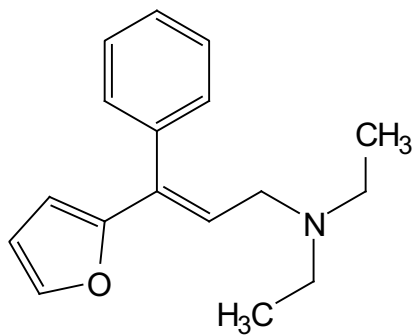

**10**

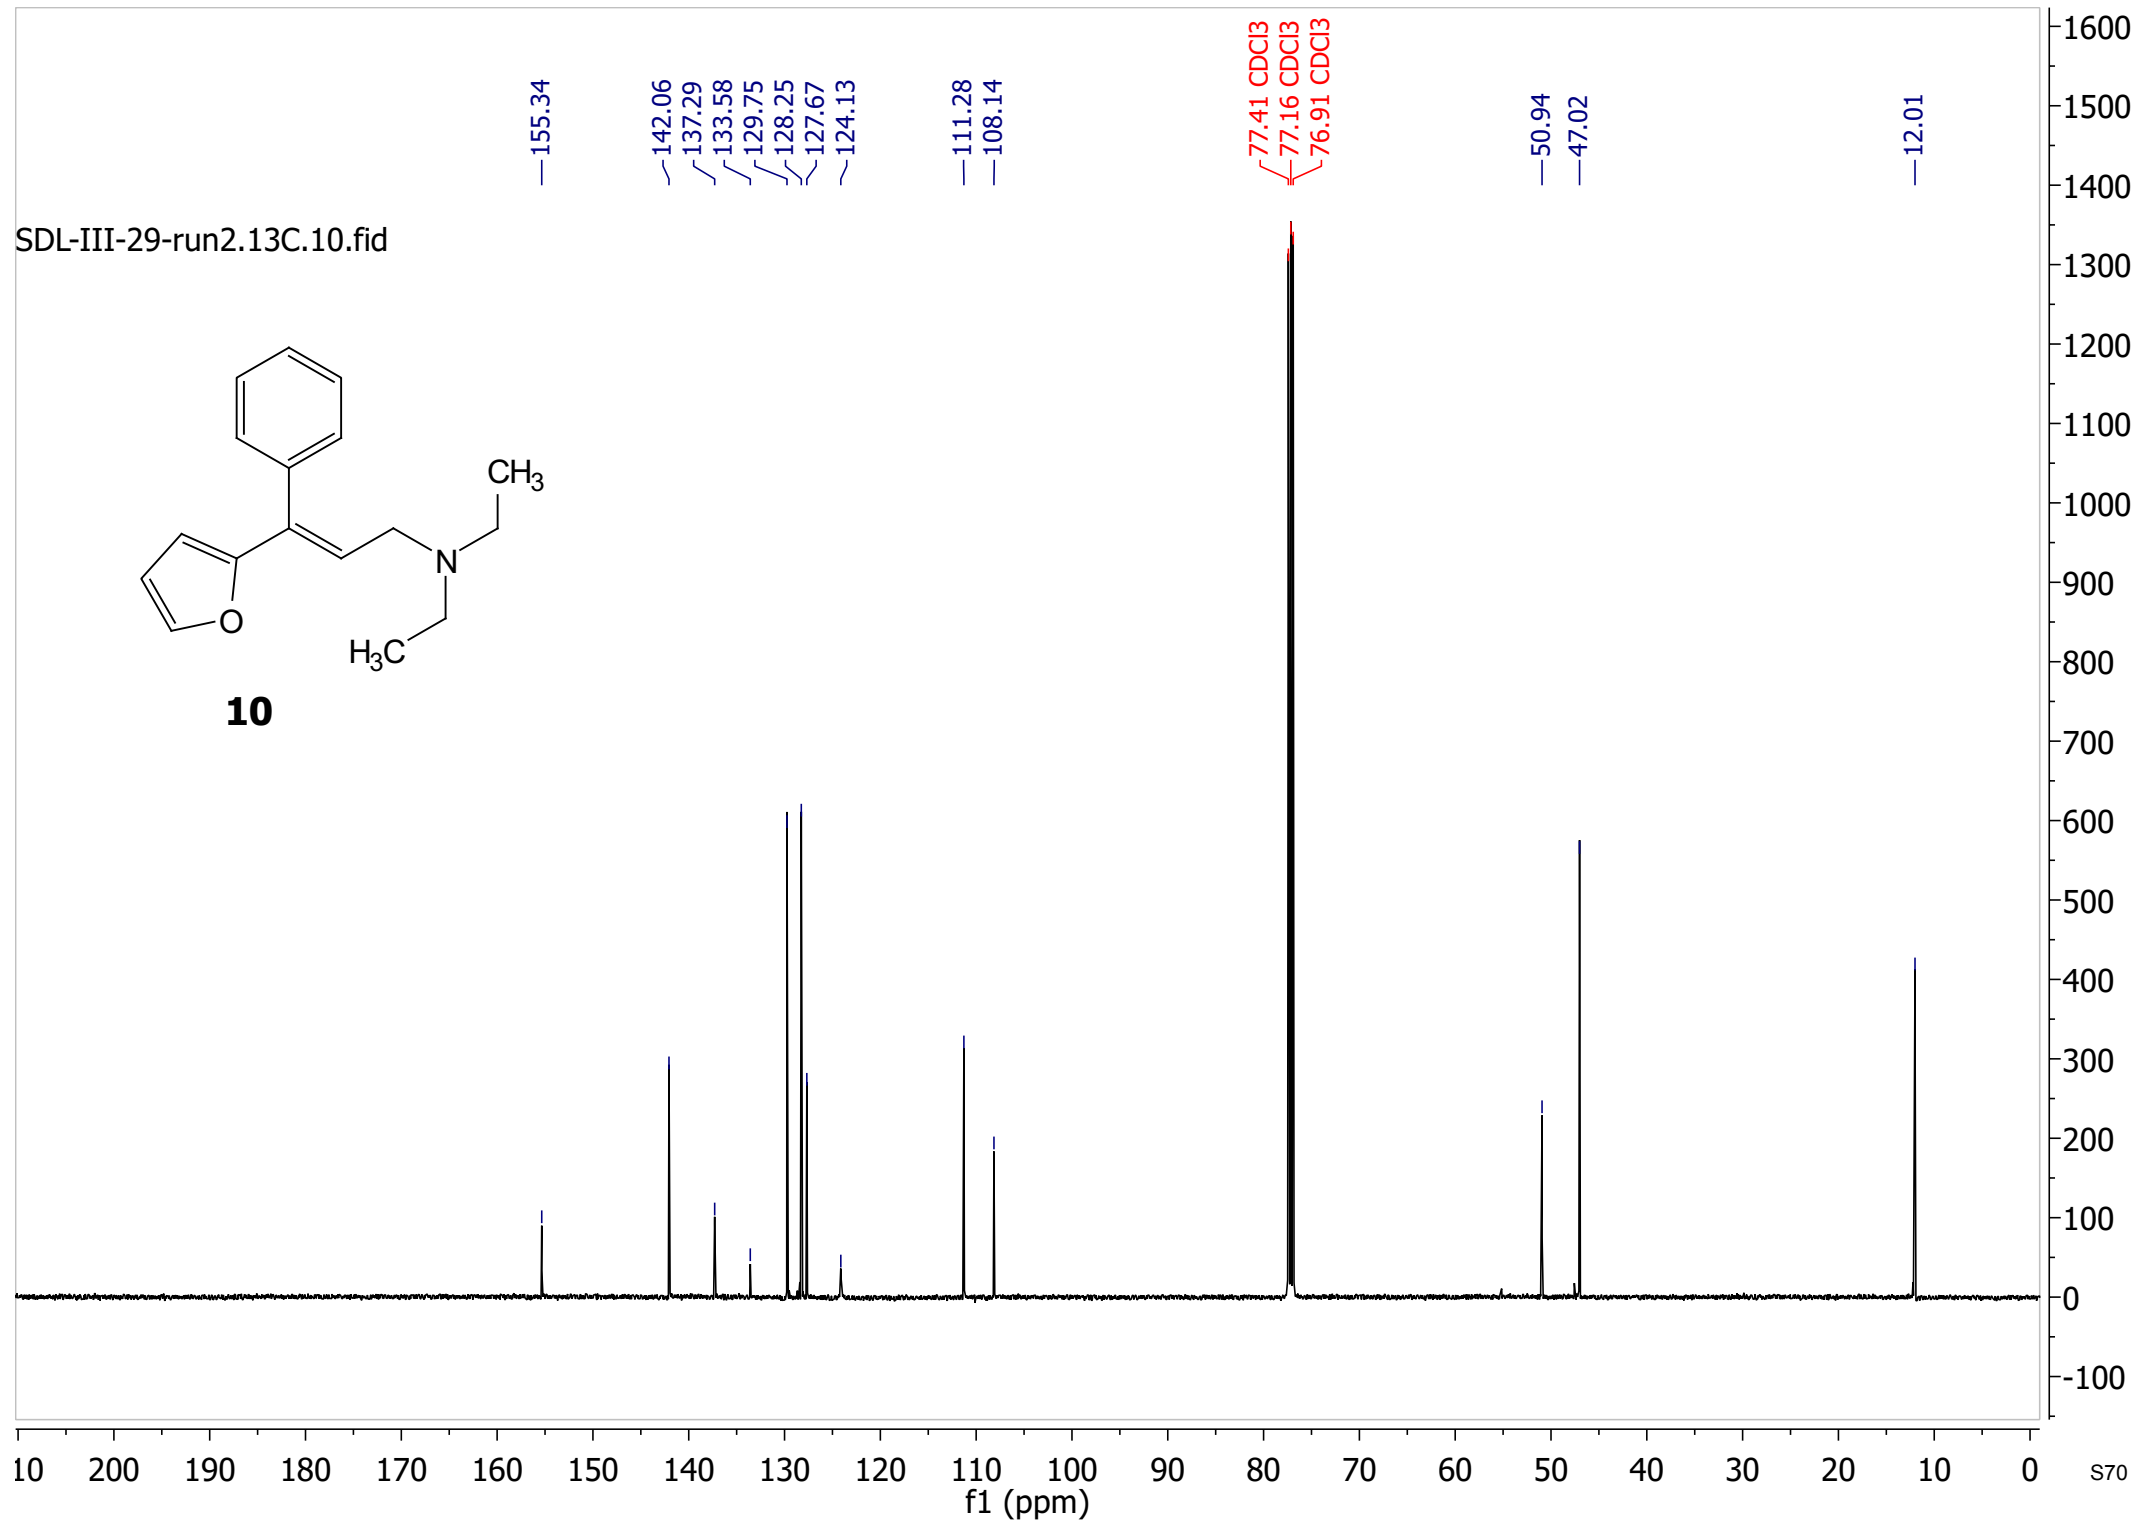

SDL-III-12-p.1H.10.fid

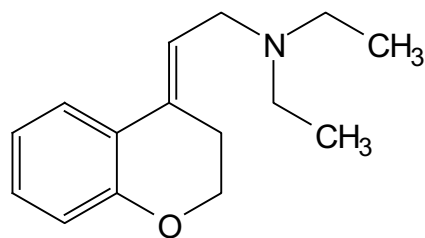

**11**

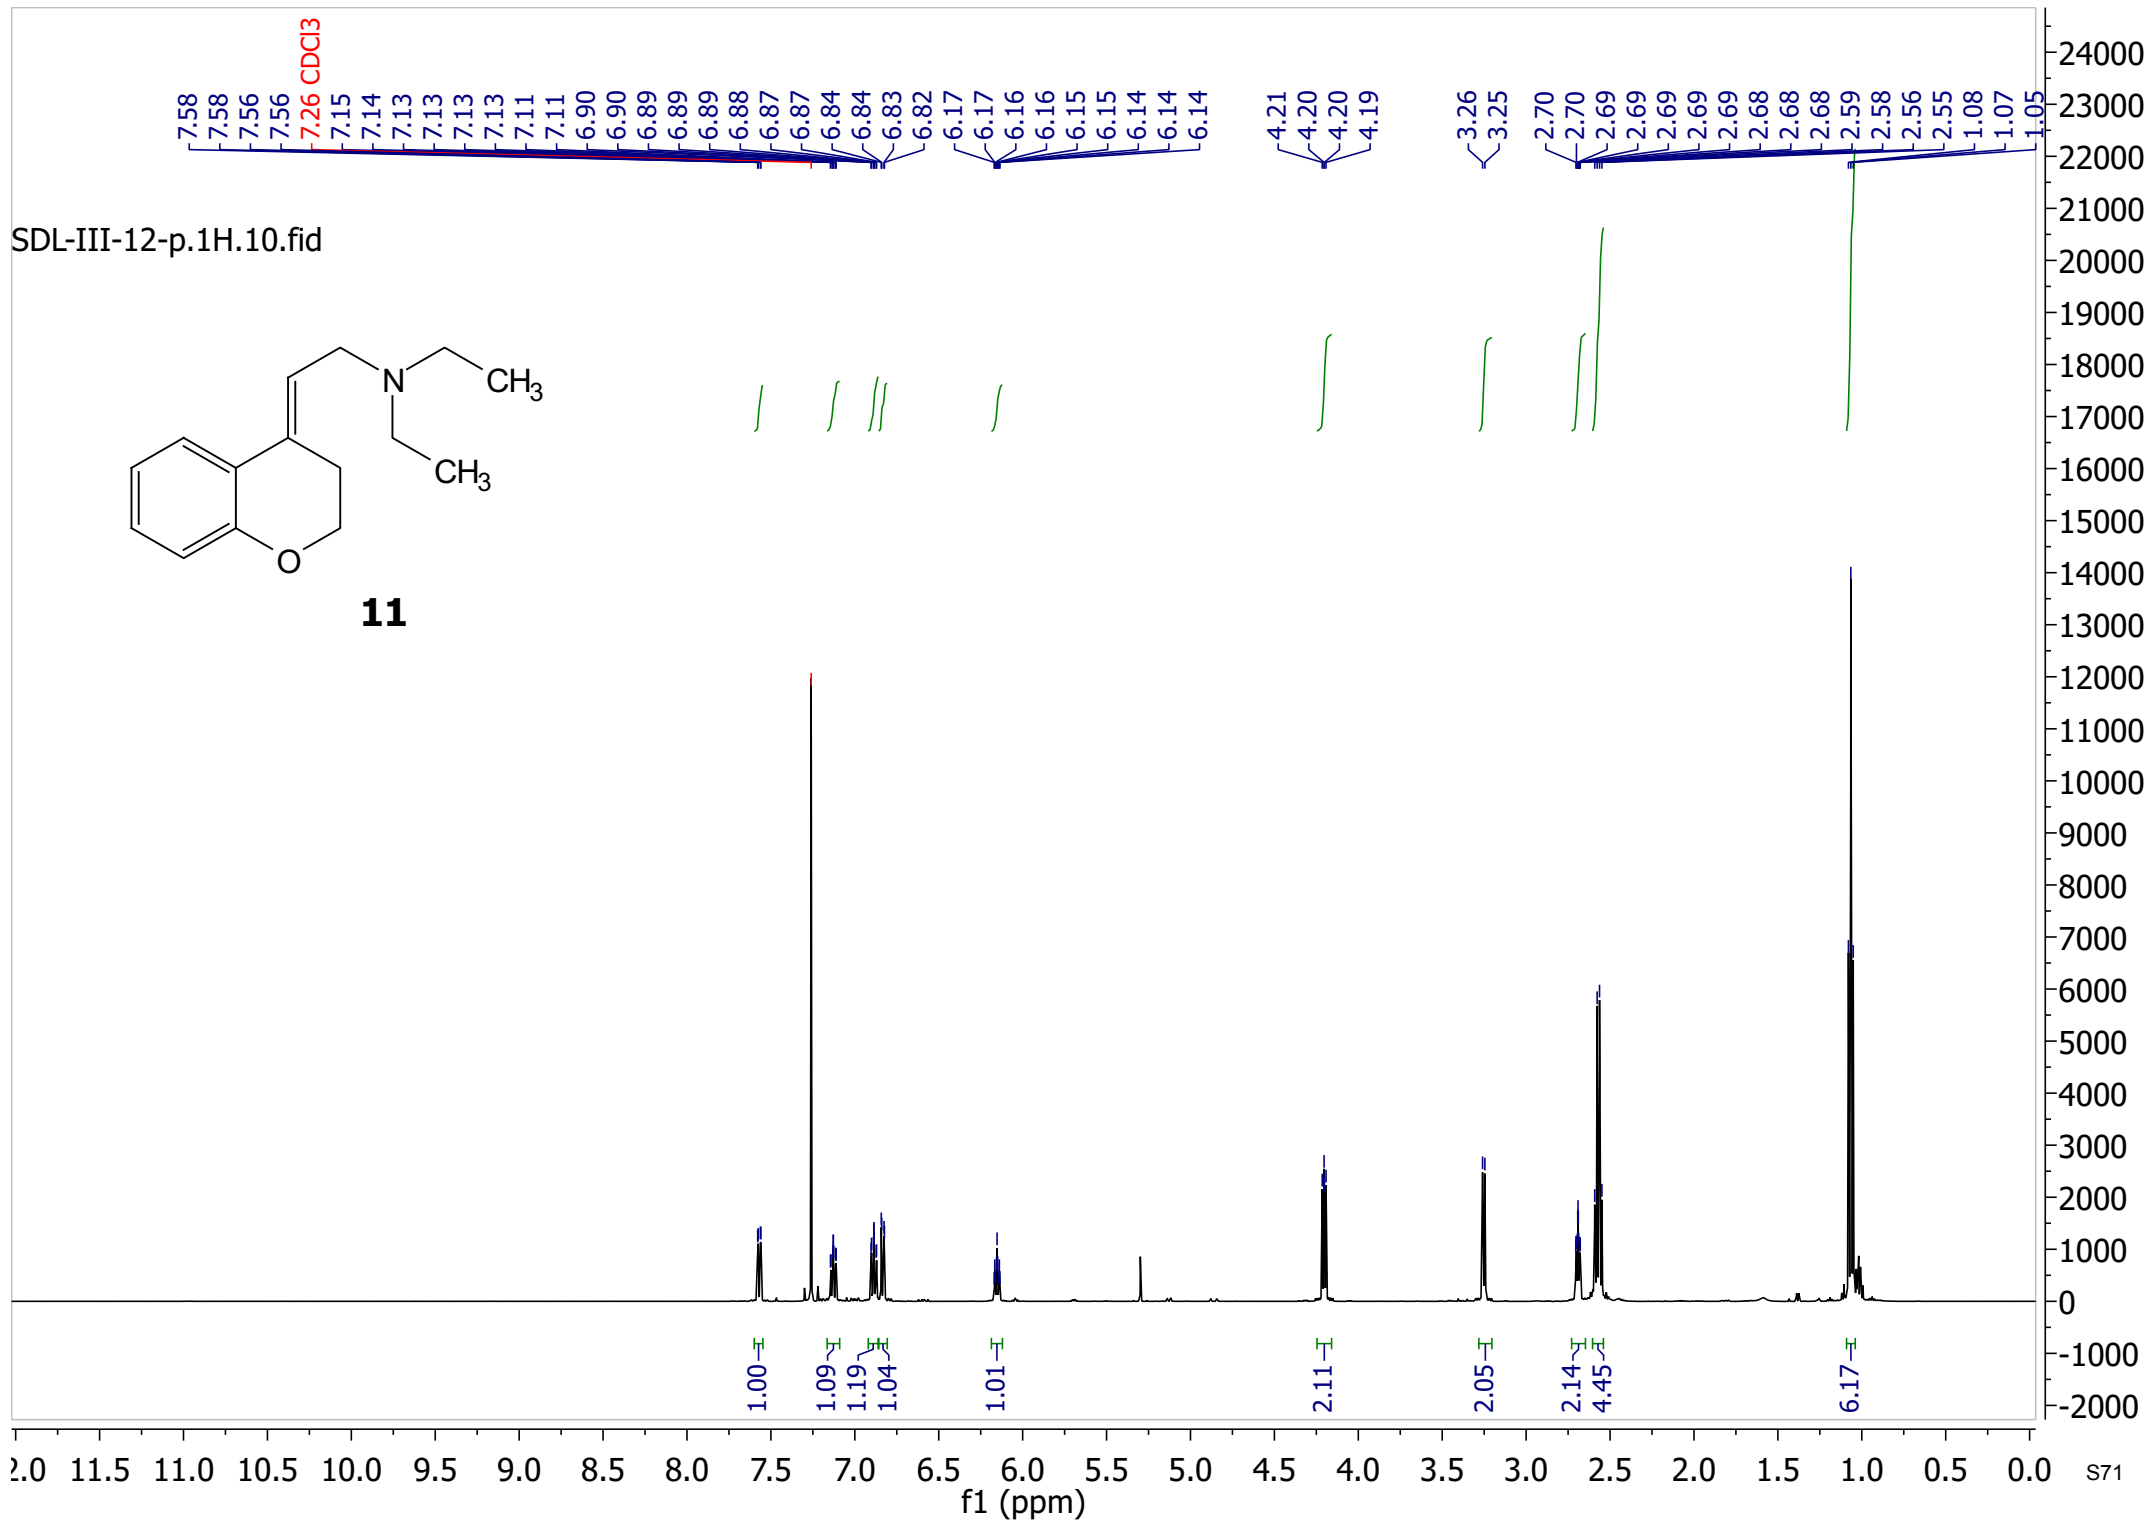

SDL-III-12-p.13C.10.fid

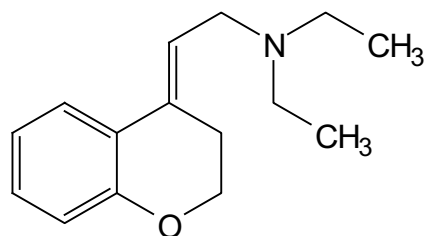

**11**

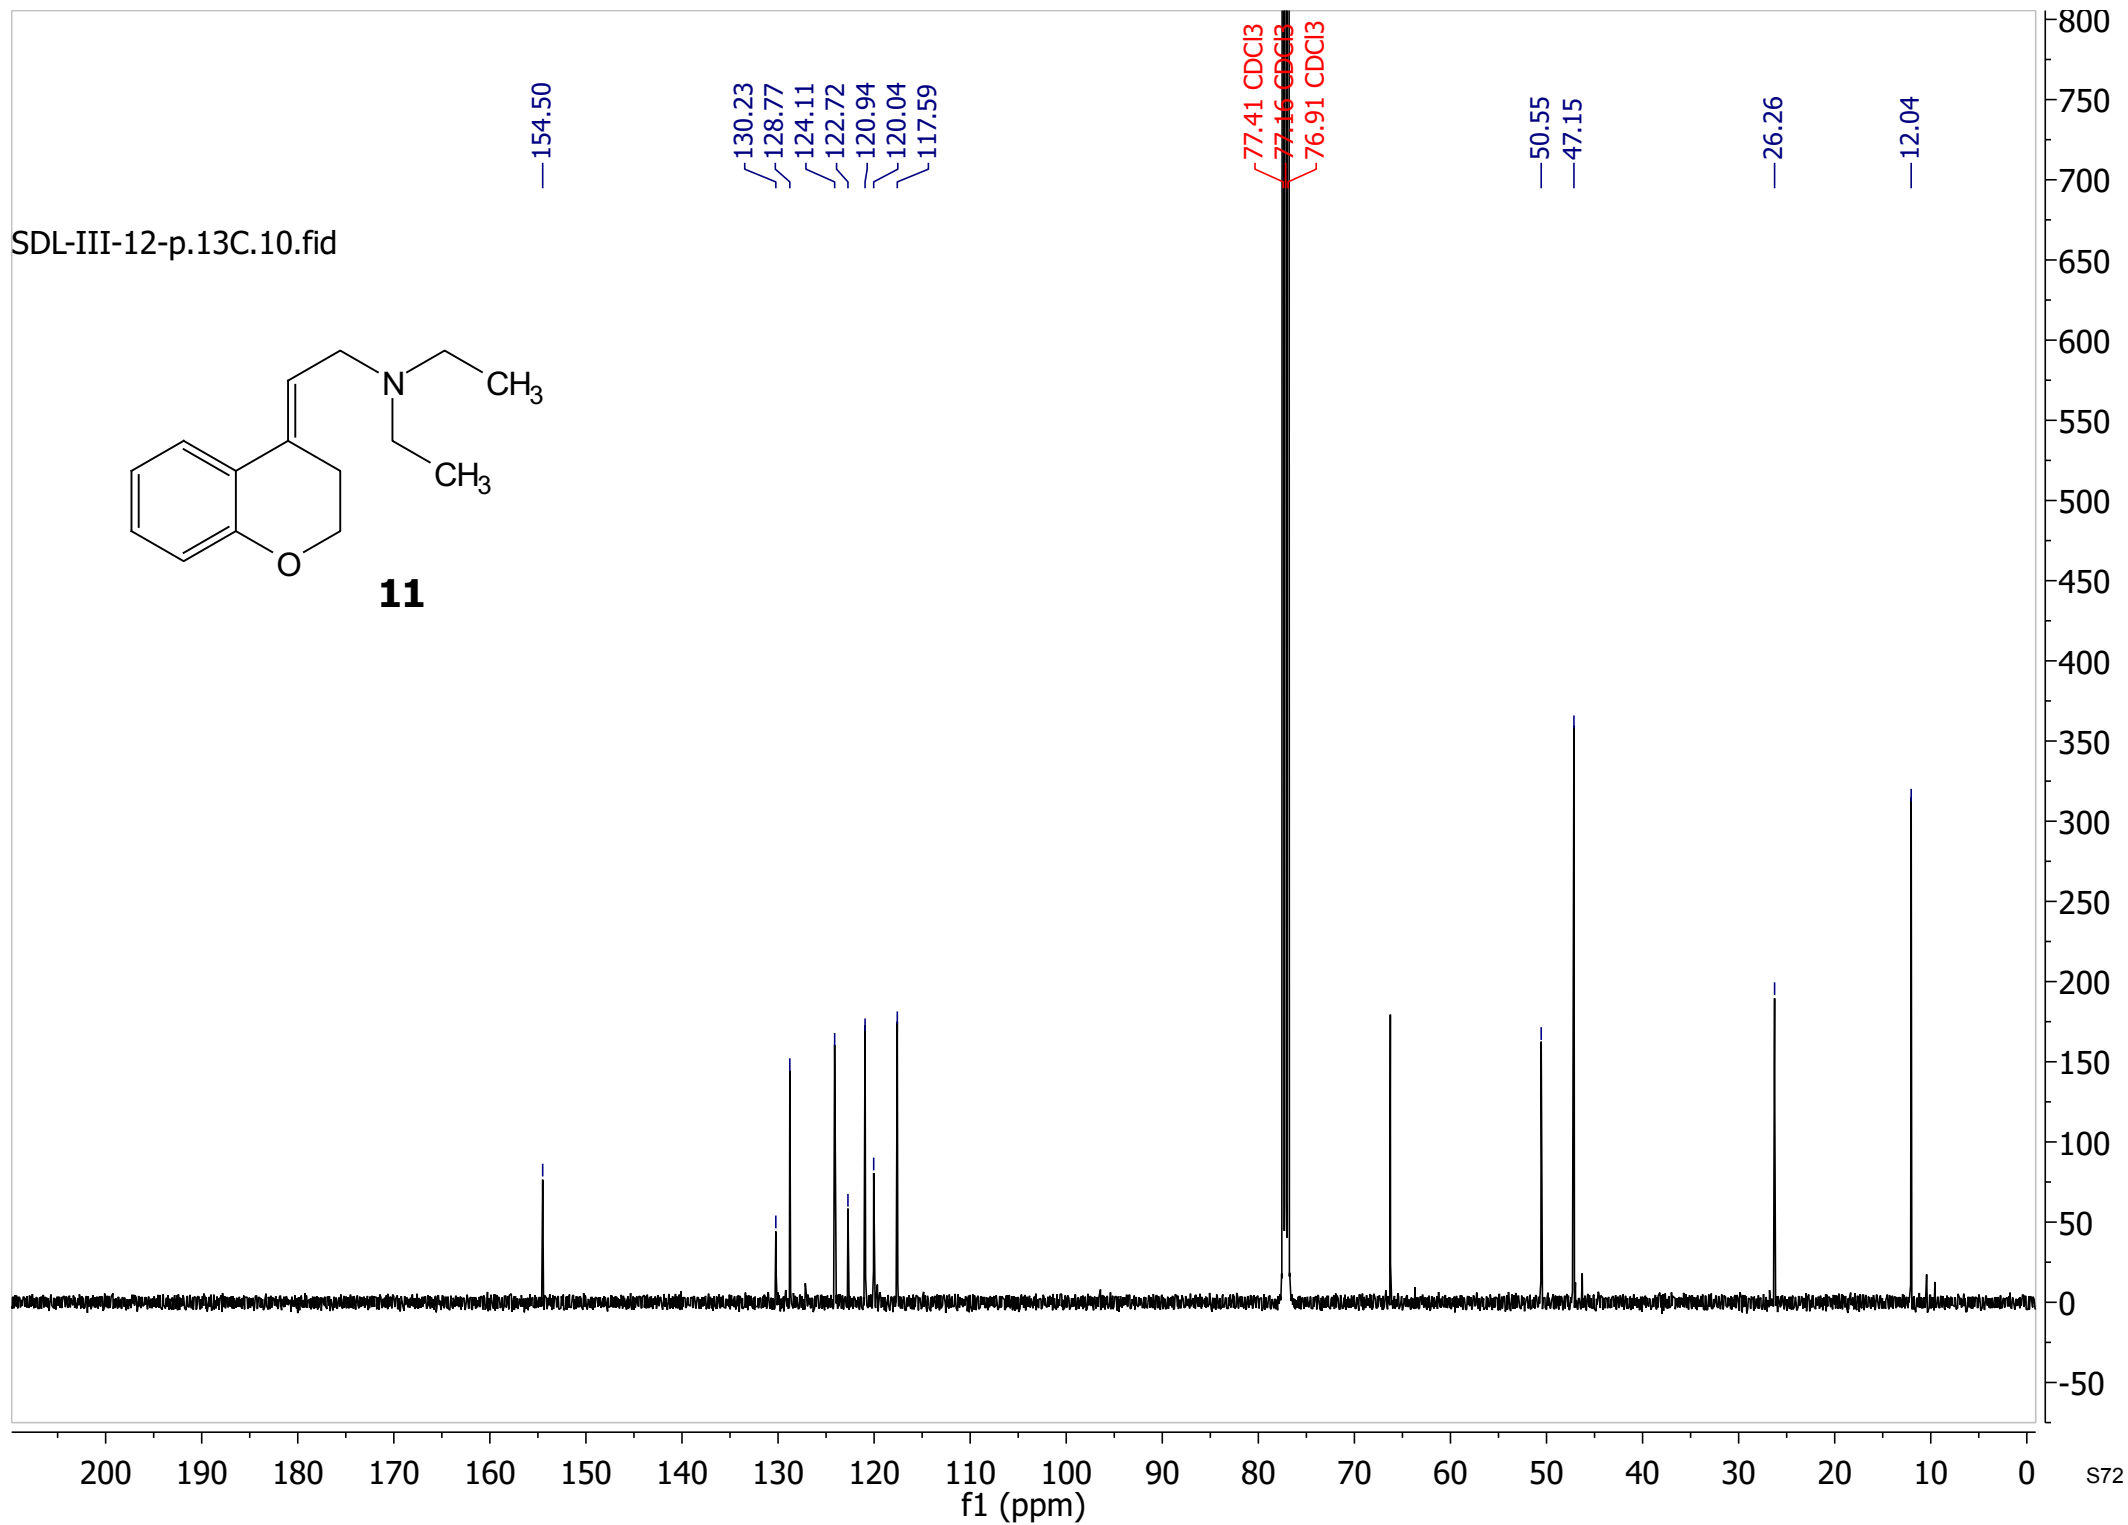



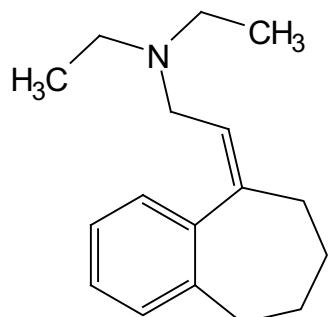

**12**

<sup>1</sup>H NMR, 500 MHz, CDCl<sub>3</sub>

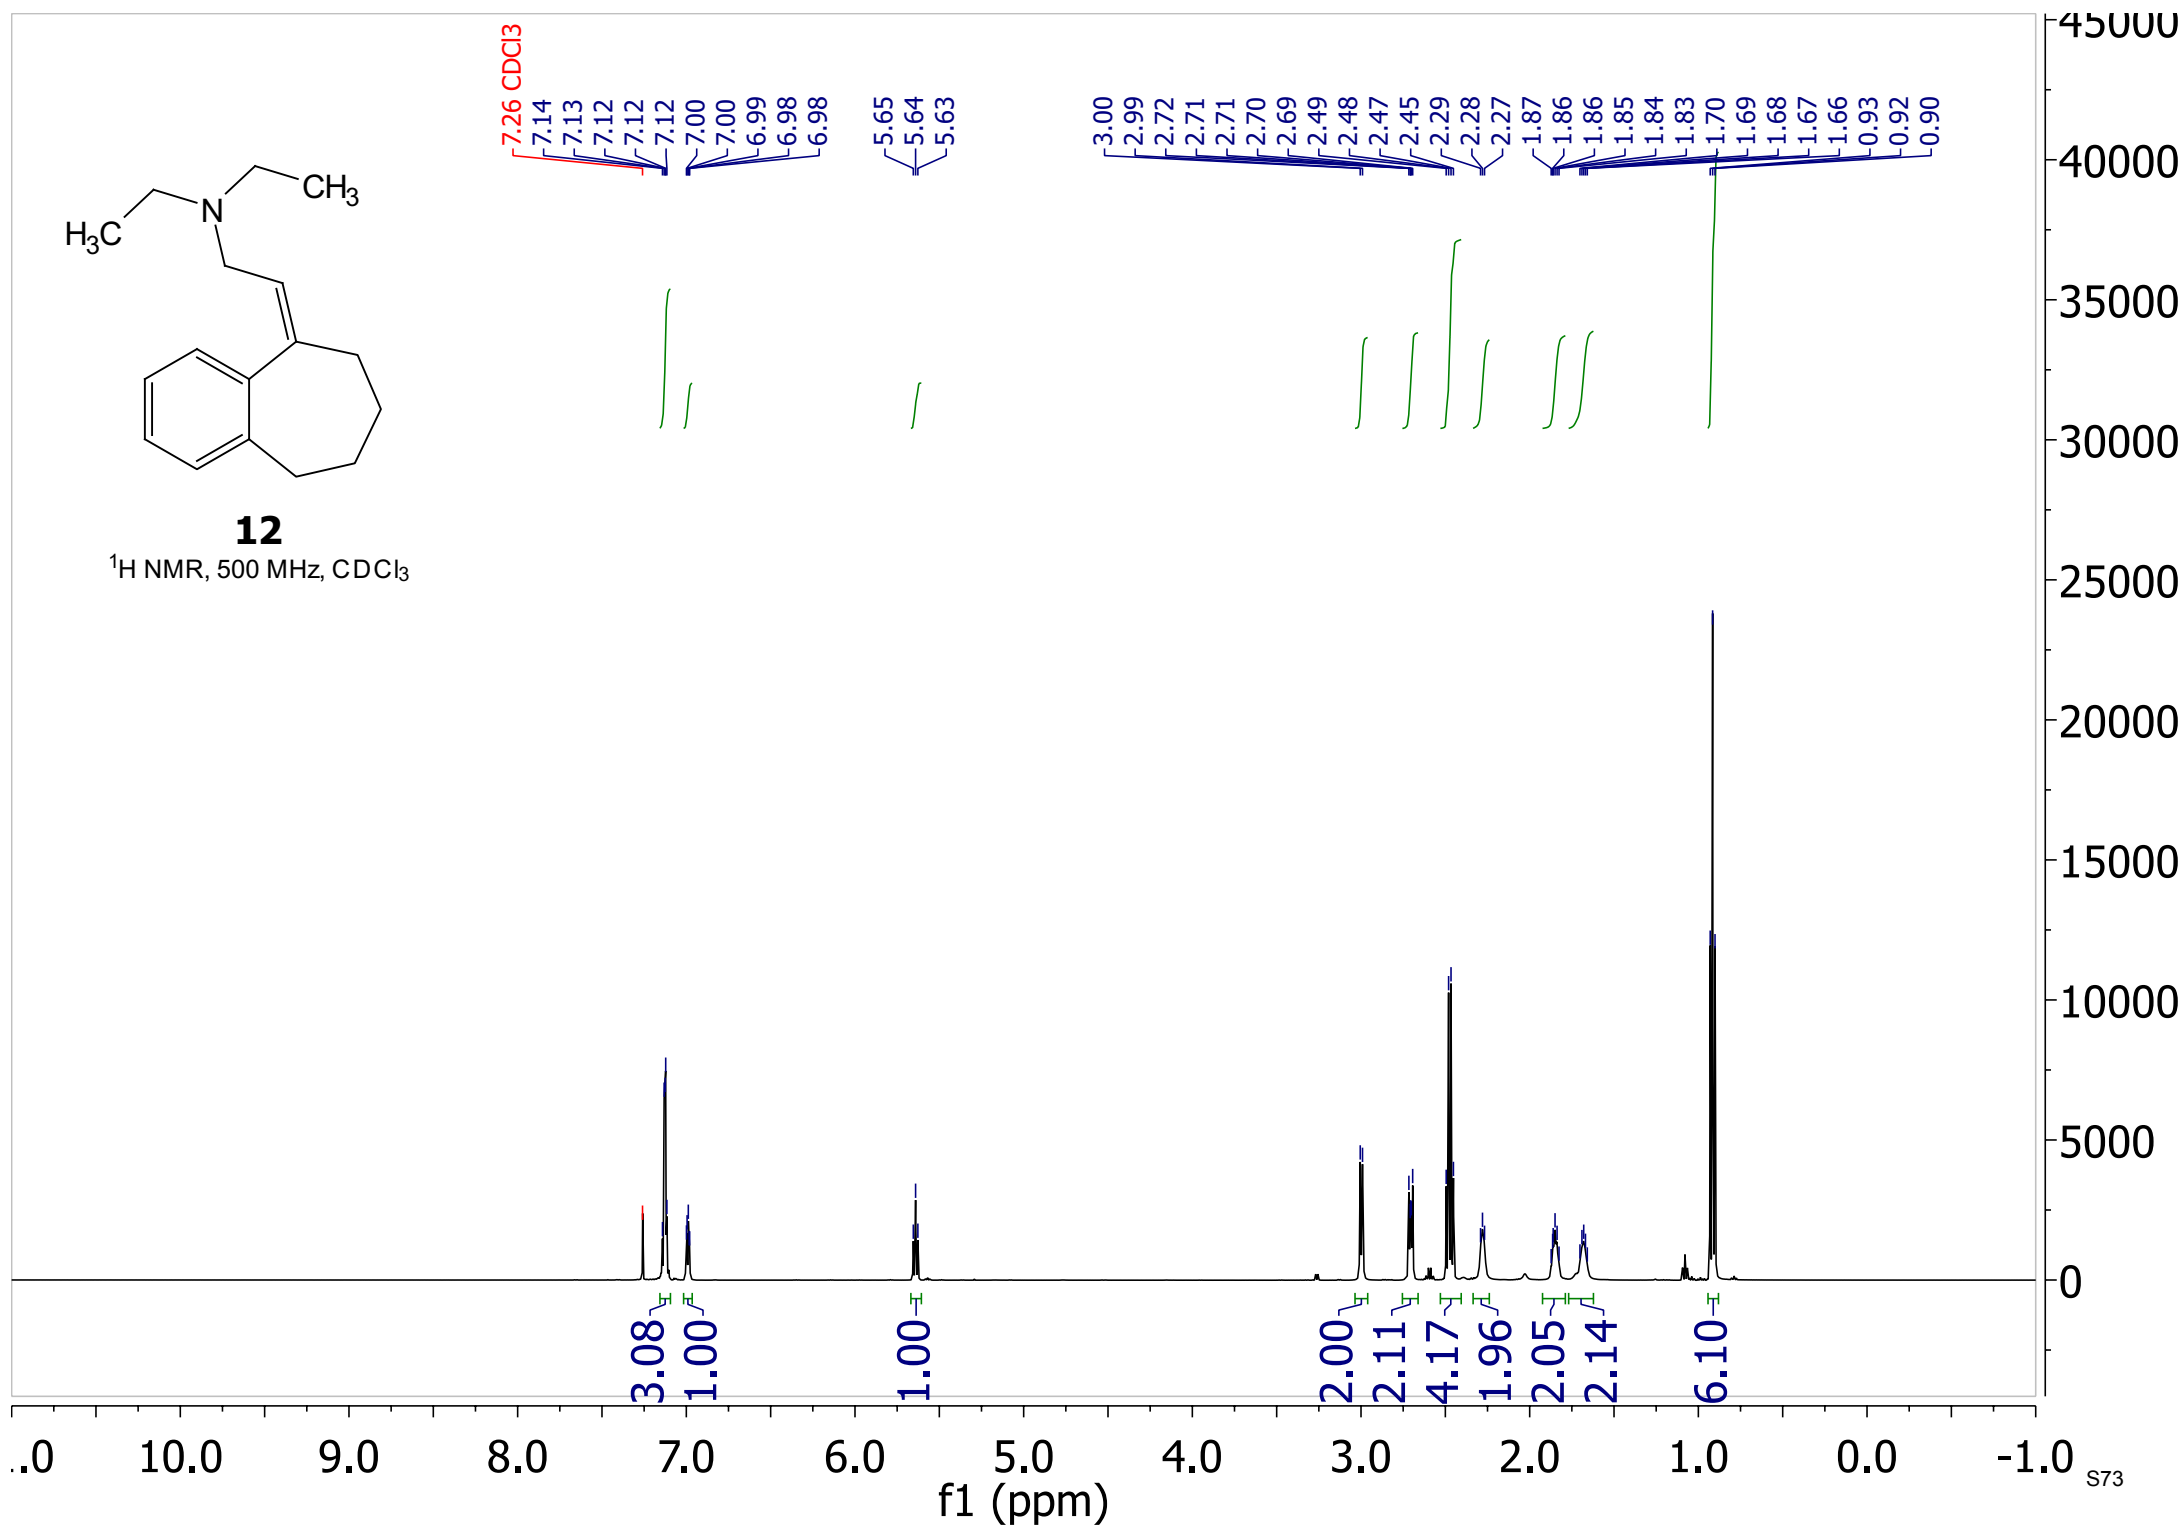

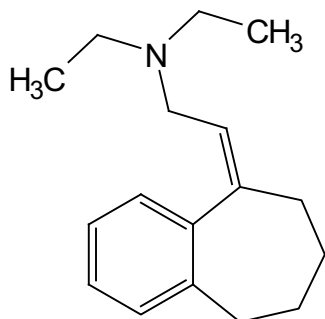

**12**

<sup>13</sup>C NMR, 125 MHz, CDCl<sub>3</sub>

145.62  
141.73  
141.18  
129.12  
128.98  
126.92  
125.59  
124.99

77.41 CDCl<sub>3</sub>  
77.16 CDCl<sub>3</sub>  
76.91 CDCl<sub>3</sub>

51.08  
46.81

38.10  
36.63  
33.30  
27.87

11.76

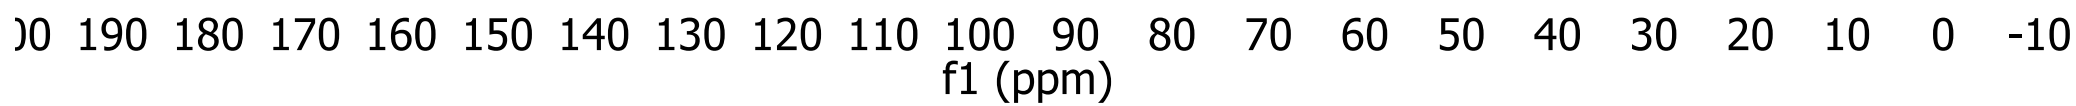

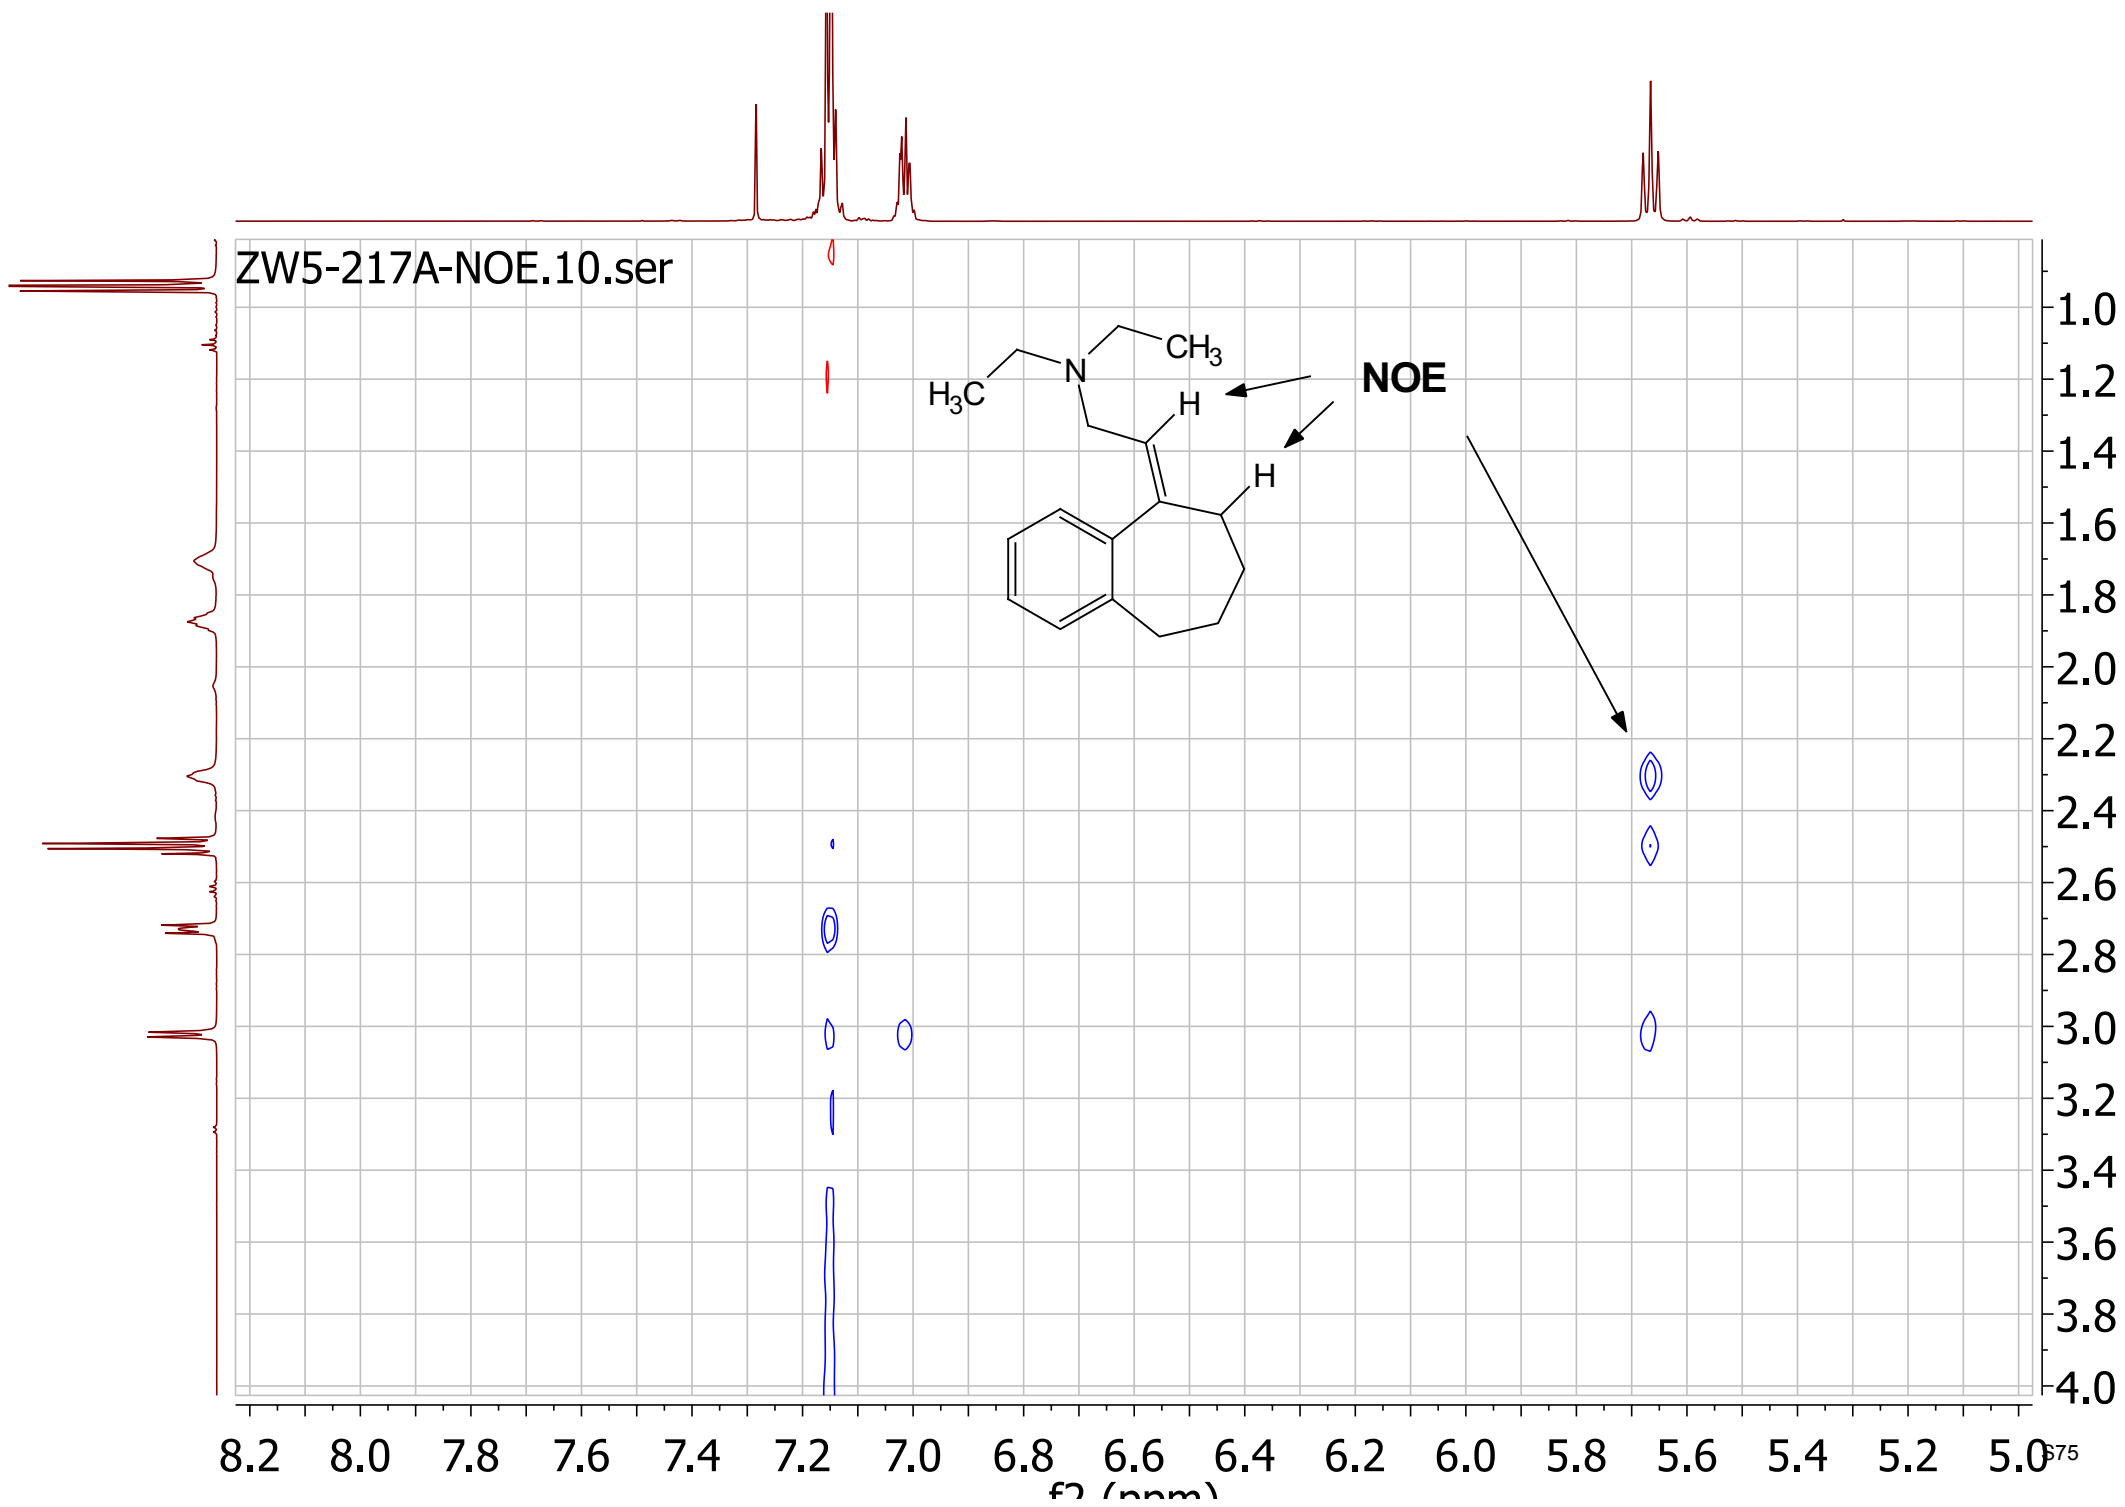

SDL-III-169-ppp.1H-rerun.10.fid

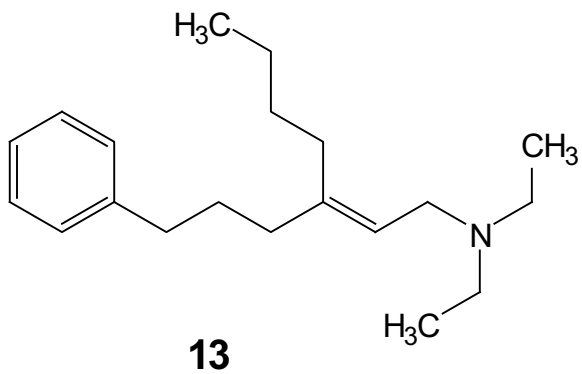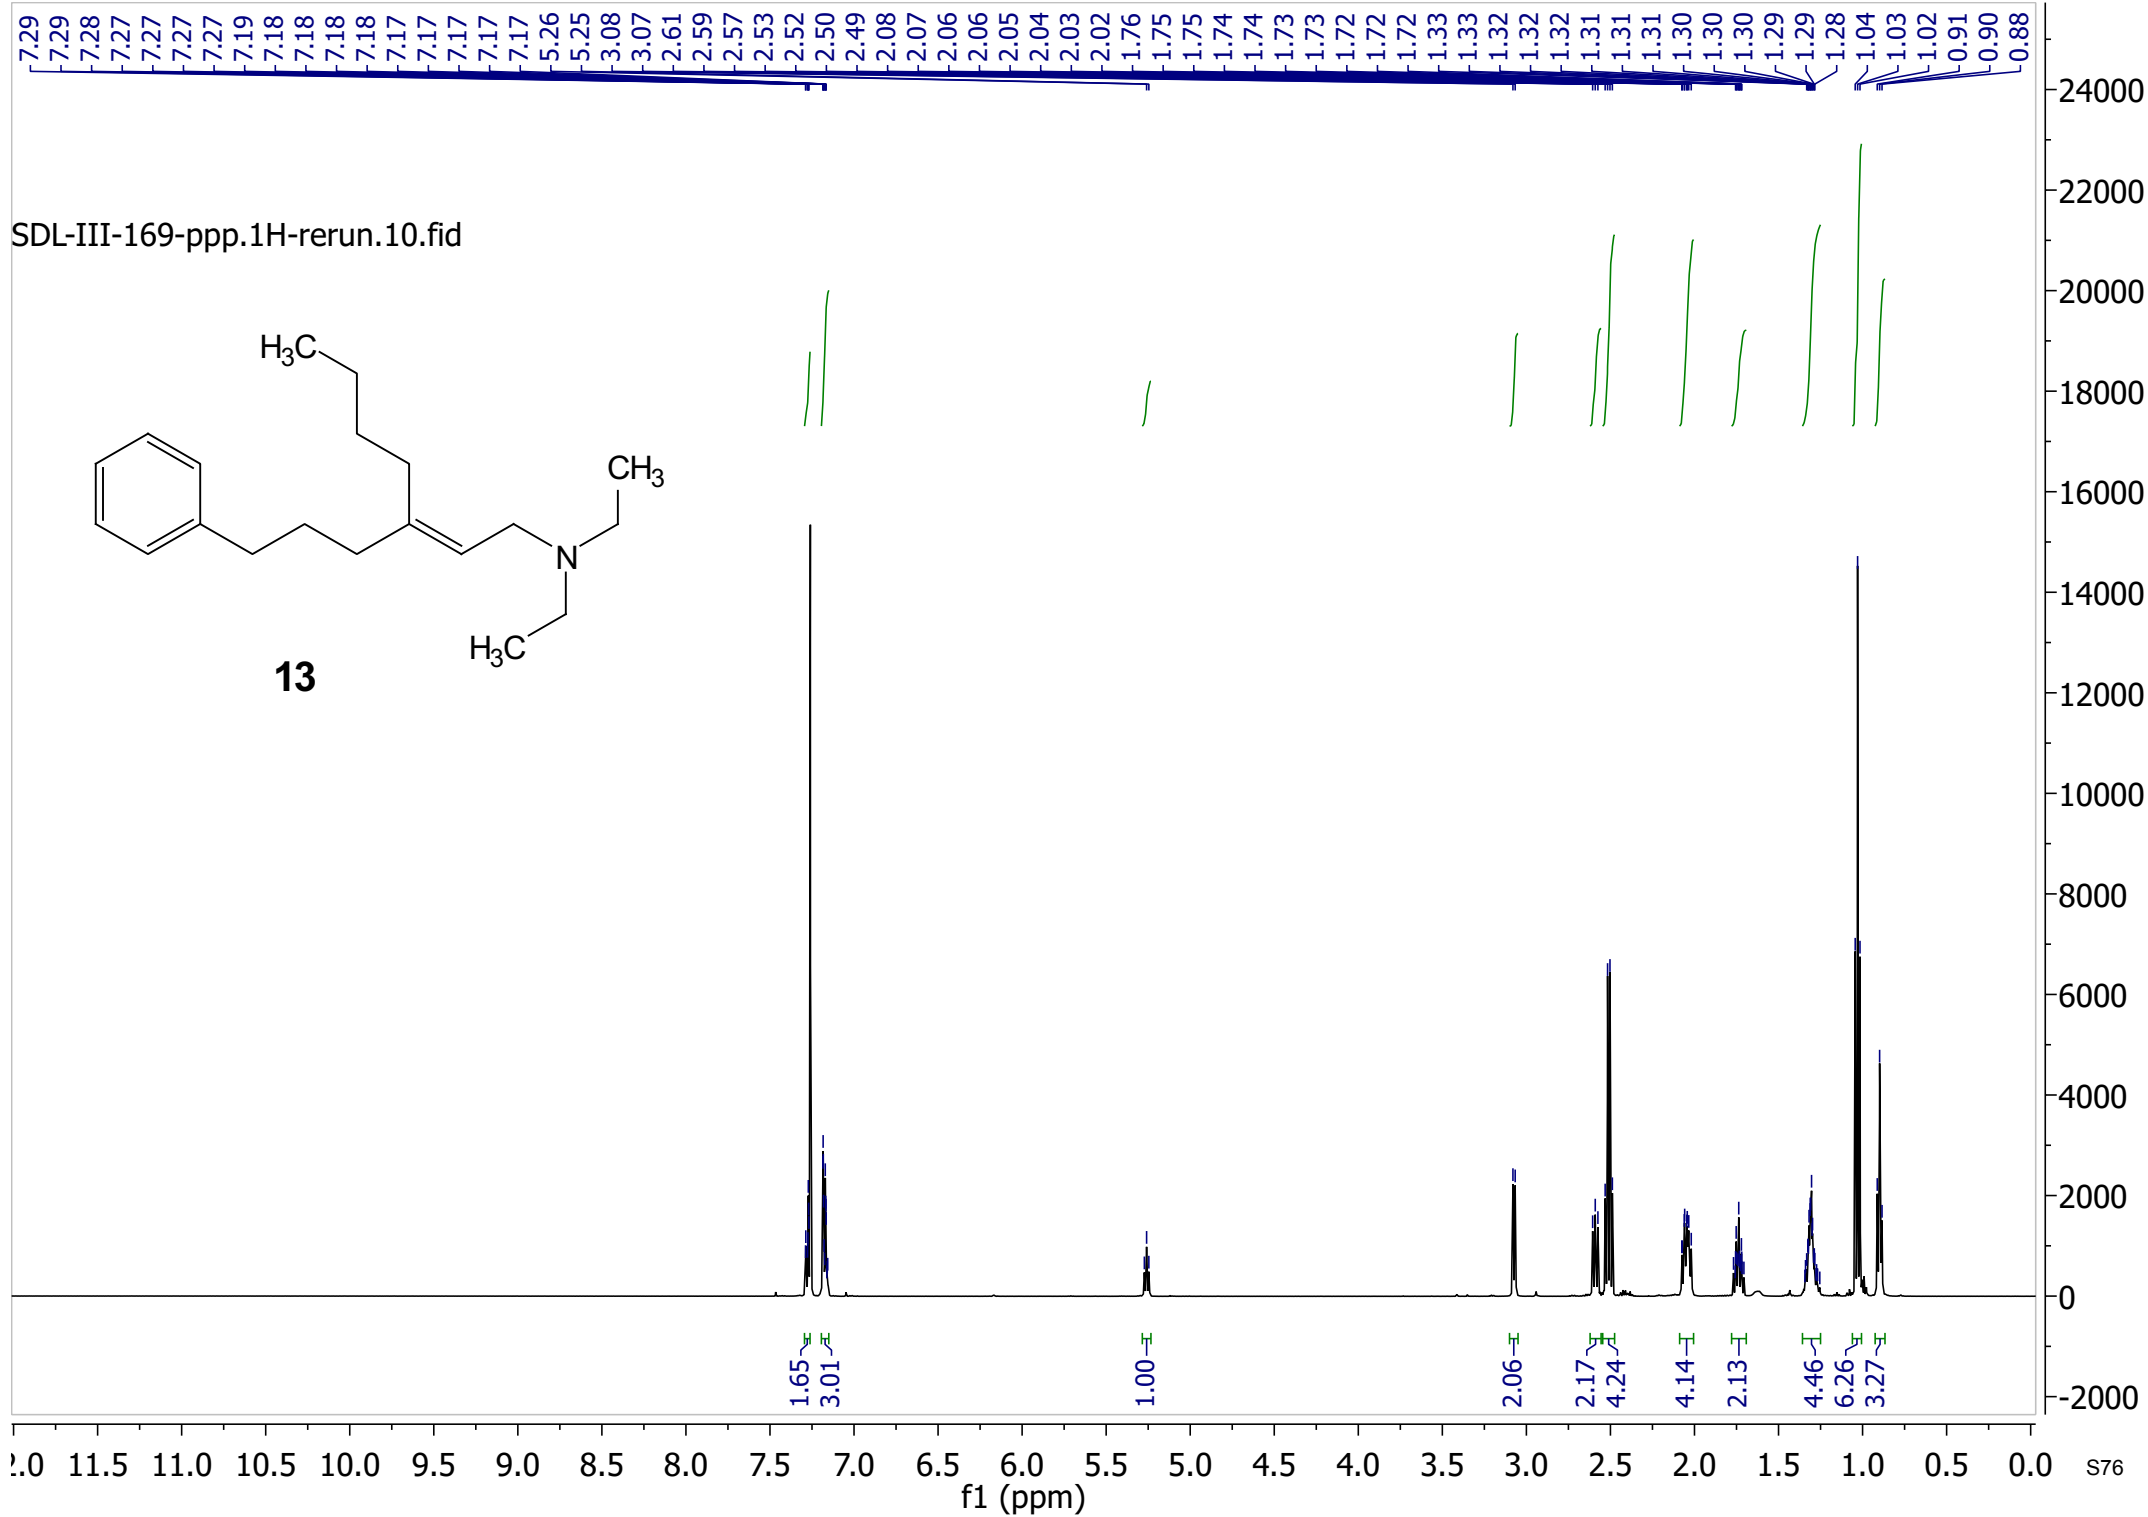

SDL-III-169-ppp.13C-rerun.10.fid

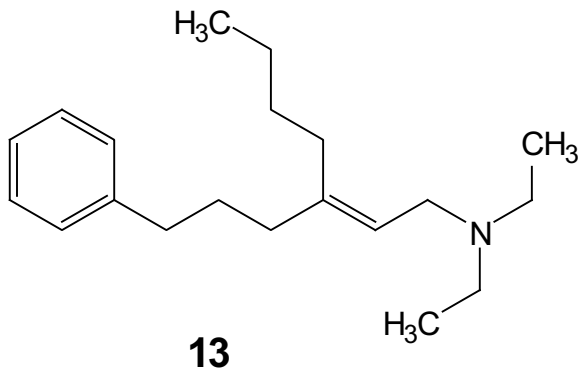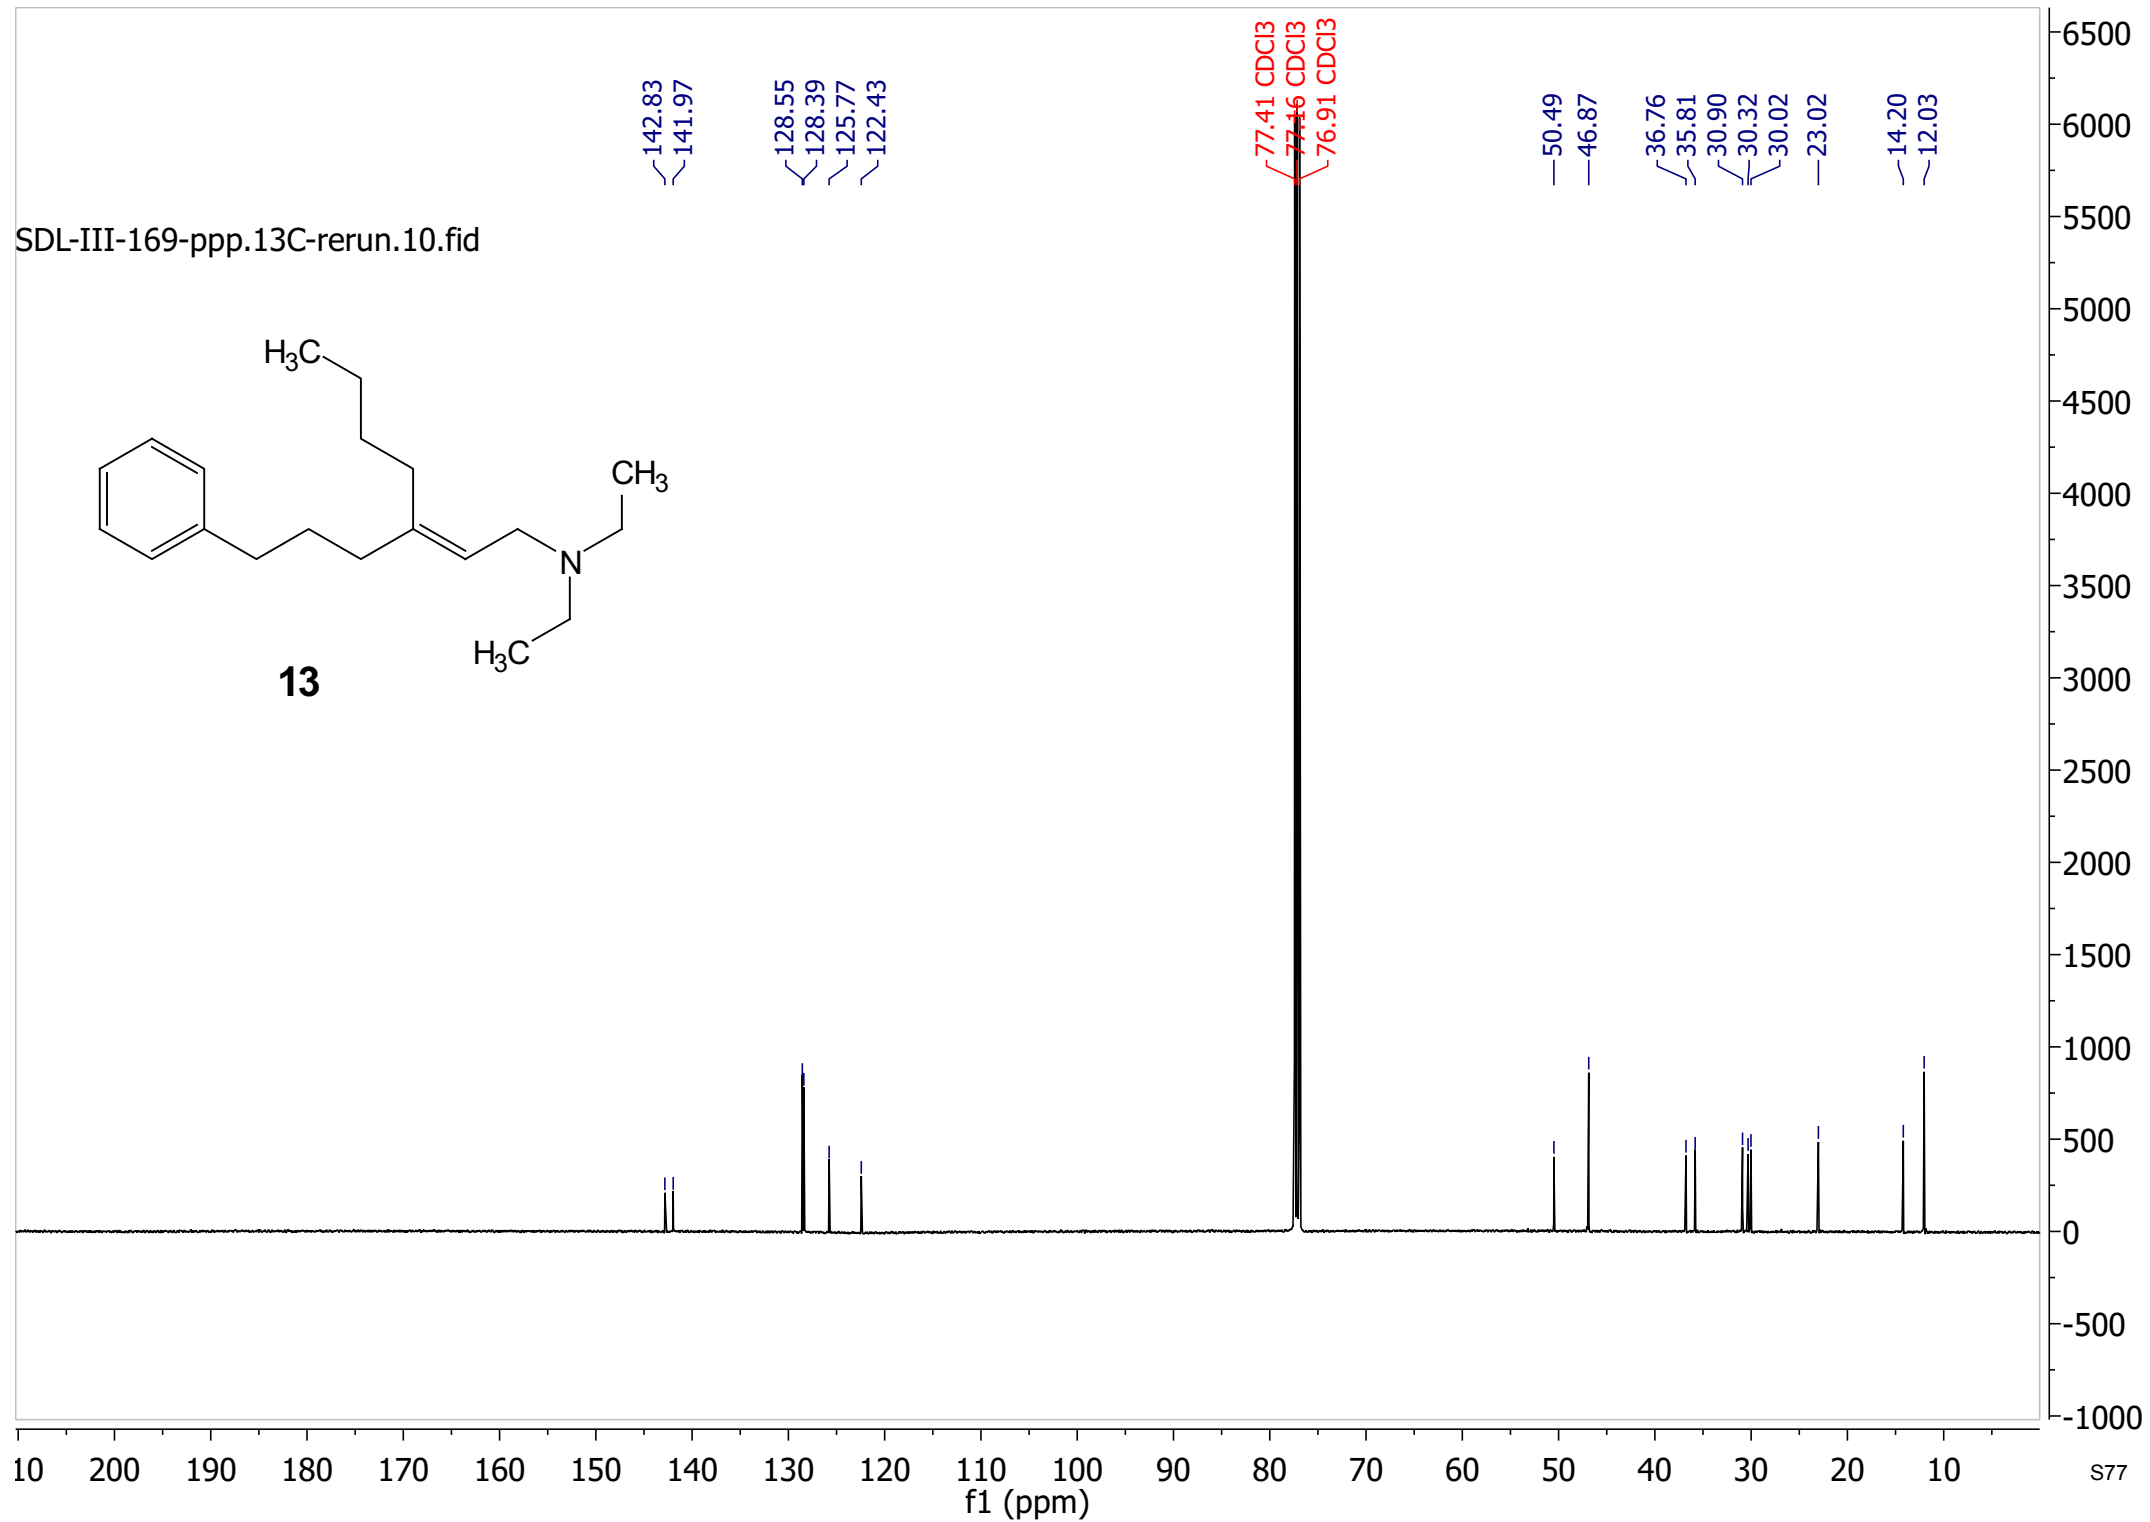

SDL-III-232-p.1H-rerun.10.fid

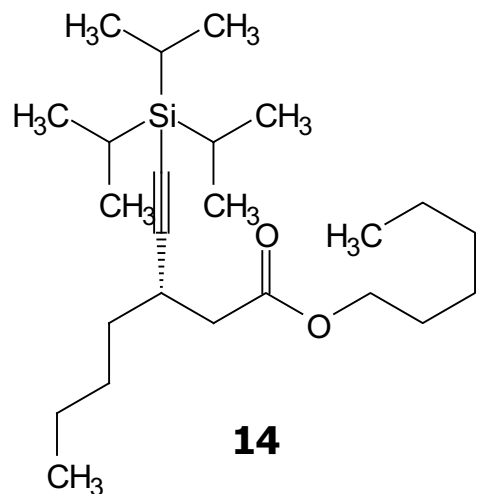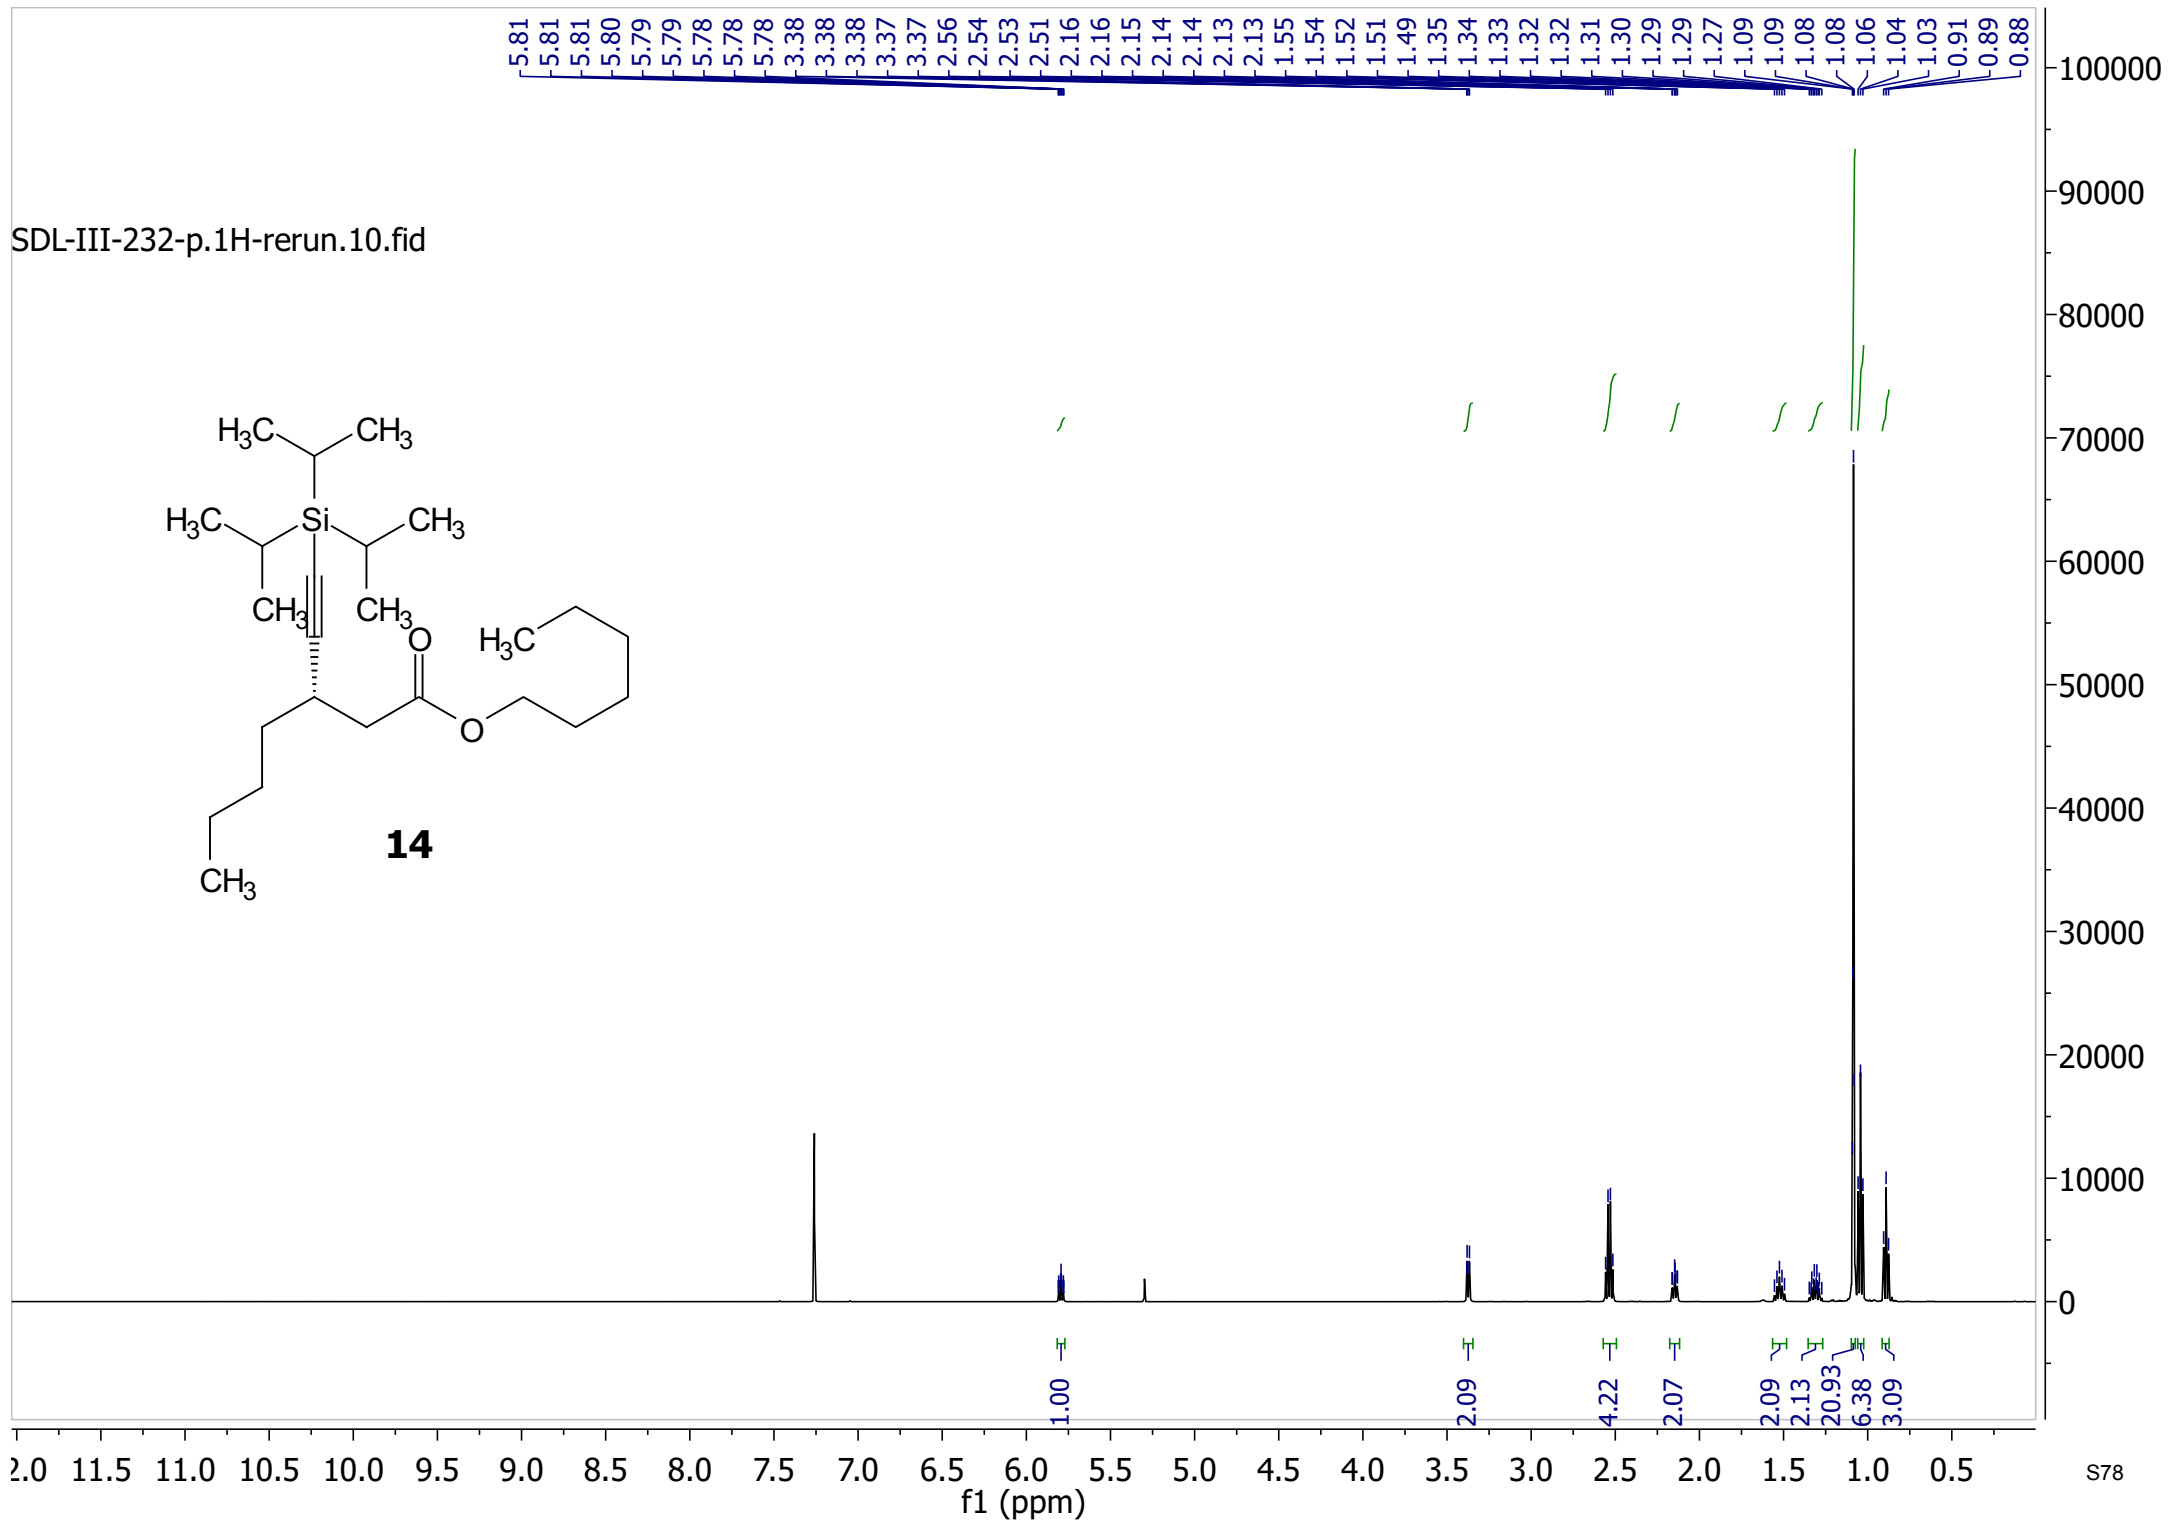

SDL-III-232-p.13C-rerun.10.fid

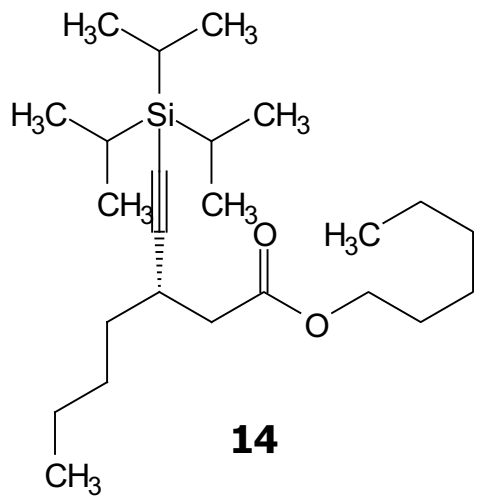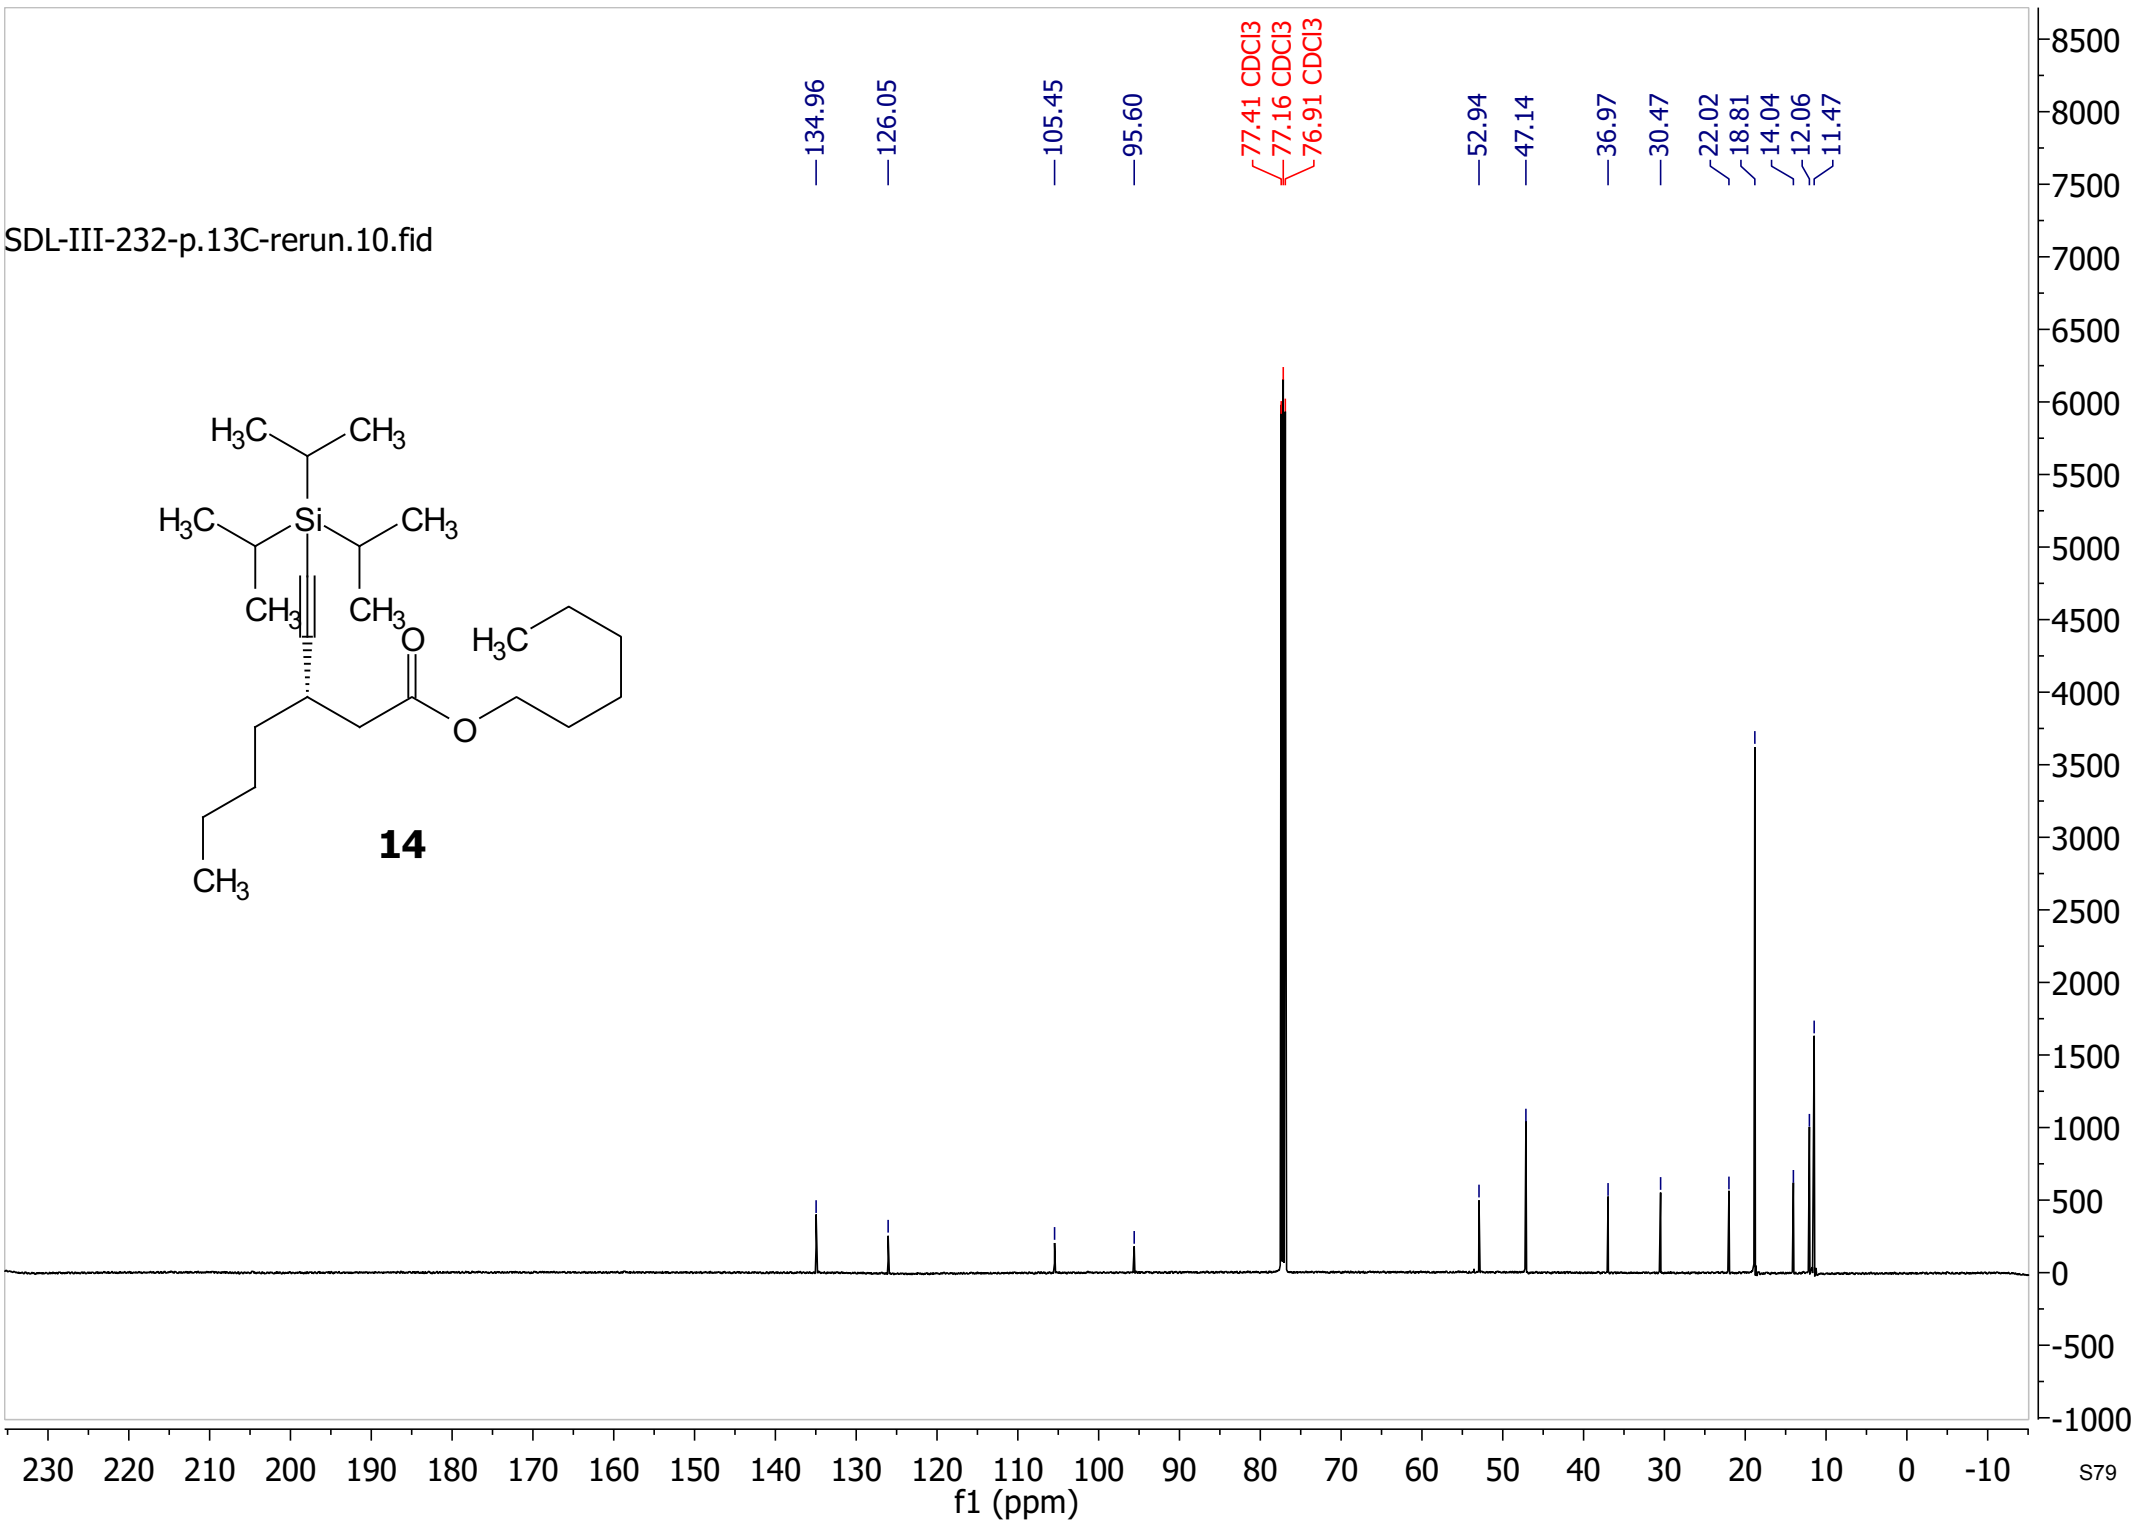

7.26 CDCl3  
-5.10  
-5.09  
-5.07  
-4.07  
-4.06  
-4.05  
-2.33  
-2.31  
-2.30  
-2.28  
-2.13  
-2.11  
-2.10  
-2.09  
-2.04  
-2.02  
-2.01  
-2.00  
-1.98  
-1.97  
-1.95  
-1.94  
-1.93  
-1.68  
-1.64  
-1.63  
-1.62  
-1.60  
-1.59  
-1.39  
-1.37  
-1.36  
-1.35  
-1.33  
-1.33  
-1.32  
-1.31  
-1.30  
-1.30  
-1.28  
-1.27  
-1.26  
-1.25  
-1.24  
-1.24  
-1.23  
-1.22  
-1.22  
-1.22  
-1.21  
-1.20  
-1.20  
-1.19  
-1.18  
-1.18  
-1.17  
-1.15  
-1.14  
-0.94  
-0.92  
-0.90  
-0.89  
-0.88  
-0.87  
-0.86

SDL-II-160-p.1H  
STANDARD PROTON PARAMETERS

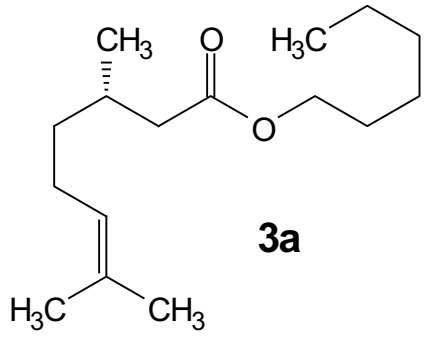

**3a'** = hydrogenated alkene

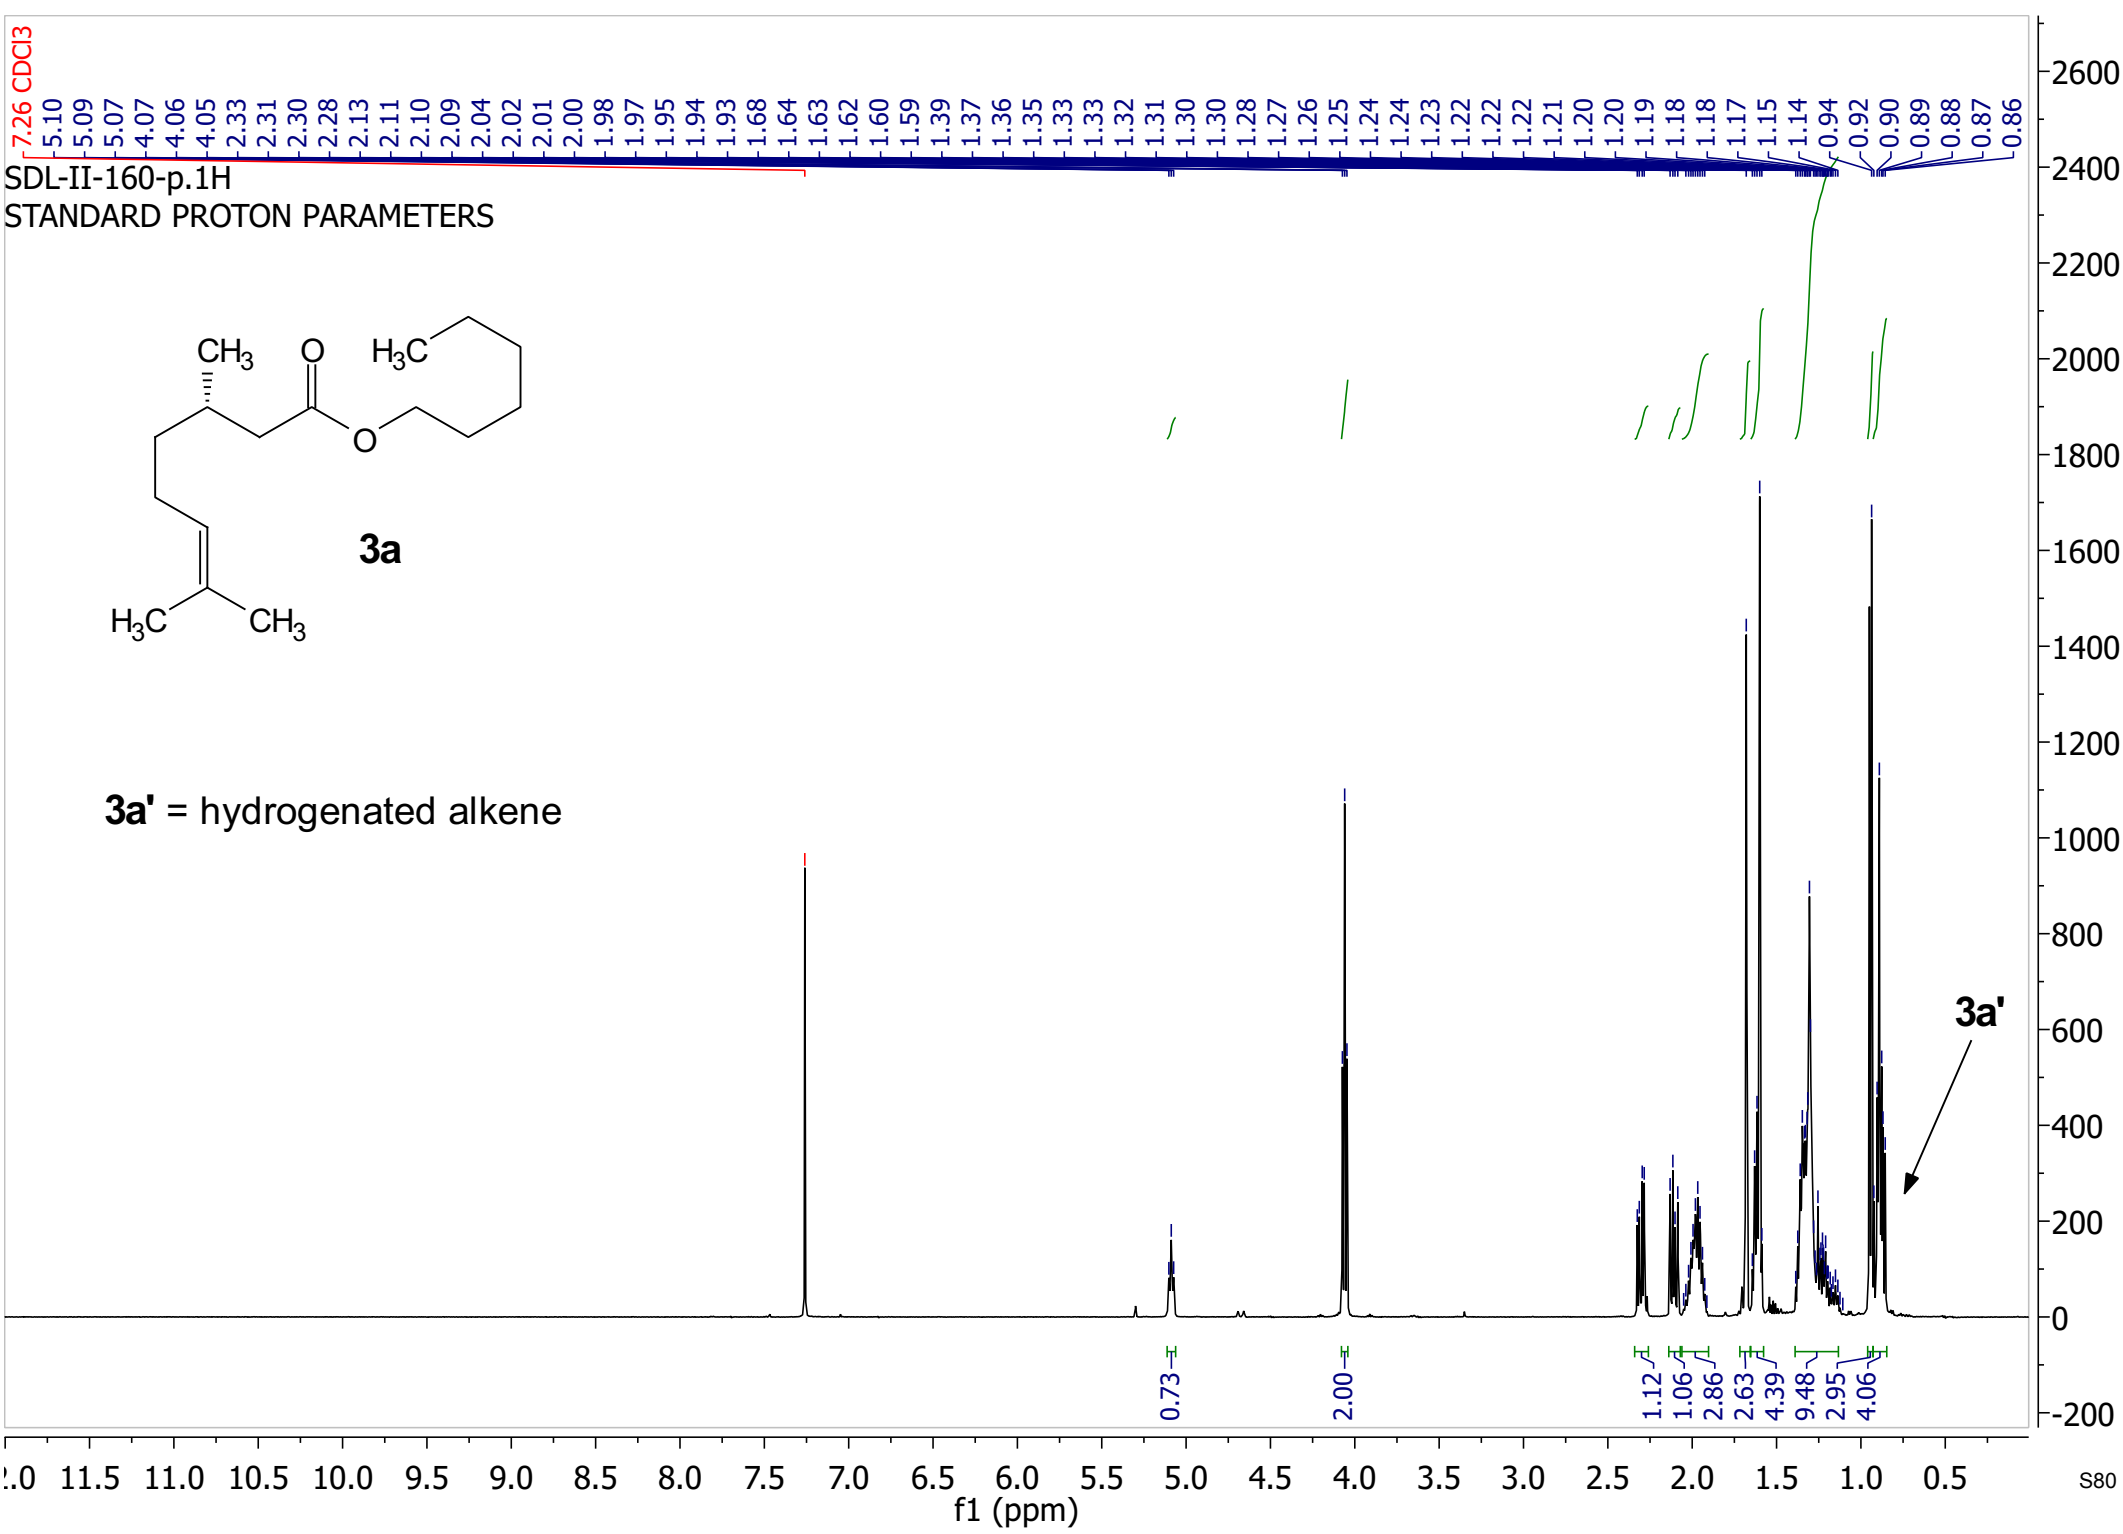



SDL-II-160-p.13C.10.fid

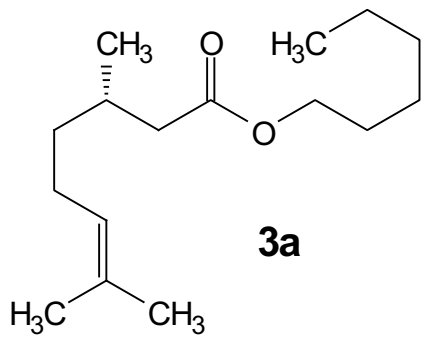

**3a'** = (hydrogenated alkene)

— 173.54

— 131.65

— 124.45

77.41 CDCl<sub>3</sub>

77.16 CDCl<sub>3</sub>

76.91 CDCl<sub>3</sub>

64.49

42.16 3a'

42.06

39.22 3a'

37.10 3a'

36.94

31.59

30.58 3a'

30.23

28.79

28.08 3a'

25.86

25.78

25.58

24.80 3a'

22.81 3a'

22.70

19.90 3a'

19.78

17.79

14.15

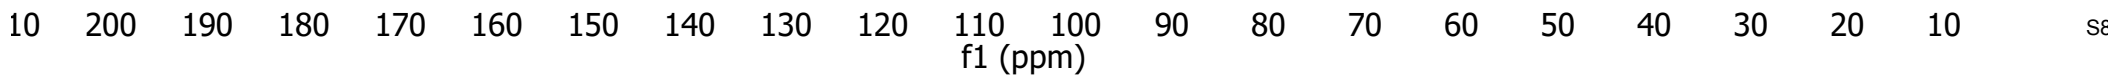

7.26 CDCl3  
 5.10  
 5.09  
 5.09  
 5.09  
 5.08  
 4.15  
 4.13  
 4.12  
 4.11  
 2.32  
 2.31  
 2.29  
 2.28  
 2.13  
 2.11  
 2.10  
 2.08  
 2.01  
 2.00  
 2.00  
 2.00  
 2.00  
 2.00  
 1.99  
 1.99  
 1.98  
 1.98  
 1.97  
 1.97  
 1.97  
 1.96  
 1.95  
 1.95  
 1.95  
 1.94  
 1.68  
 1.68  
 1.60  
 1.60  
 1.36  
 1.35  
 1.35  
 1.34  
 1.33  
 1.33  
 1.33  
 1.32  
 1.30  
 1.27  
 1.26  
 1.26  
 1.24  
 1.24  
 1.24  
 1.23  
 1.23  
 1.22  
 1.22  
 1.21  
 0.95  
 0.94  
 0.87  
 0.87  
 0.86  
 0.86

SDL-III-47-p.1H.10.fid

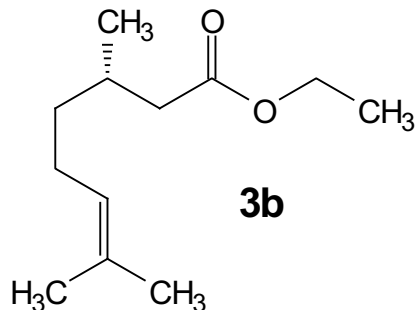

**3b'** = hydrogenated alkene

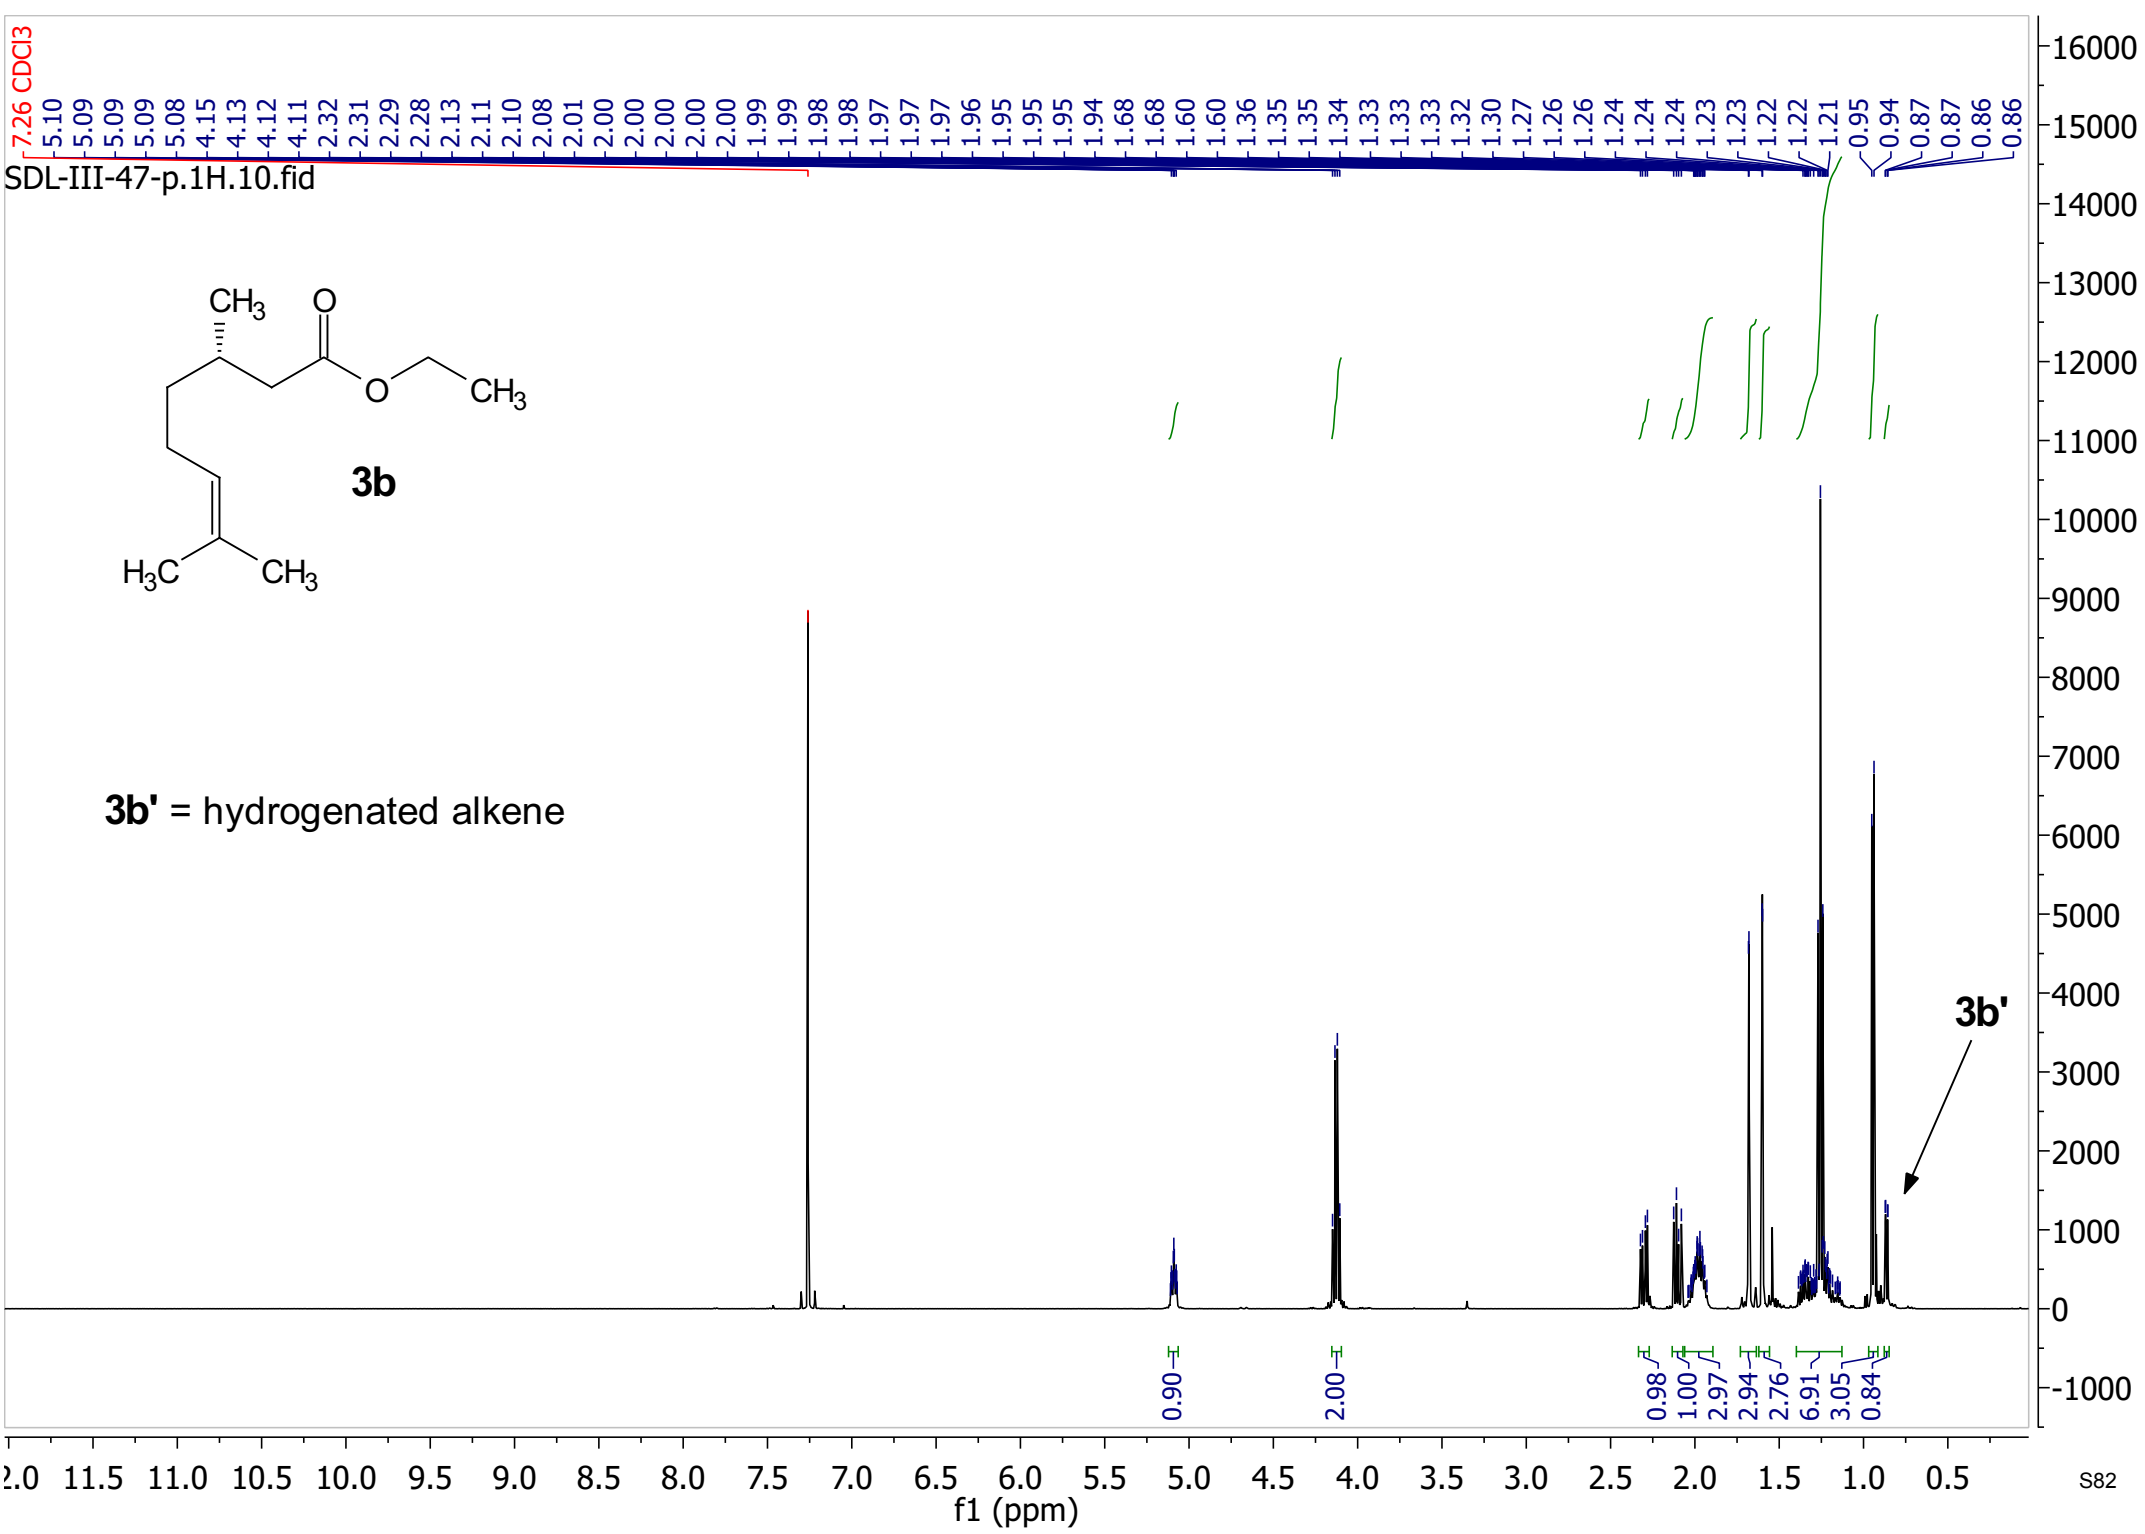

**3b'**

SDL-III-47-p.13C.10.fid

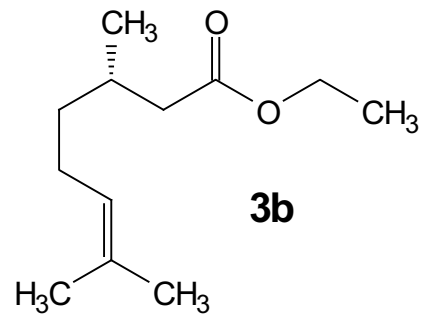

**3b'** = (hydrogenated alkene)

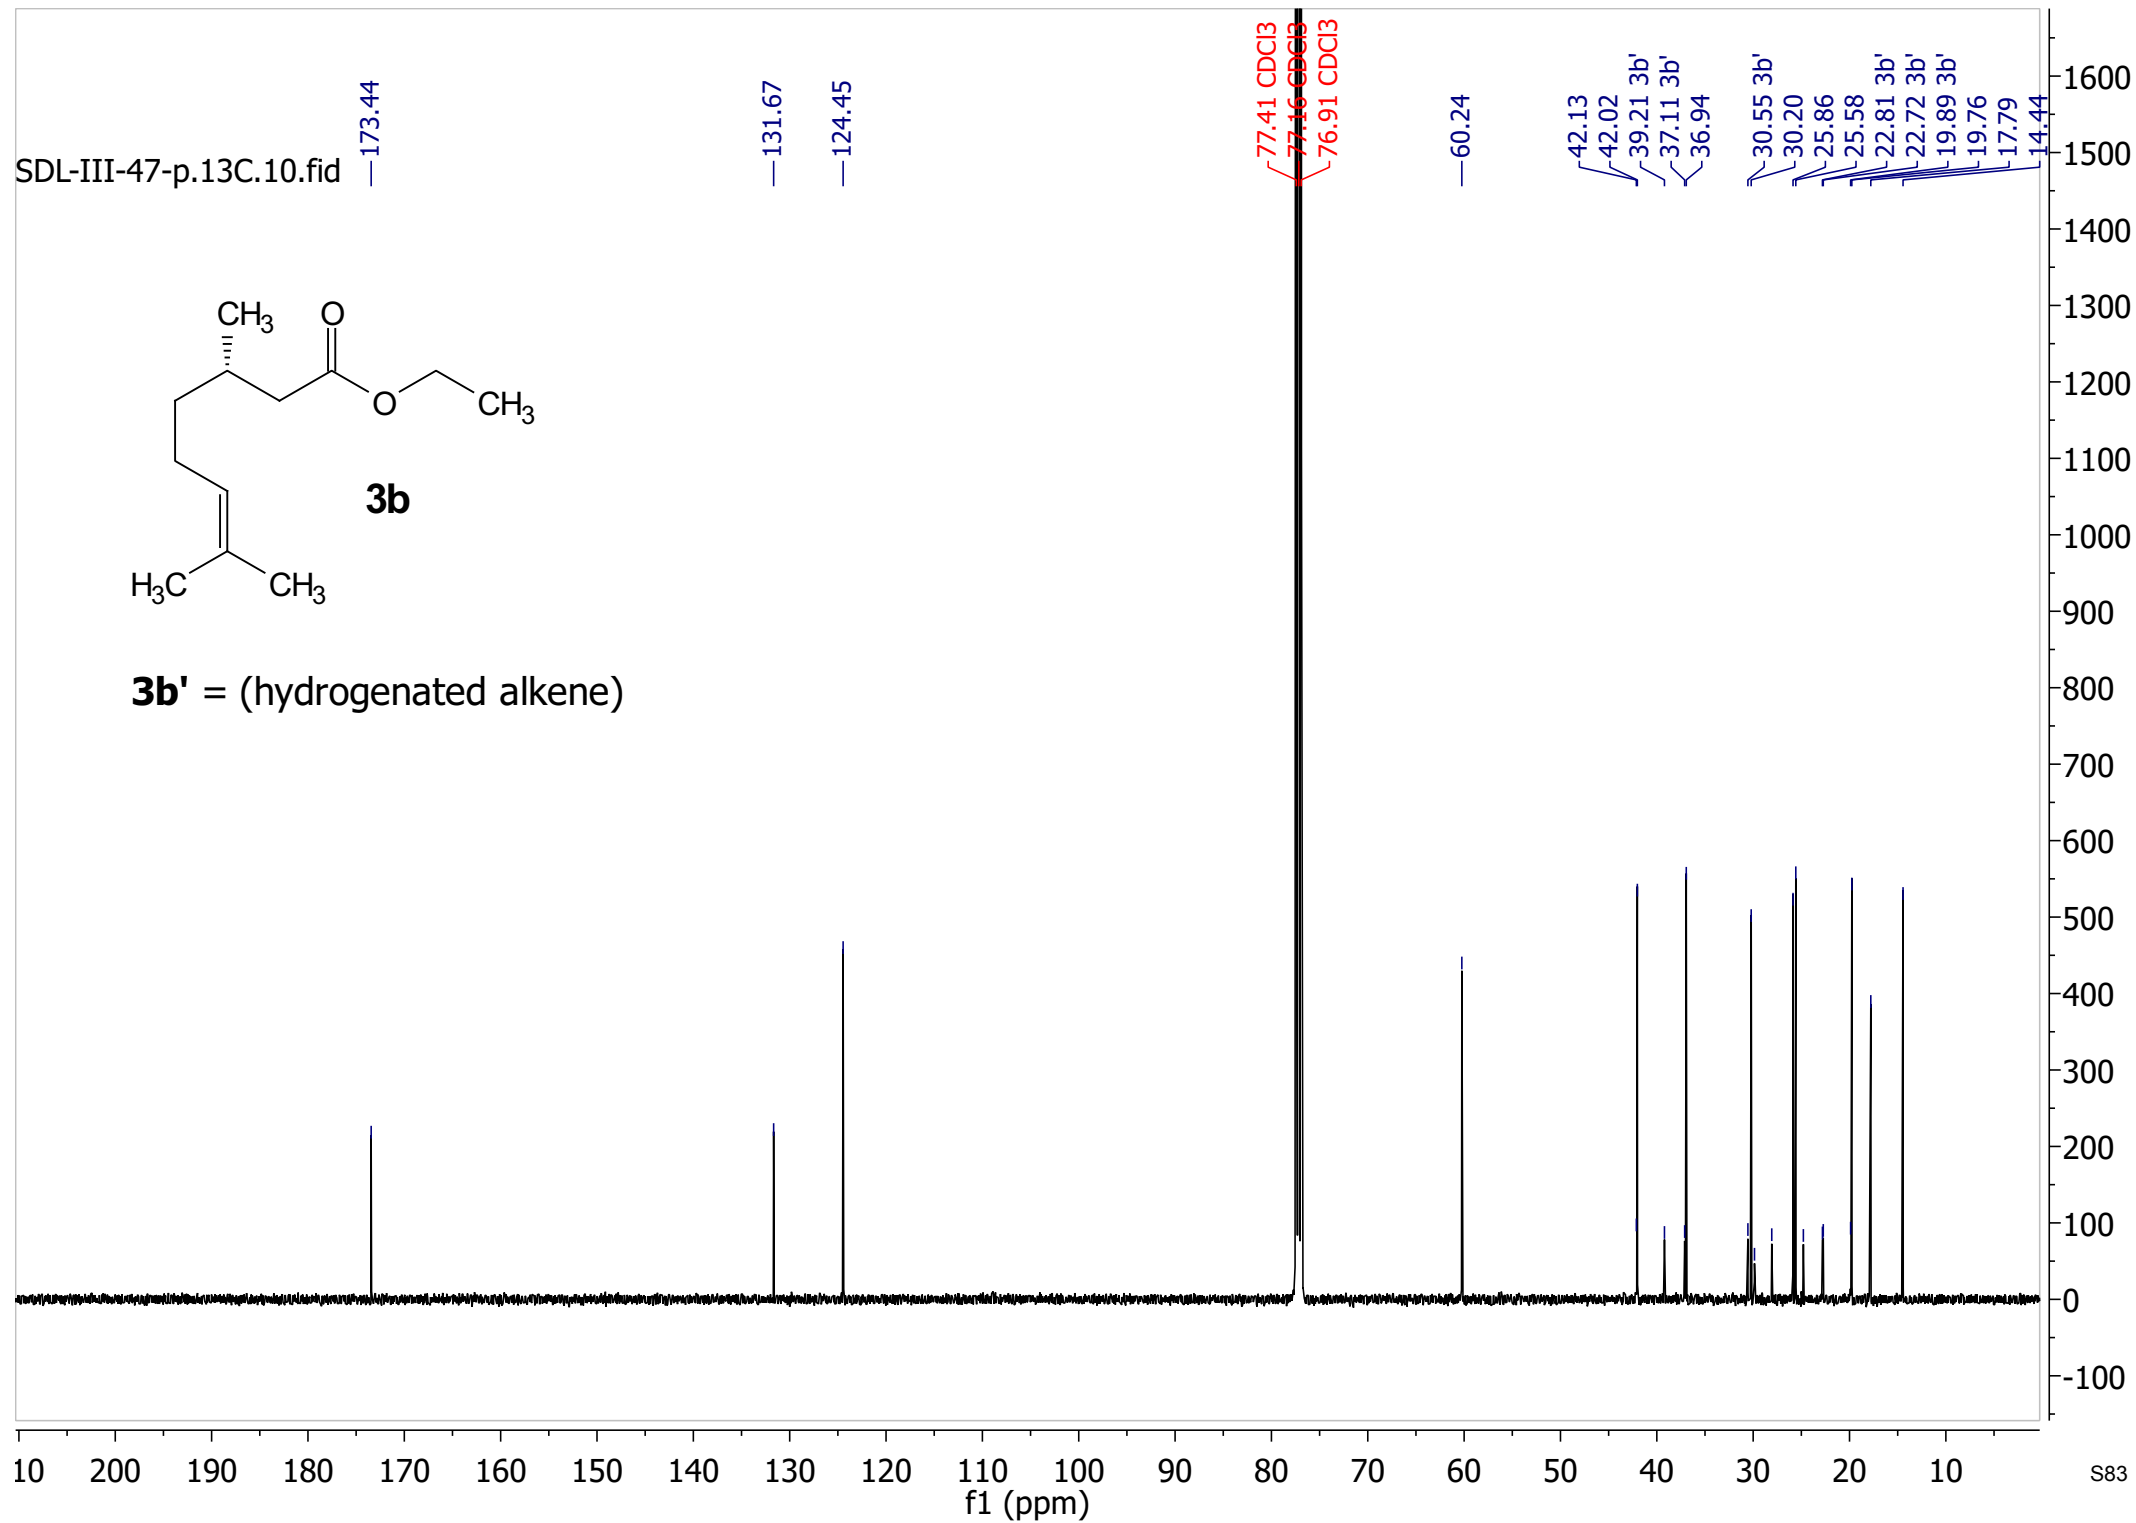

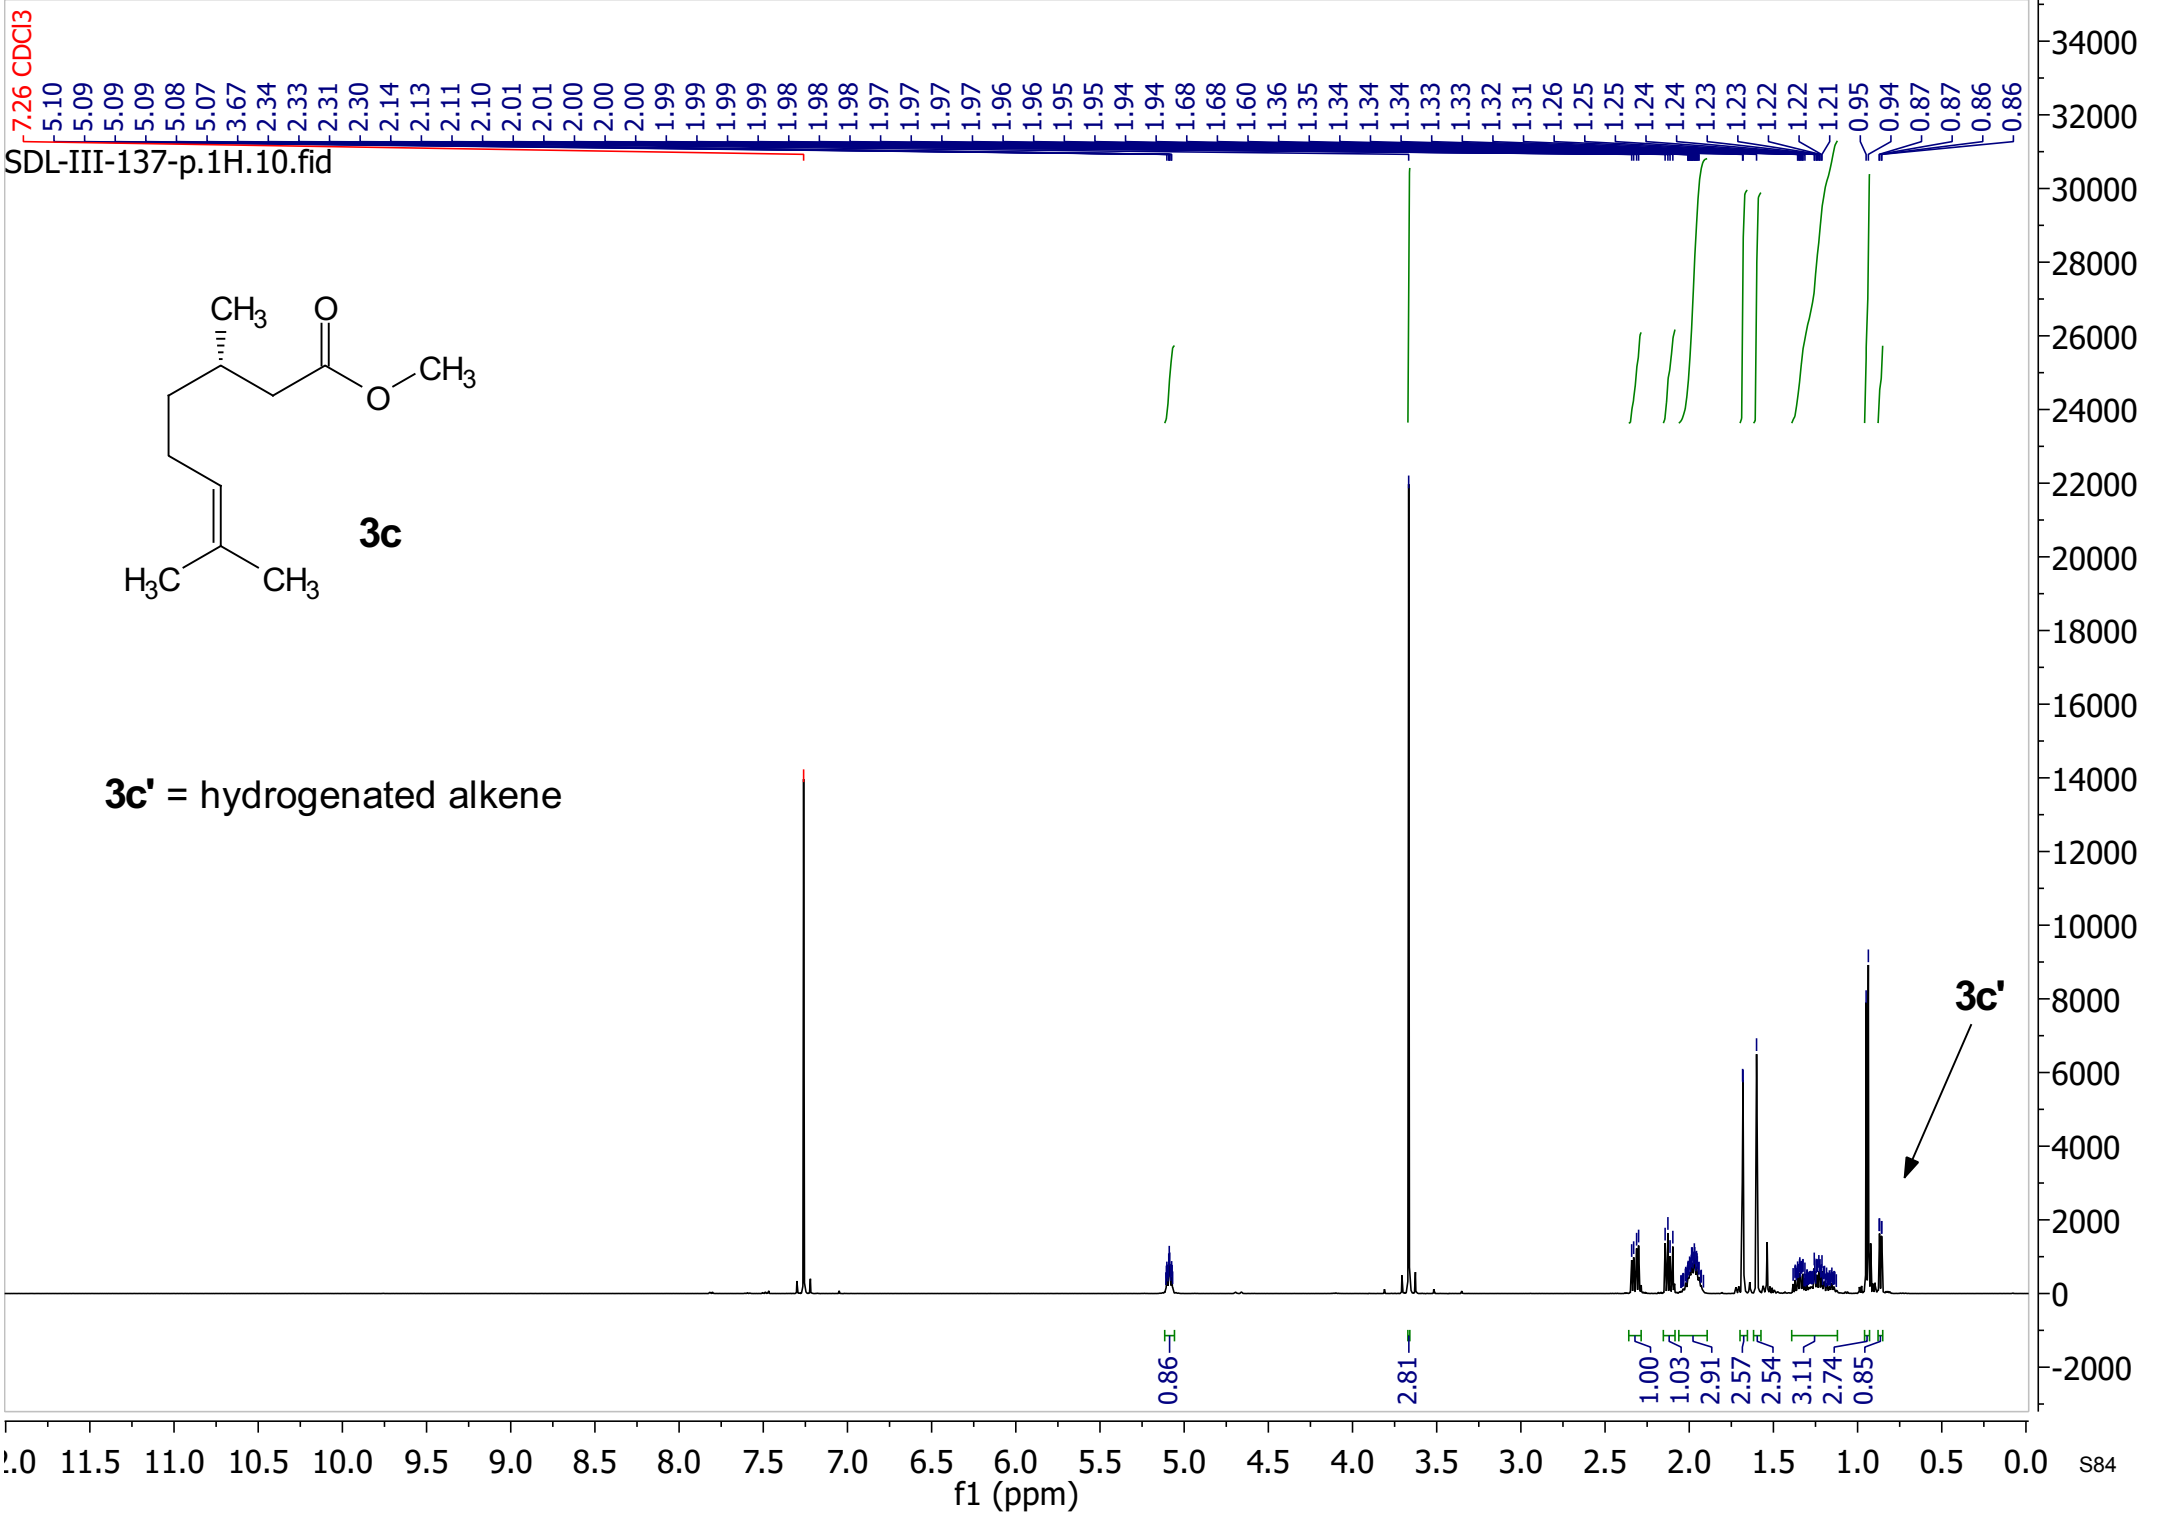

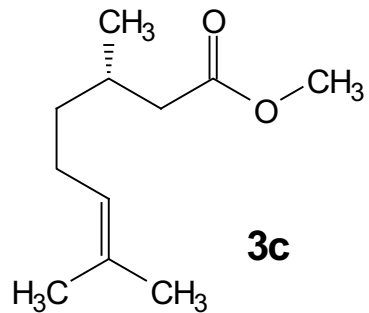

**3c'** = (hydrogenated alkene)

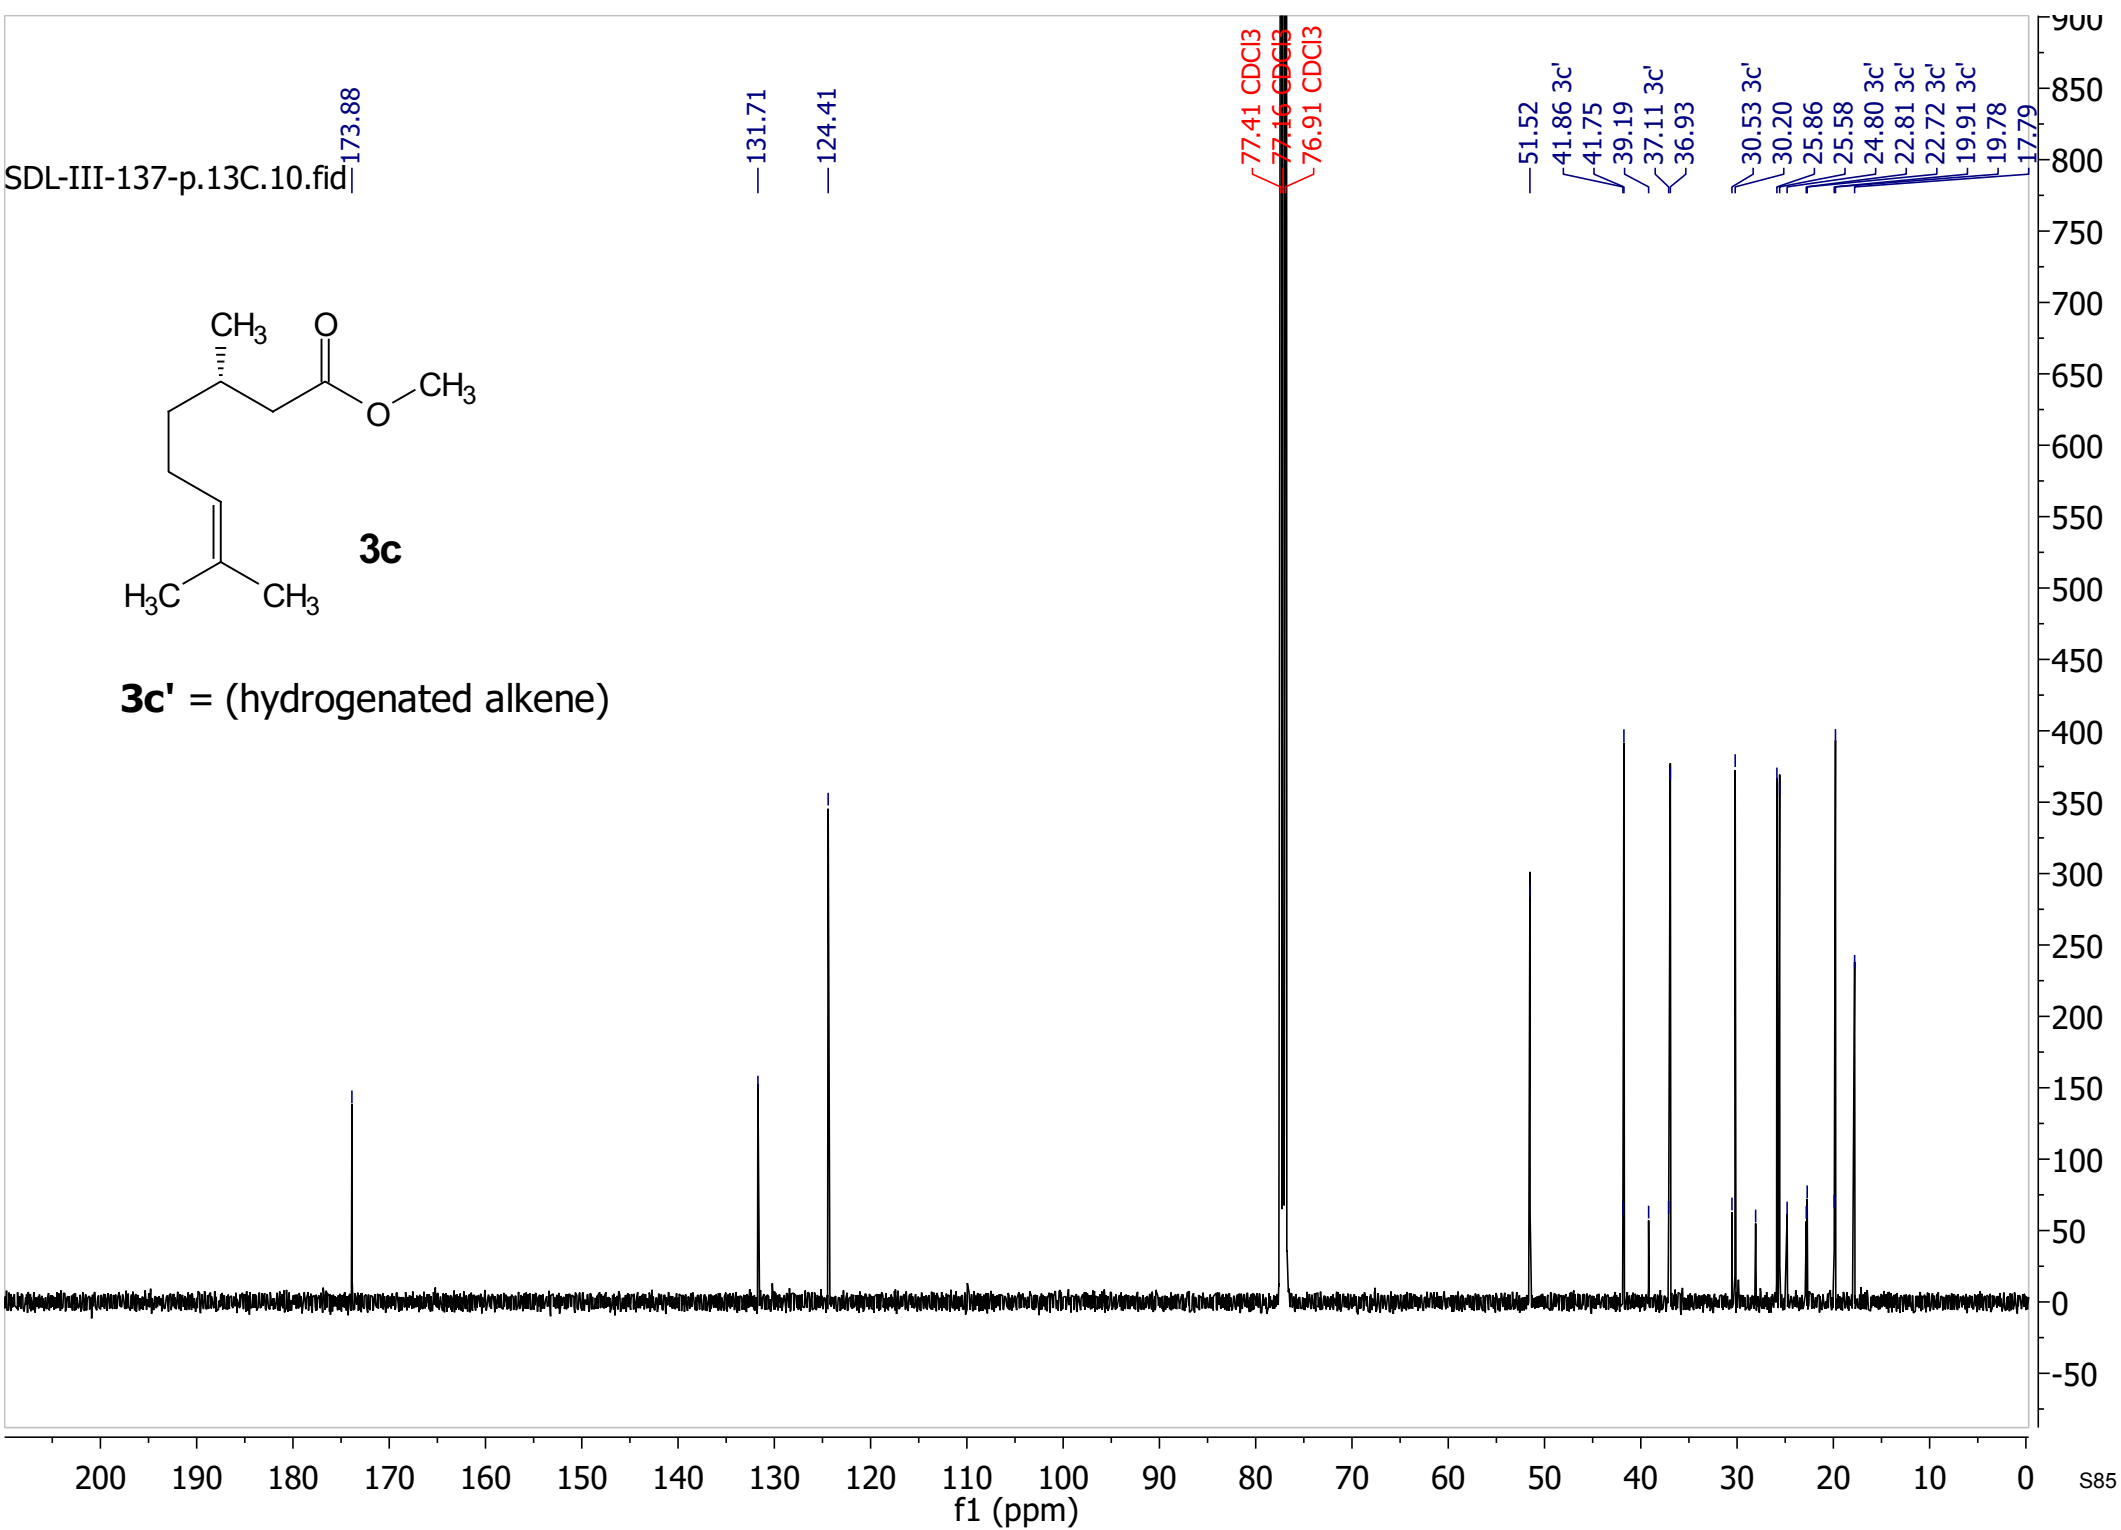

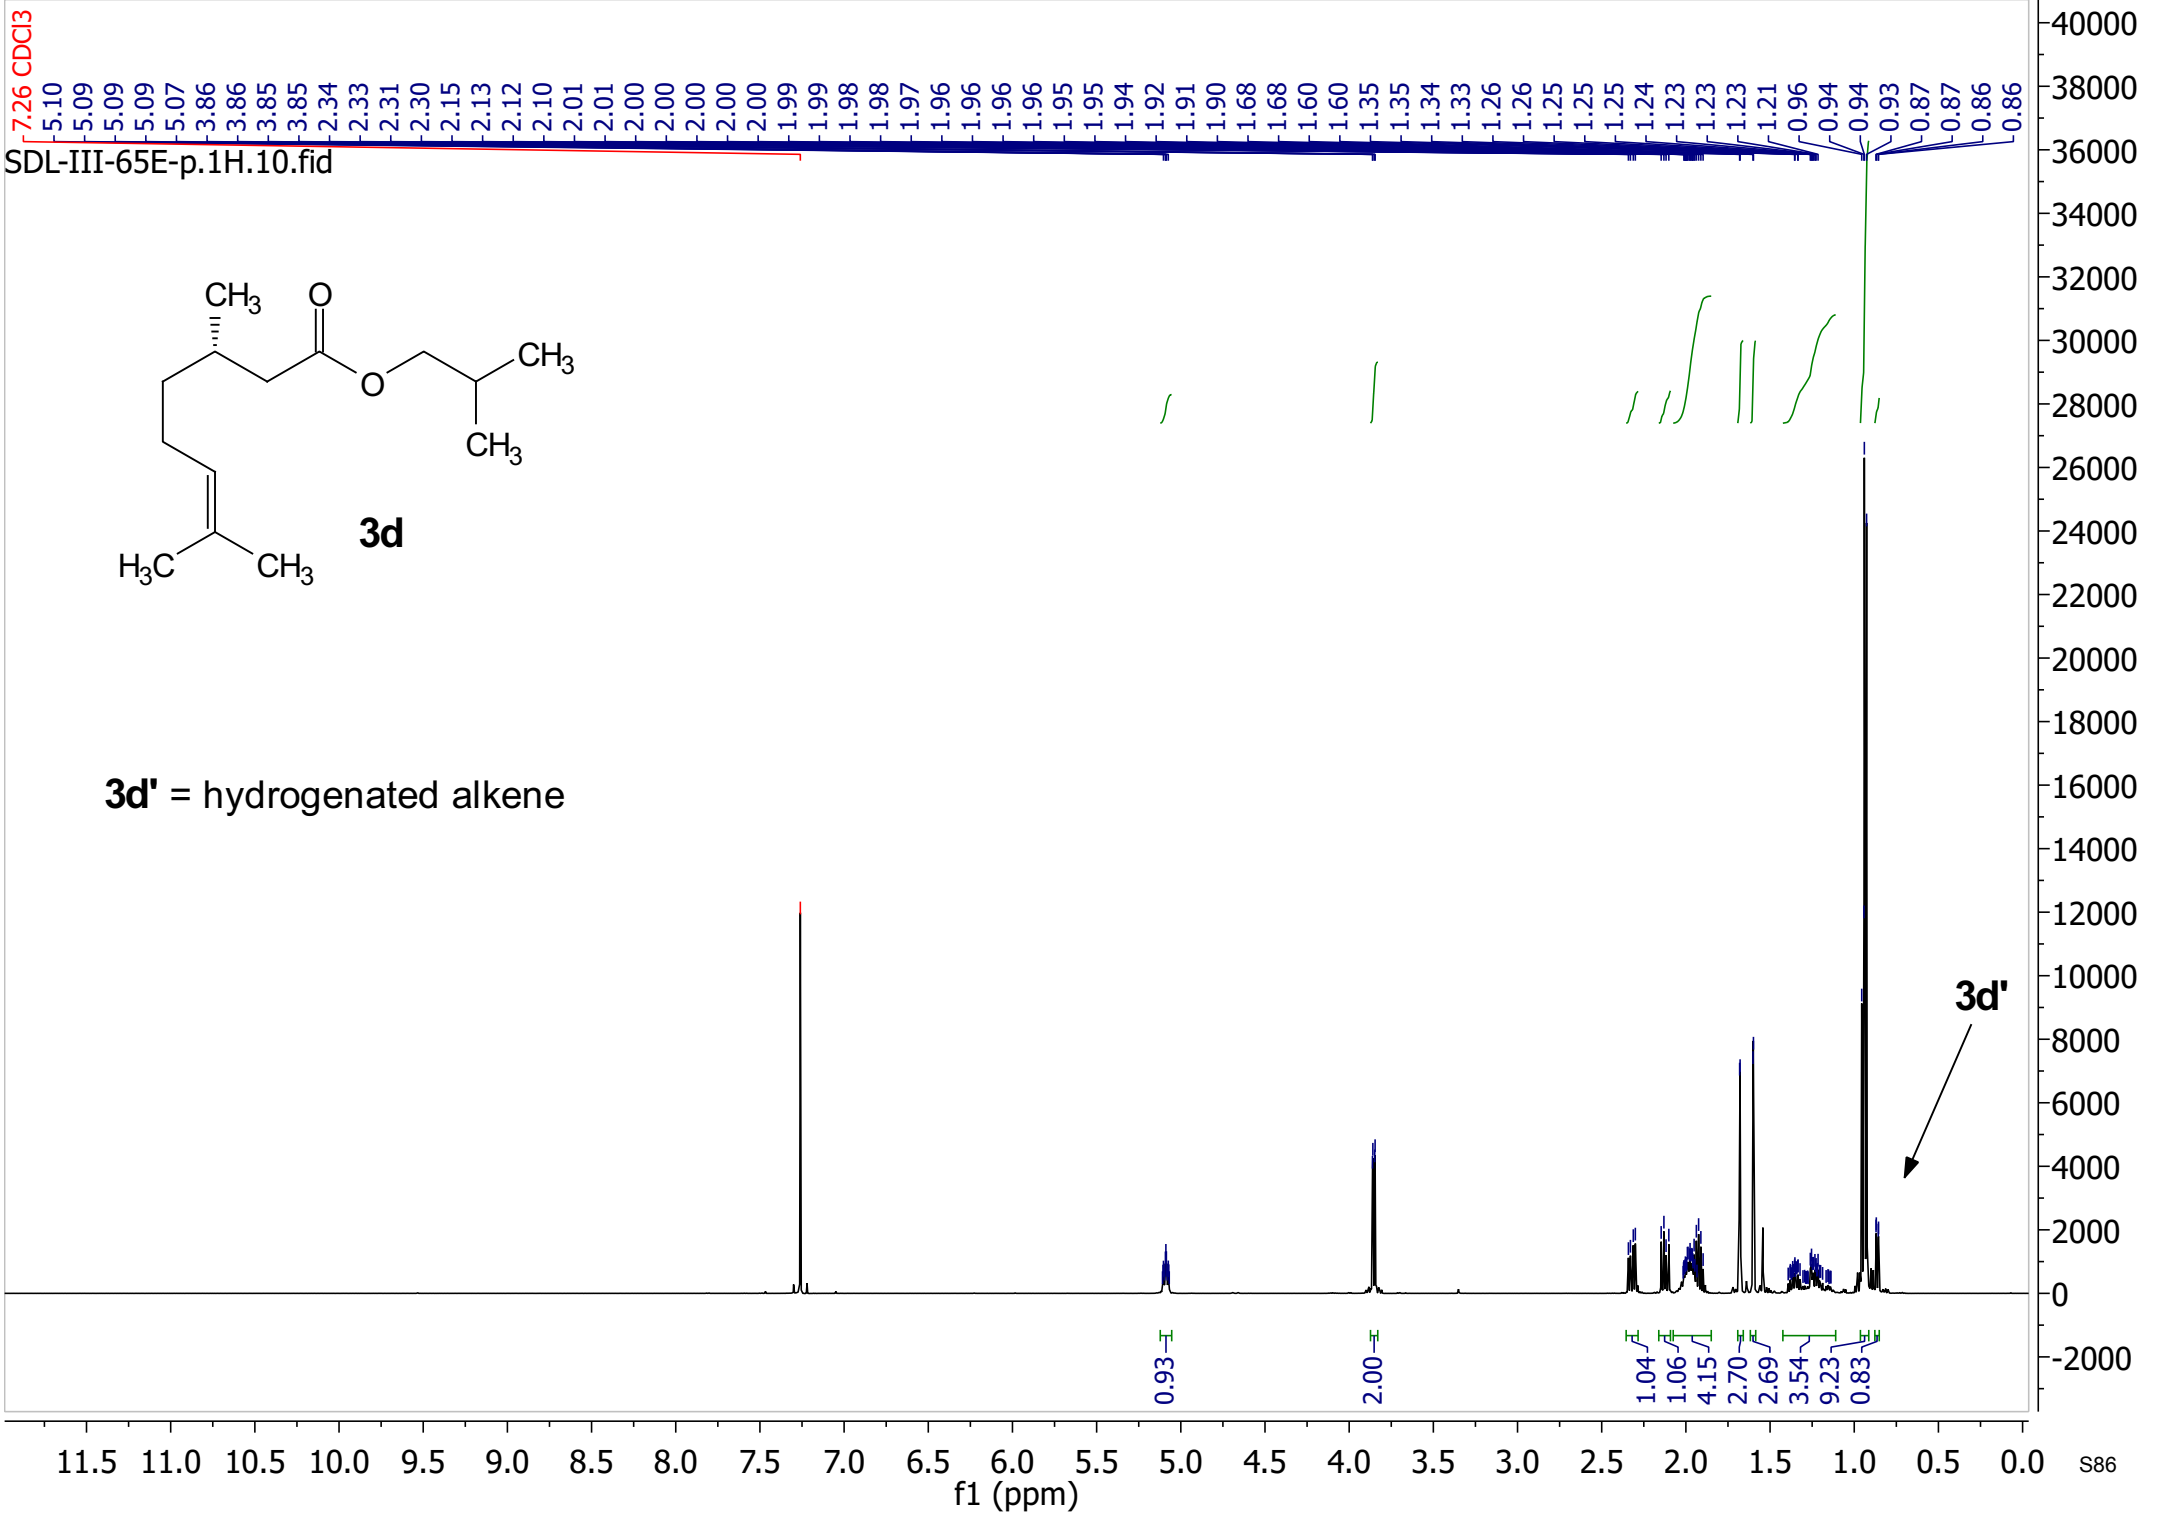

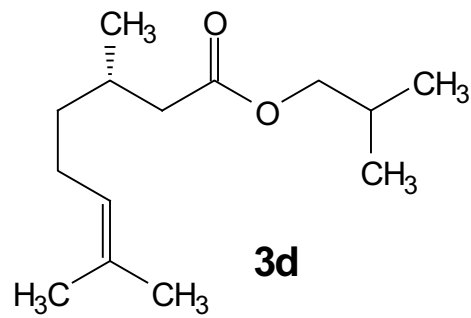

**3d'** = hydrogenated alkene

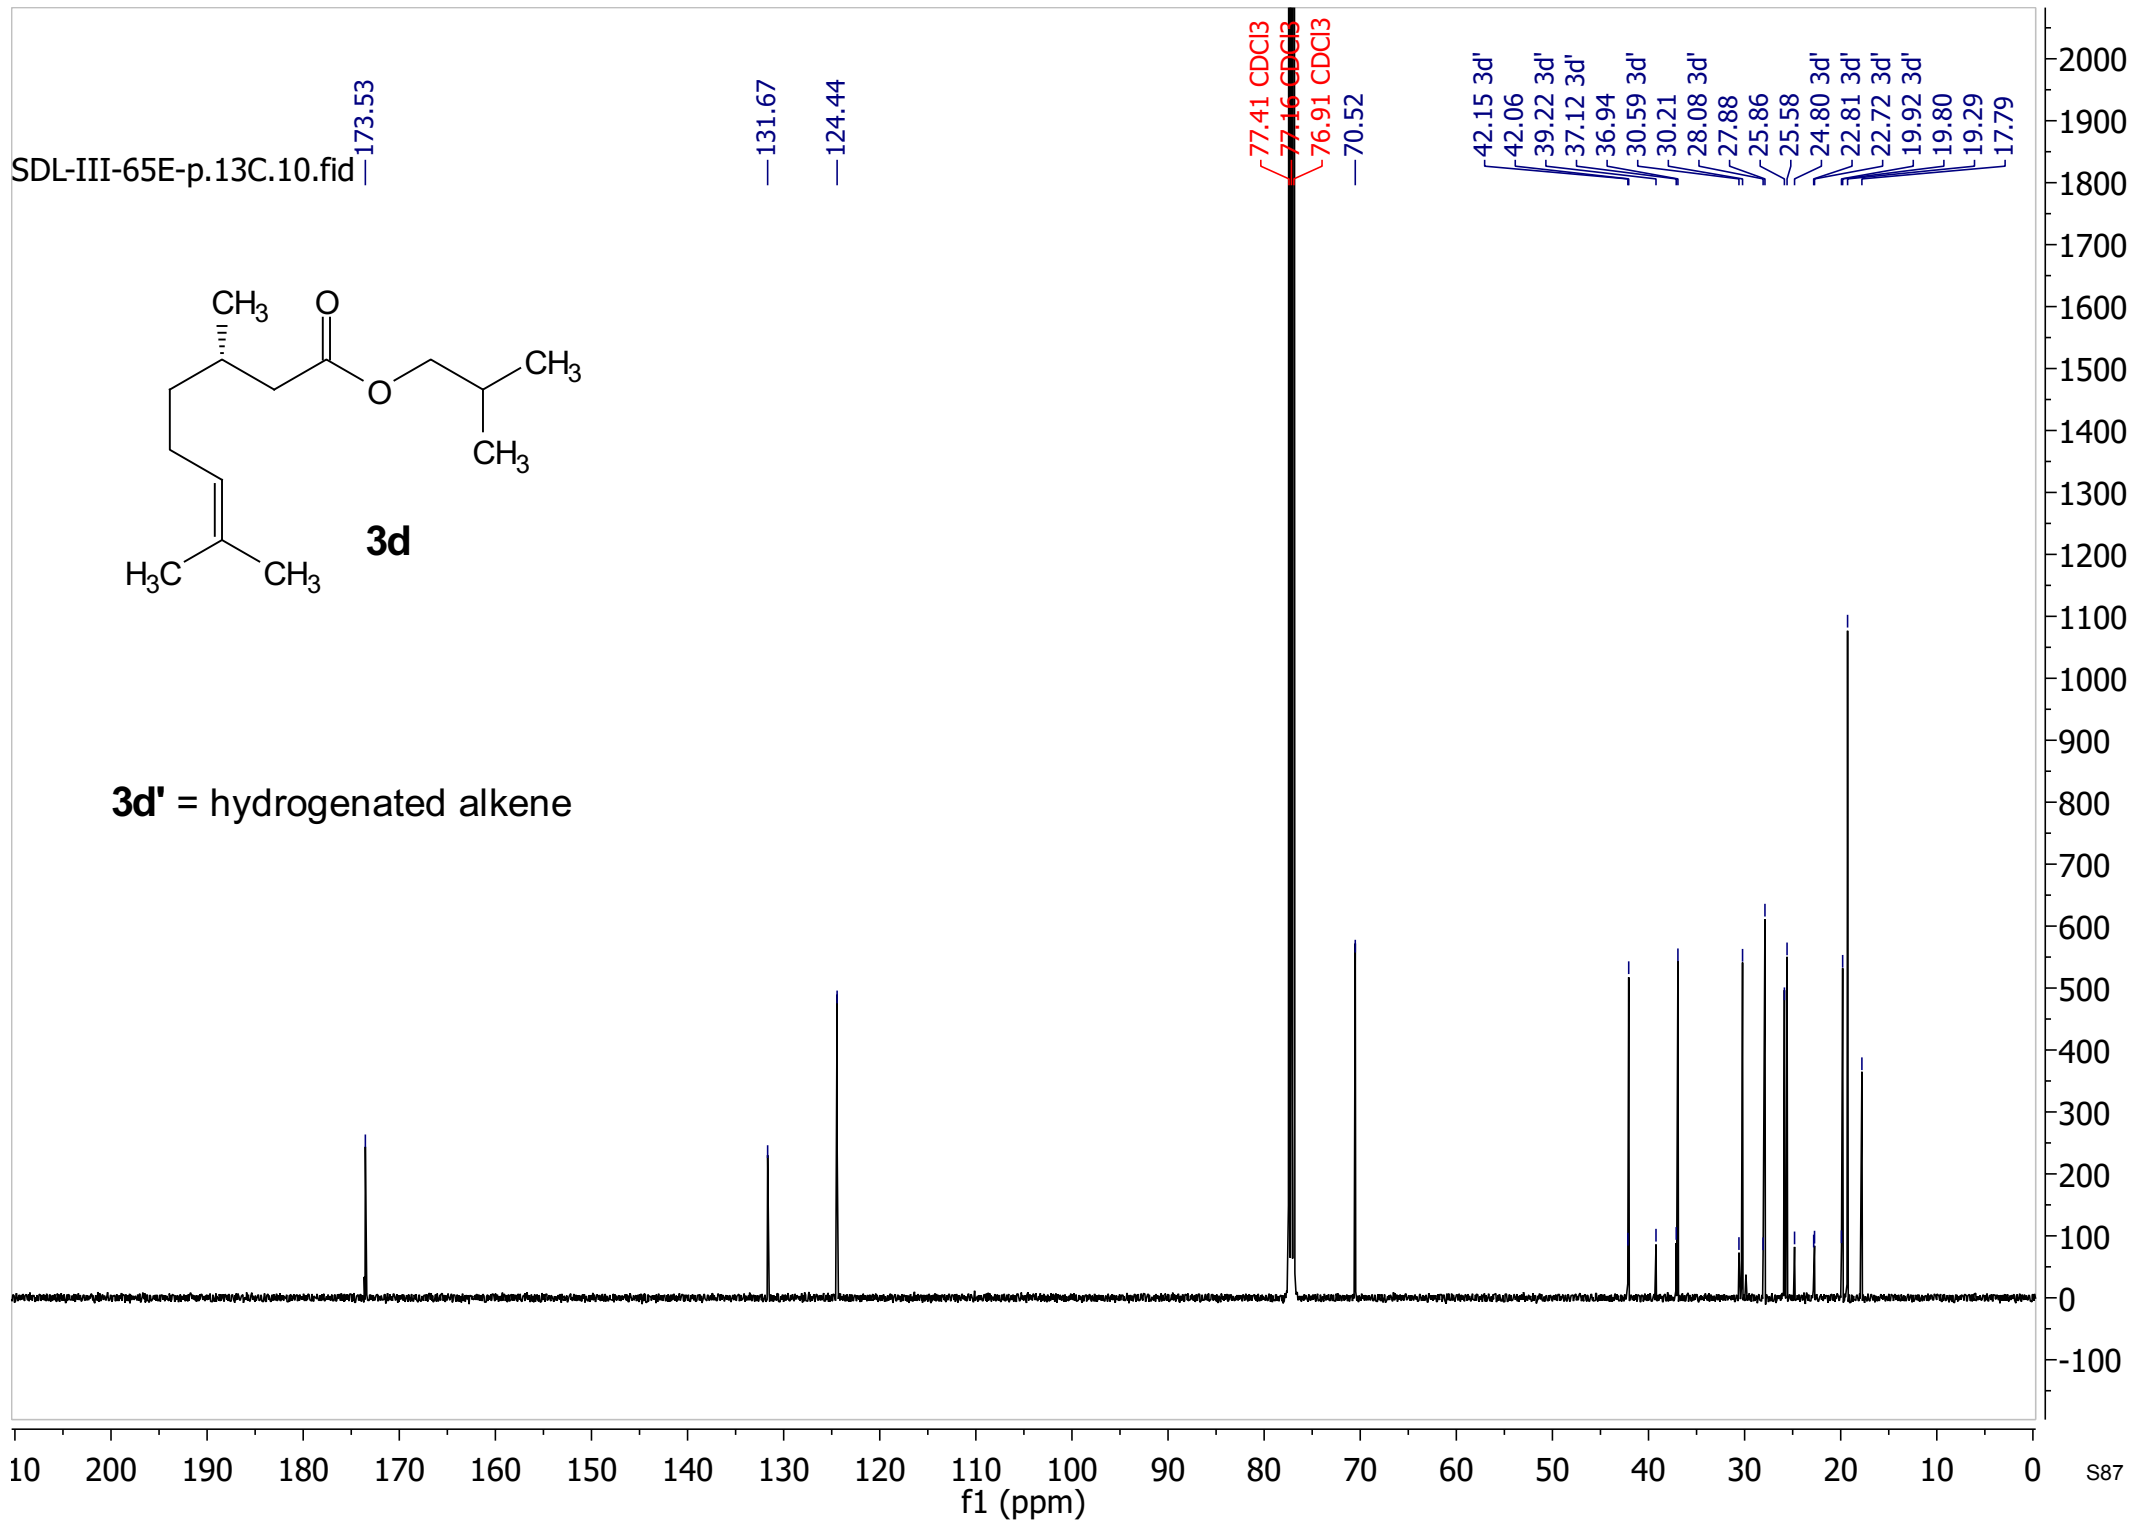

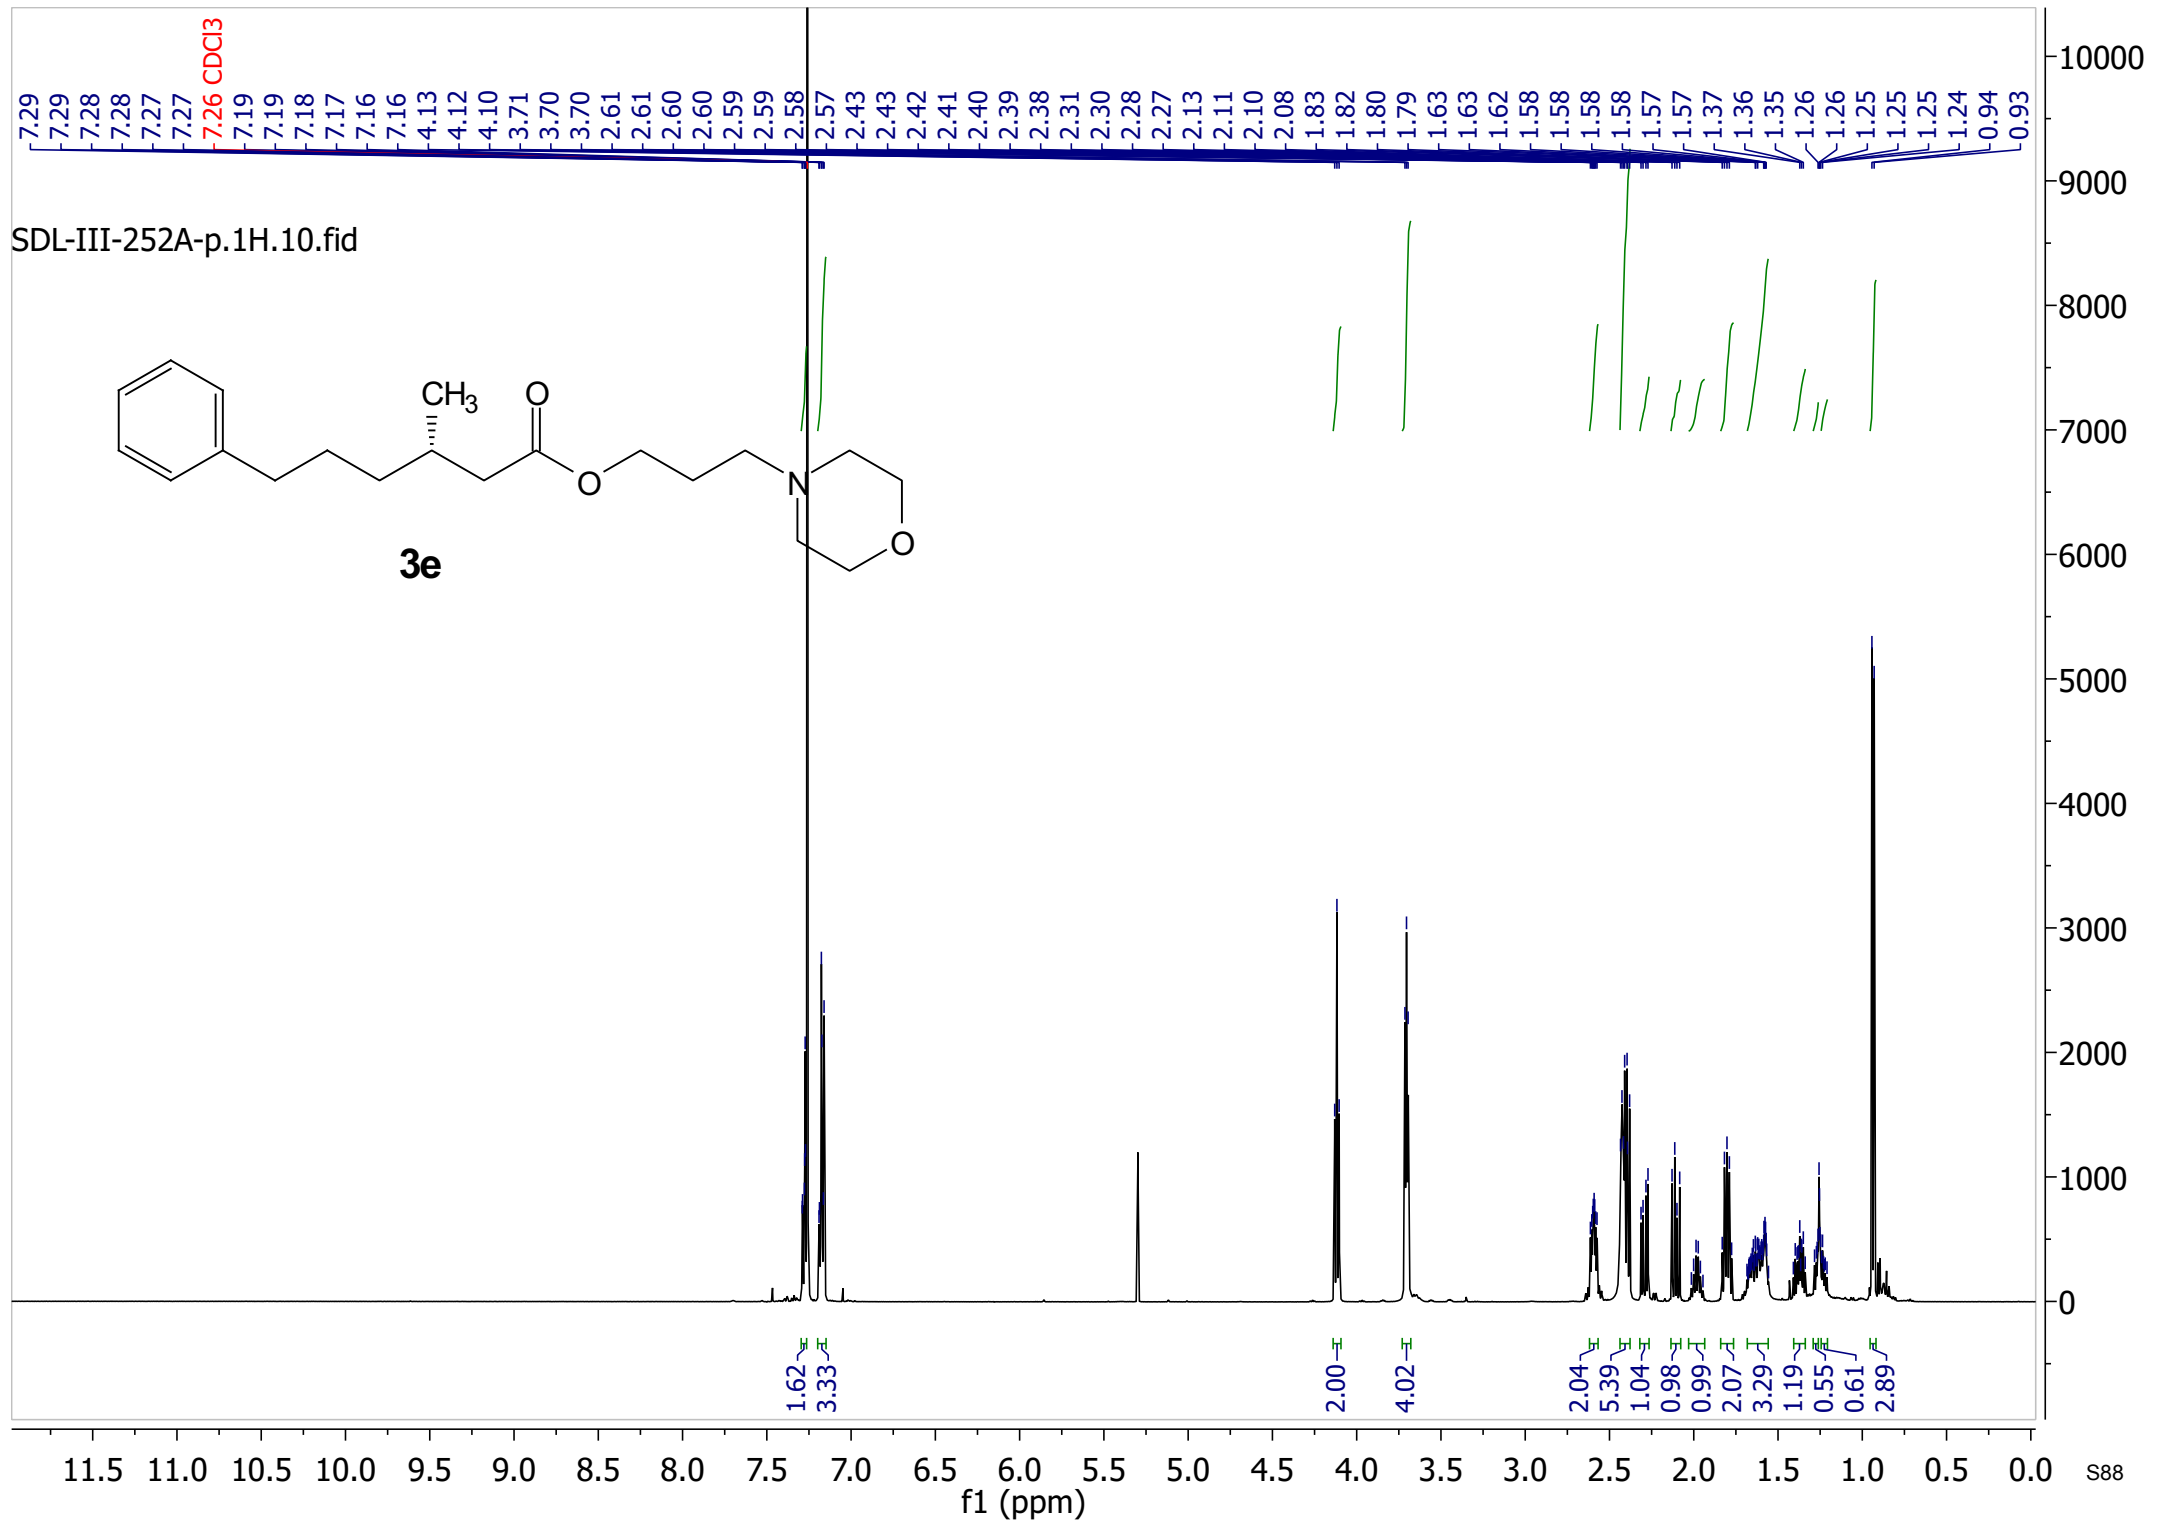



SDL-III-252A-p.13C.10.fid

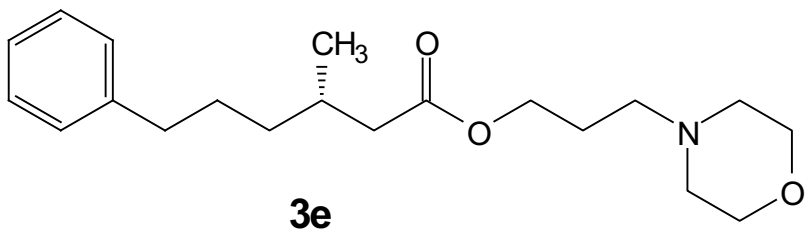

—173.40

—142.64

—128.50

—128.42

—125.84

77.42 CDCl3

77.16 CDCl3

76.91 CDCl3

—67.14

—62.67

—55.59

—53.85

—41.98

—36.48

—36.17

—30.45

—28.99

—26.02

—19.85

200 190 180 170 160 150 140 130 120 110 100 90 80 70 60 50 40 30 20 10

f1 (ppm)

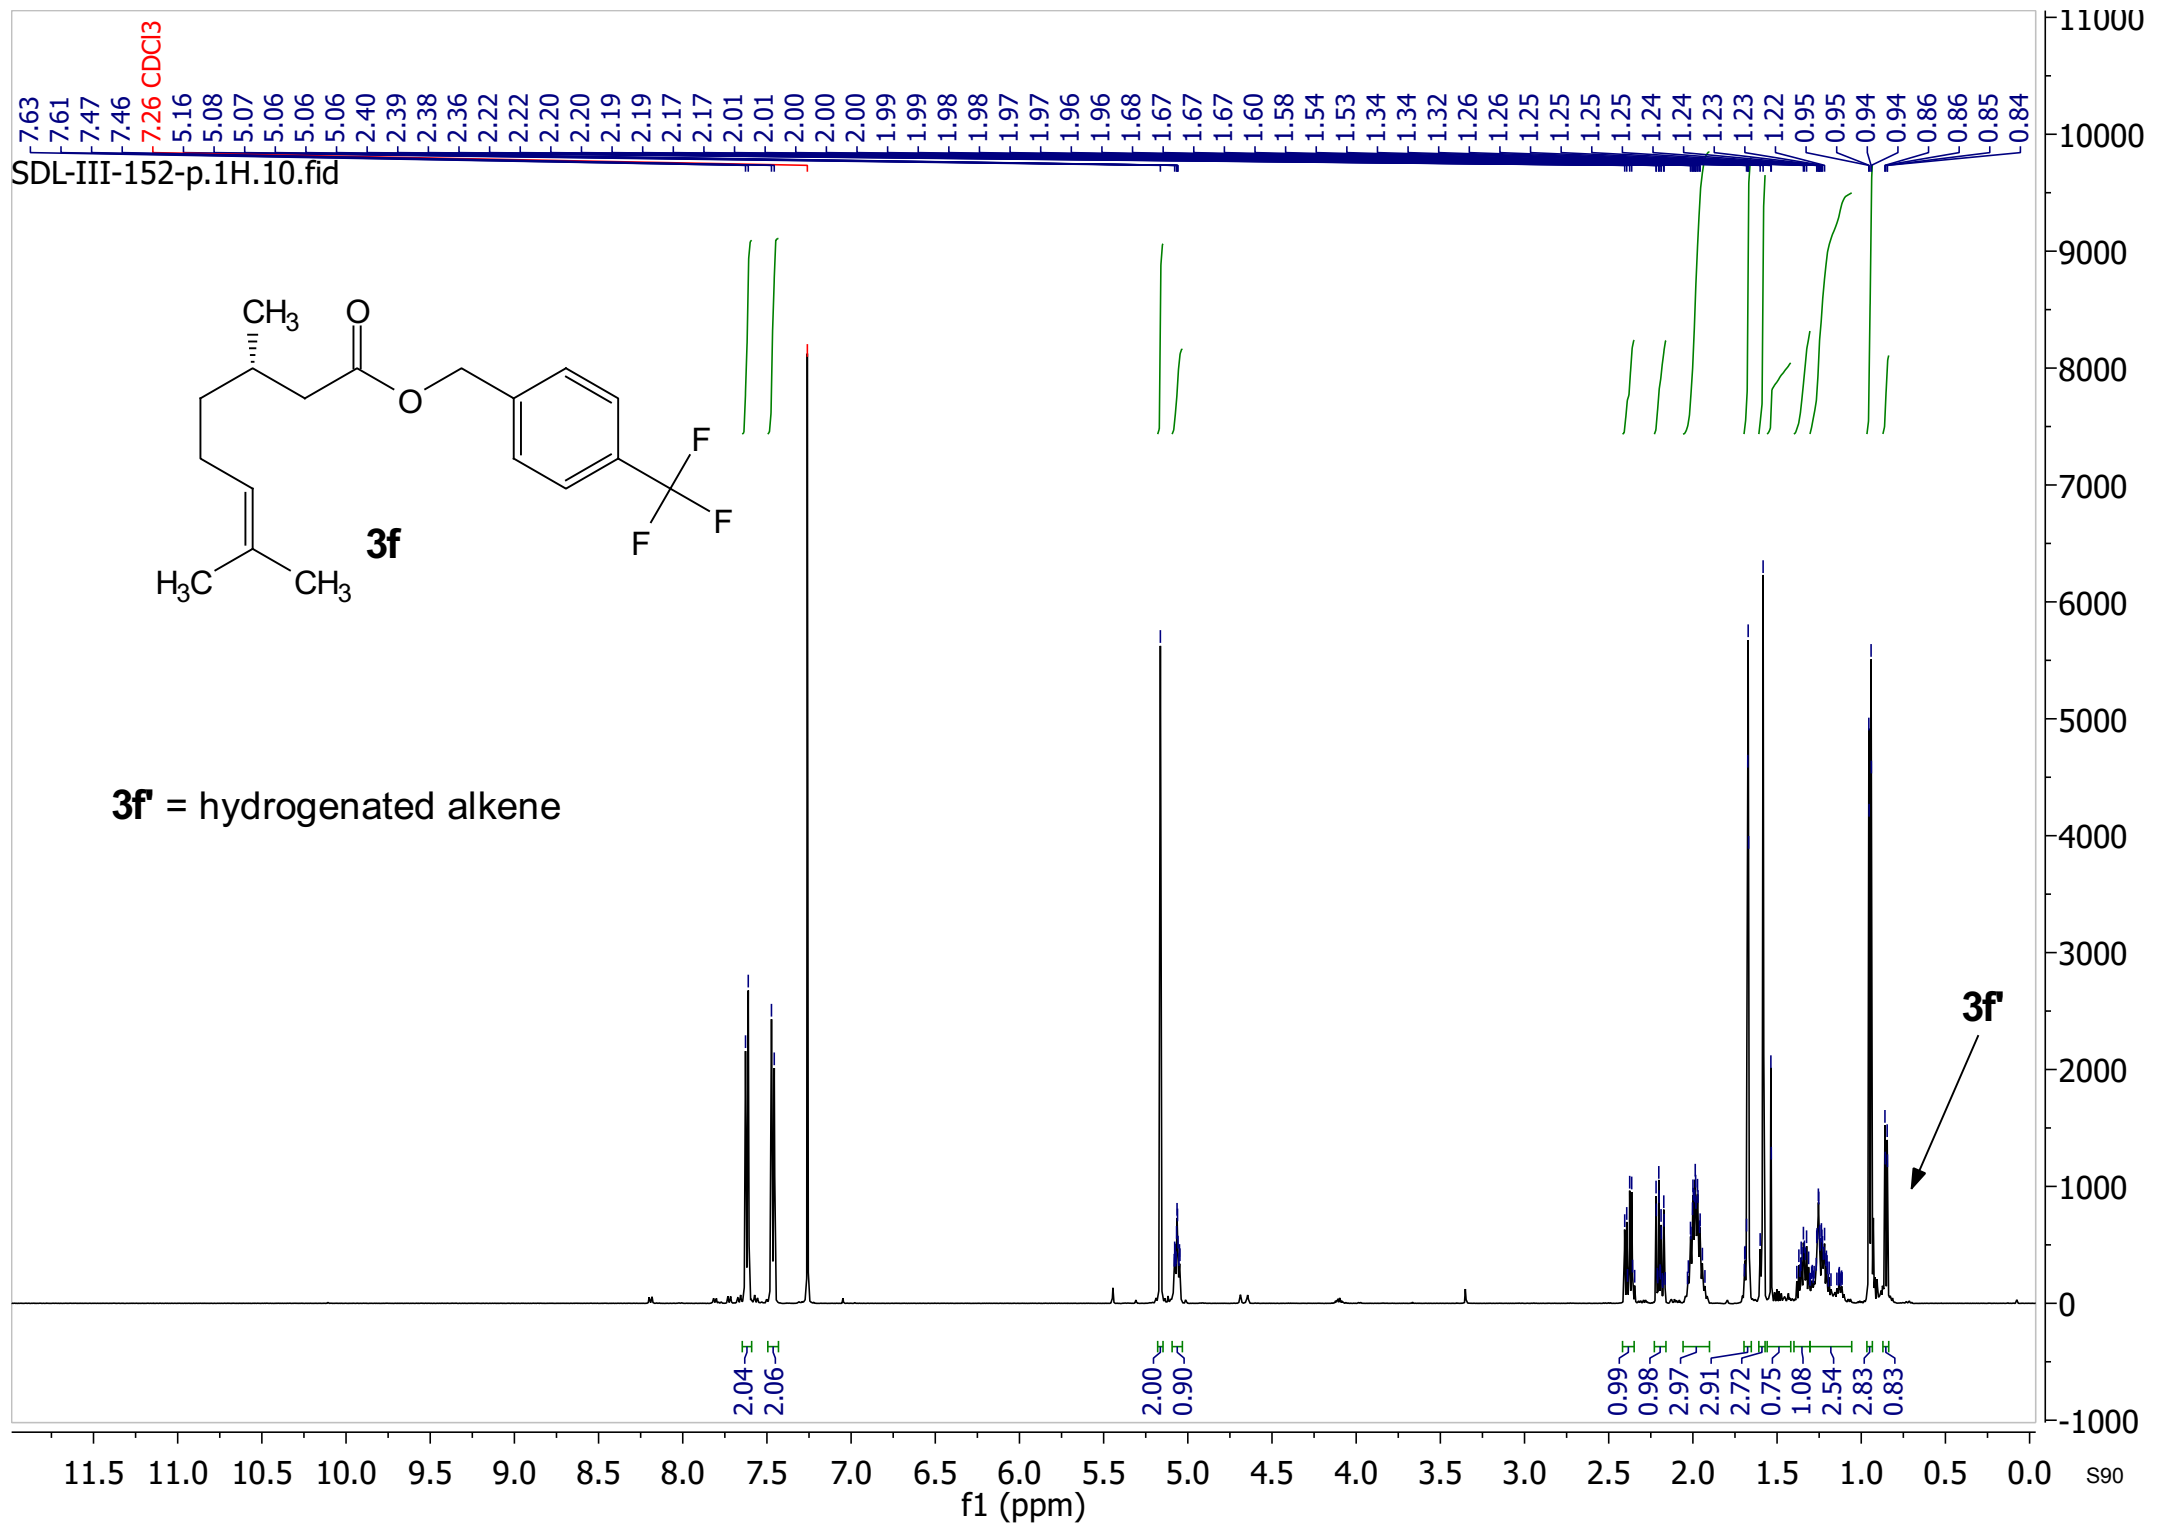

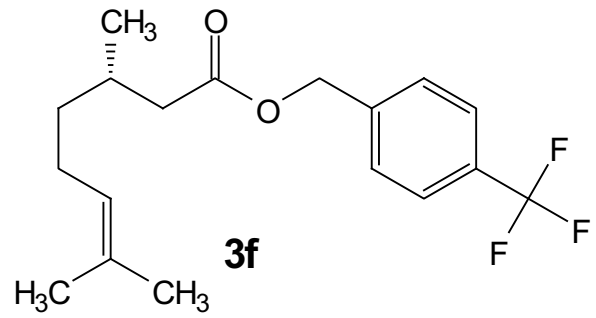

**3f** = hydrogenated alkene

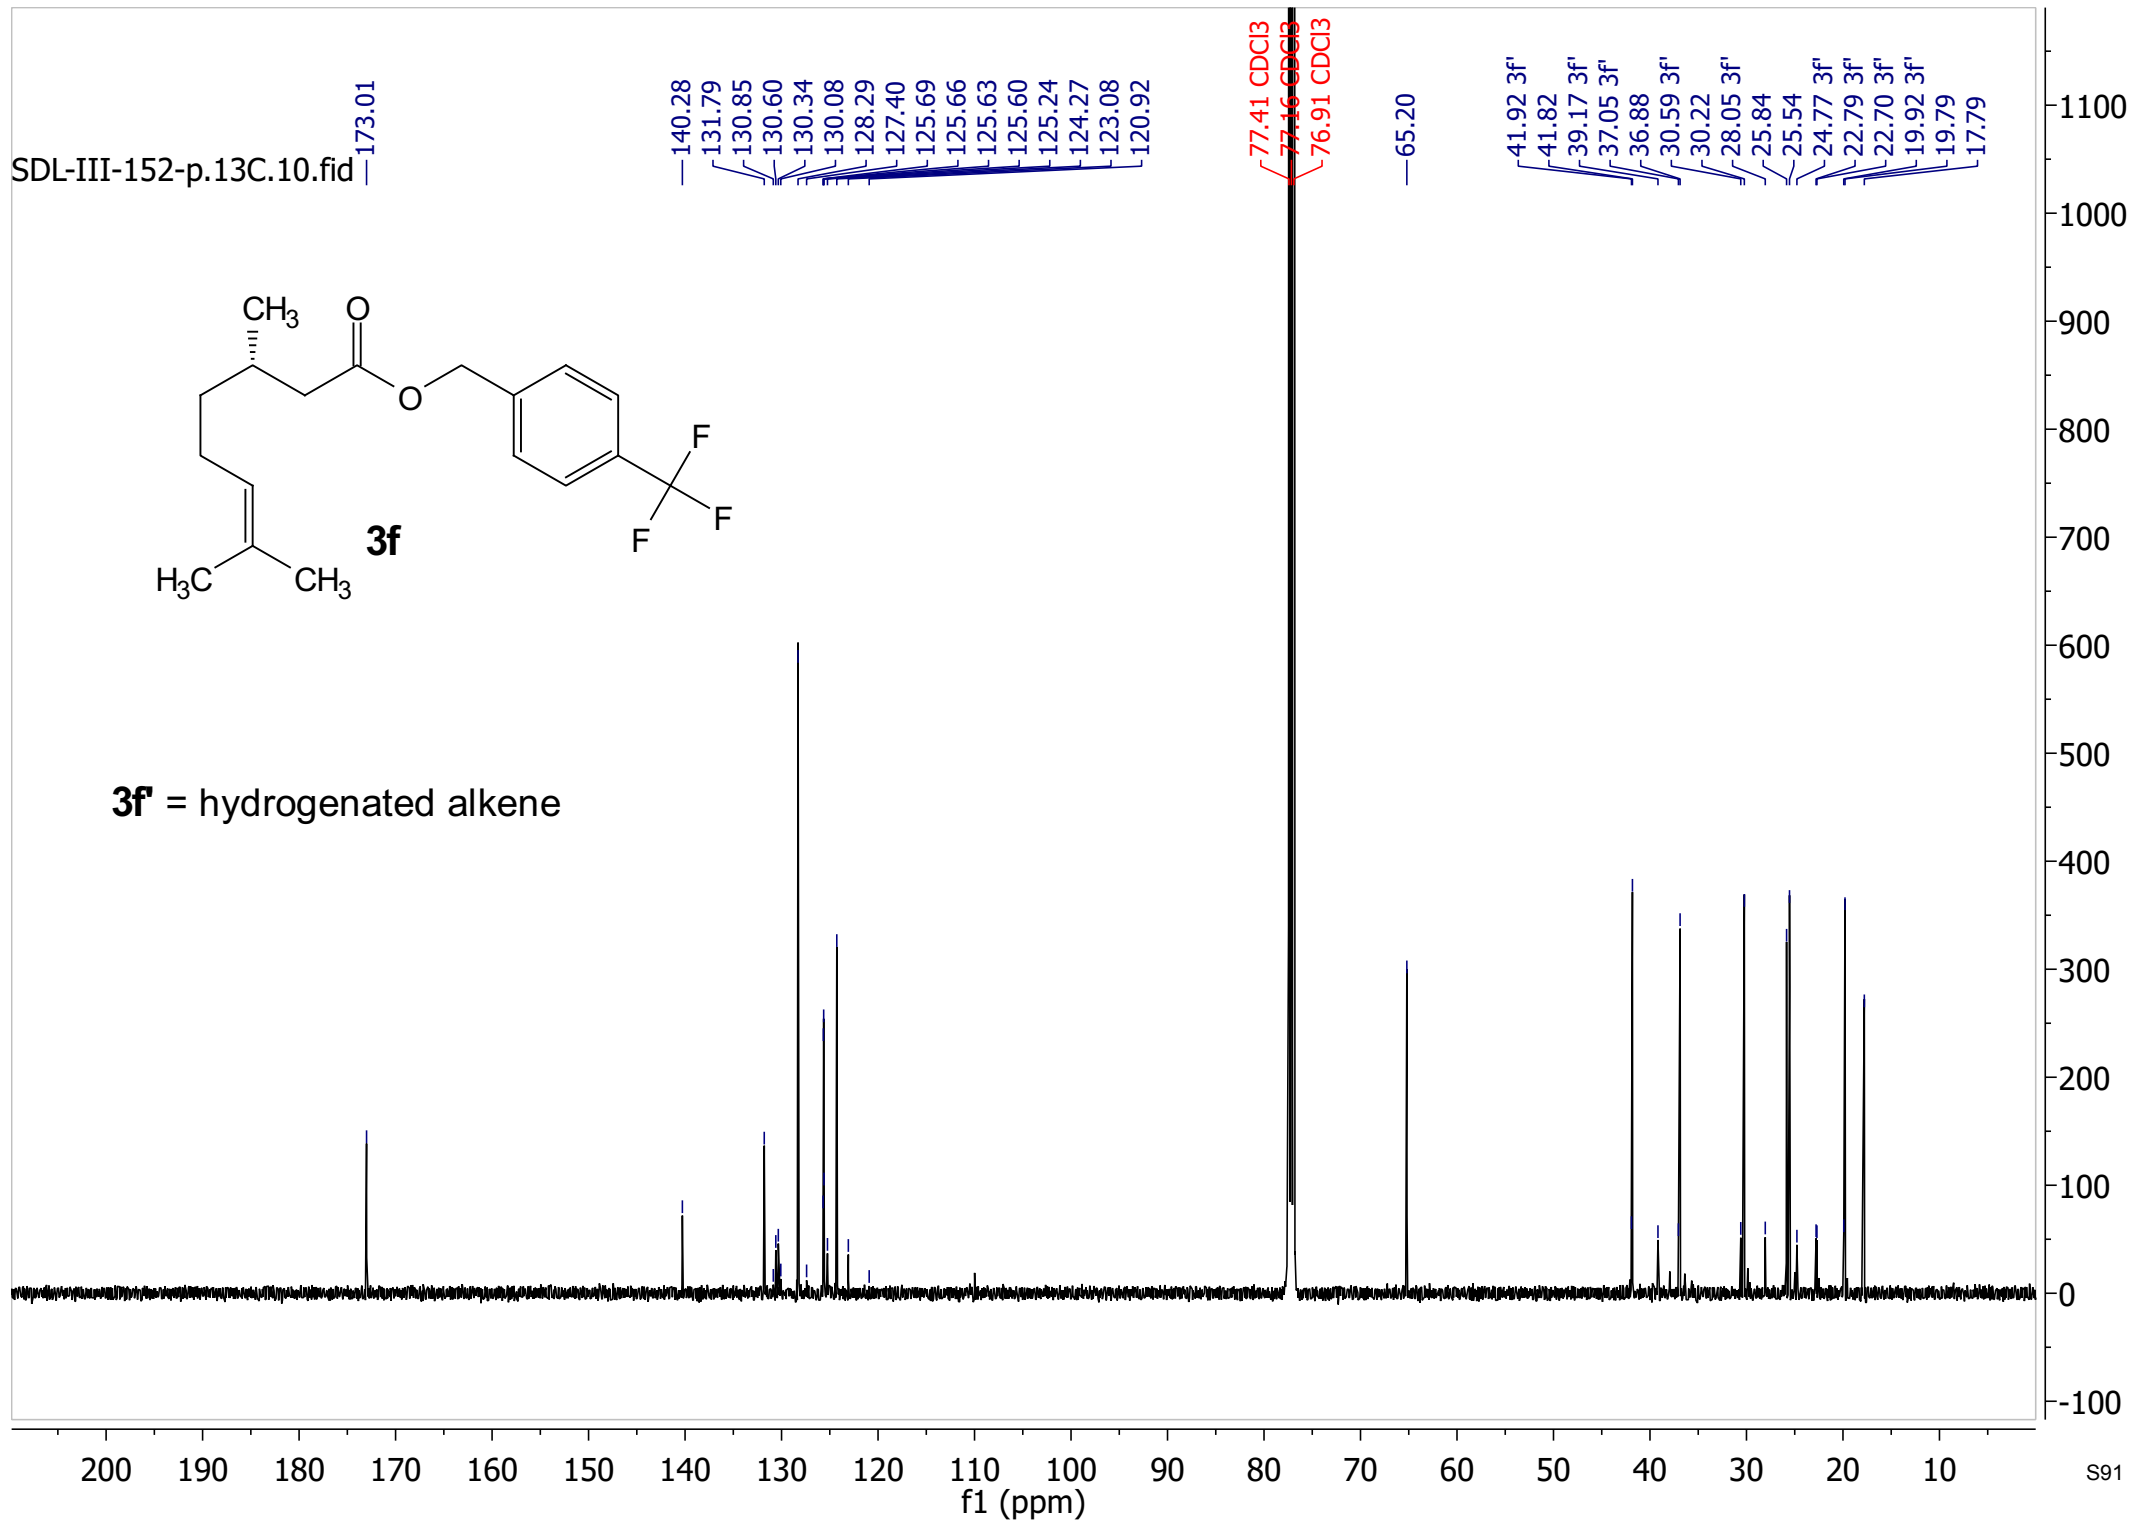

SDL-III-152.19F.10.fid

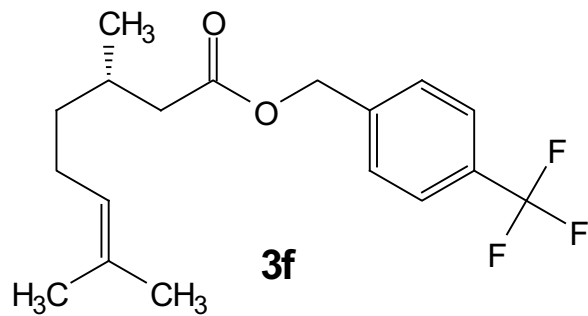

62.65

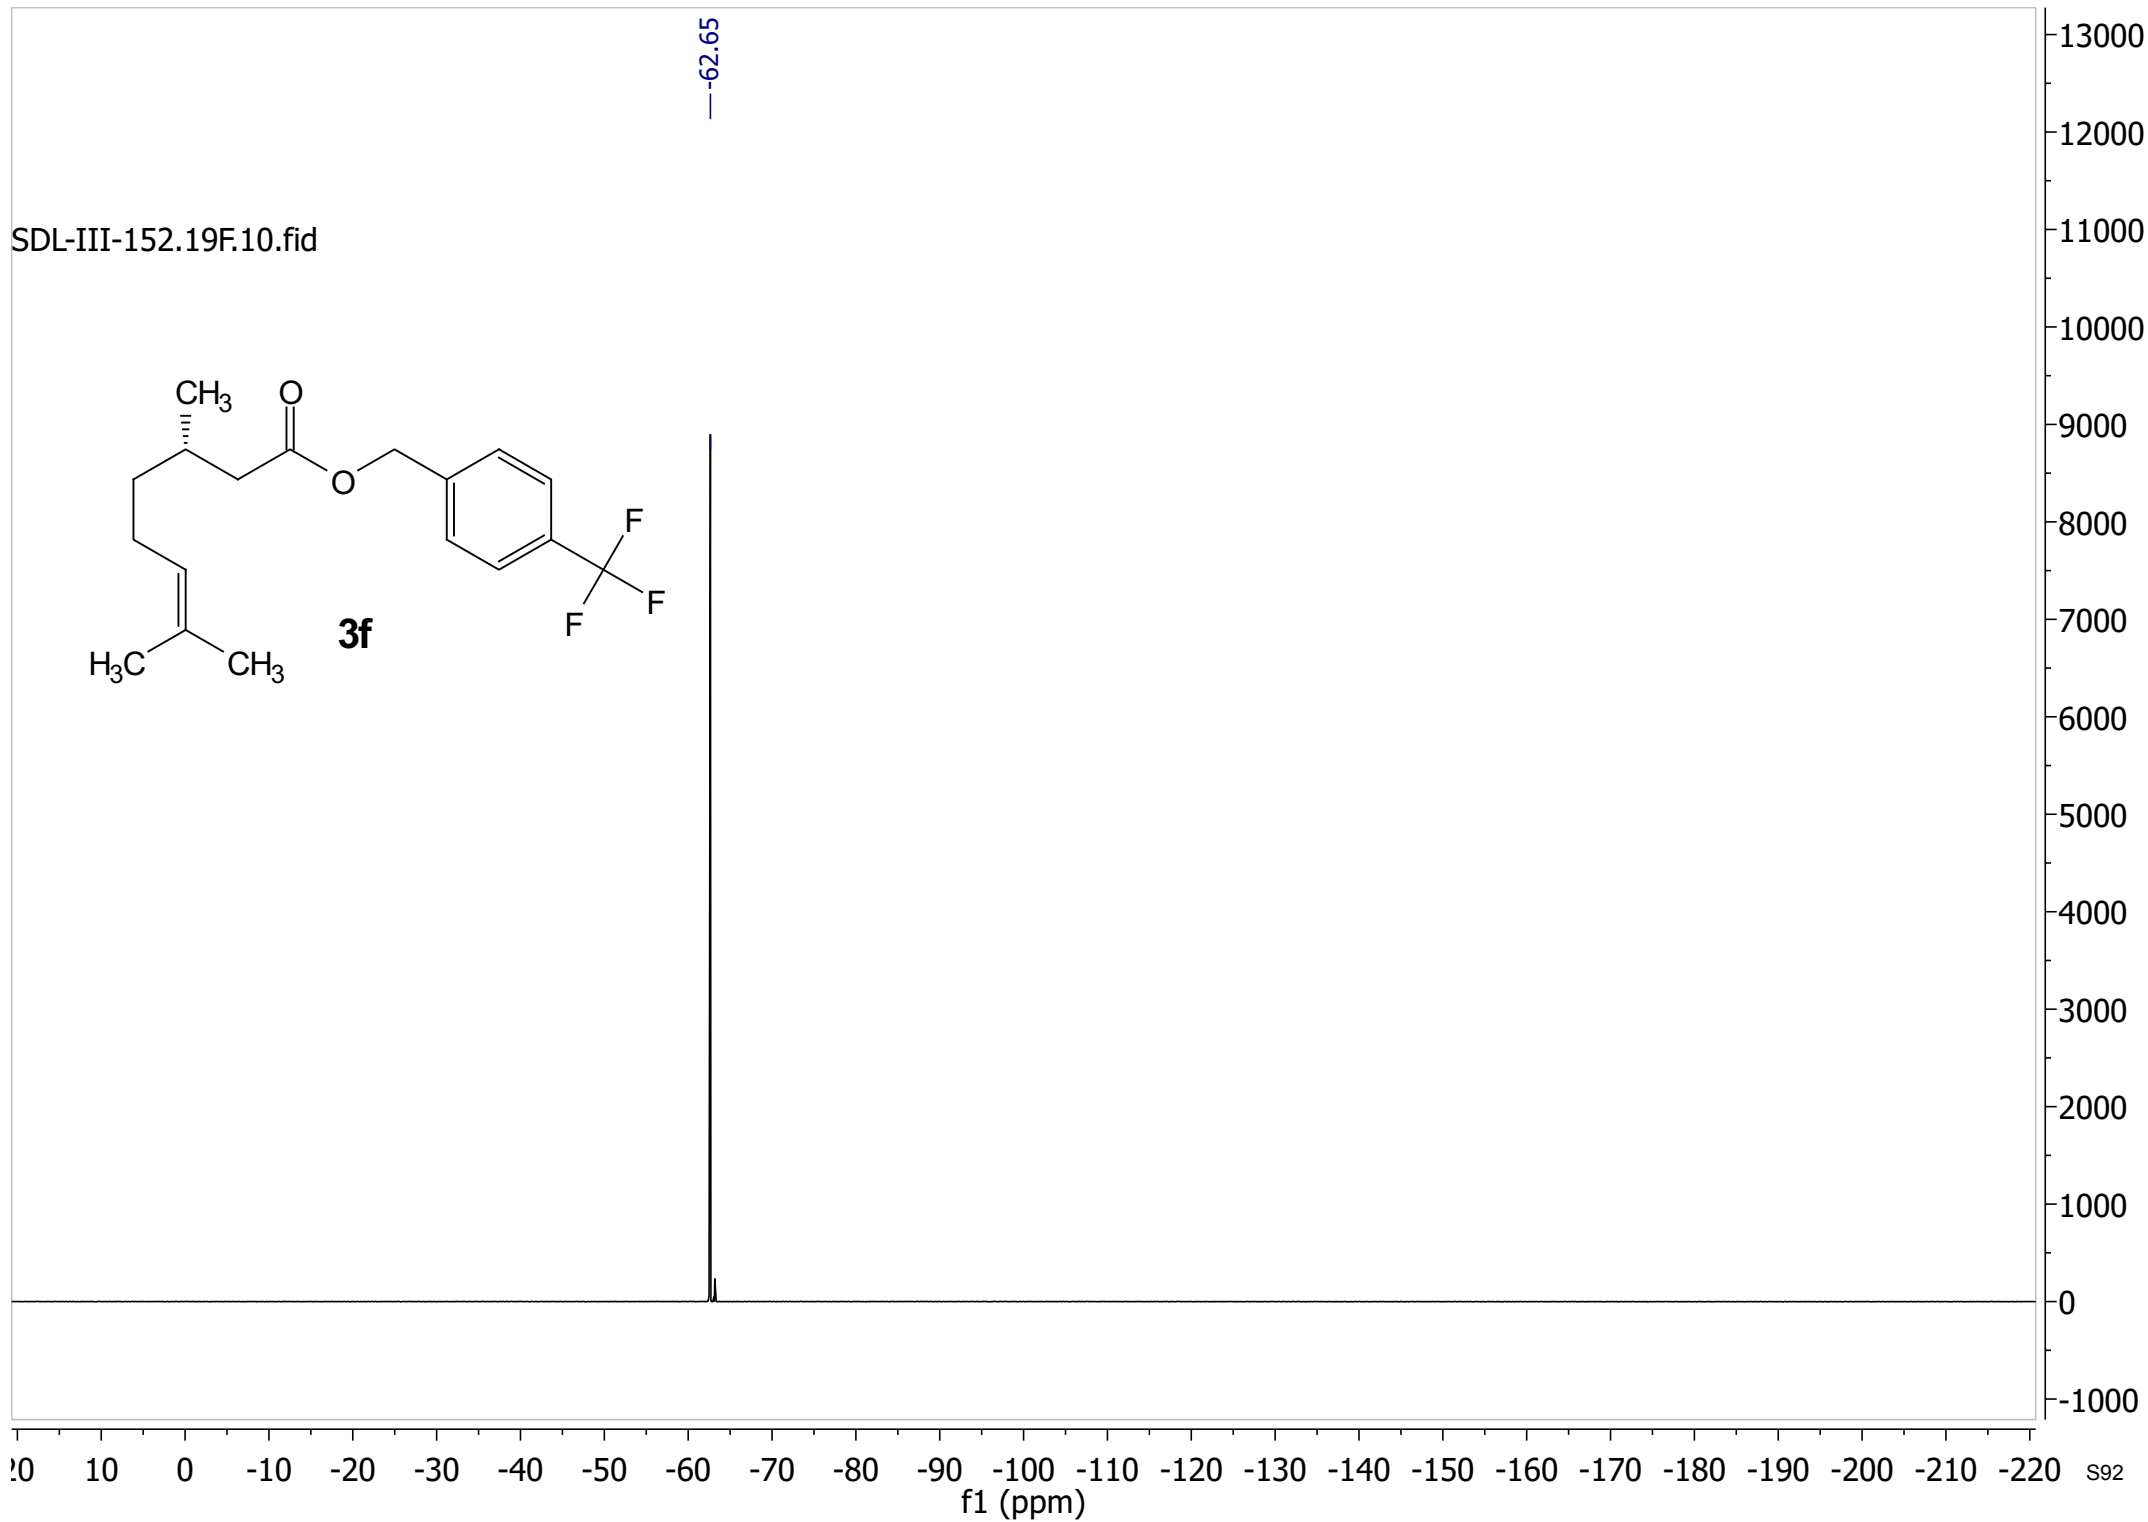

SDL-III-197A-p-clean.1H.10.fid

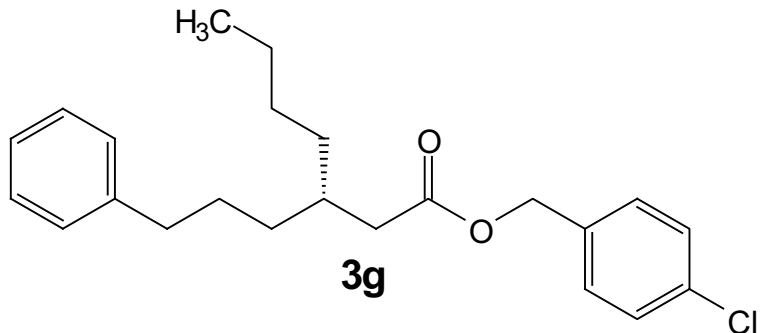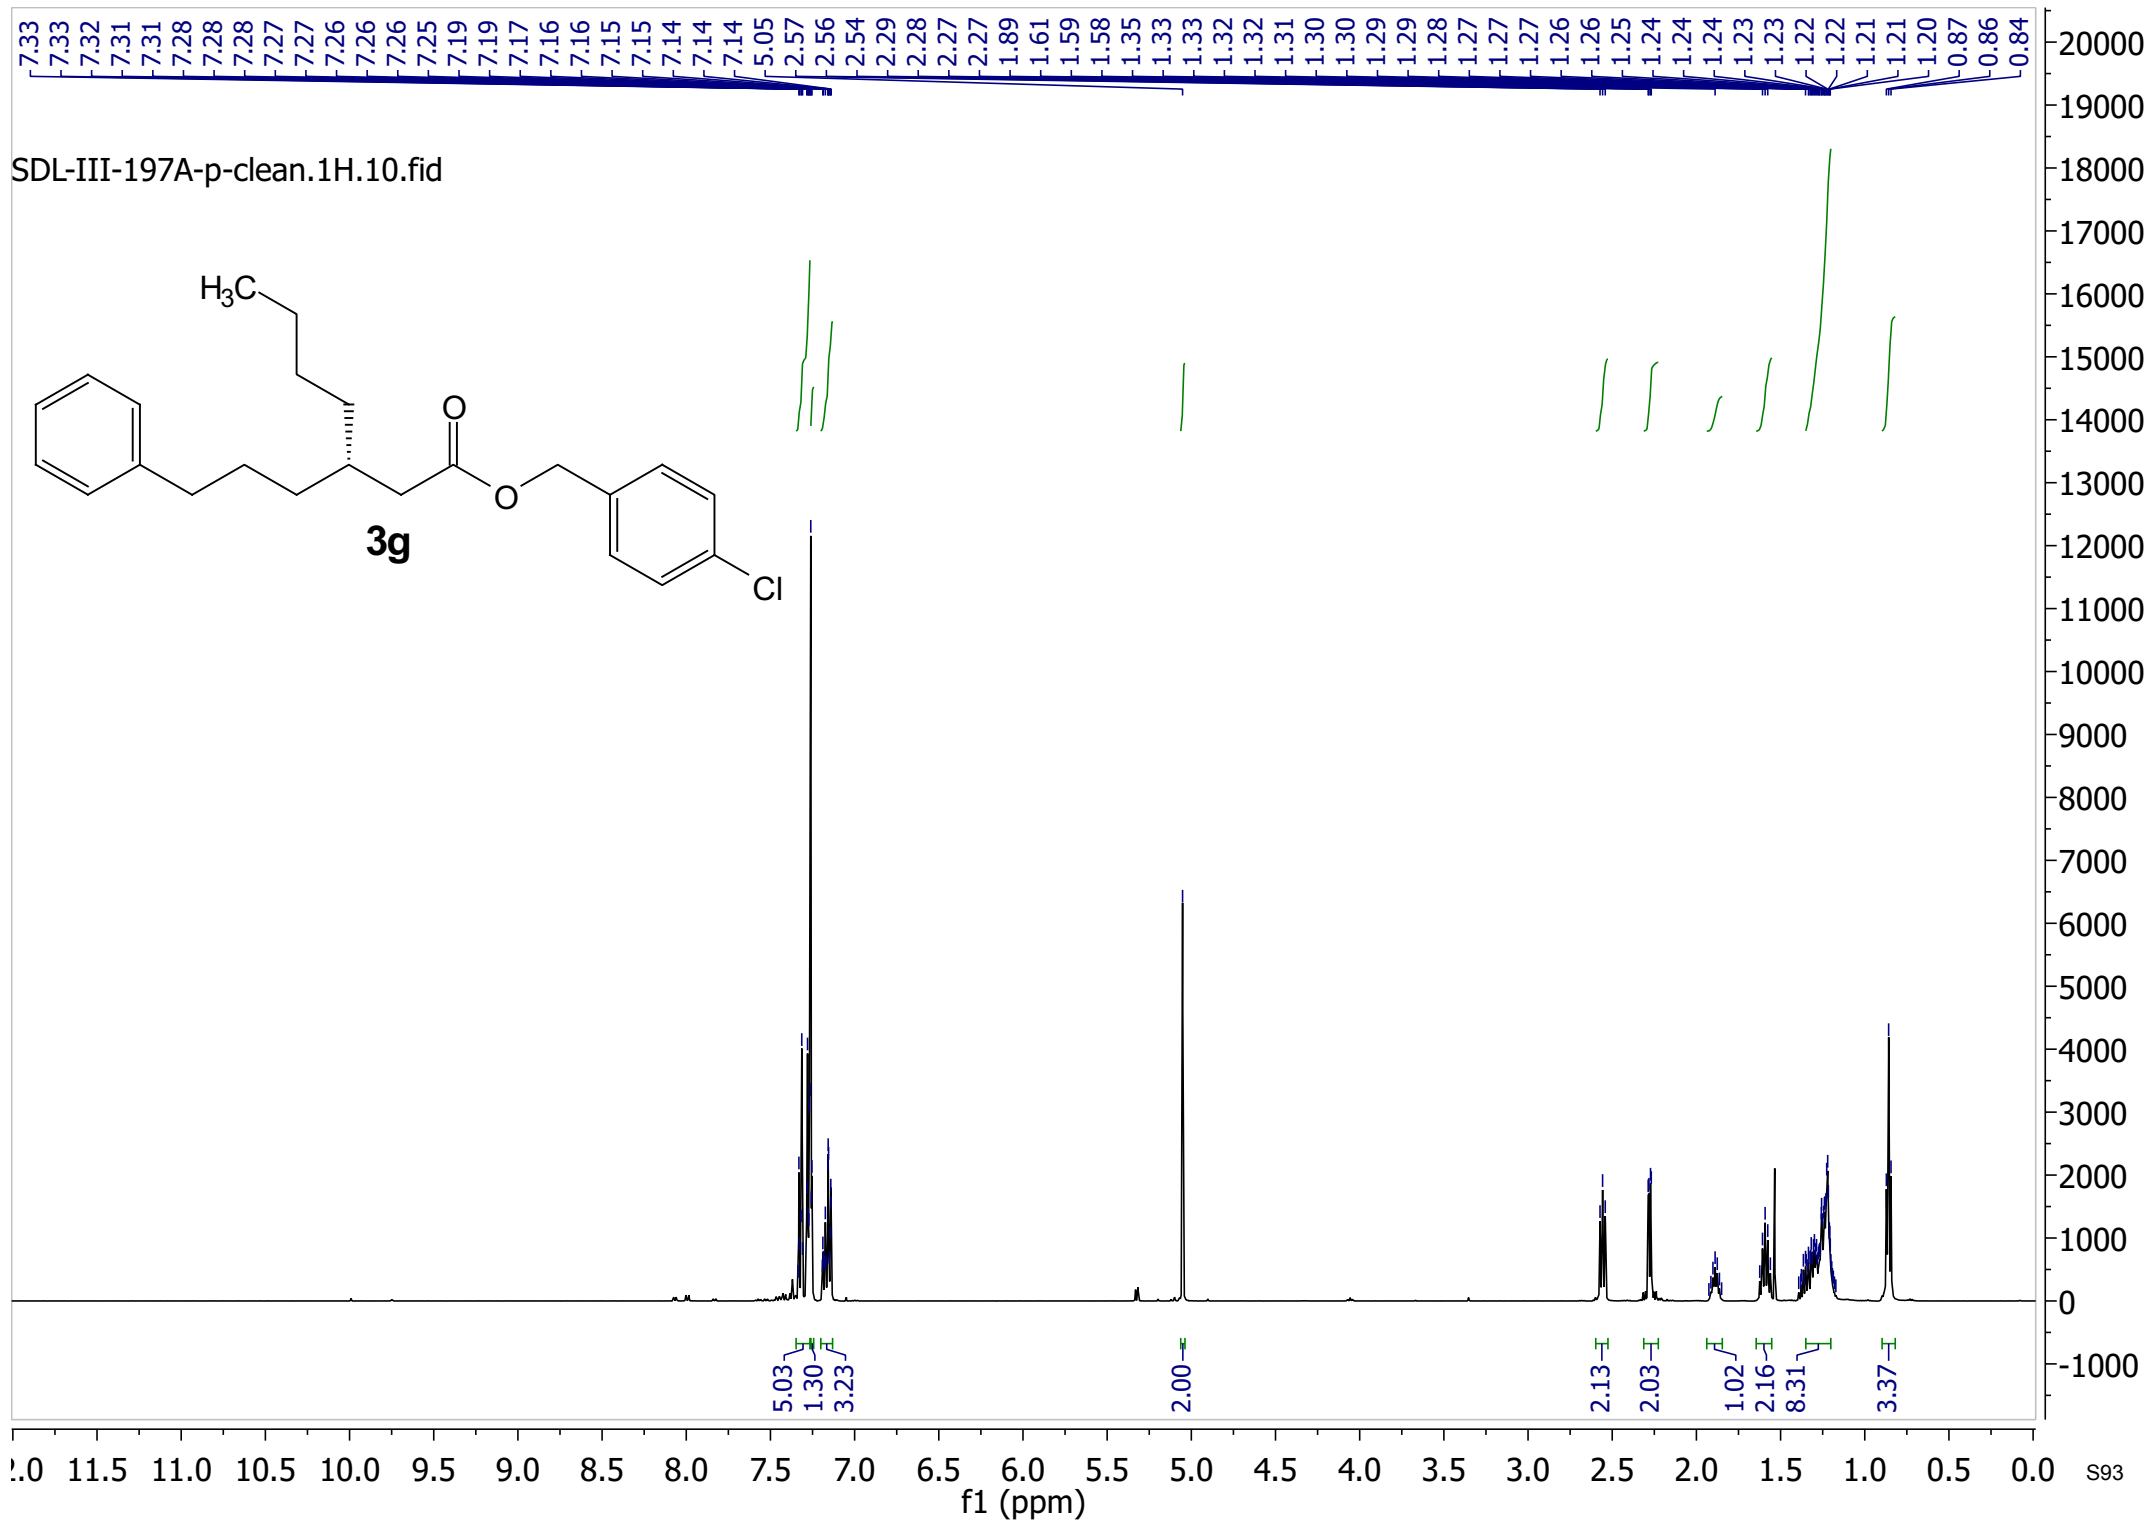

SDL-III-197A-p-clean.13C.10.fid

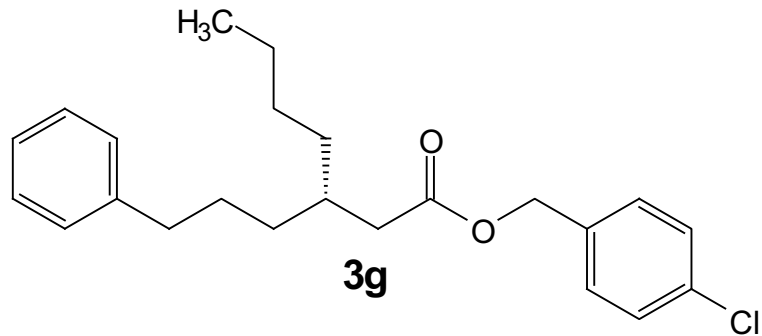

—173.36

—142.63

—134.79

—134.22

—129.82

—128.86

—128.49

—128.41

—125.84

77.41 CDCl<sub>3</sub>

77.16 CDCl<sub>3</sub>

76.91 CDCl<sub>3</sub>

—65.33

39.28

36.27

35.16

33.70

33.66

28.86

28.59

23.03

—14.19

230 220 210 200 190 180 170 160 150 140 130 120 110 100 90 80 70 60 50 40 30 20 10 0 -10

f1 (ppm)

SDL-II-145-p.1H.10.fid

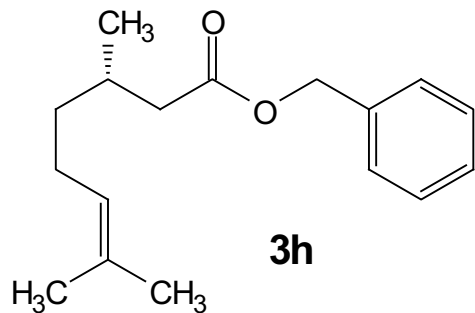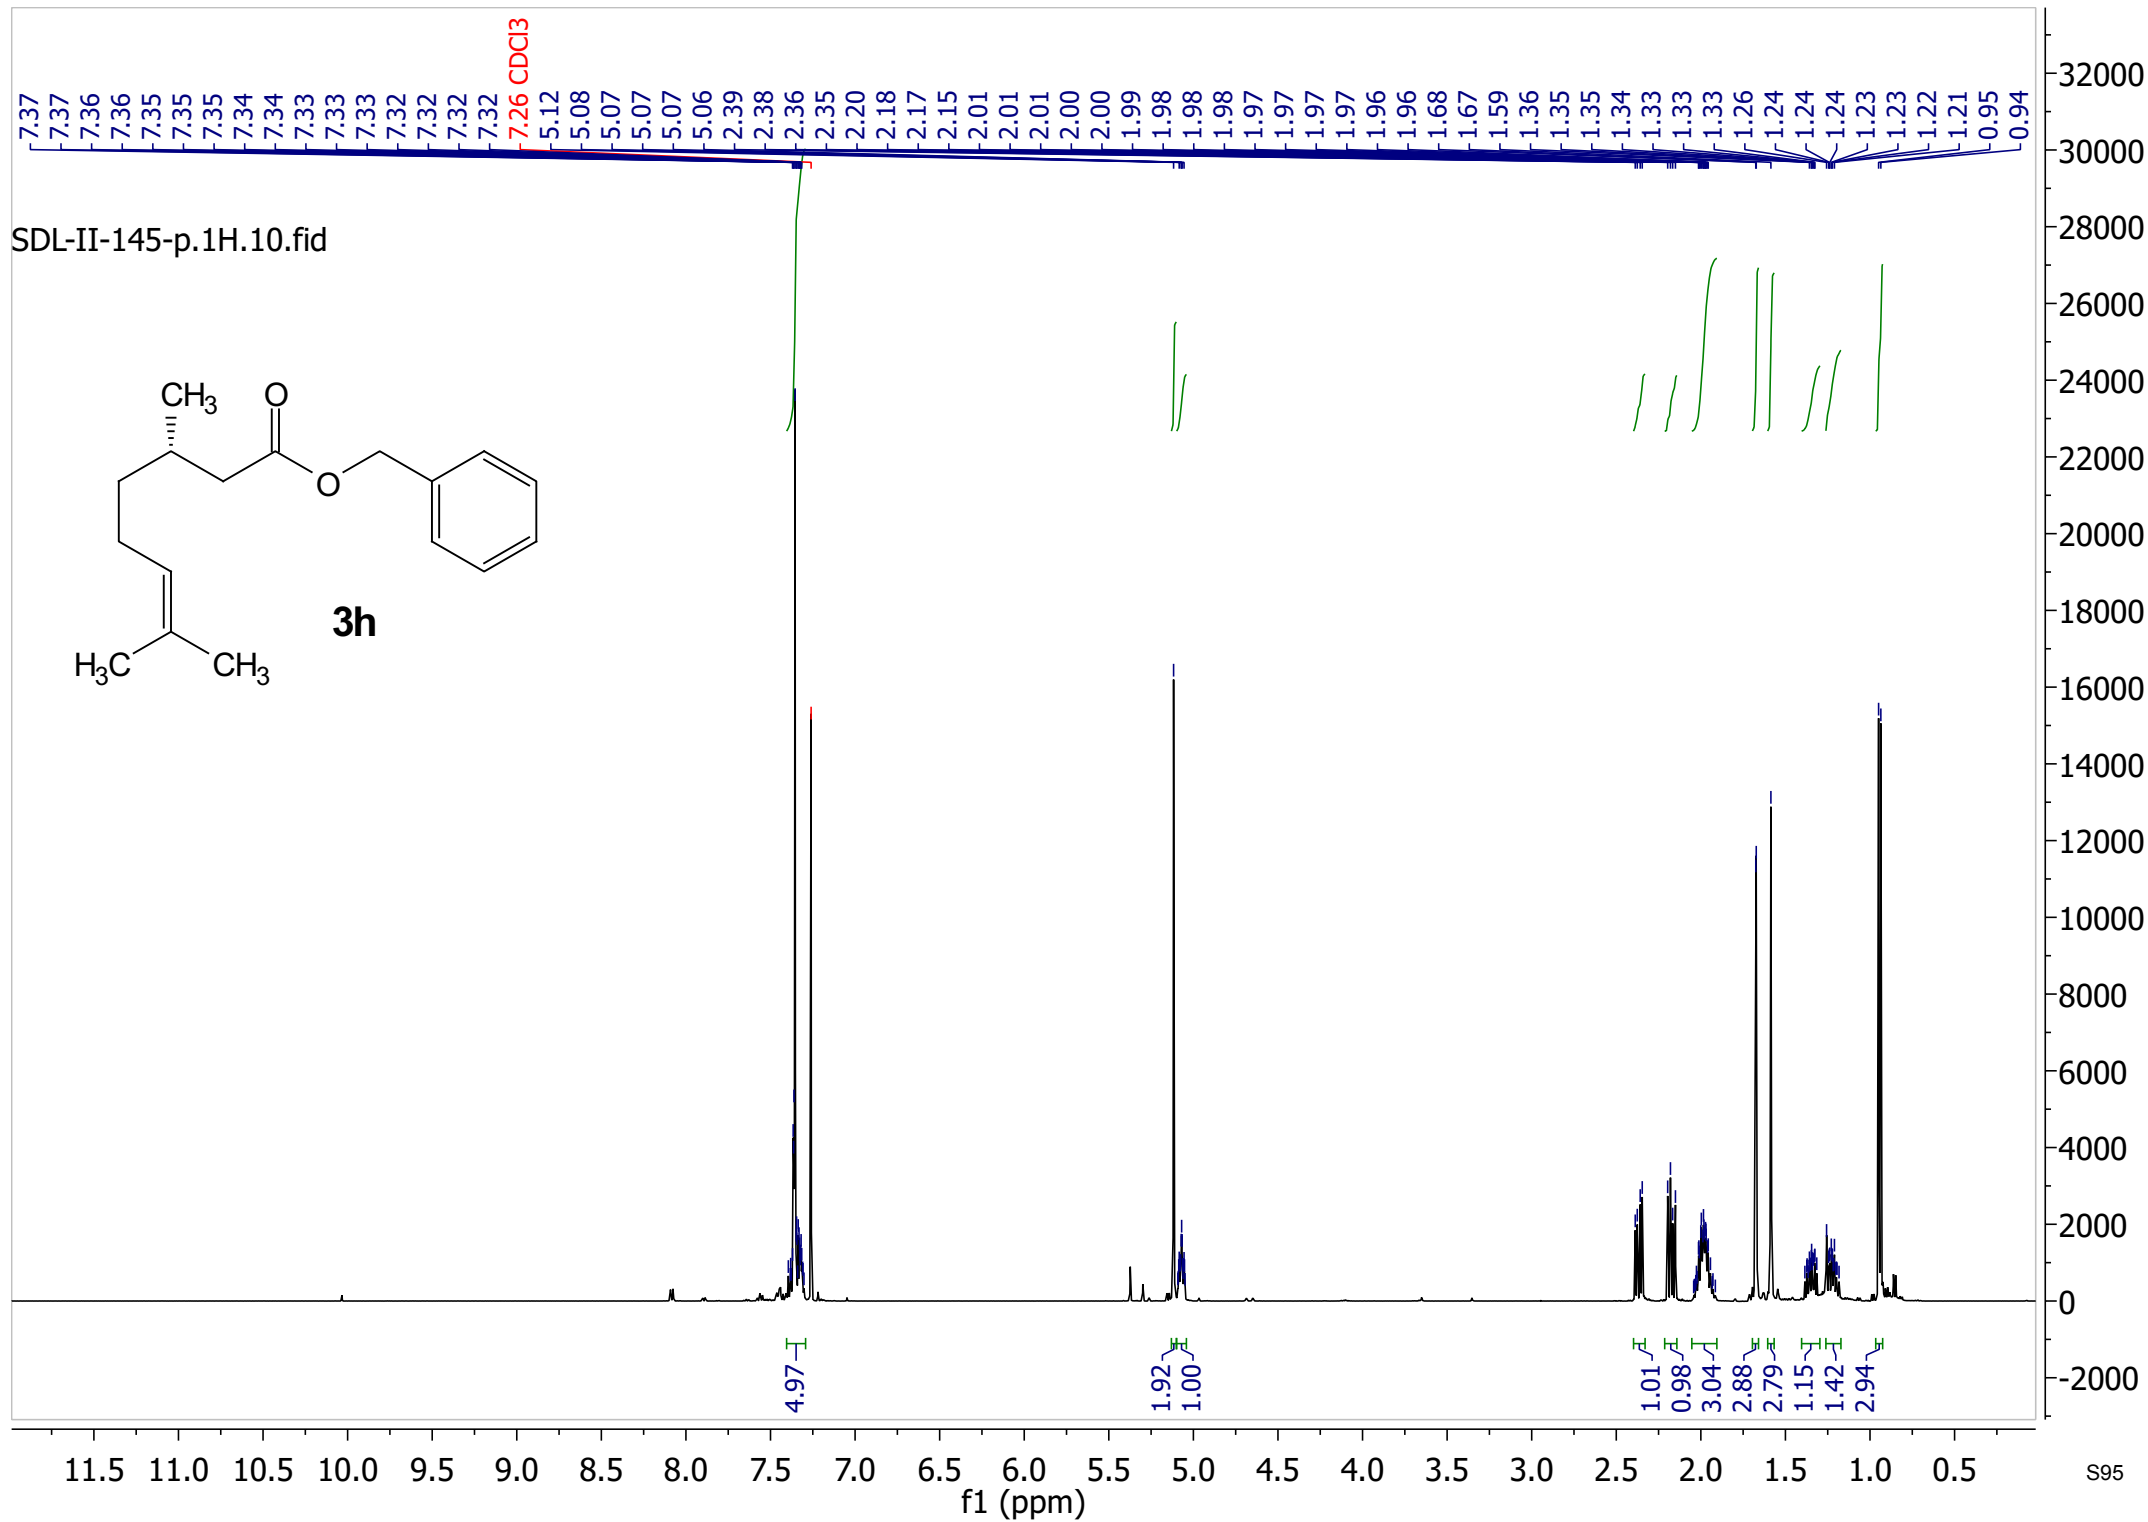

SDL-II-145-p.13C.10.fid

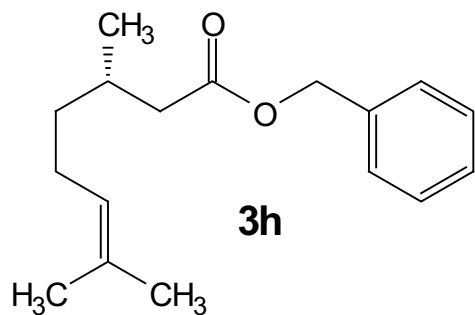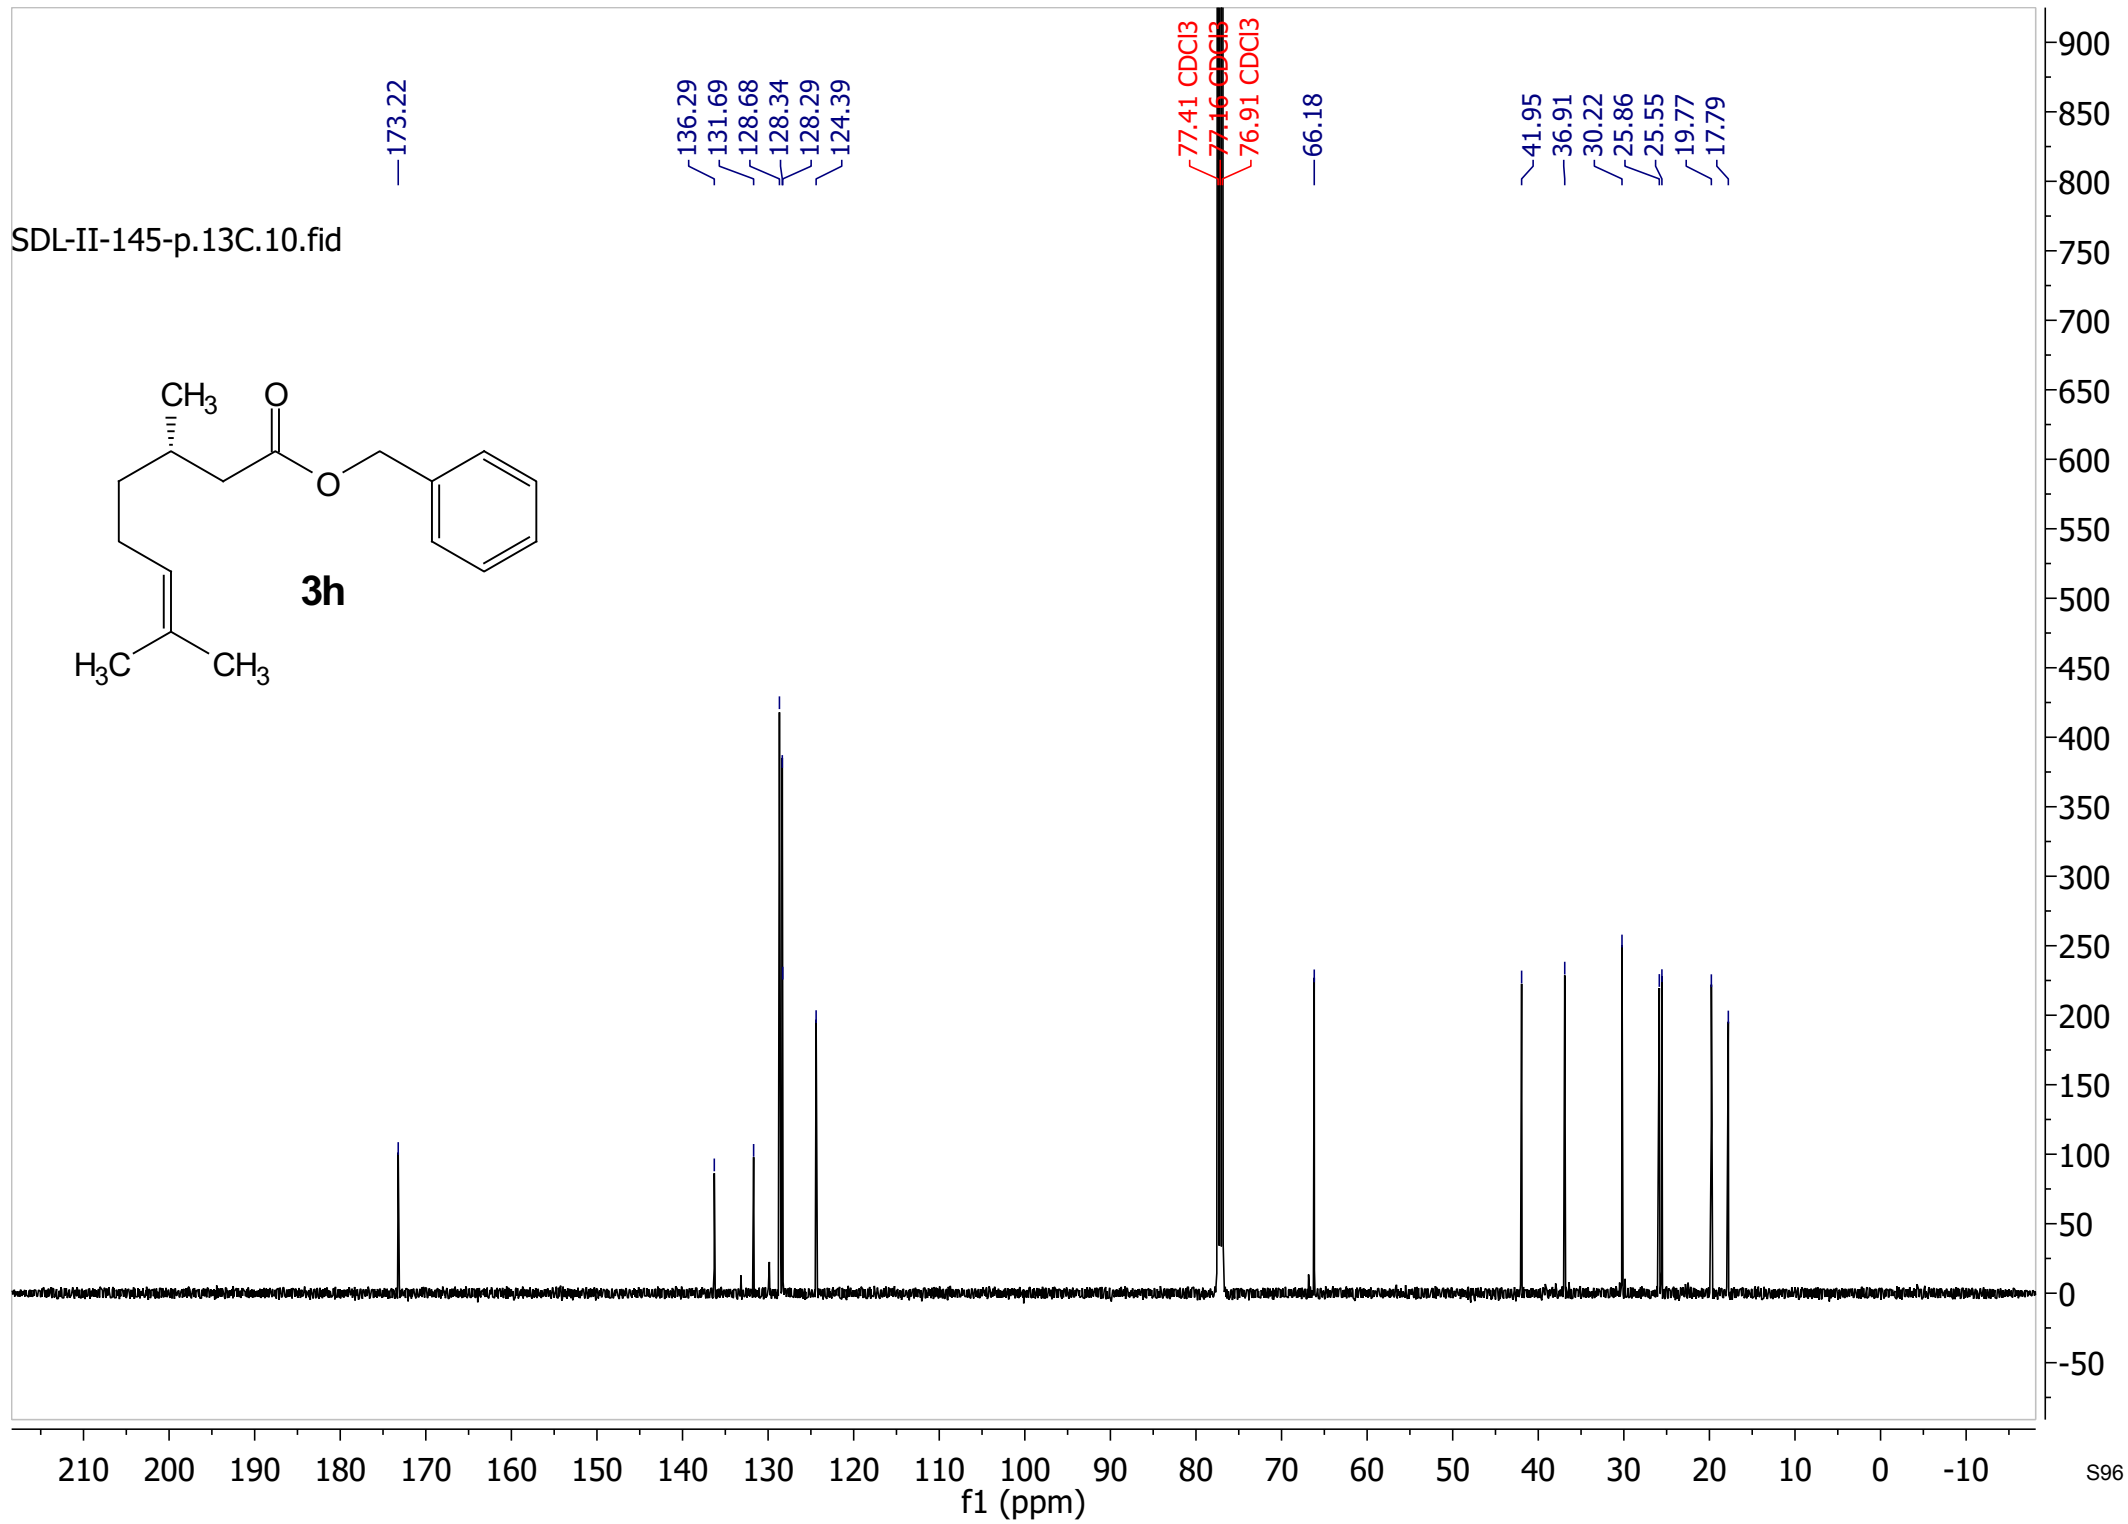



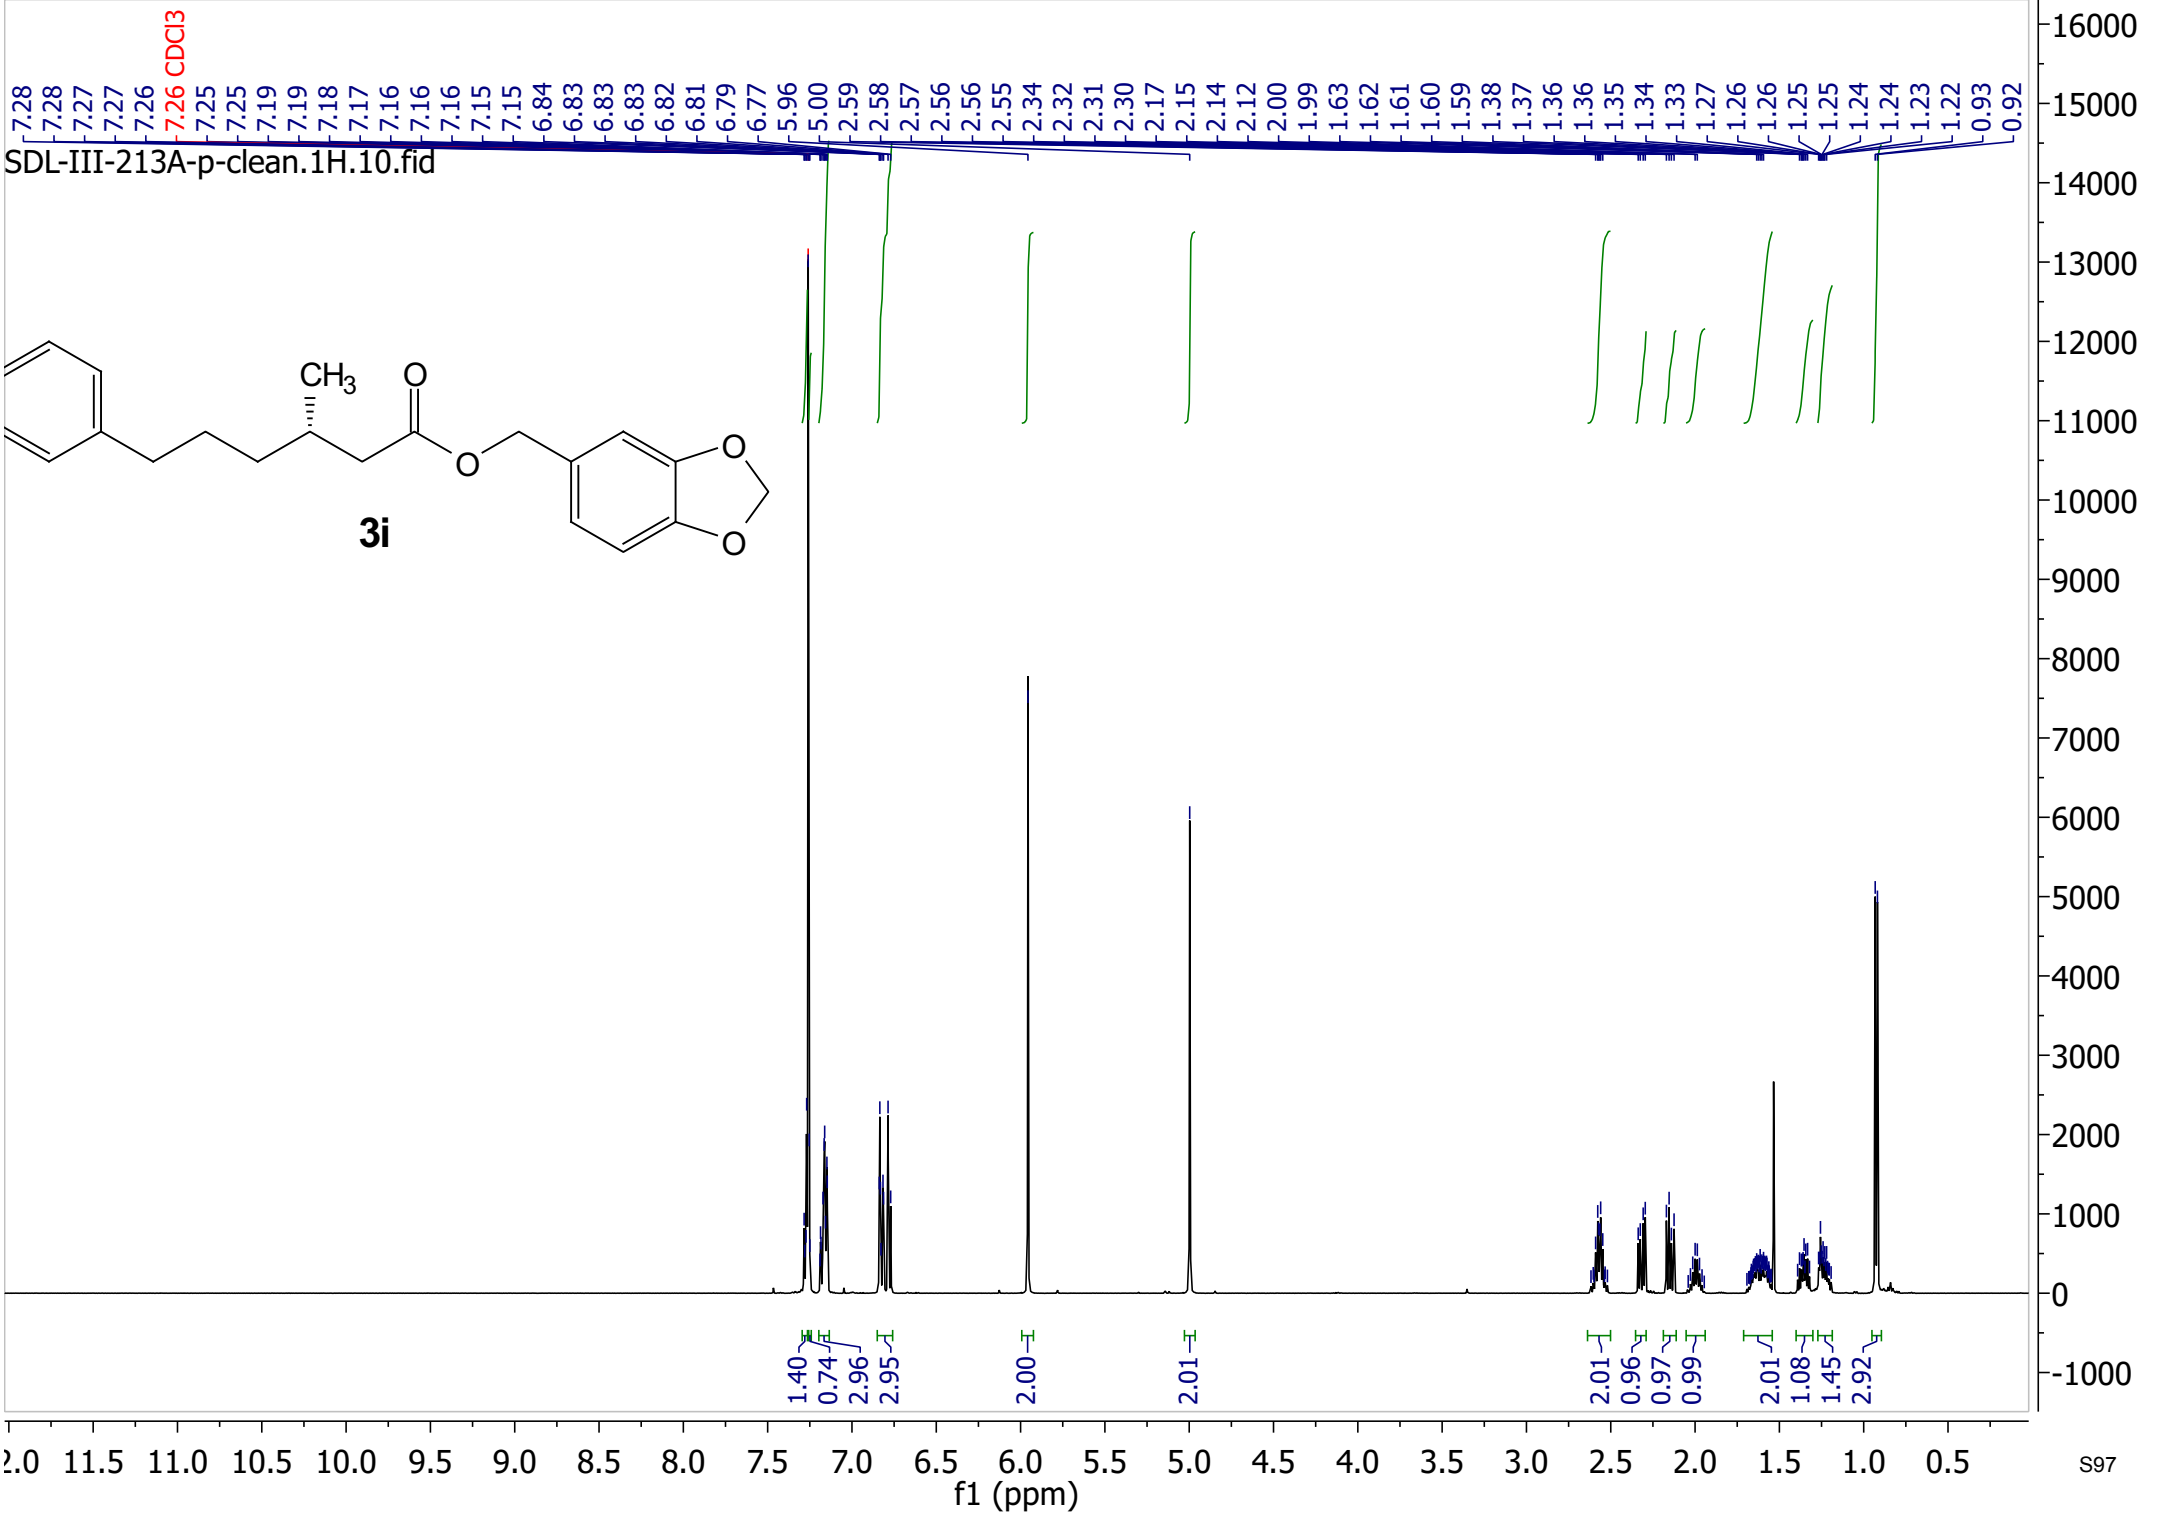

SDL-III-213A-p-clean.13C.10.fid

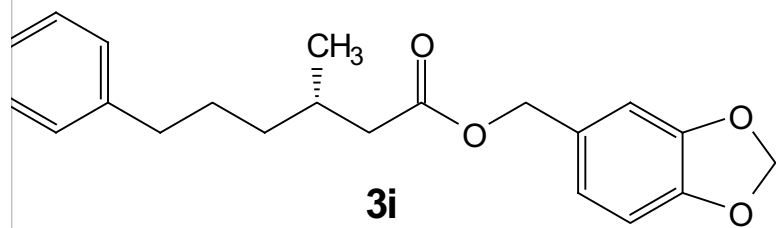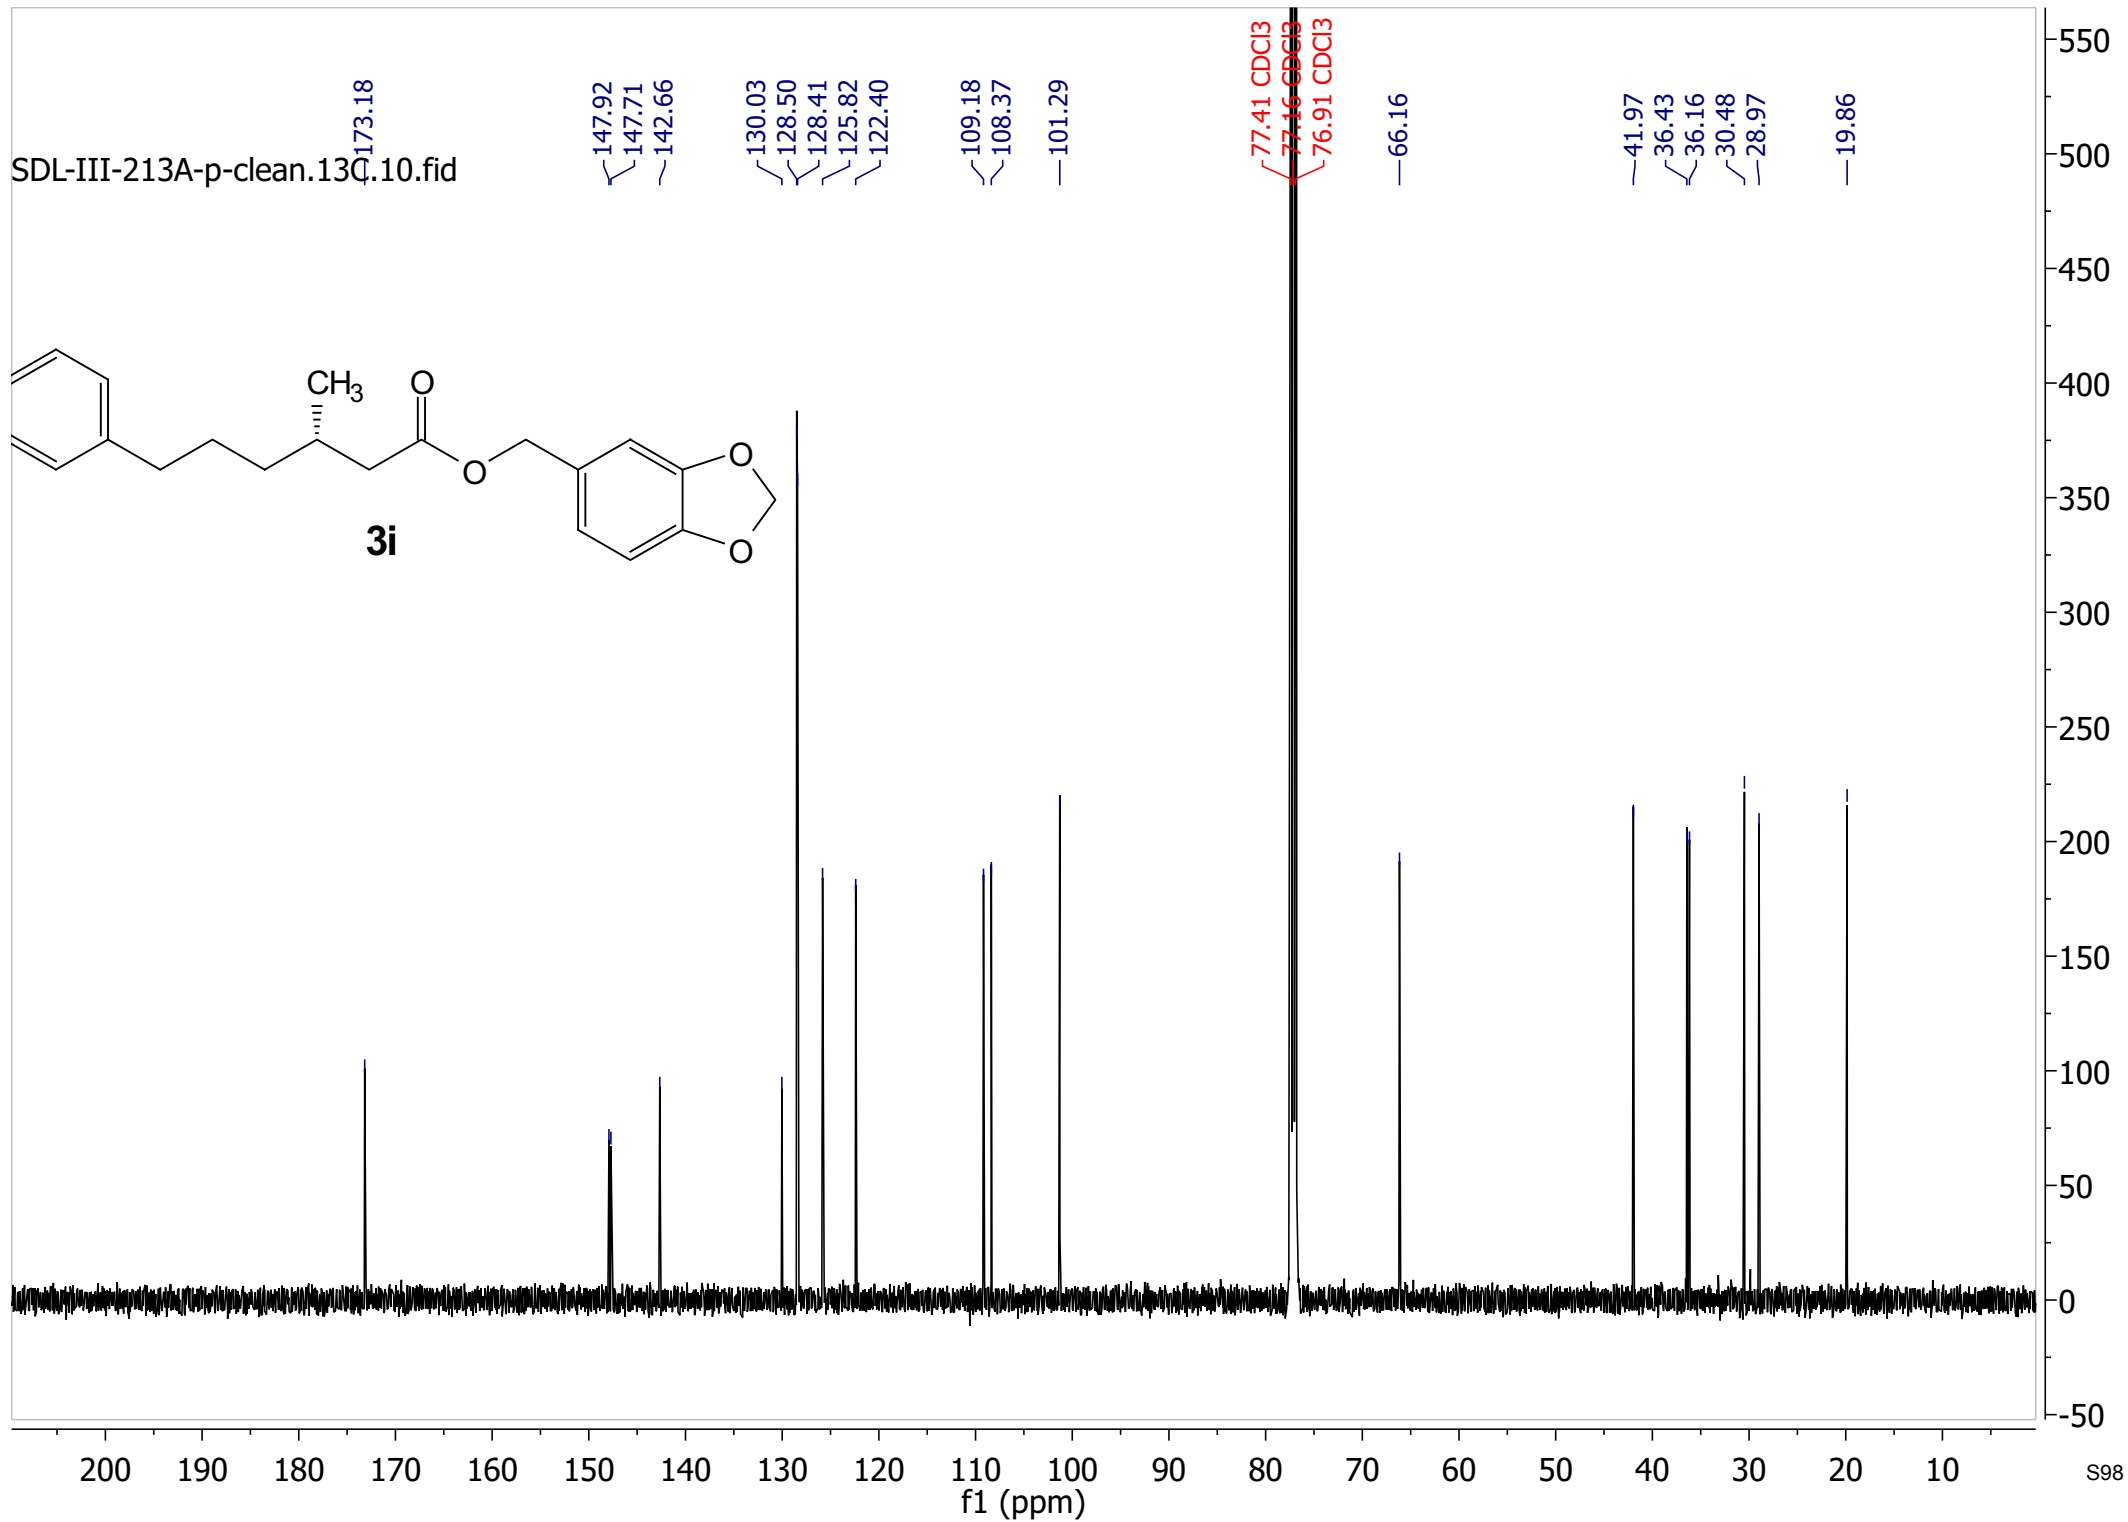

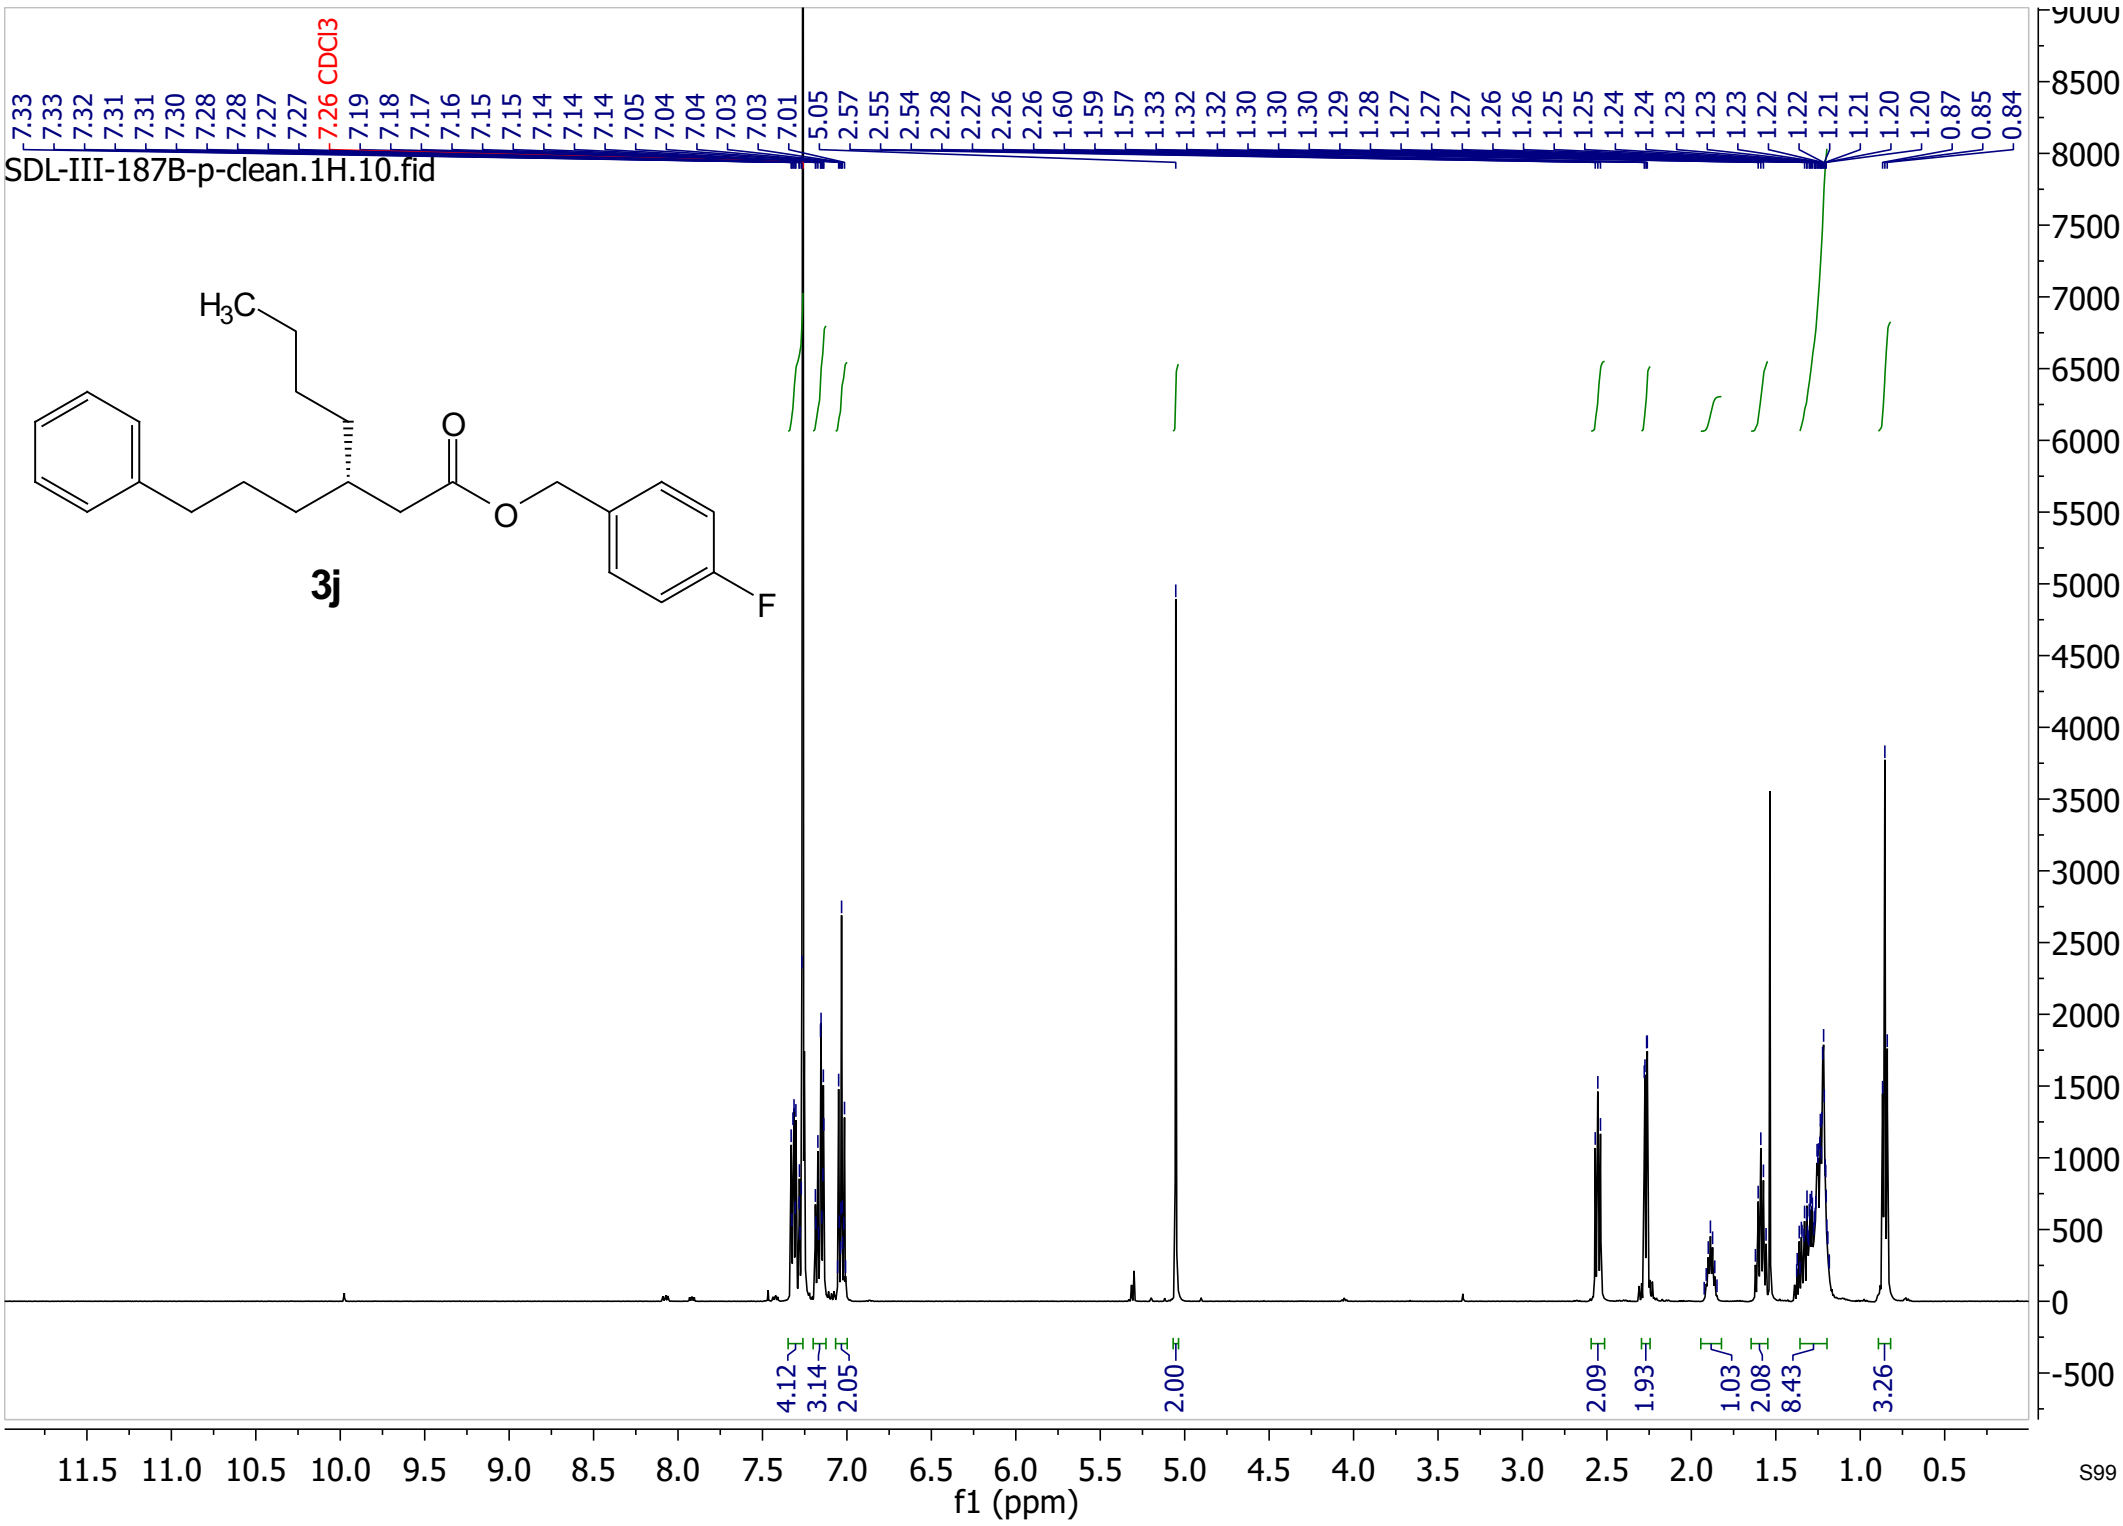

SDL-III-187B-p-clean.13C.10.fid

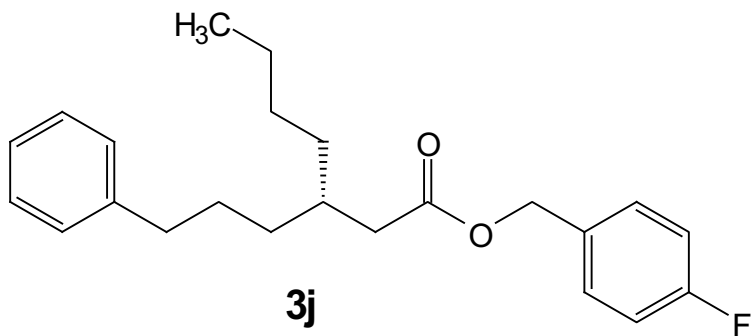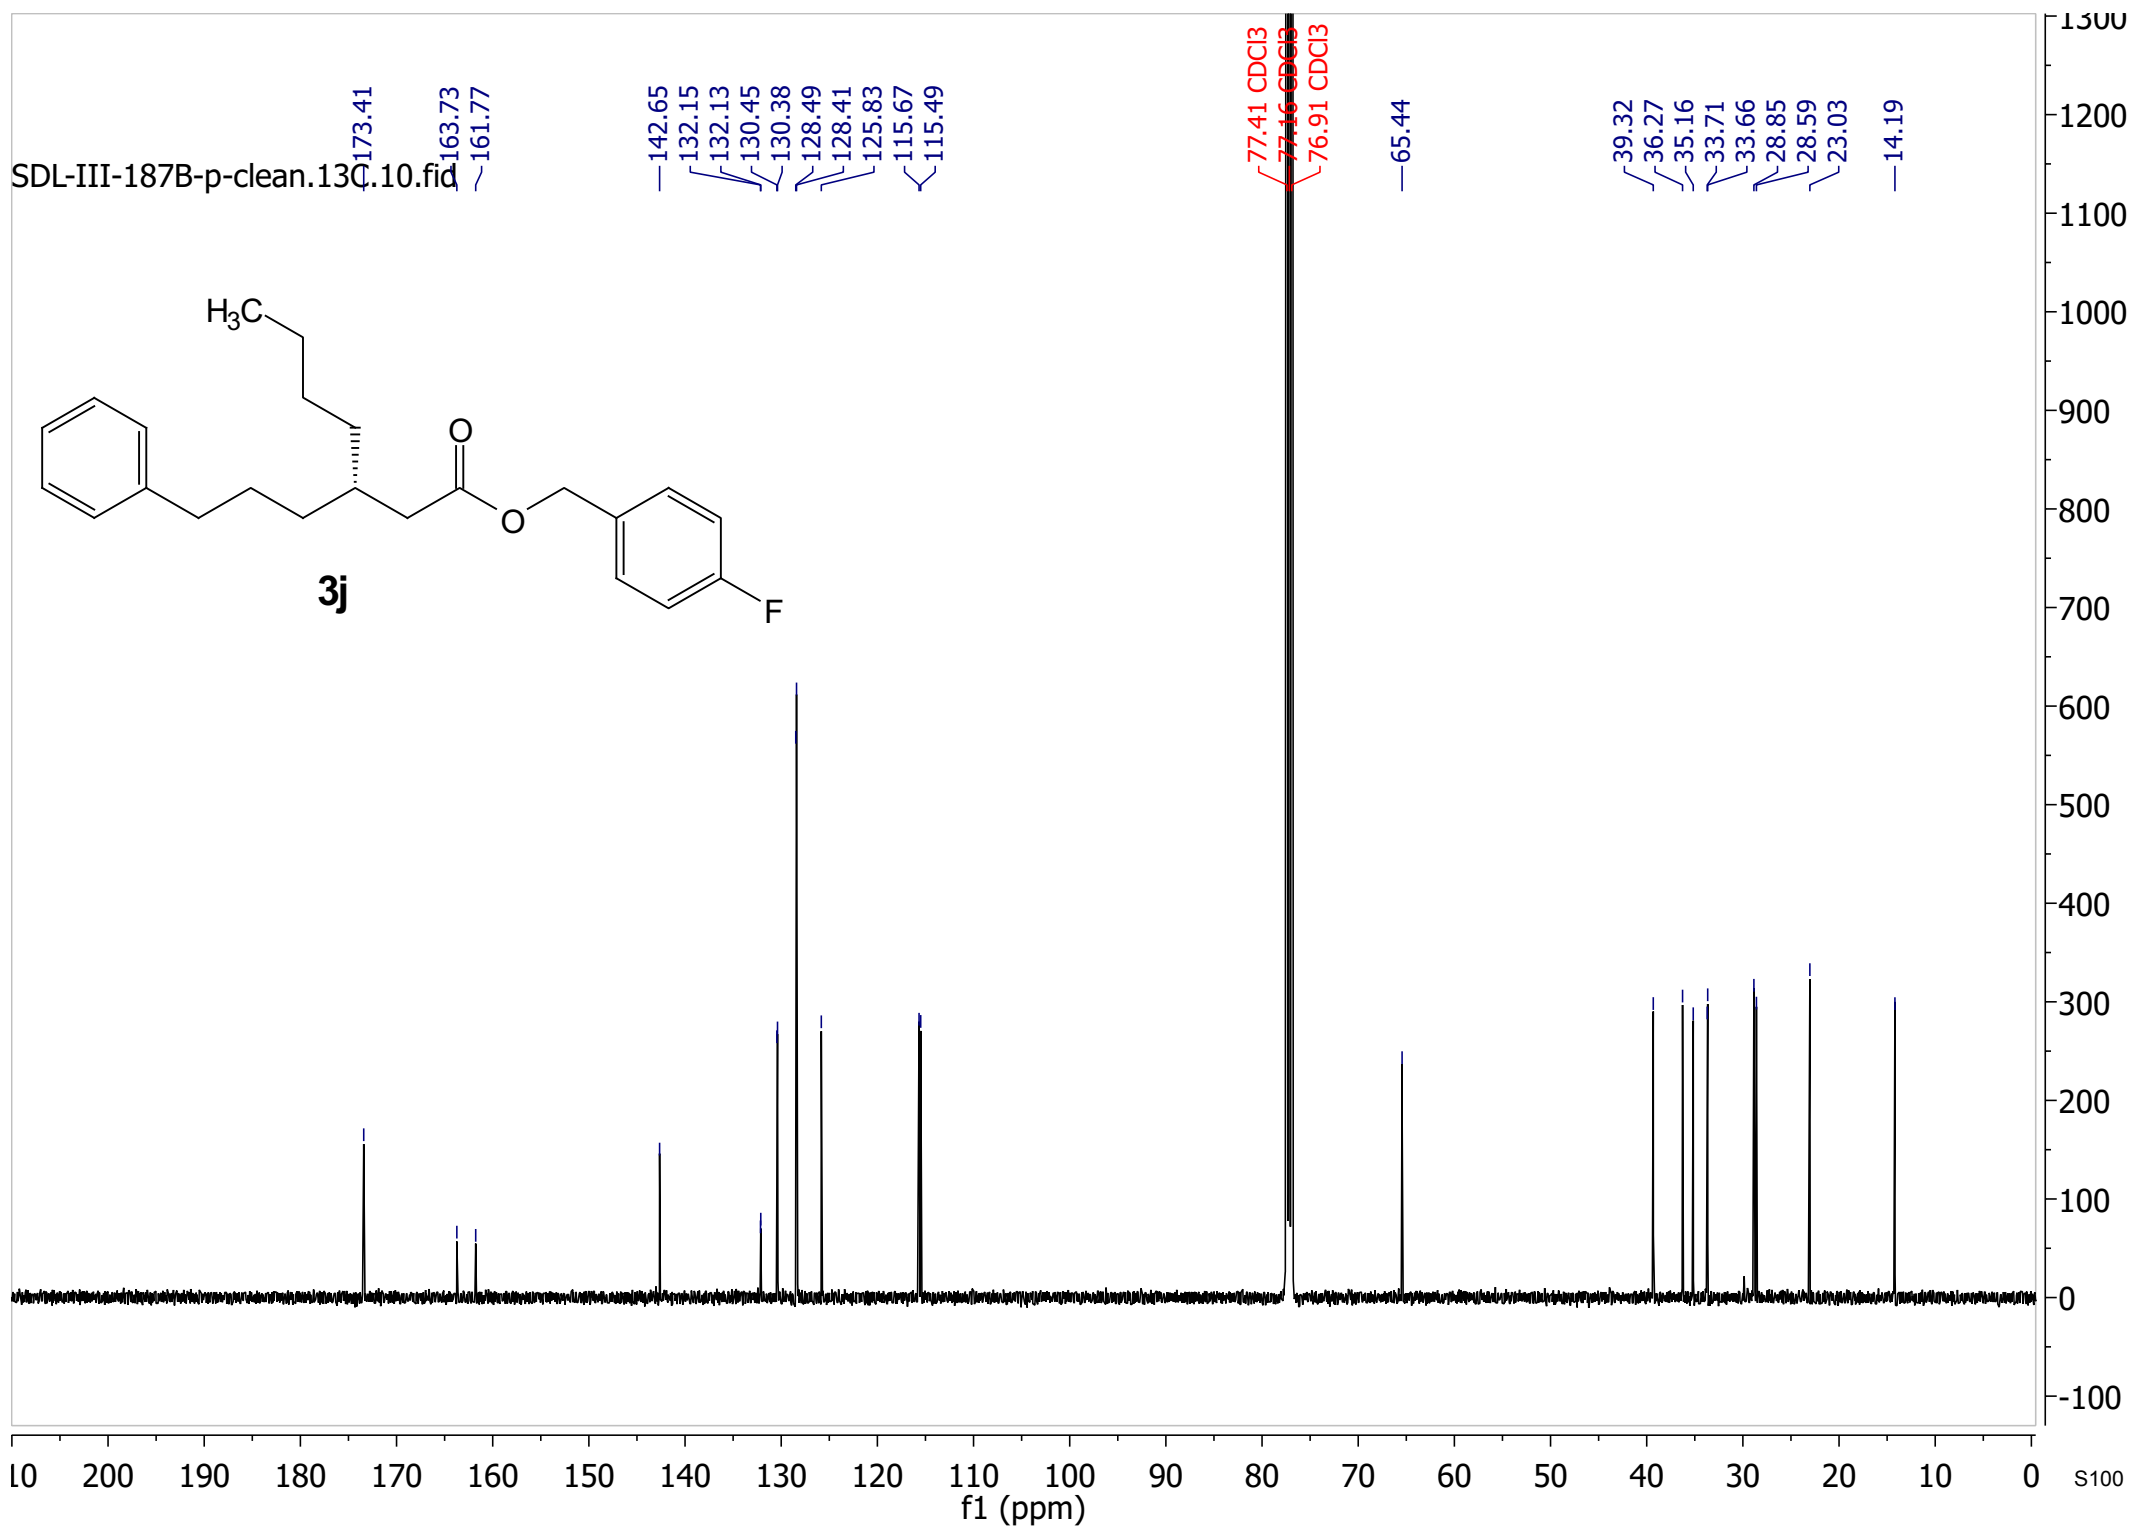

SDL-III-187B-clean.19F.10.fid

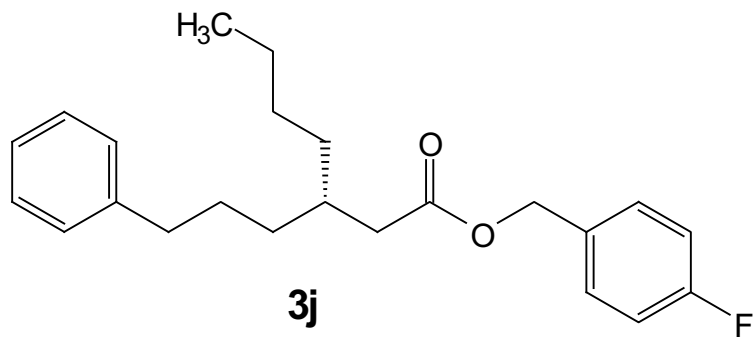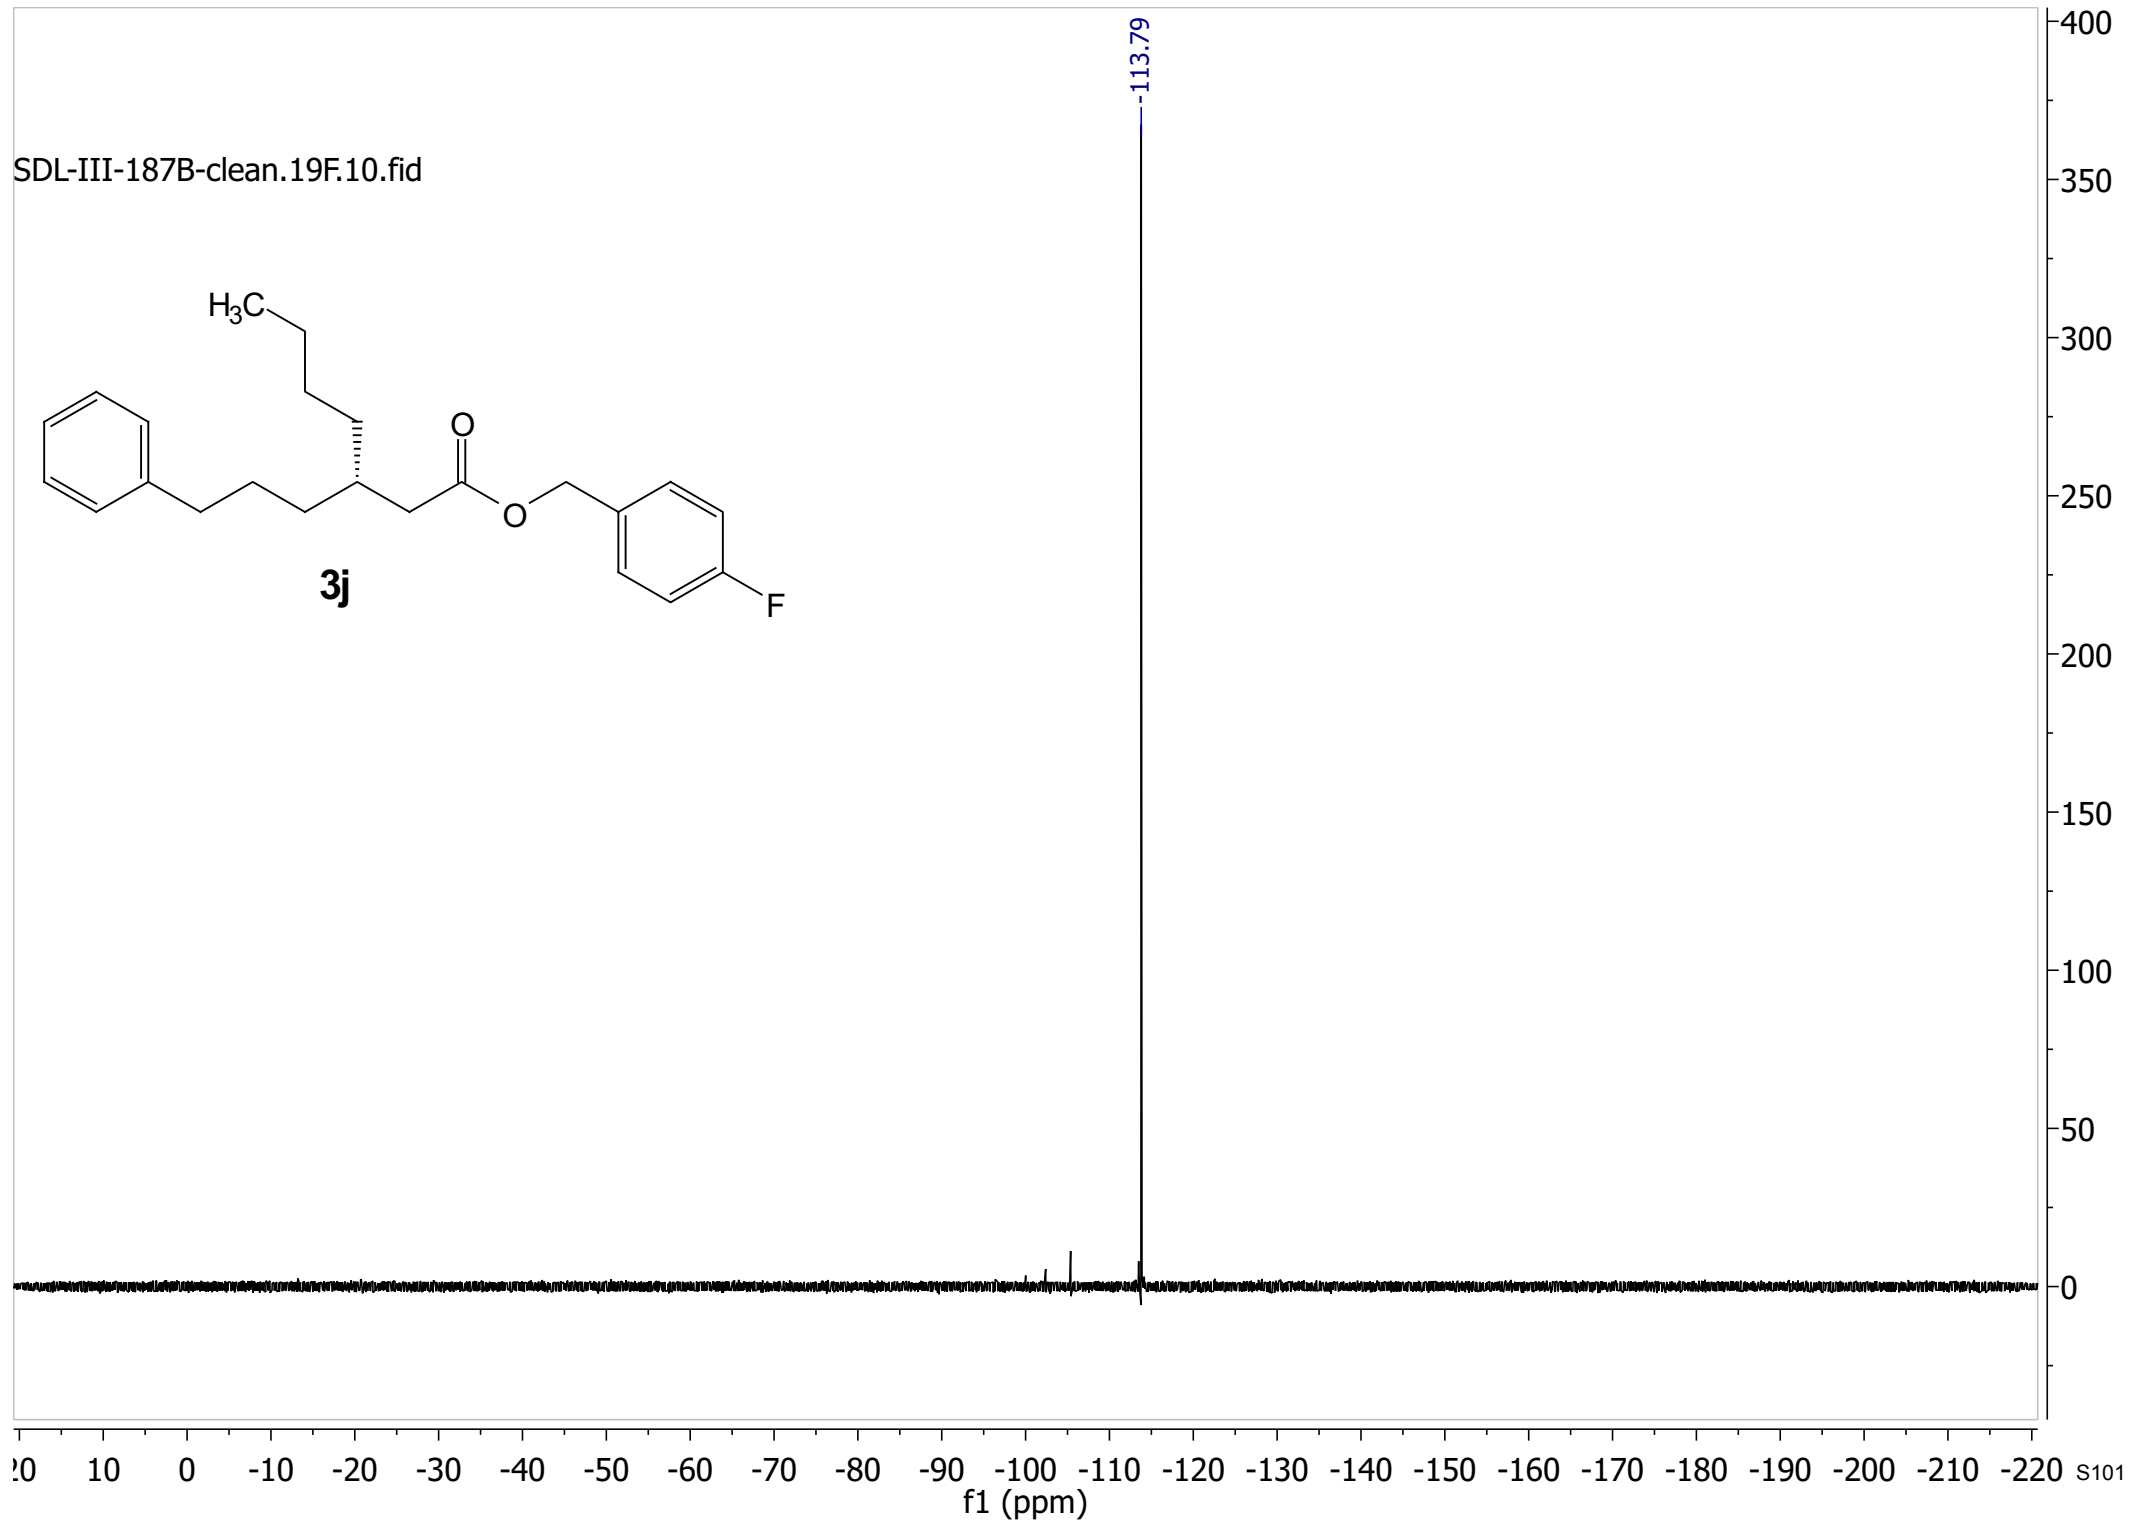

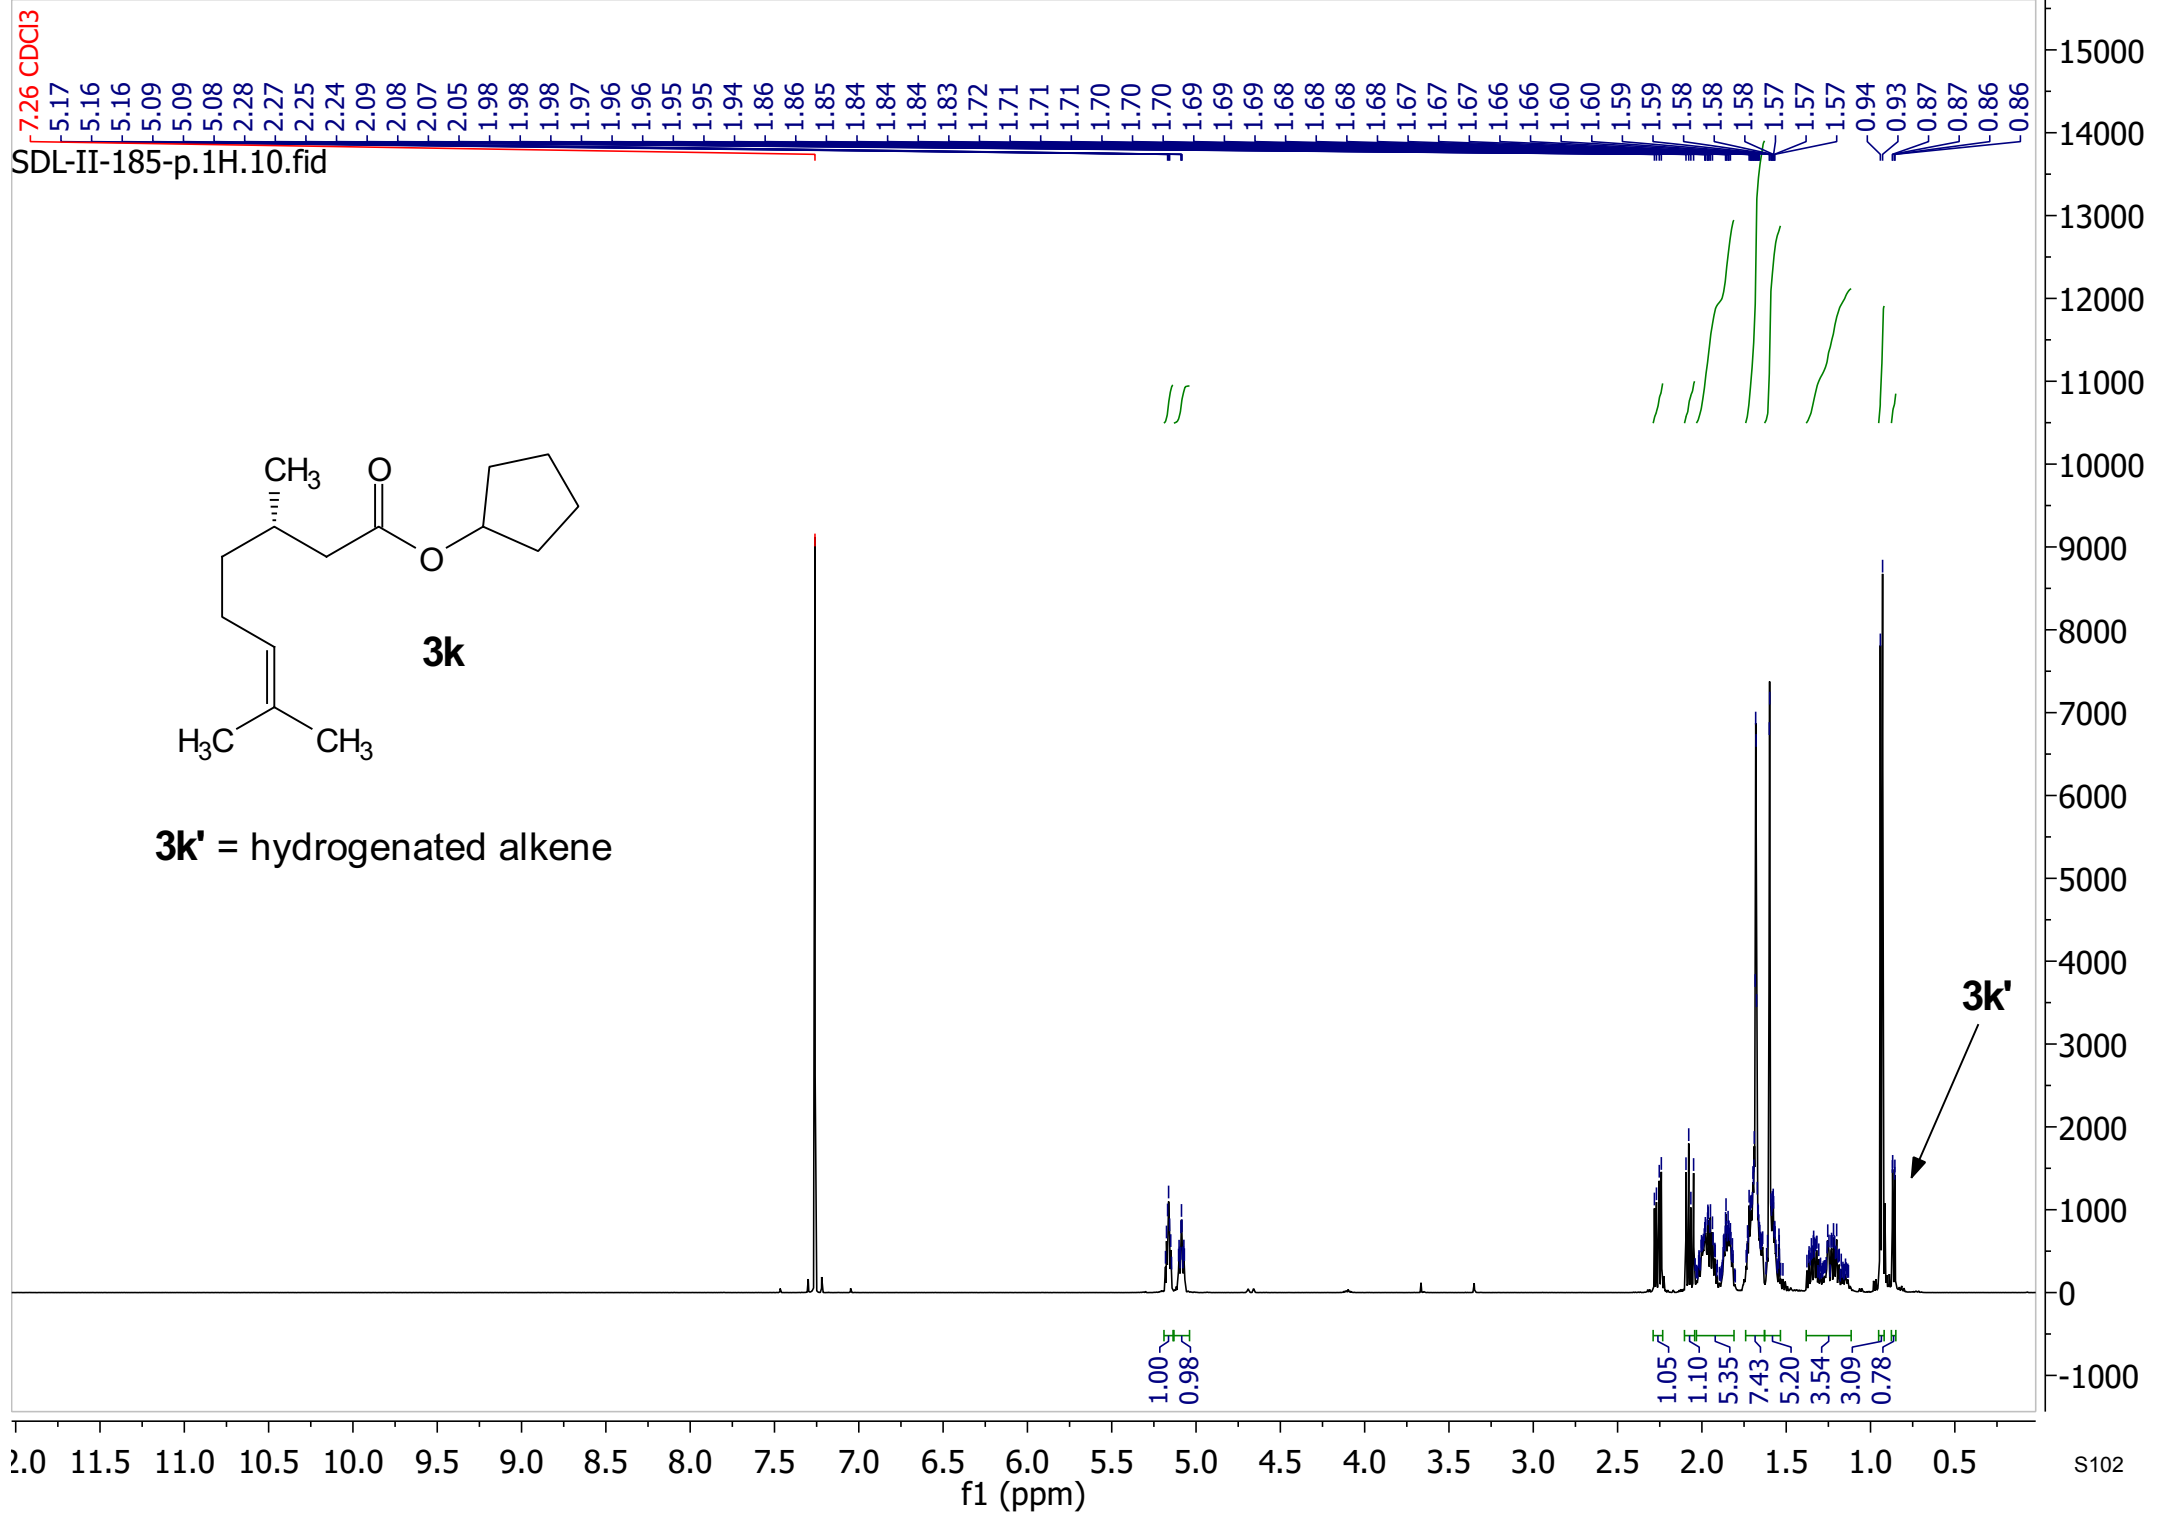

SDL-II-185-p.13C.10.fid

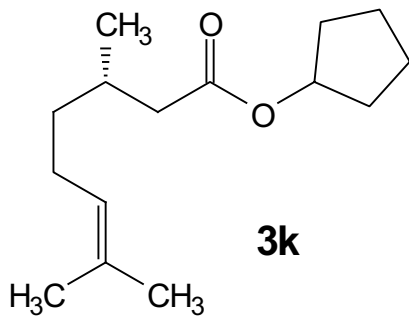

**3k'** = hydrogenated alkene

— 173.25

— 131.64

— 124.48

77.41 CDCl3

77.16 CDCl3

76.91 CDCl3

42.39 3k'

42.30

39.24 3k'

37.09 3k'

36.92

32.85

32.81

30.63 3k'

30.26

28.08 3k'

25.86

25.57

24.78 3k'

23.87

22.81 3k'

22.73 3k'

19.87 3k'

19.74

17.79

10 200 190 180 170 160 150 140 130 120 110 100 90 80 70 60 50 40 30 20 10 0 s103

f1 (ppm)

7.26 CDCl3  
 -5.09  
 -5.09  
 -5.09  
 -4.77  
 -4.76  
 -2.30  
 -2.29  
 -2.28  
 -2.26  
 -2.11  
 -2.10  
 -2.08  
 -2.07  
 -2.01  
 -1.99  
 -1.98  
 -1.98  
 -1.97  
 -1.95  
 -1.85  
 -1.84  
 -1.84  
 -1.83  
 -1.82  
 -1.73  
 -1.72  
 -1.71  
 -1.71  
 -1.70  
 -1.68  
 -1.68  
 -1.60  
 -1.60  
 -1.54  
 -1.42  
 -1.42  
 -1.40  
 -1.40  
 -1.39  
 -1.39  
 -1.38  
 -1.38  
 -1.37  
 -1.36  
 -1.36  
 -1.36  
 -1.35  
 -1.34  
 -1.34  
 -1.33  
 -1.33  
 -1.27  
 -1.26  
 -1.25  
 -1.24  
 -1.24  
 -1.23  
 -1.23  
 -1.22  
 -1.22  
 -1.21  
 -1.21  
 -0.95  
 -0.93  
 -0.87  
 -0.86

SDL-II-180-p.1H  
 STANDARD PROTON PARAMETERS

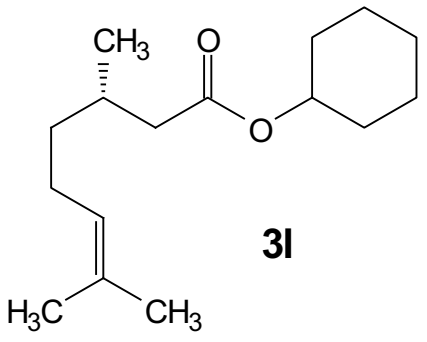

**3I'** = hydrogenated alkene

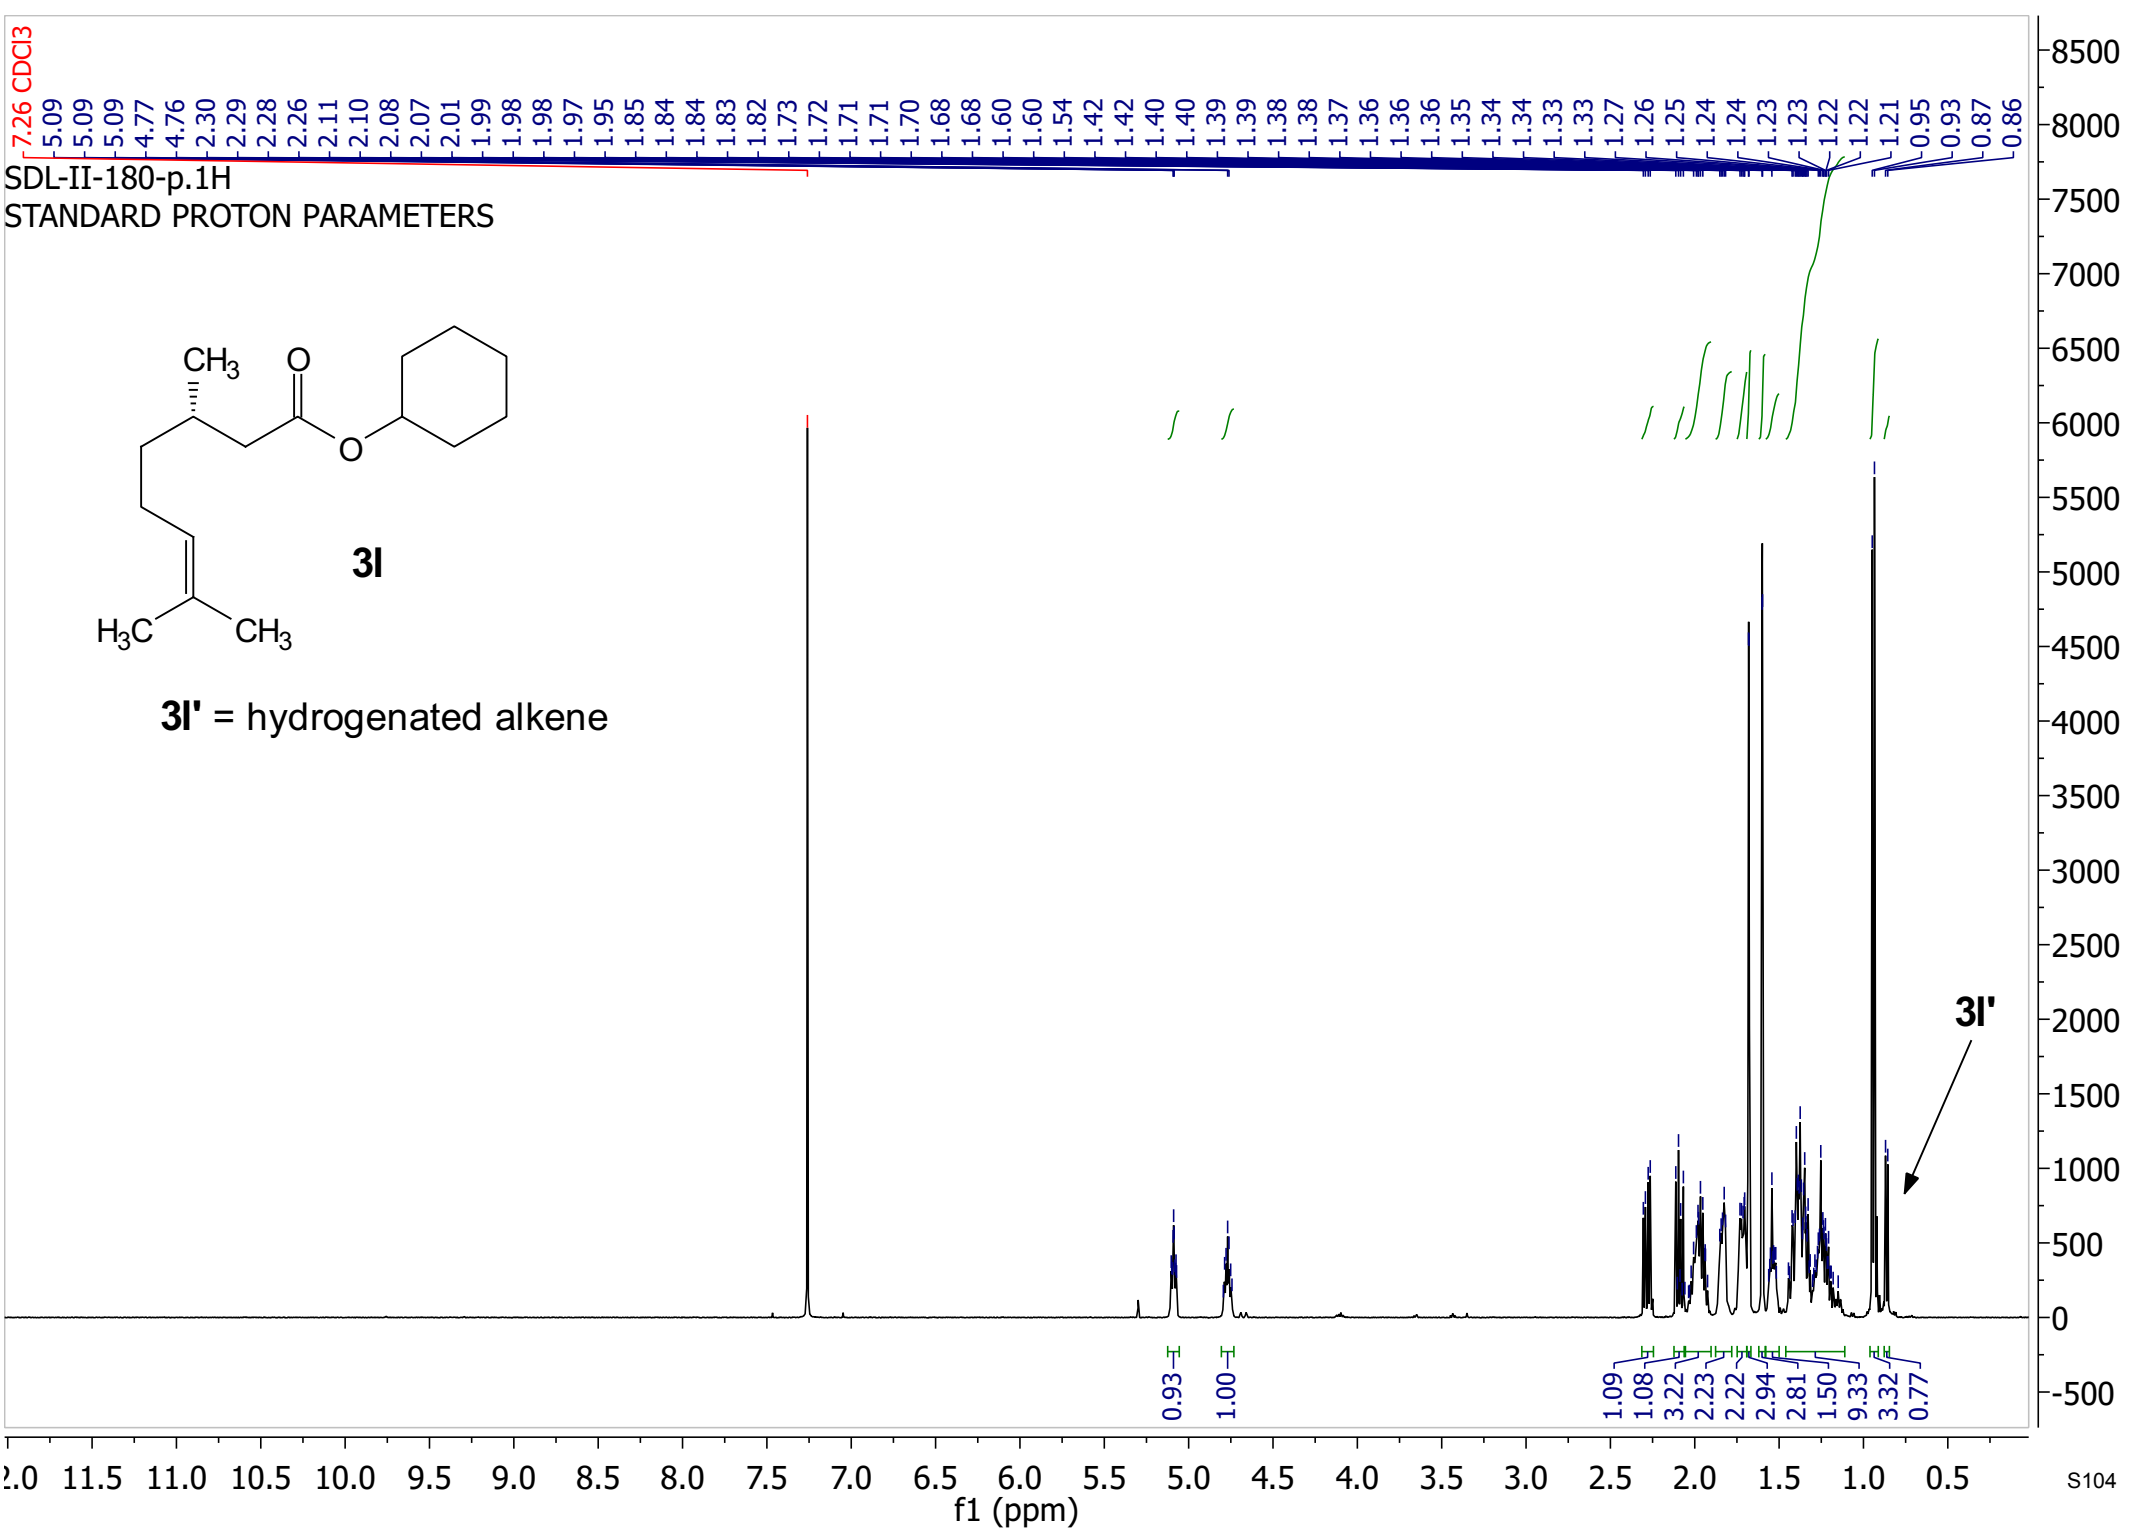



SDL-II-180-p.13C.10.fid

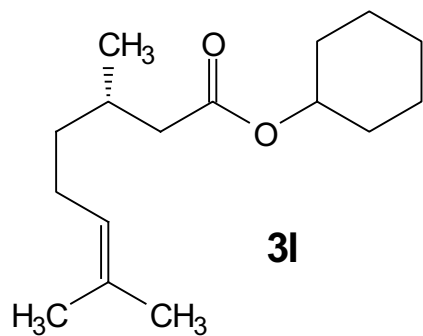

**3I'** = hydrogenated alkene

— 172.89

— 131.62

— 124.50

77.41 CDCl3

77.16 CDCl3

76.91 CDCl3

72.41

42.49 3I'

42.40

39.24 3I'

37.10 3I'

36.93

31.87

31.83

30.67 3I'

30.30

28.07 3I'

25.86

25.58

24.79 3I'

23.93

22.81 3I'

22.73 3I'

19.84 3I'

19.72

17.80

200 190 180 170 160 150 140 130 120 110 100 90 80 70 60 50 40 30 20 10

f1 (ppm)

S105

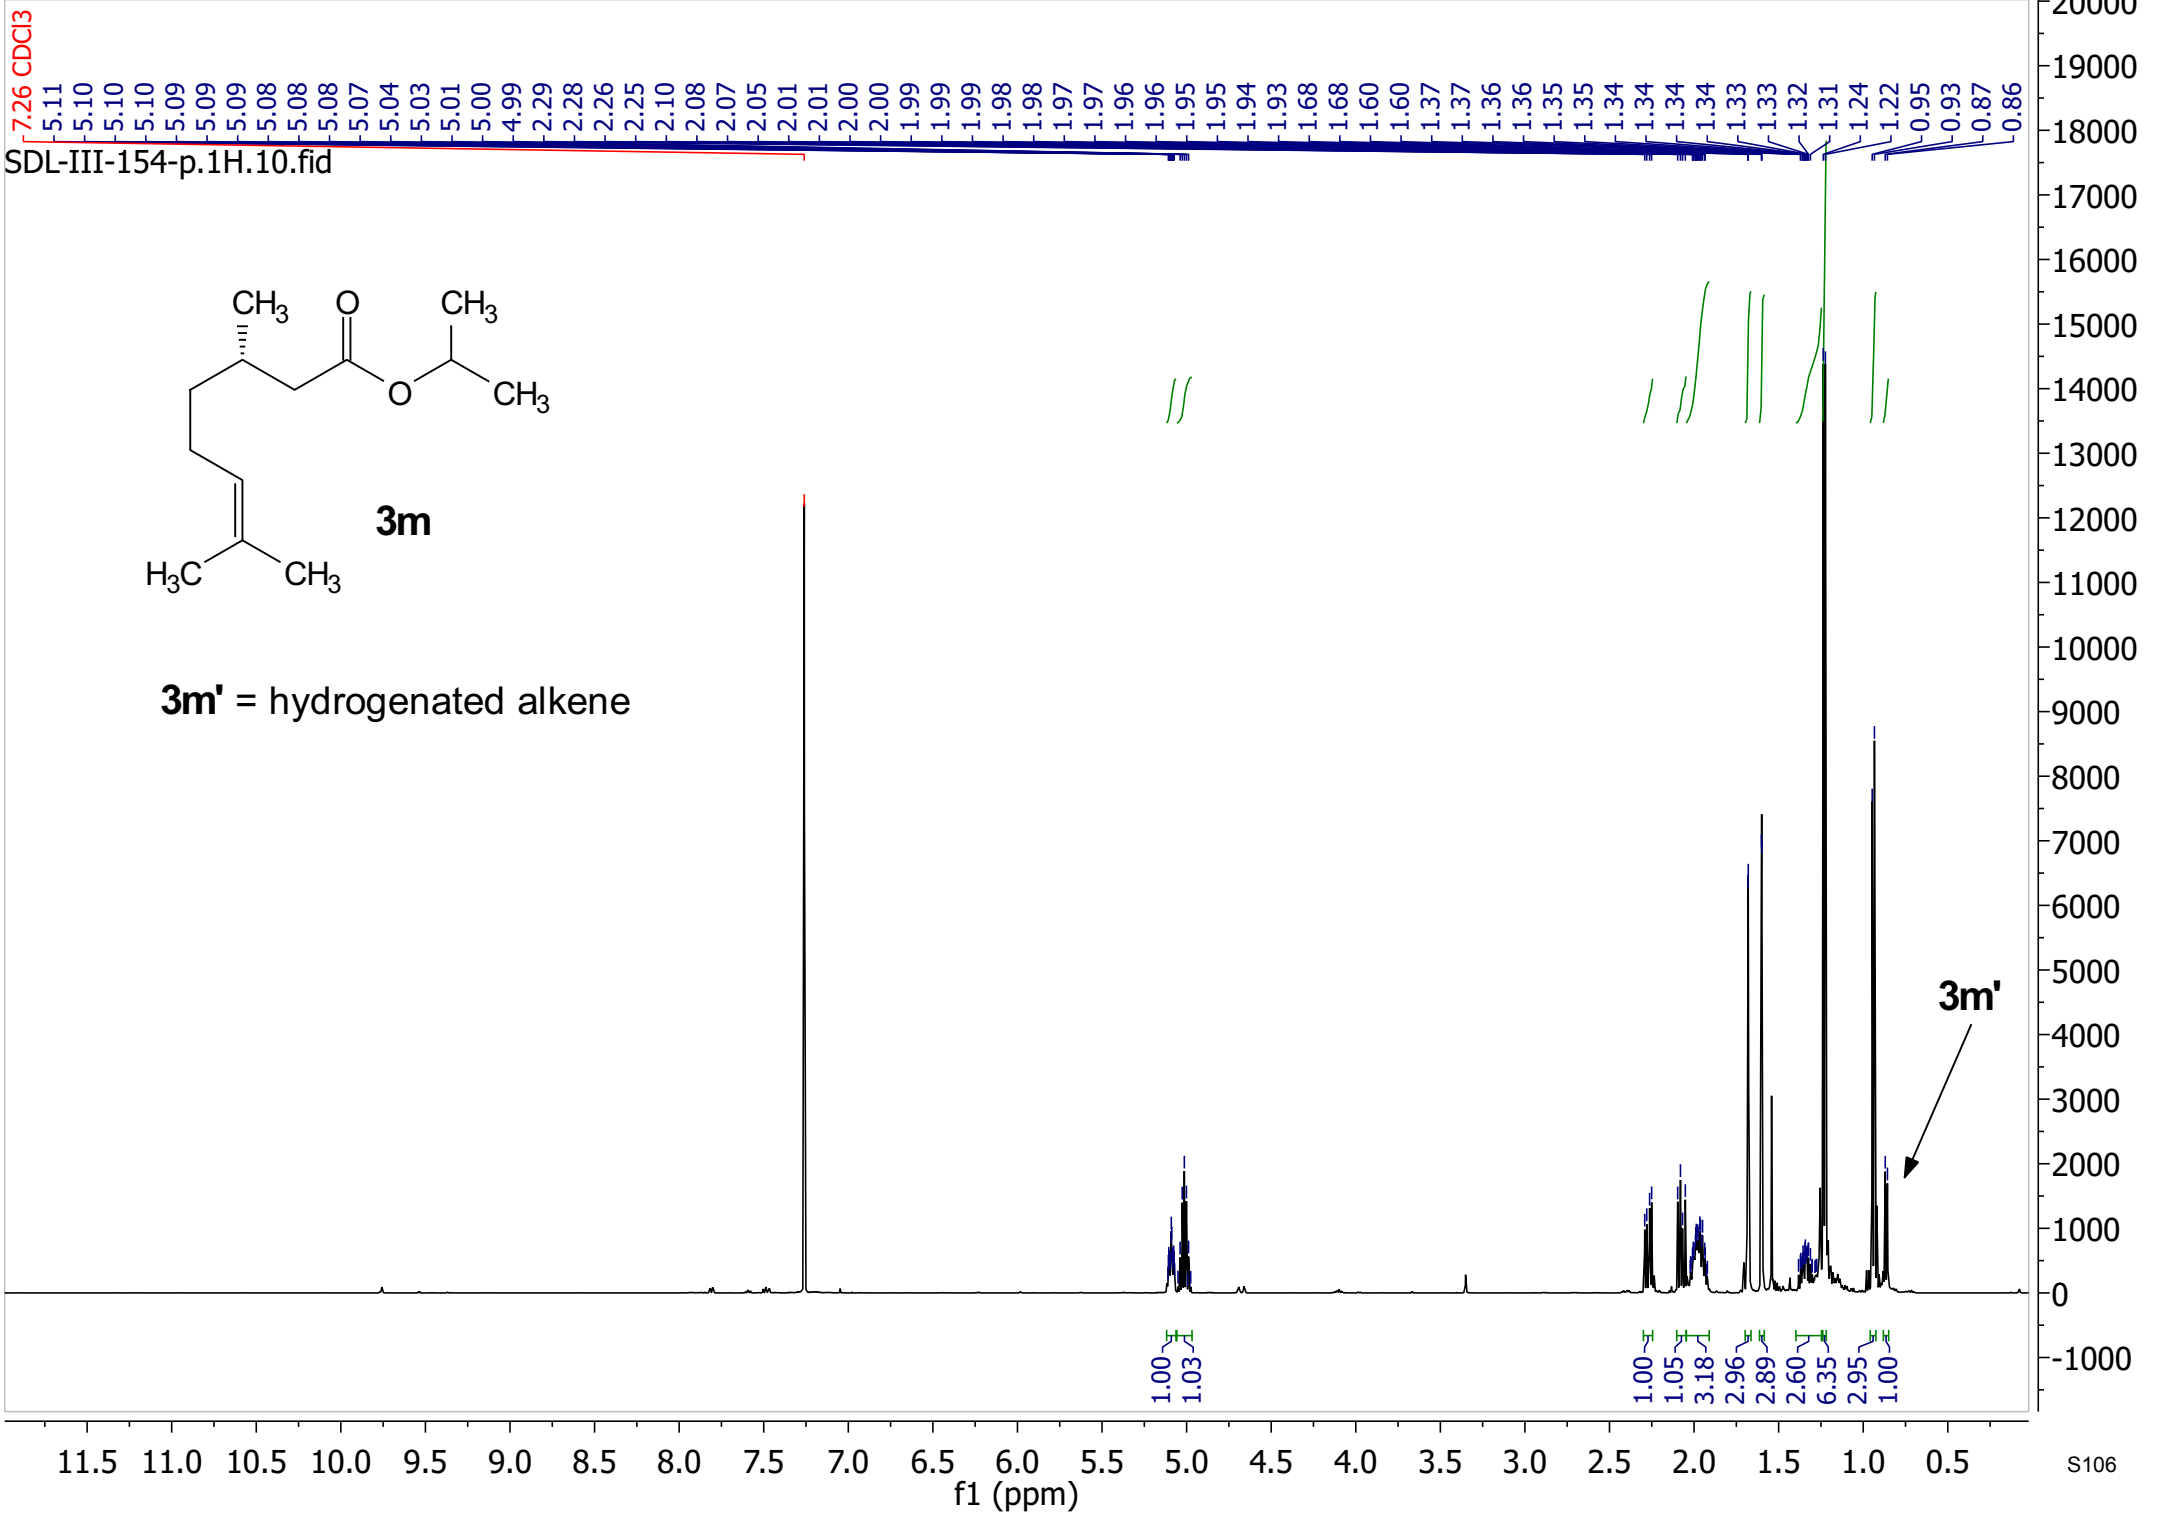

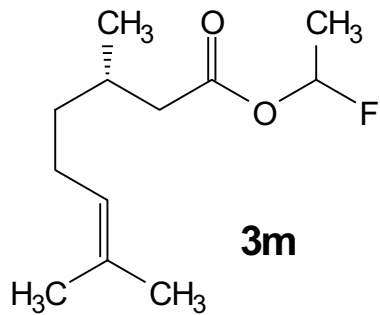

**3m'** = hydrogenated alkene

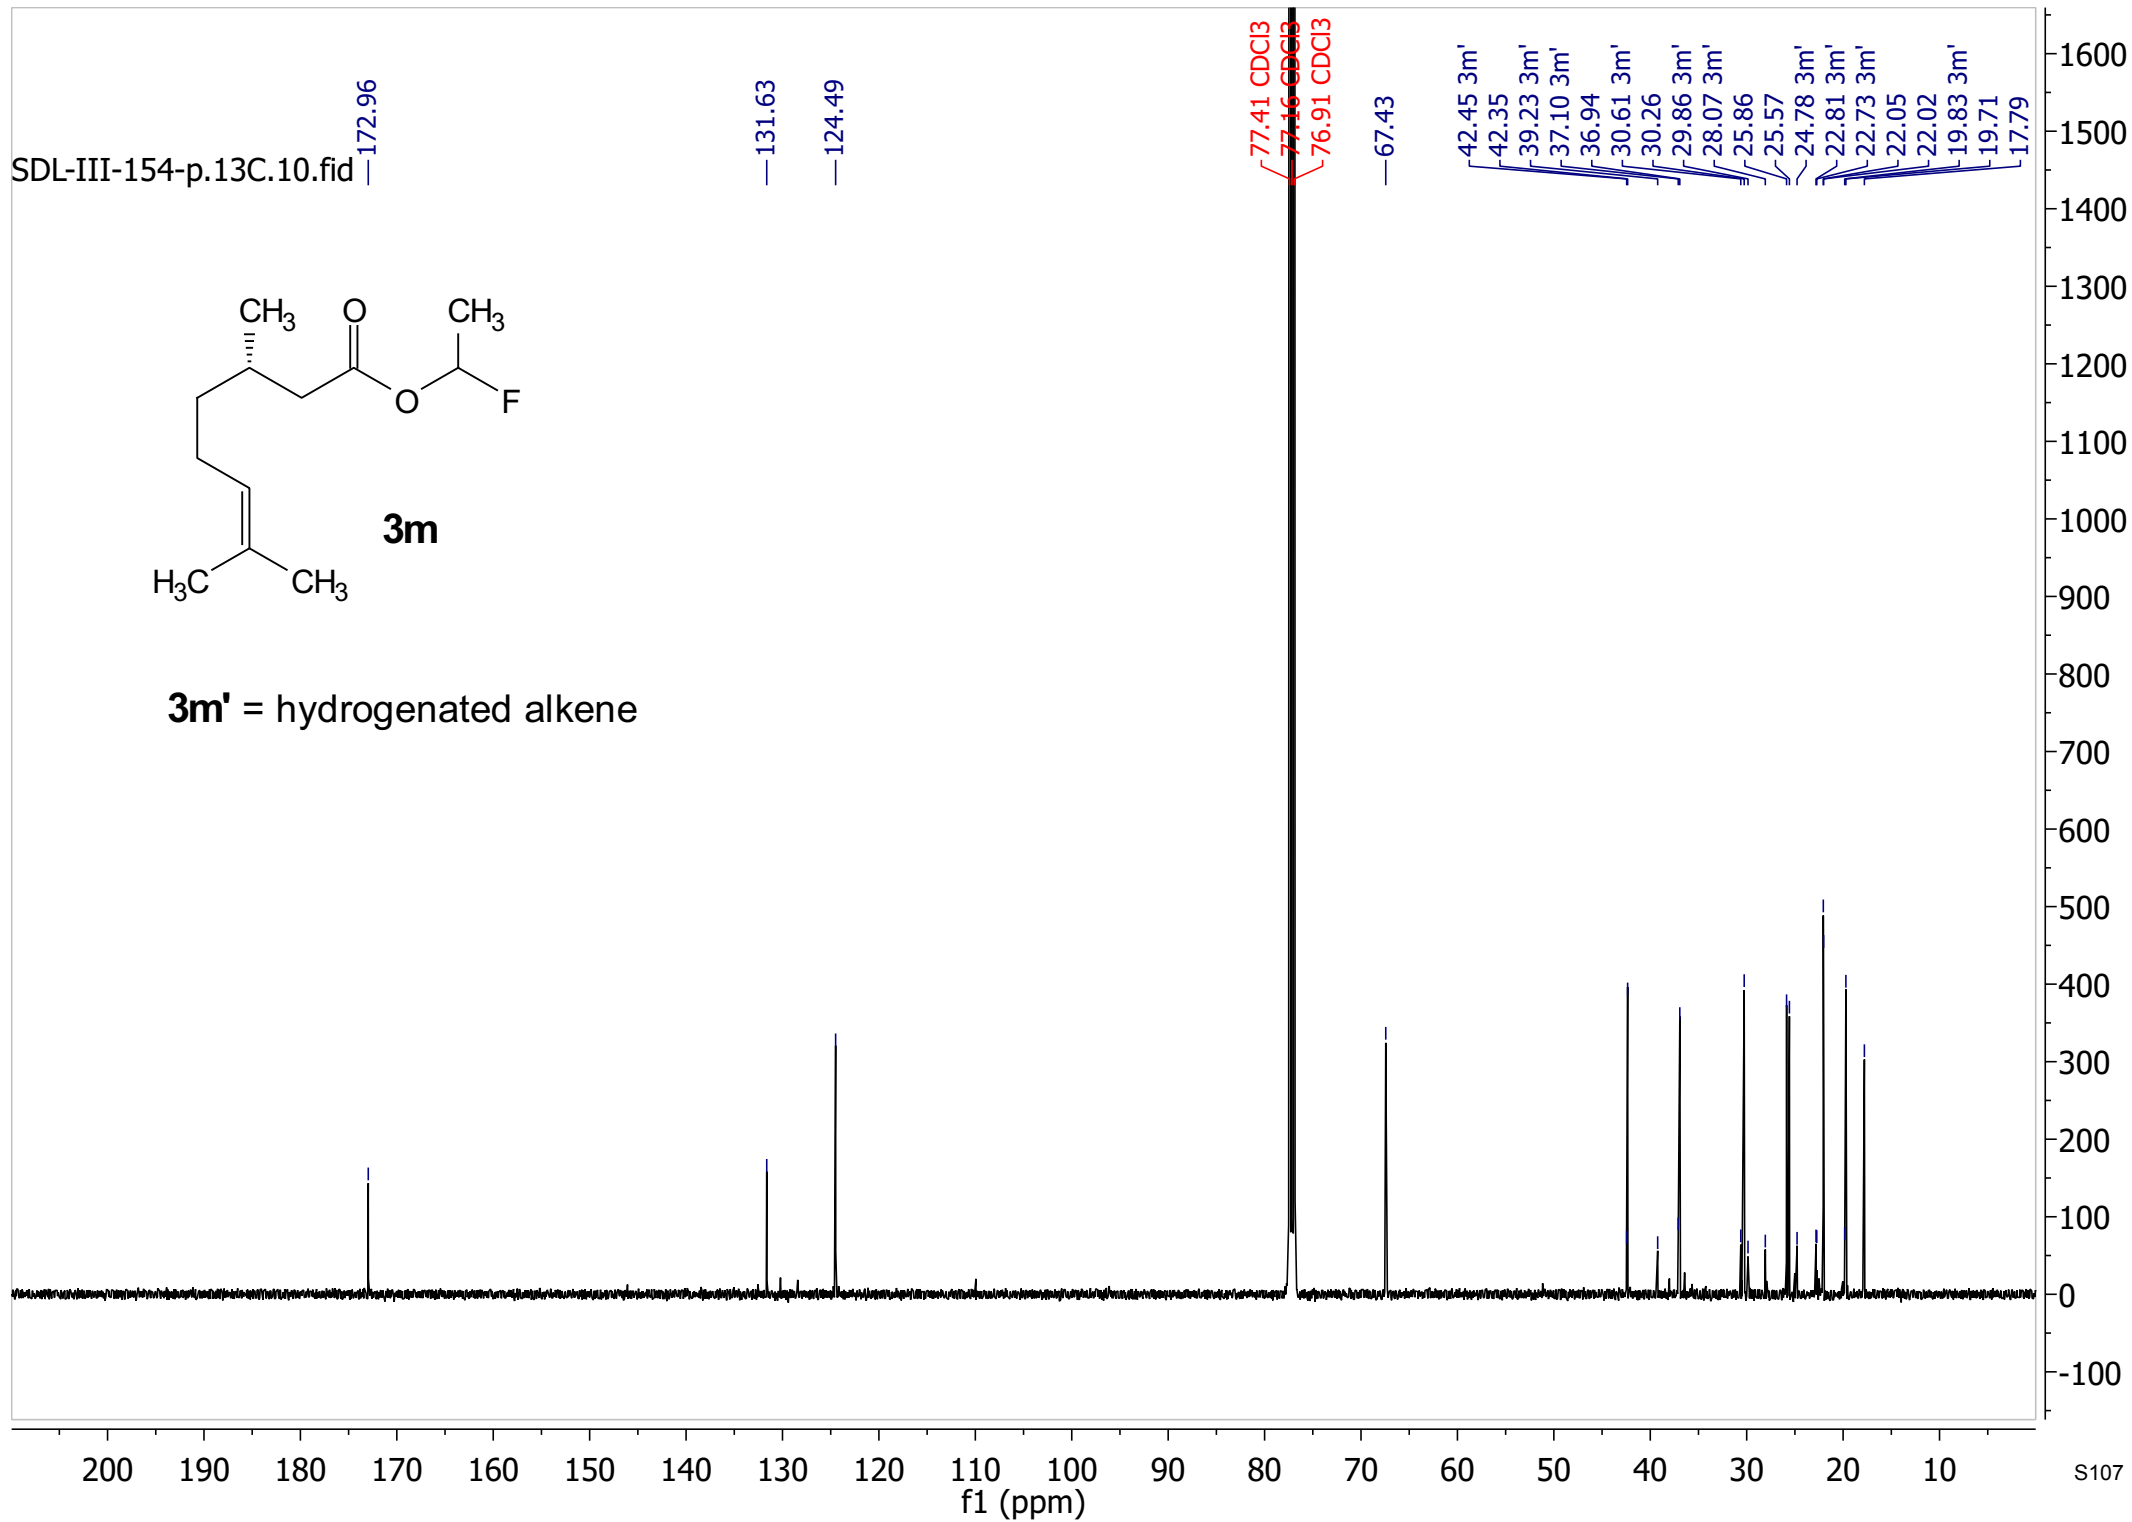

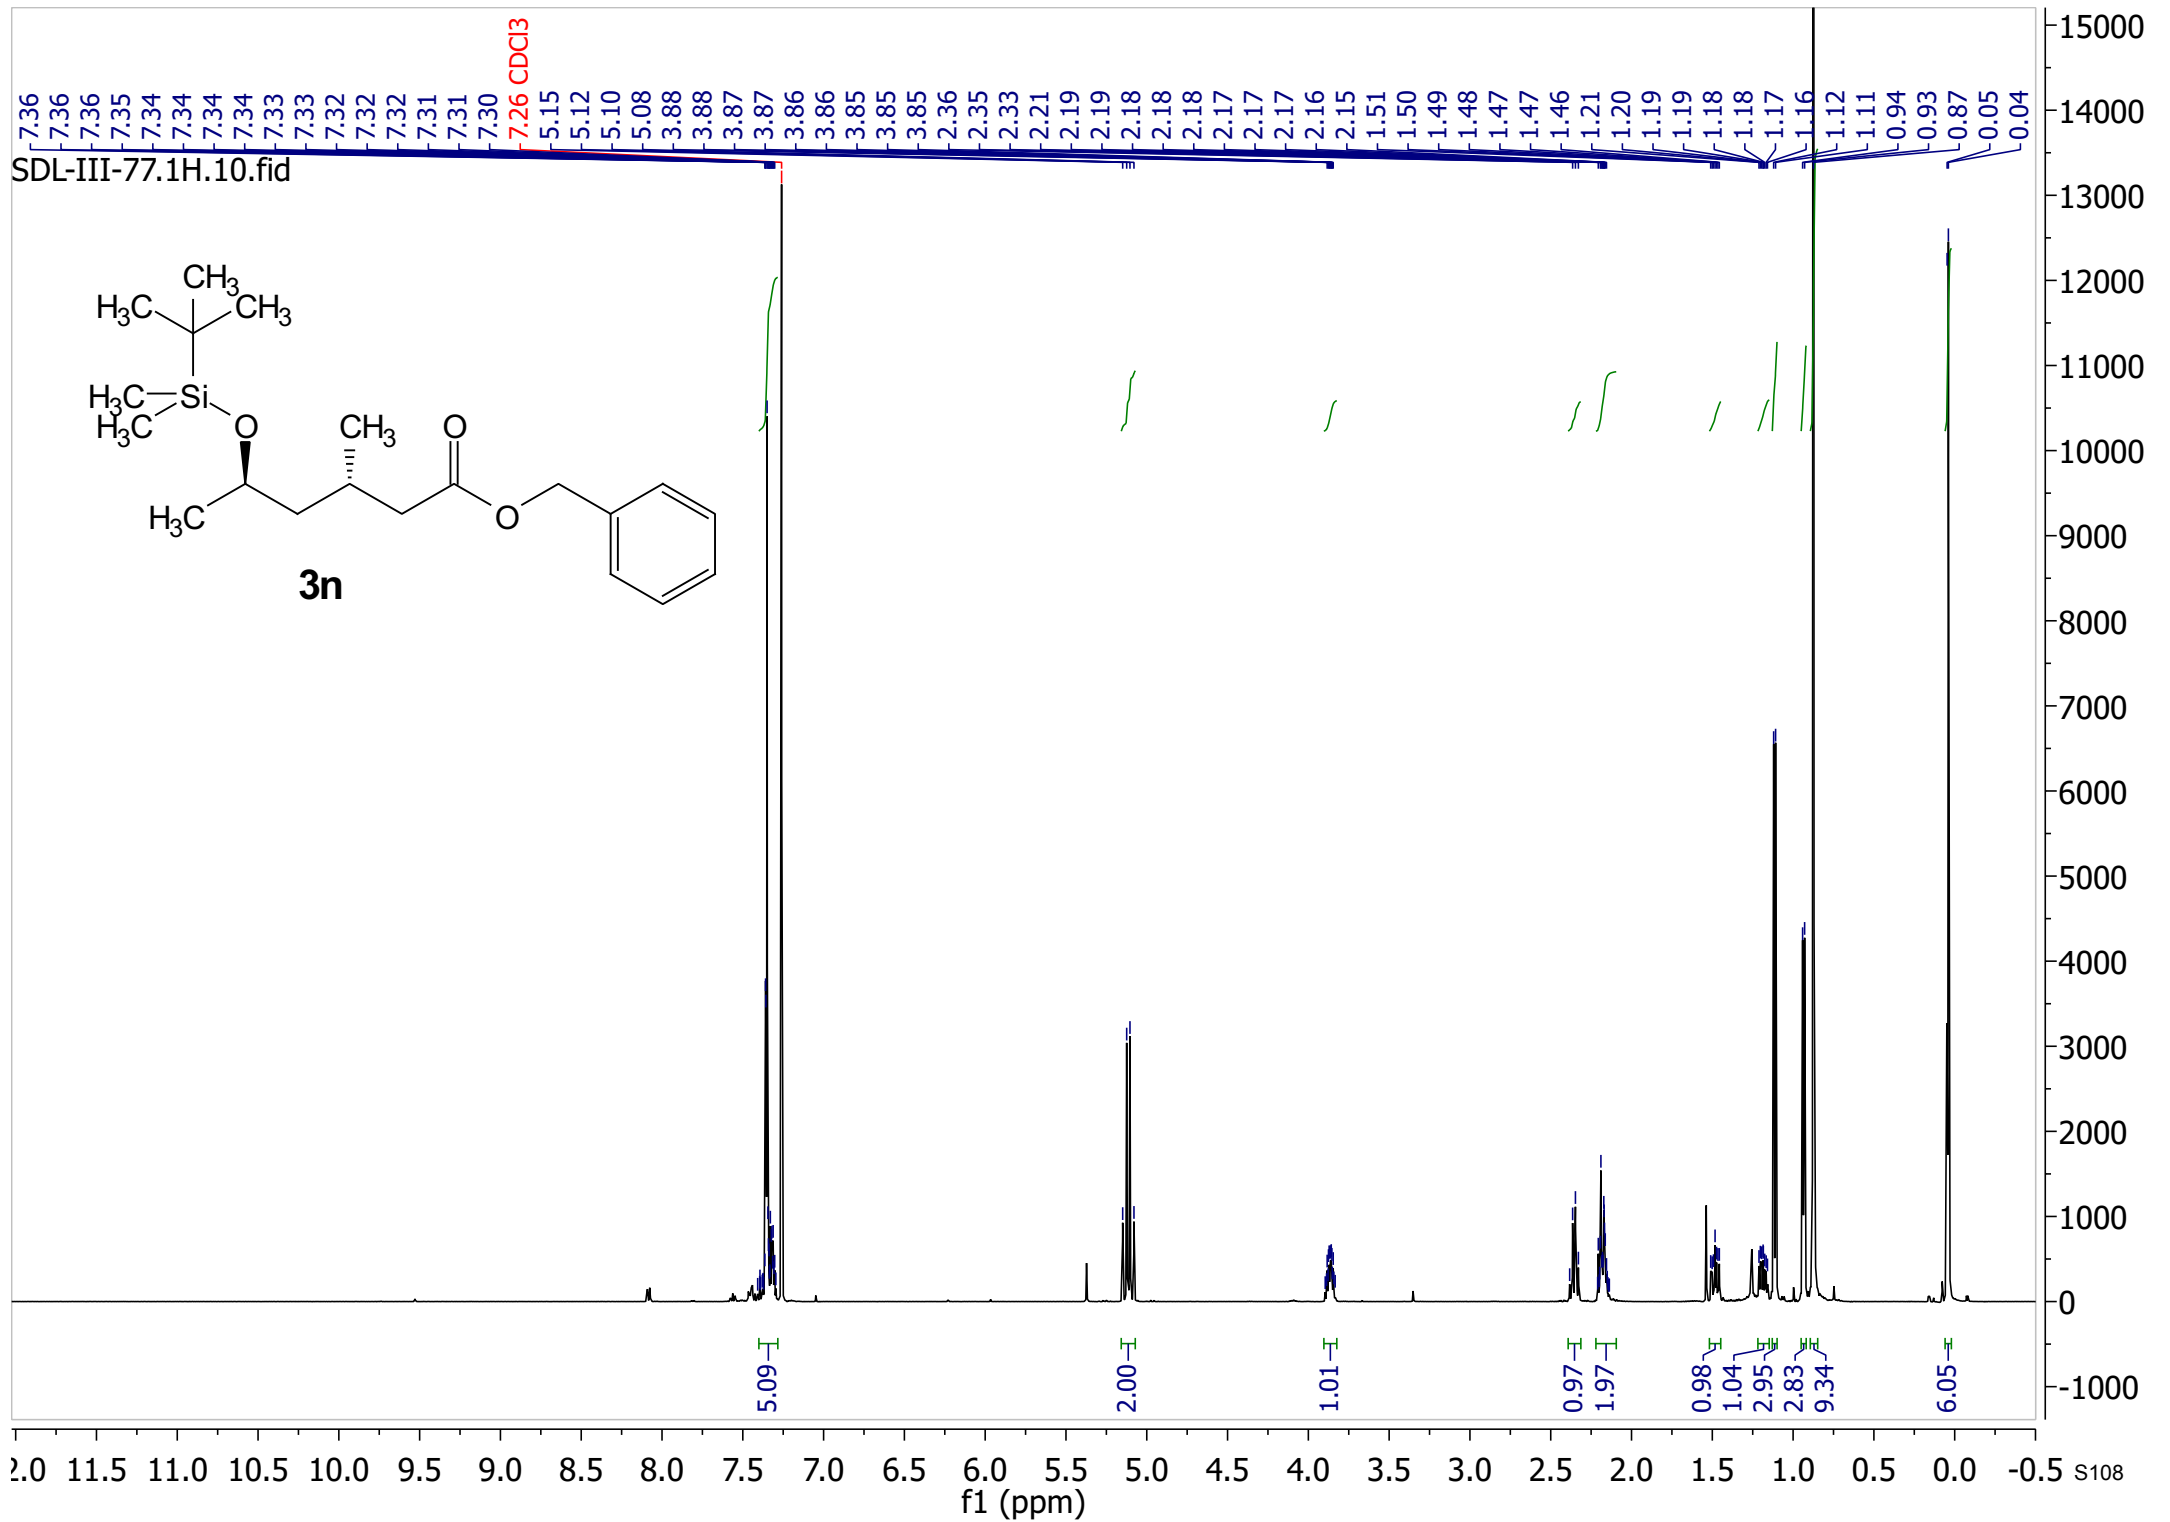

SDL-III-77.13C.10.fid

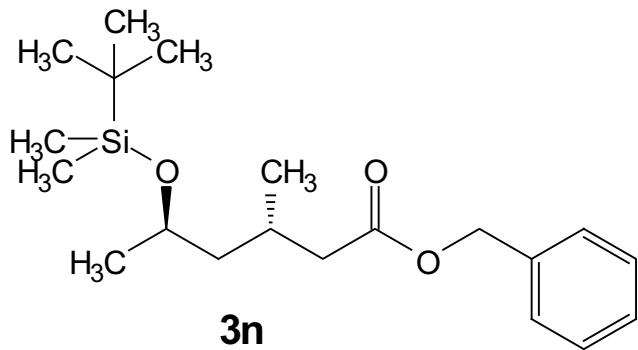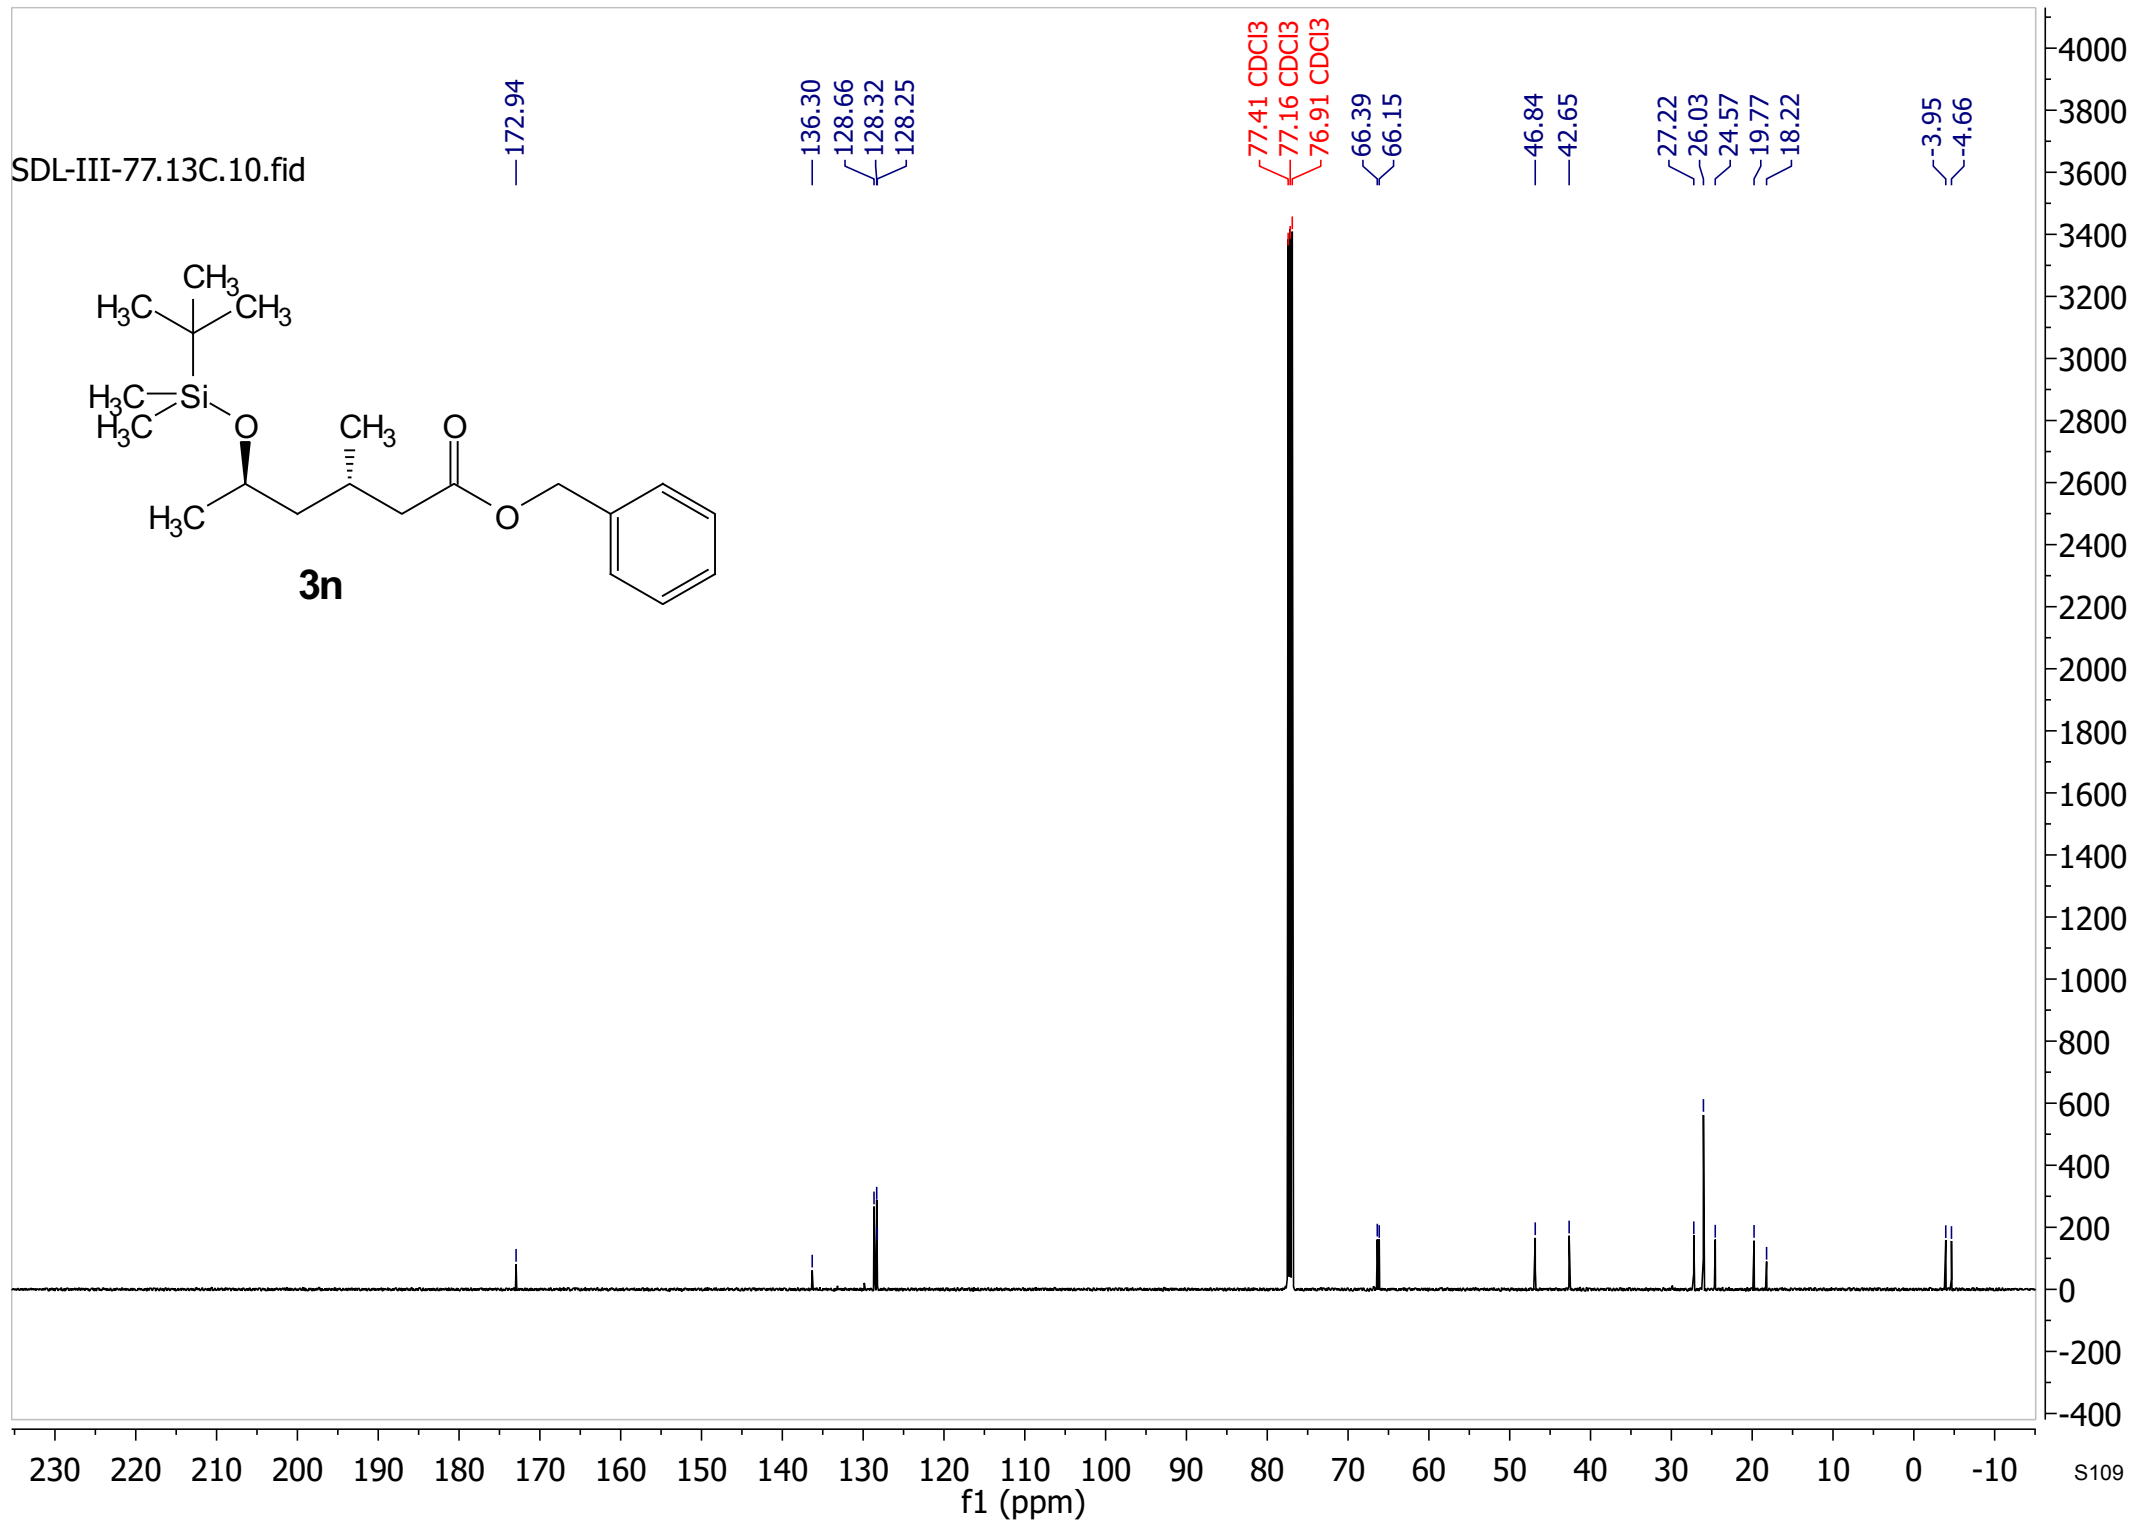

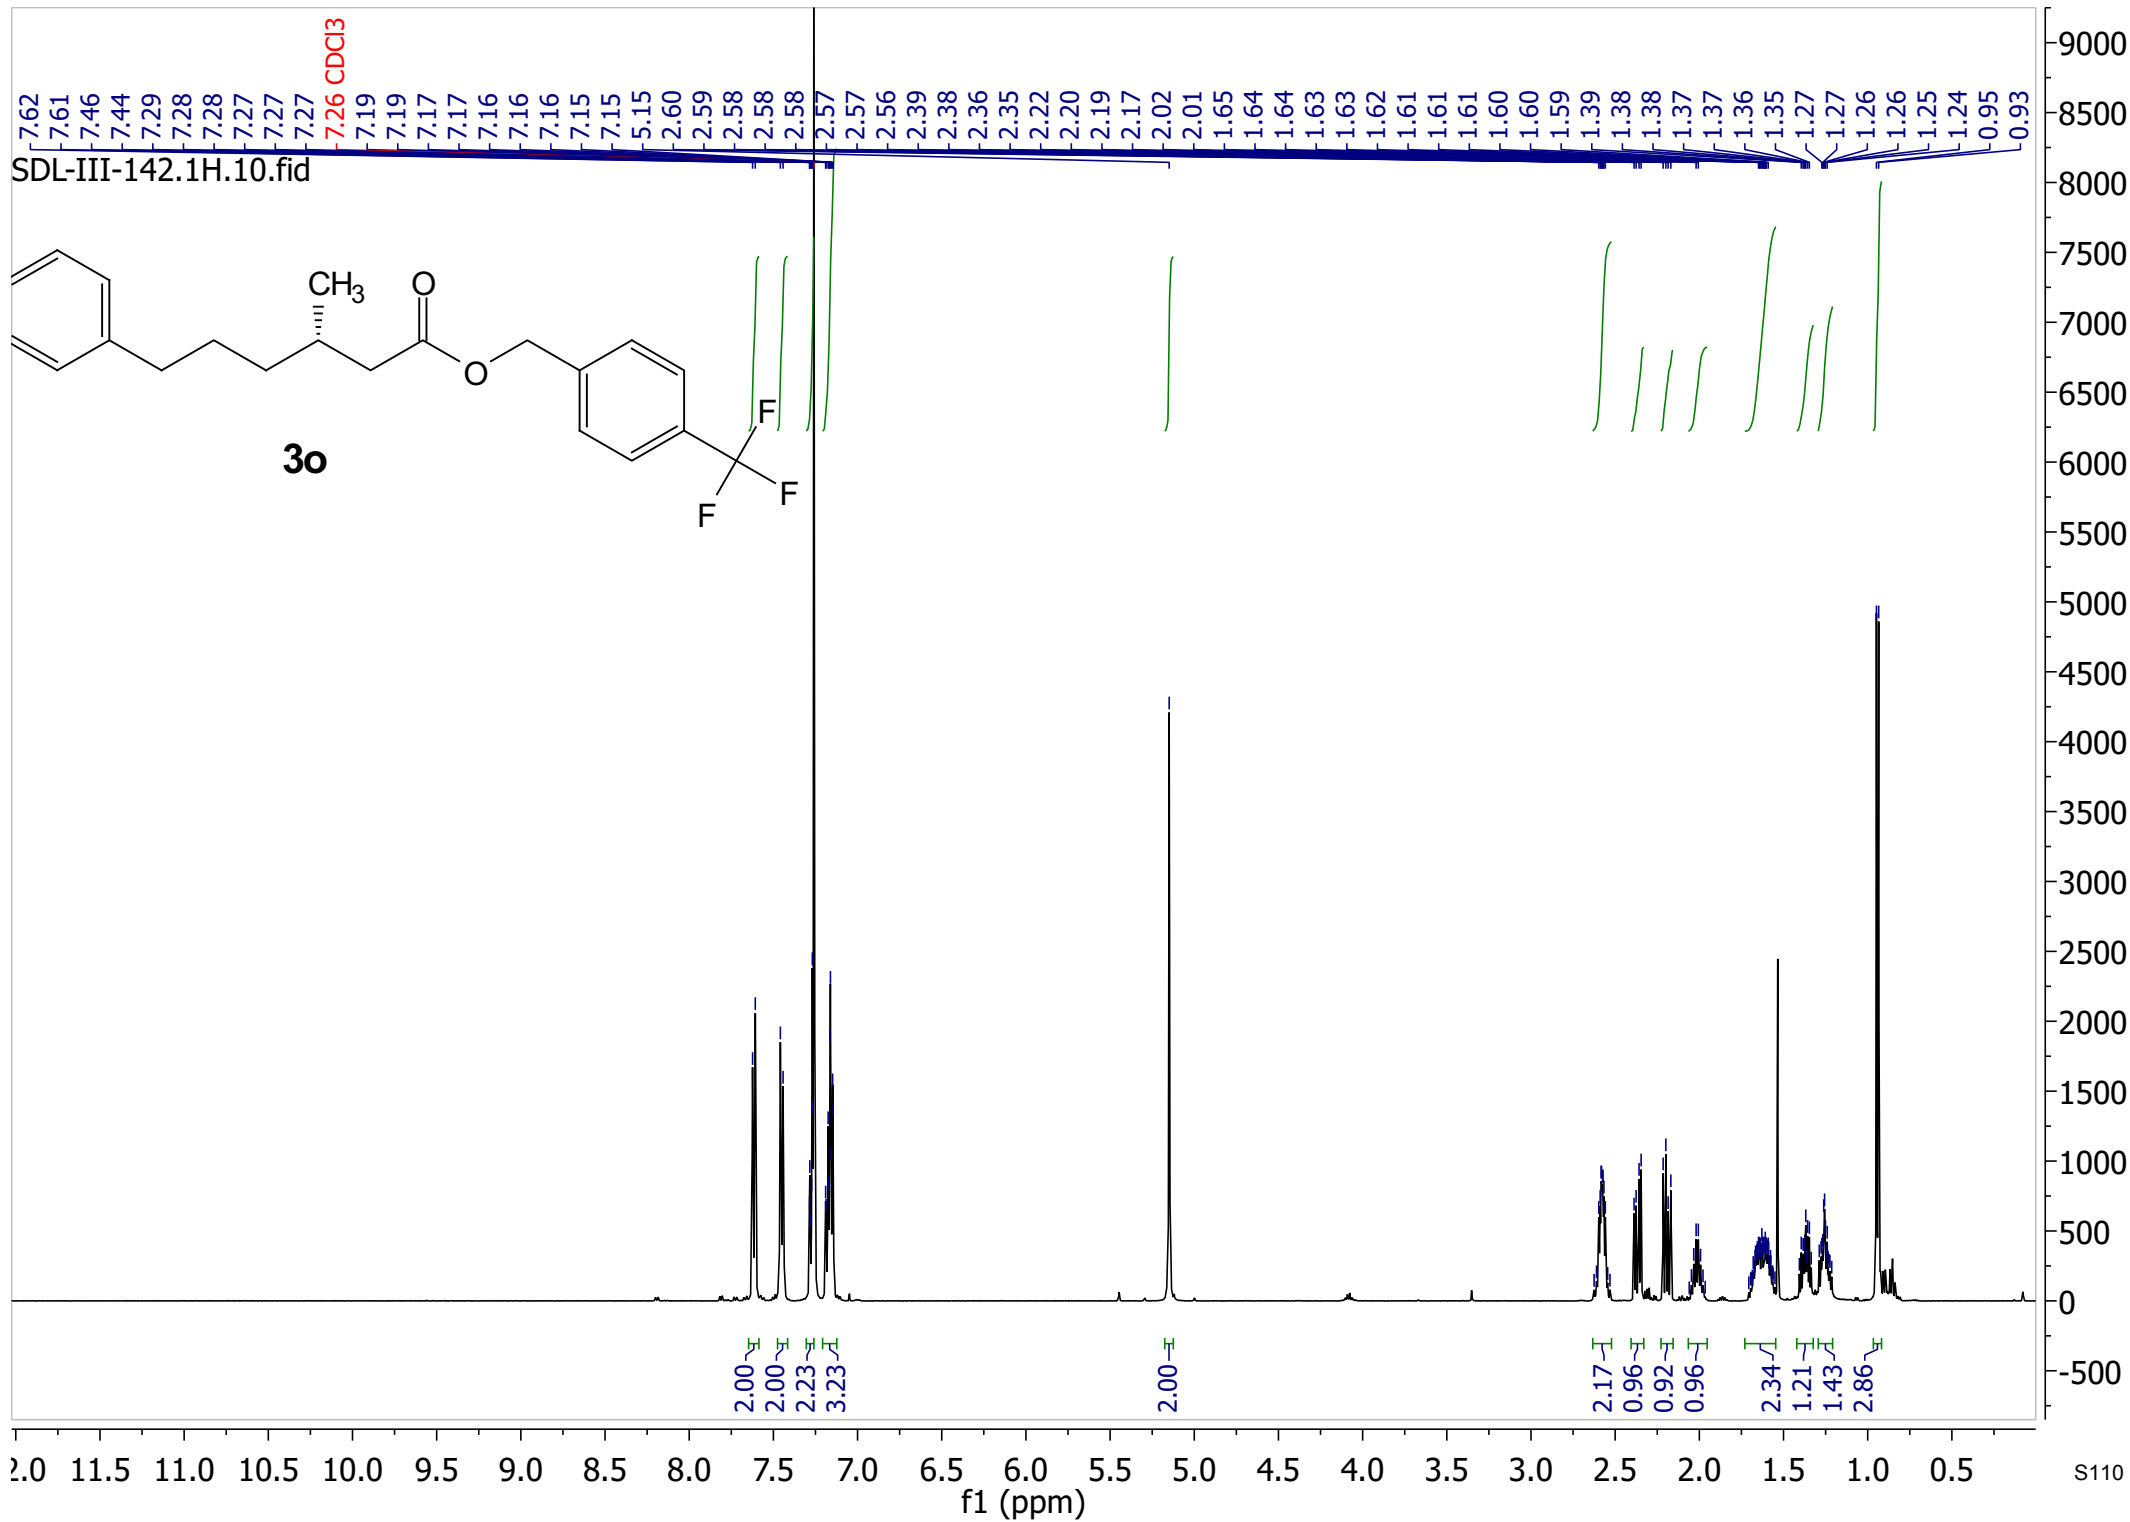

SDL-III-142.13C.10.fid

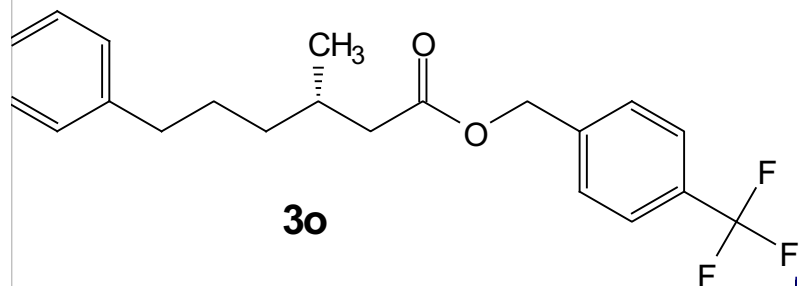

— 172.97

— 142.57  
— 140.25  
— 130.86  
— 130.60  
— 130.35  
— 130.09  
— 128.49  
— 128.43  
— 128.30  
— 127.40  
— 125.86  
— 125.70  
— 125.67  
— 125.64  
— 125.61  
— 125.24  
— 123.07  
— 120.91

77.41 CDC13  
77.16 CDC13  
76.91 CDC13

— 65.21

— 41.81  
— 36.42  
— 36.14  
— 30.47  
— 28.95

— 19.87

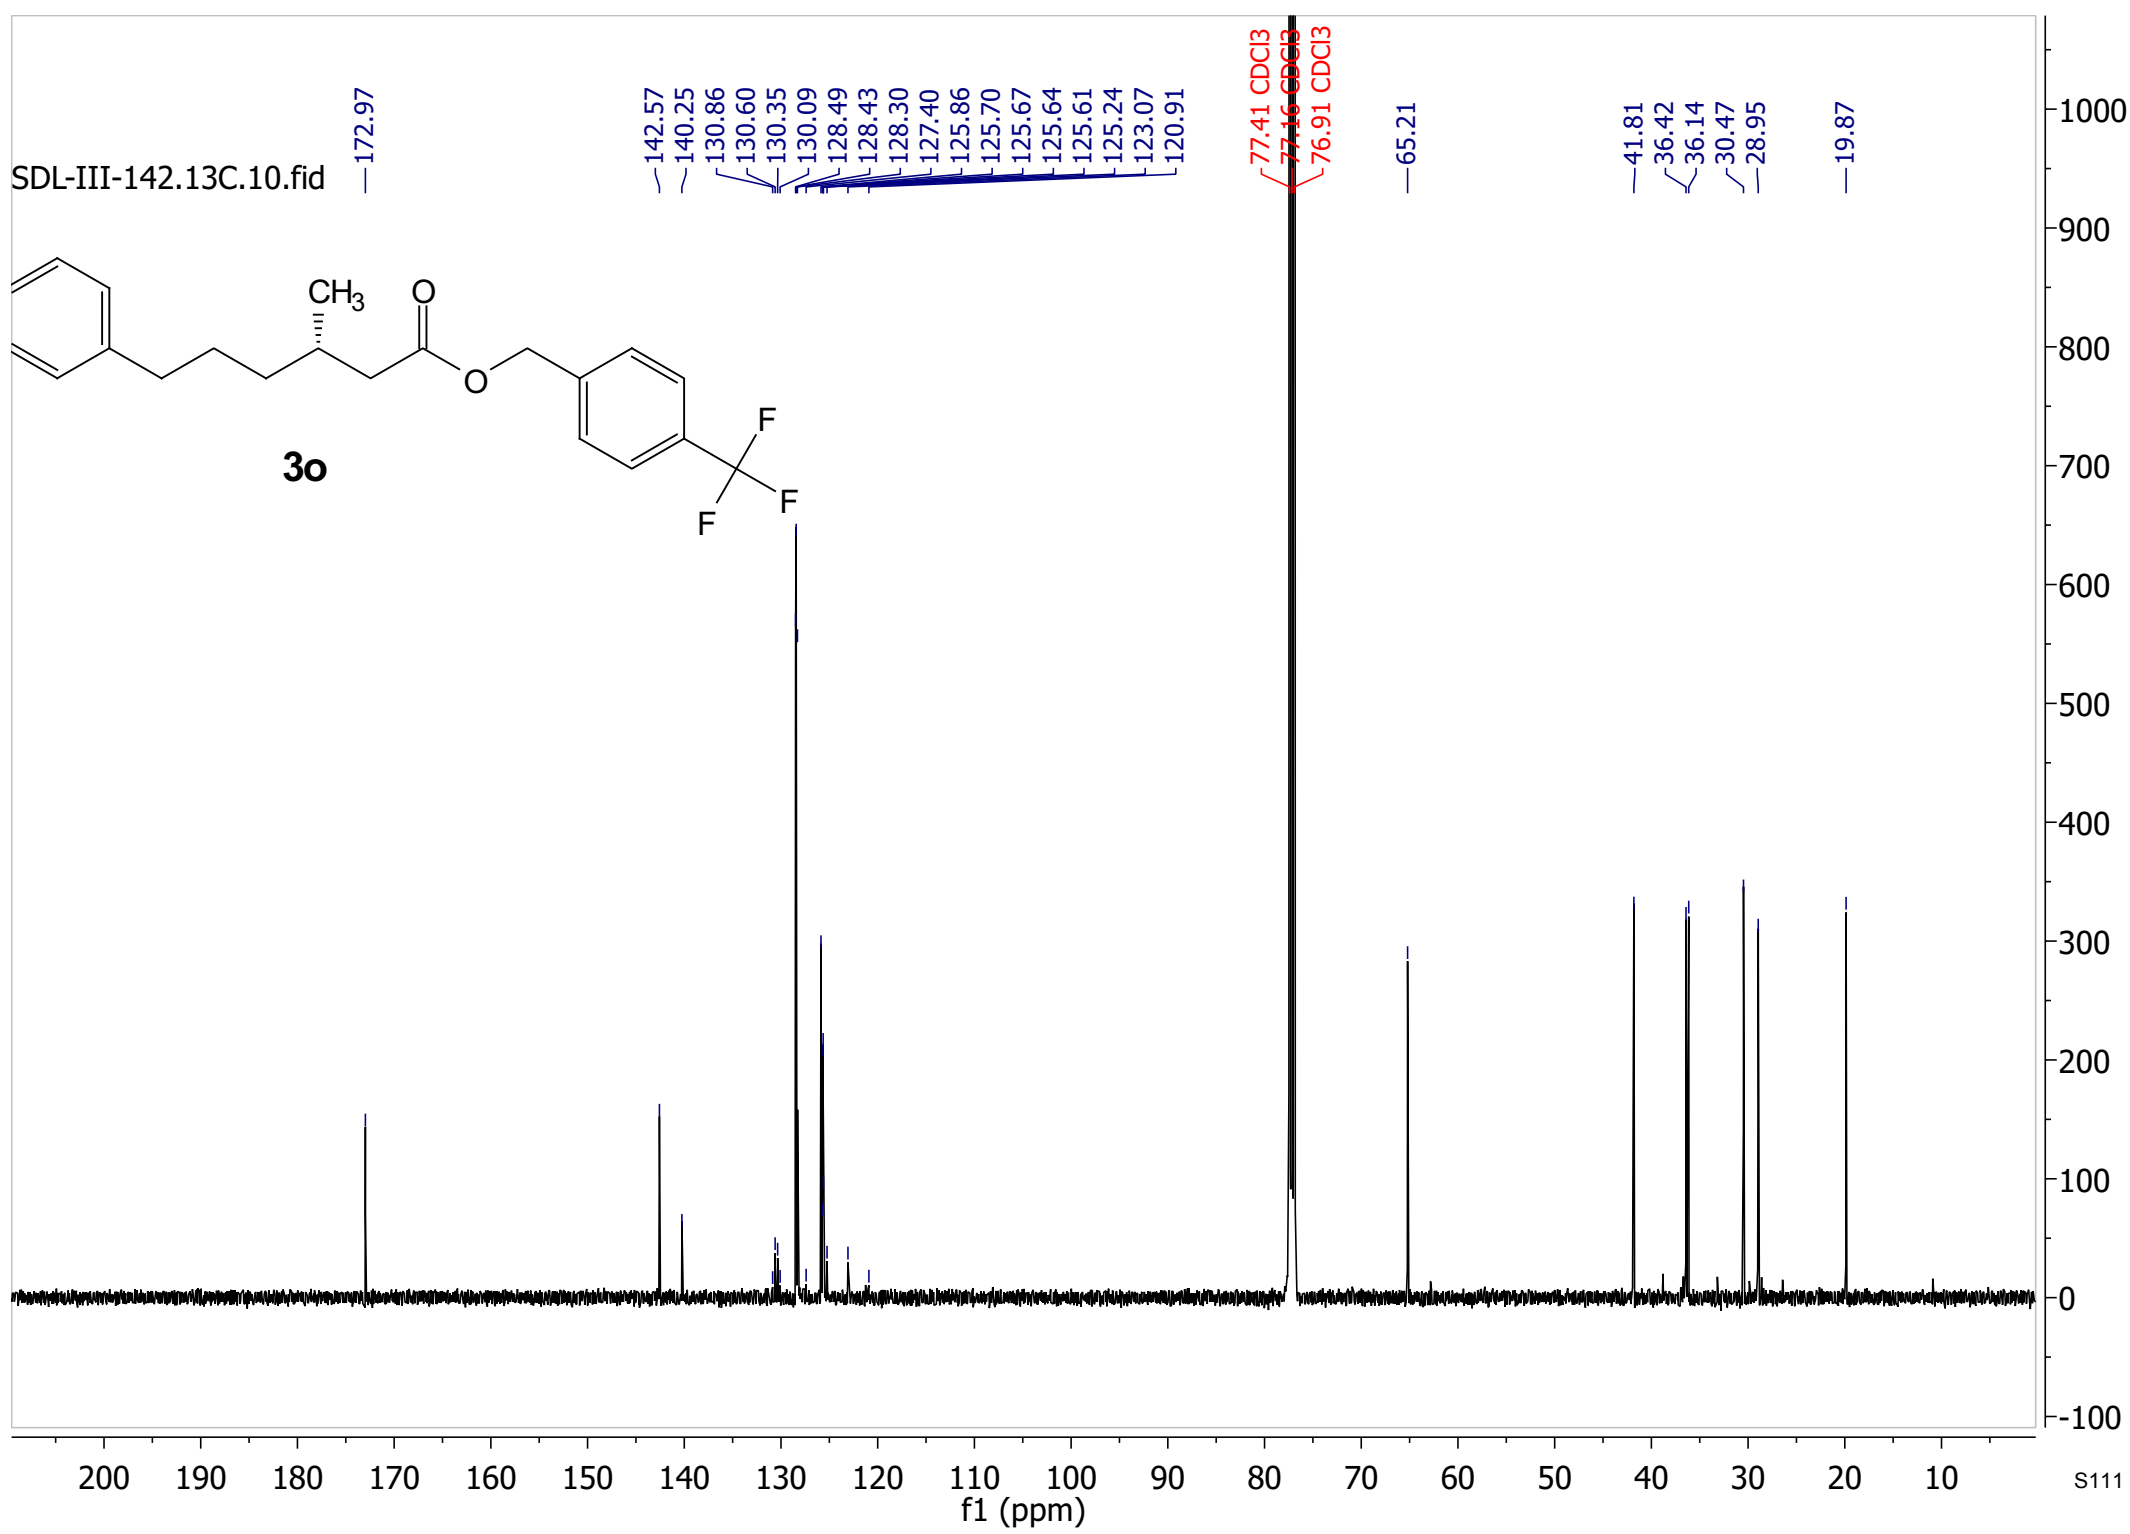

SDL-III-142.19F.10.fid

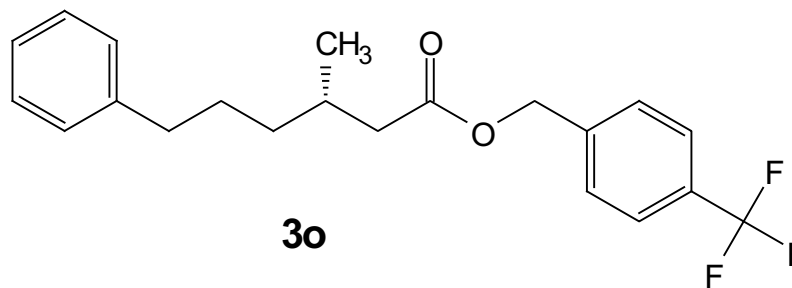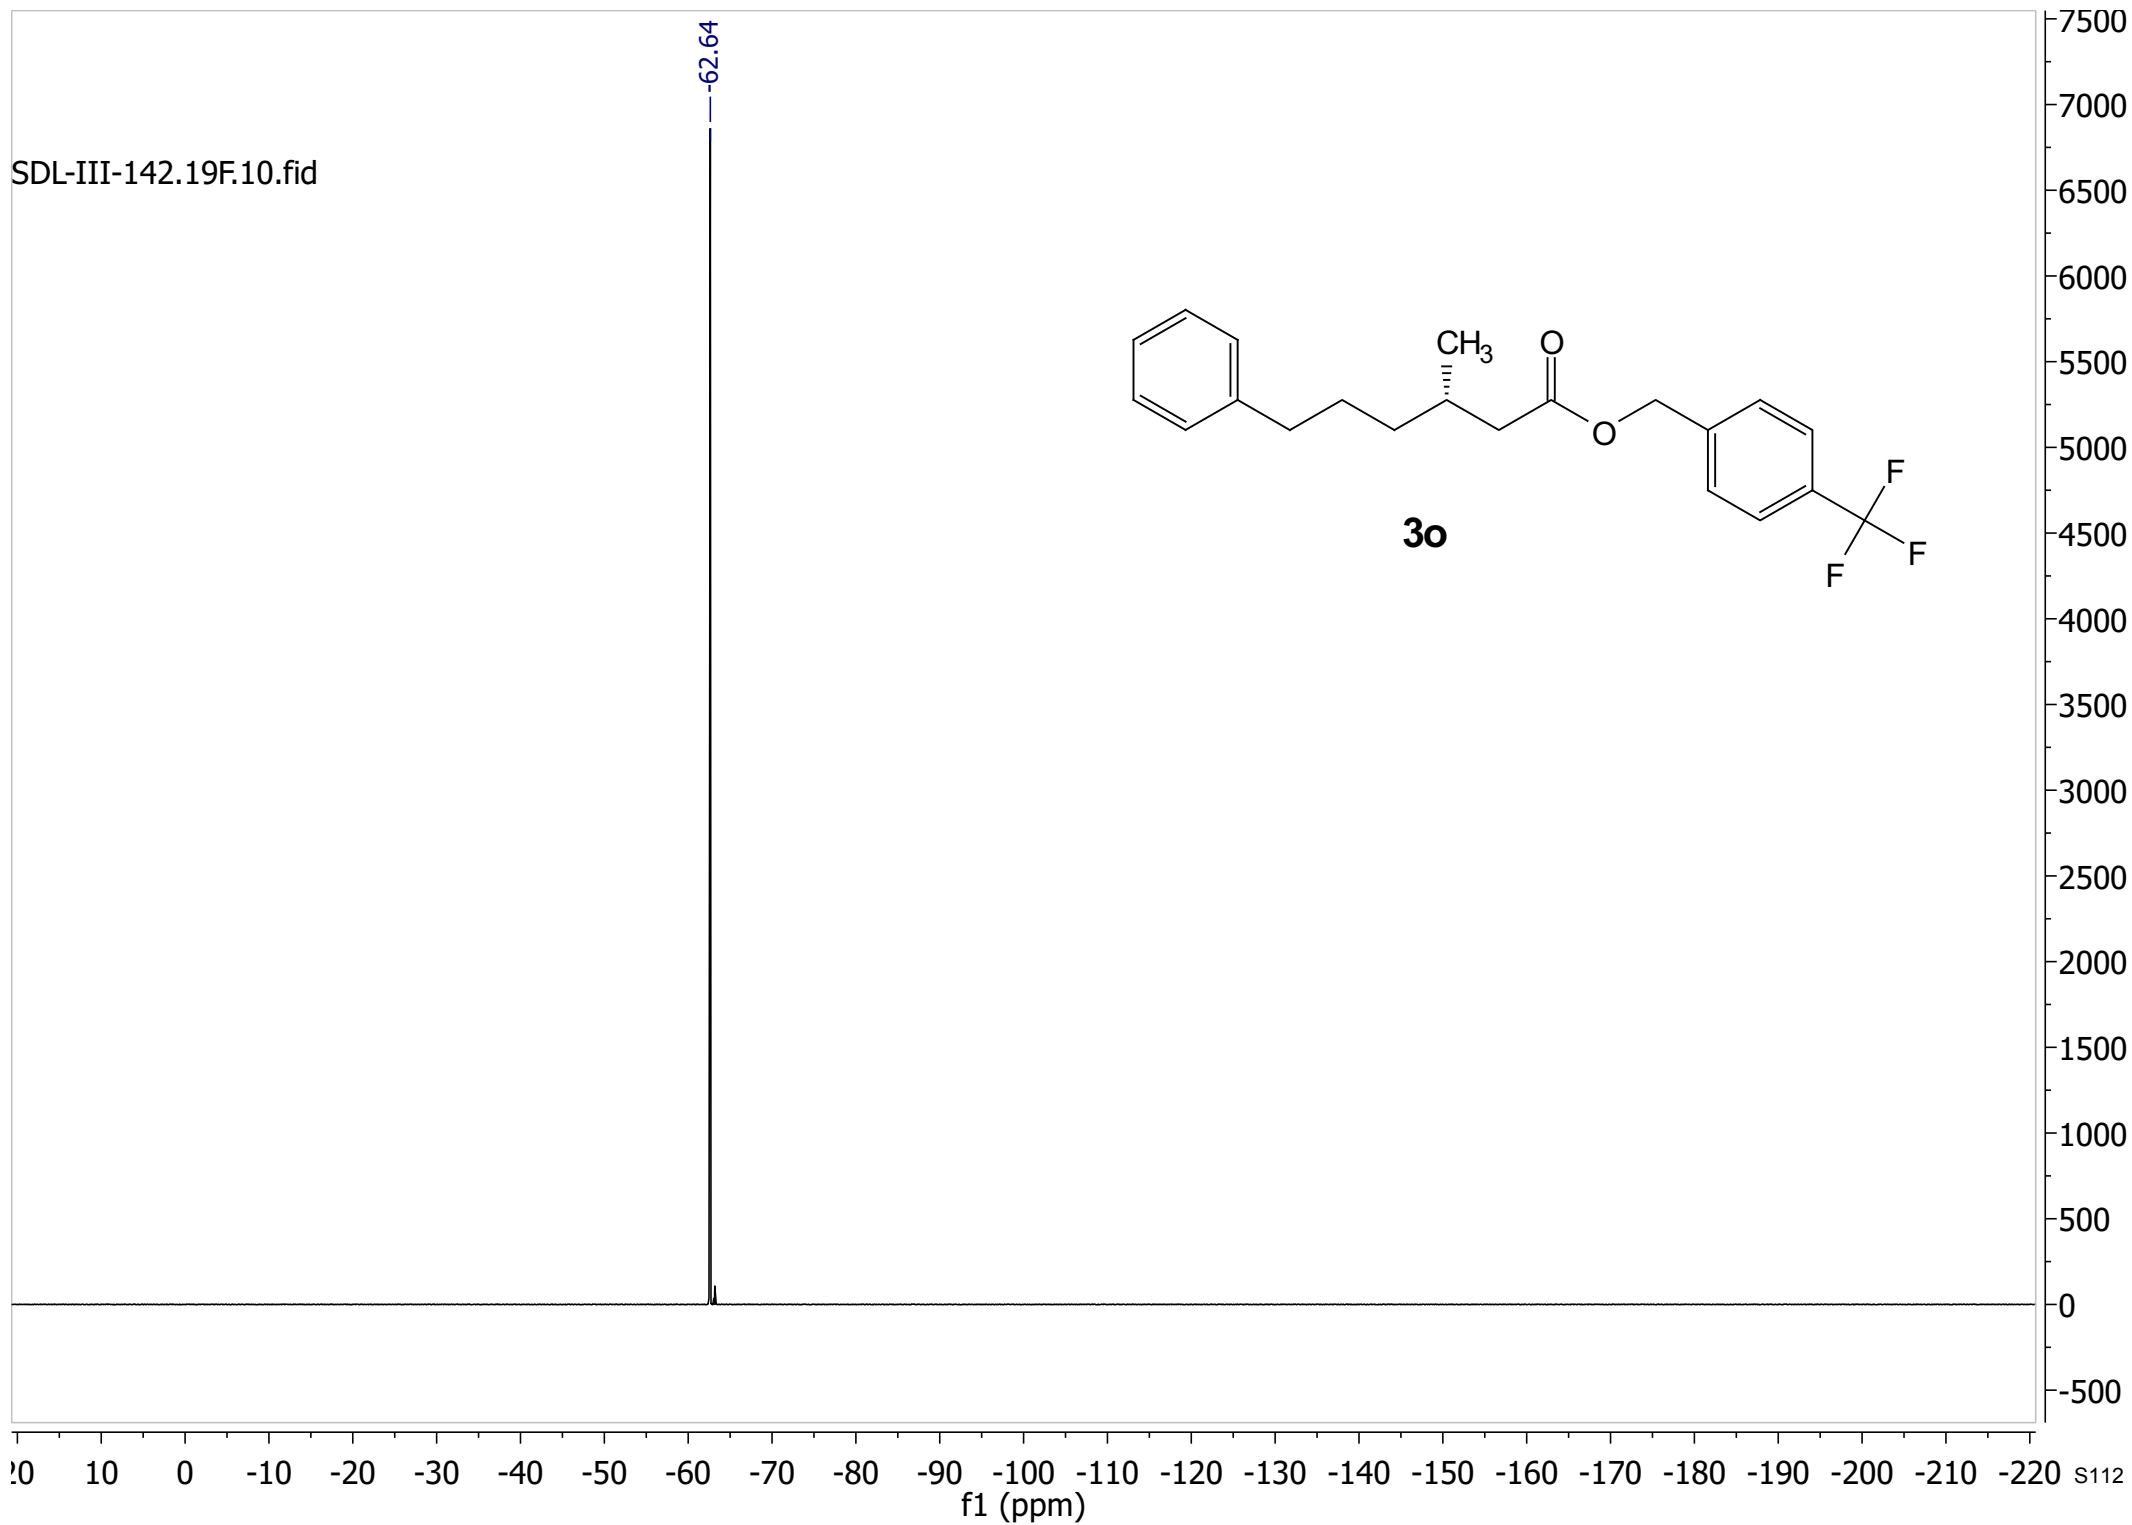



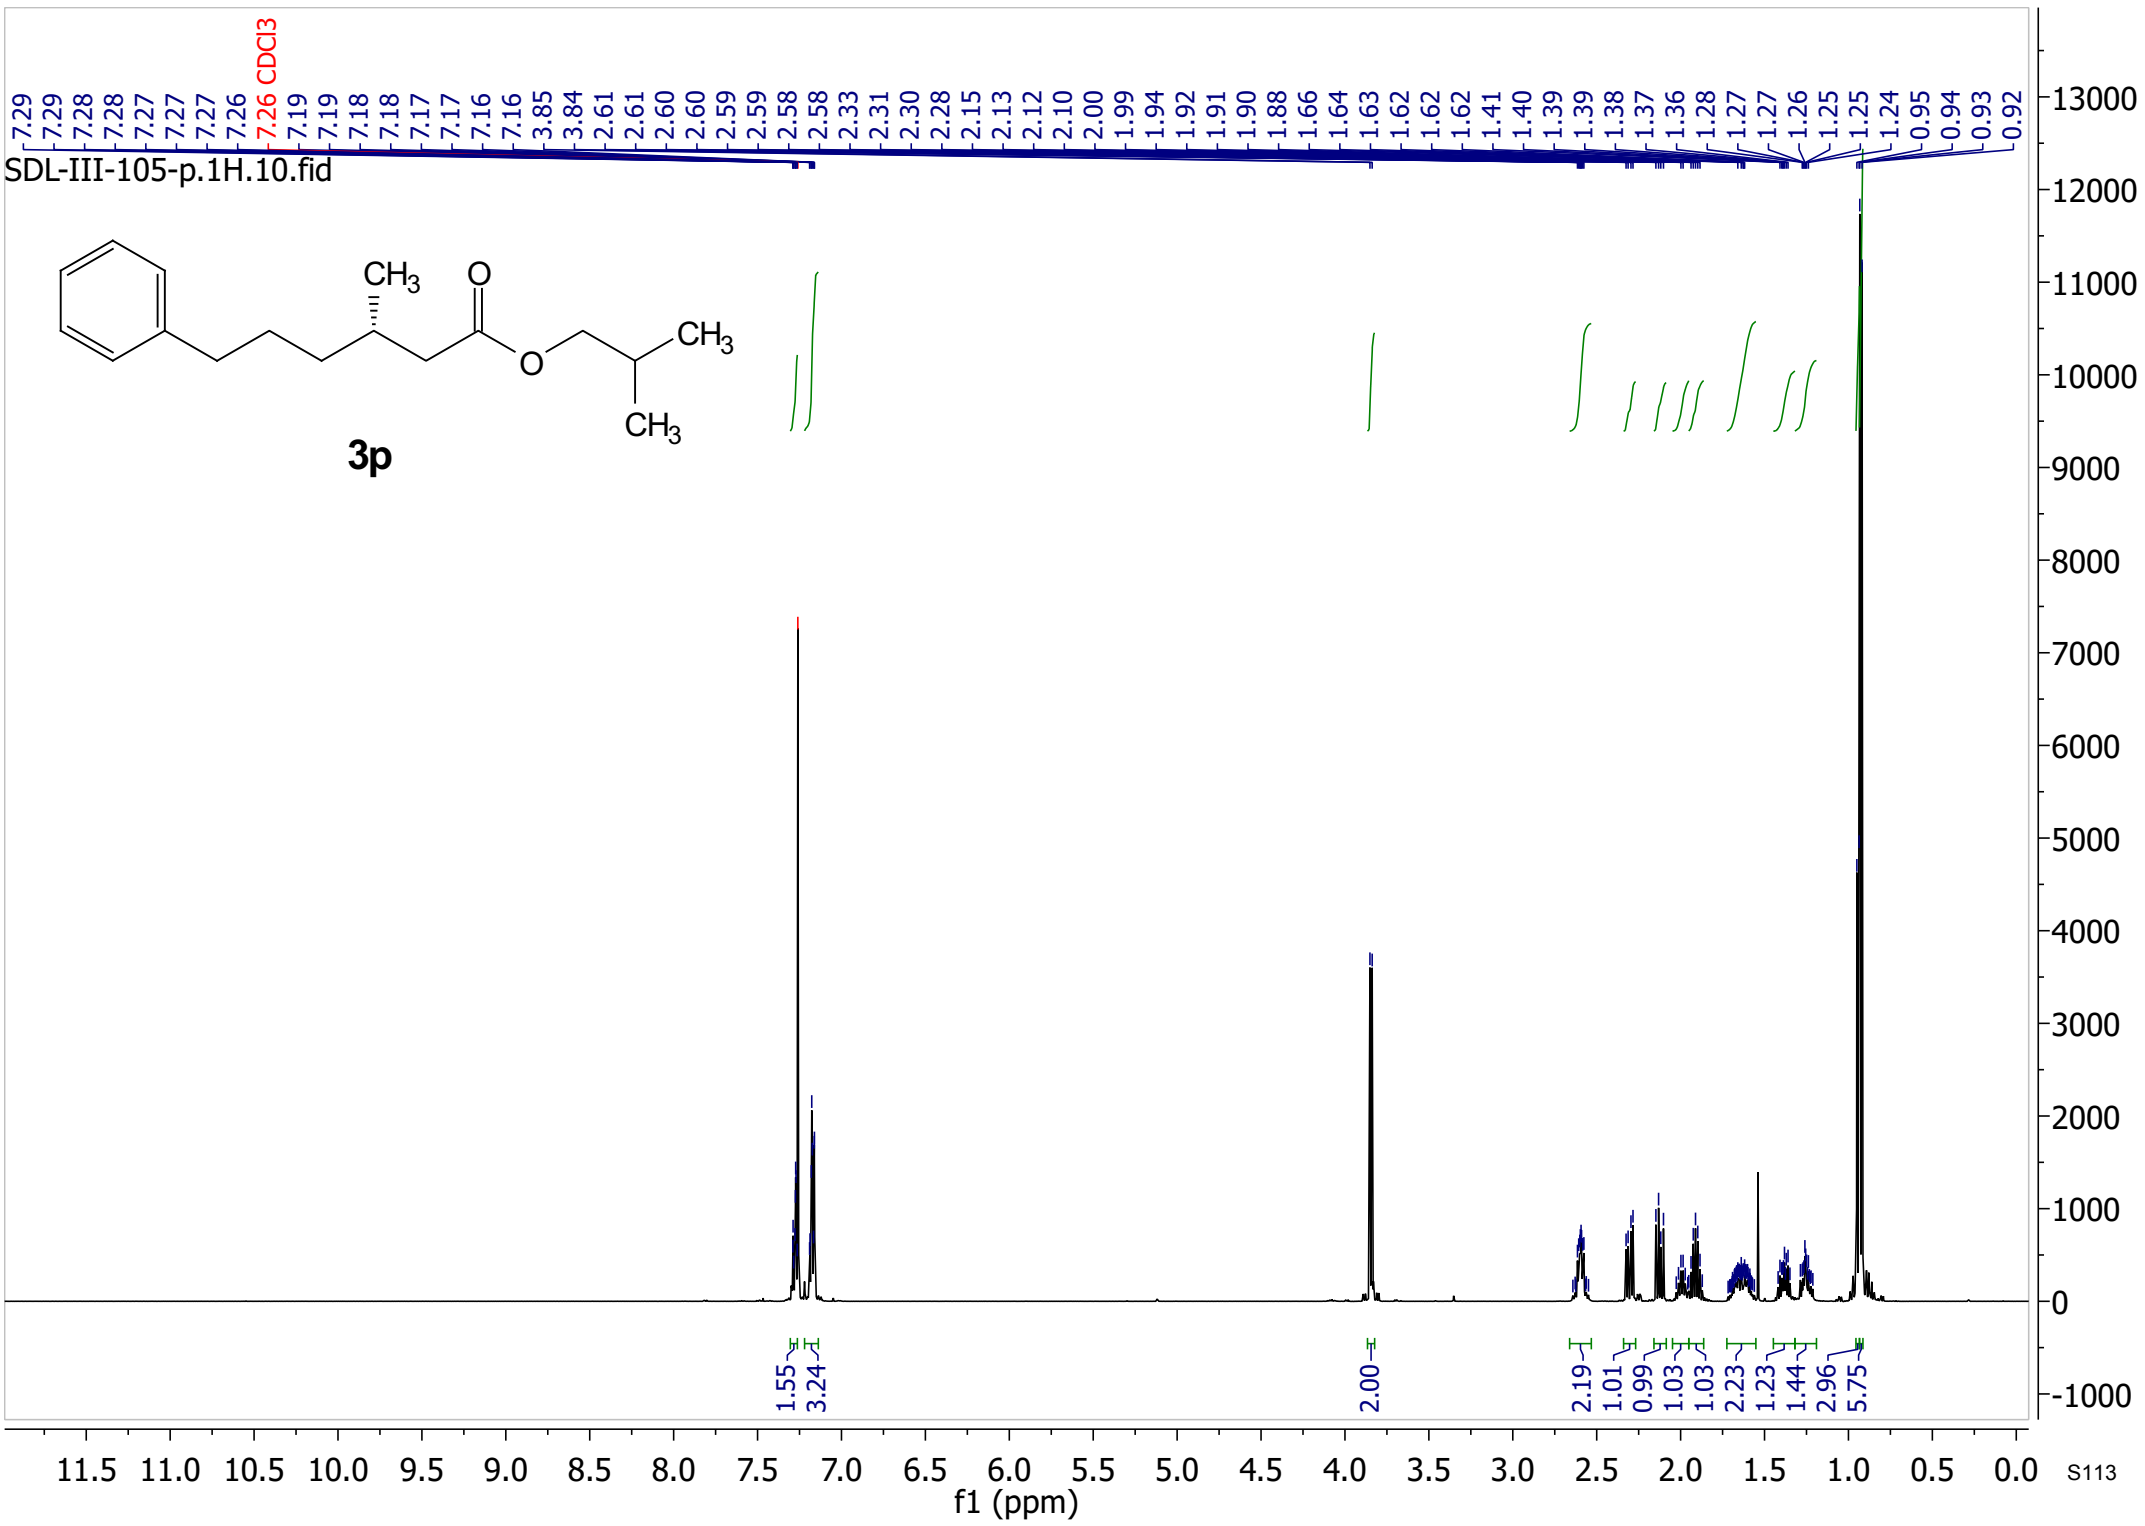

SDL-III-105-p.13C.10.fid

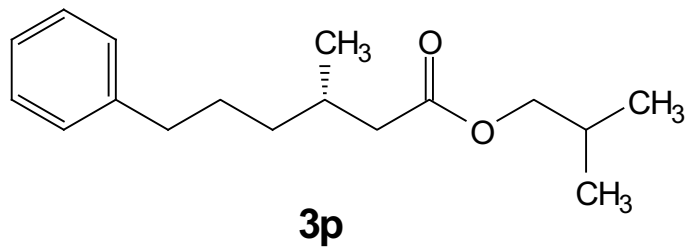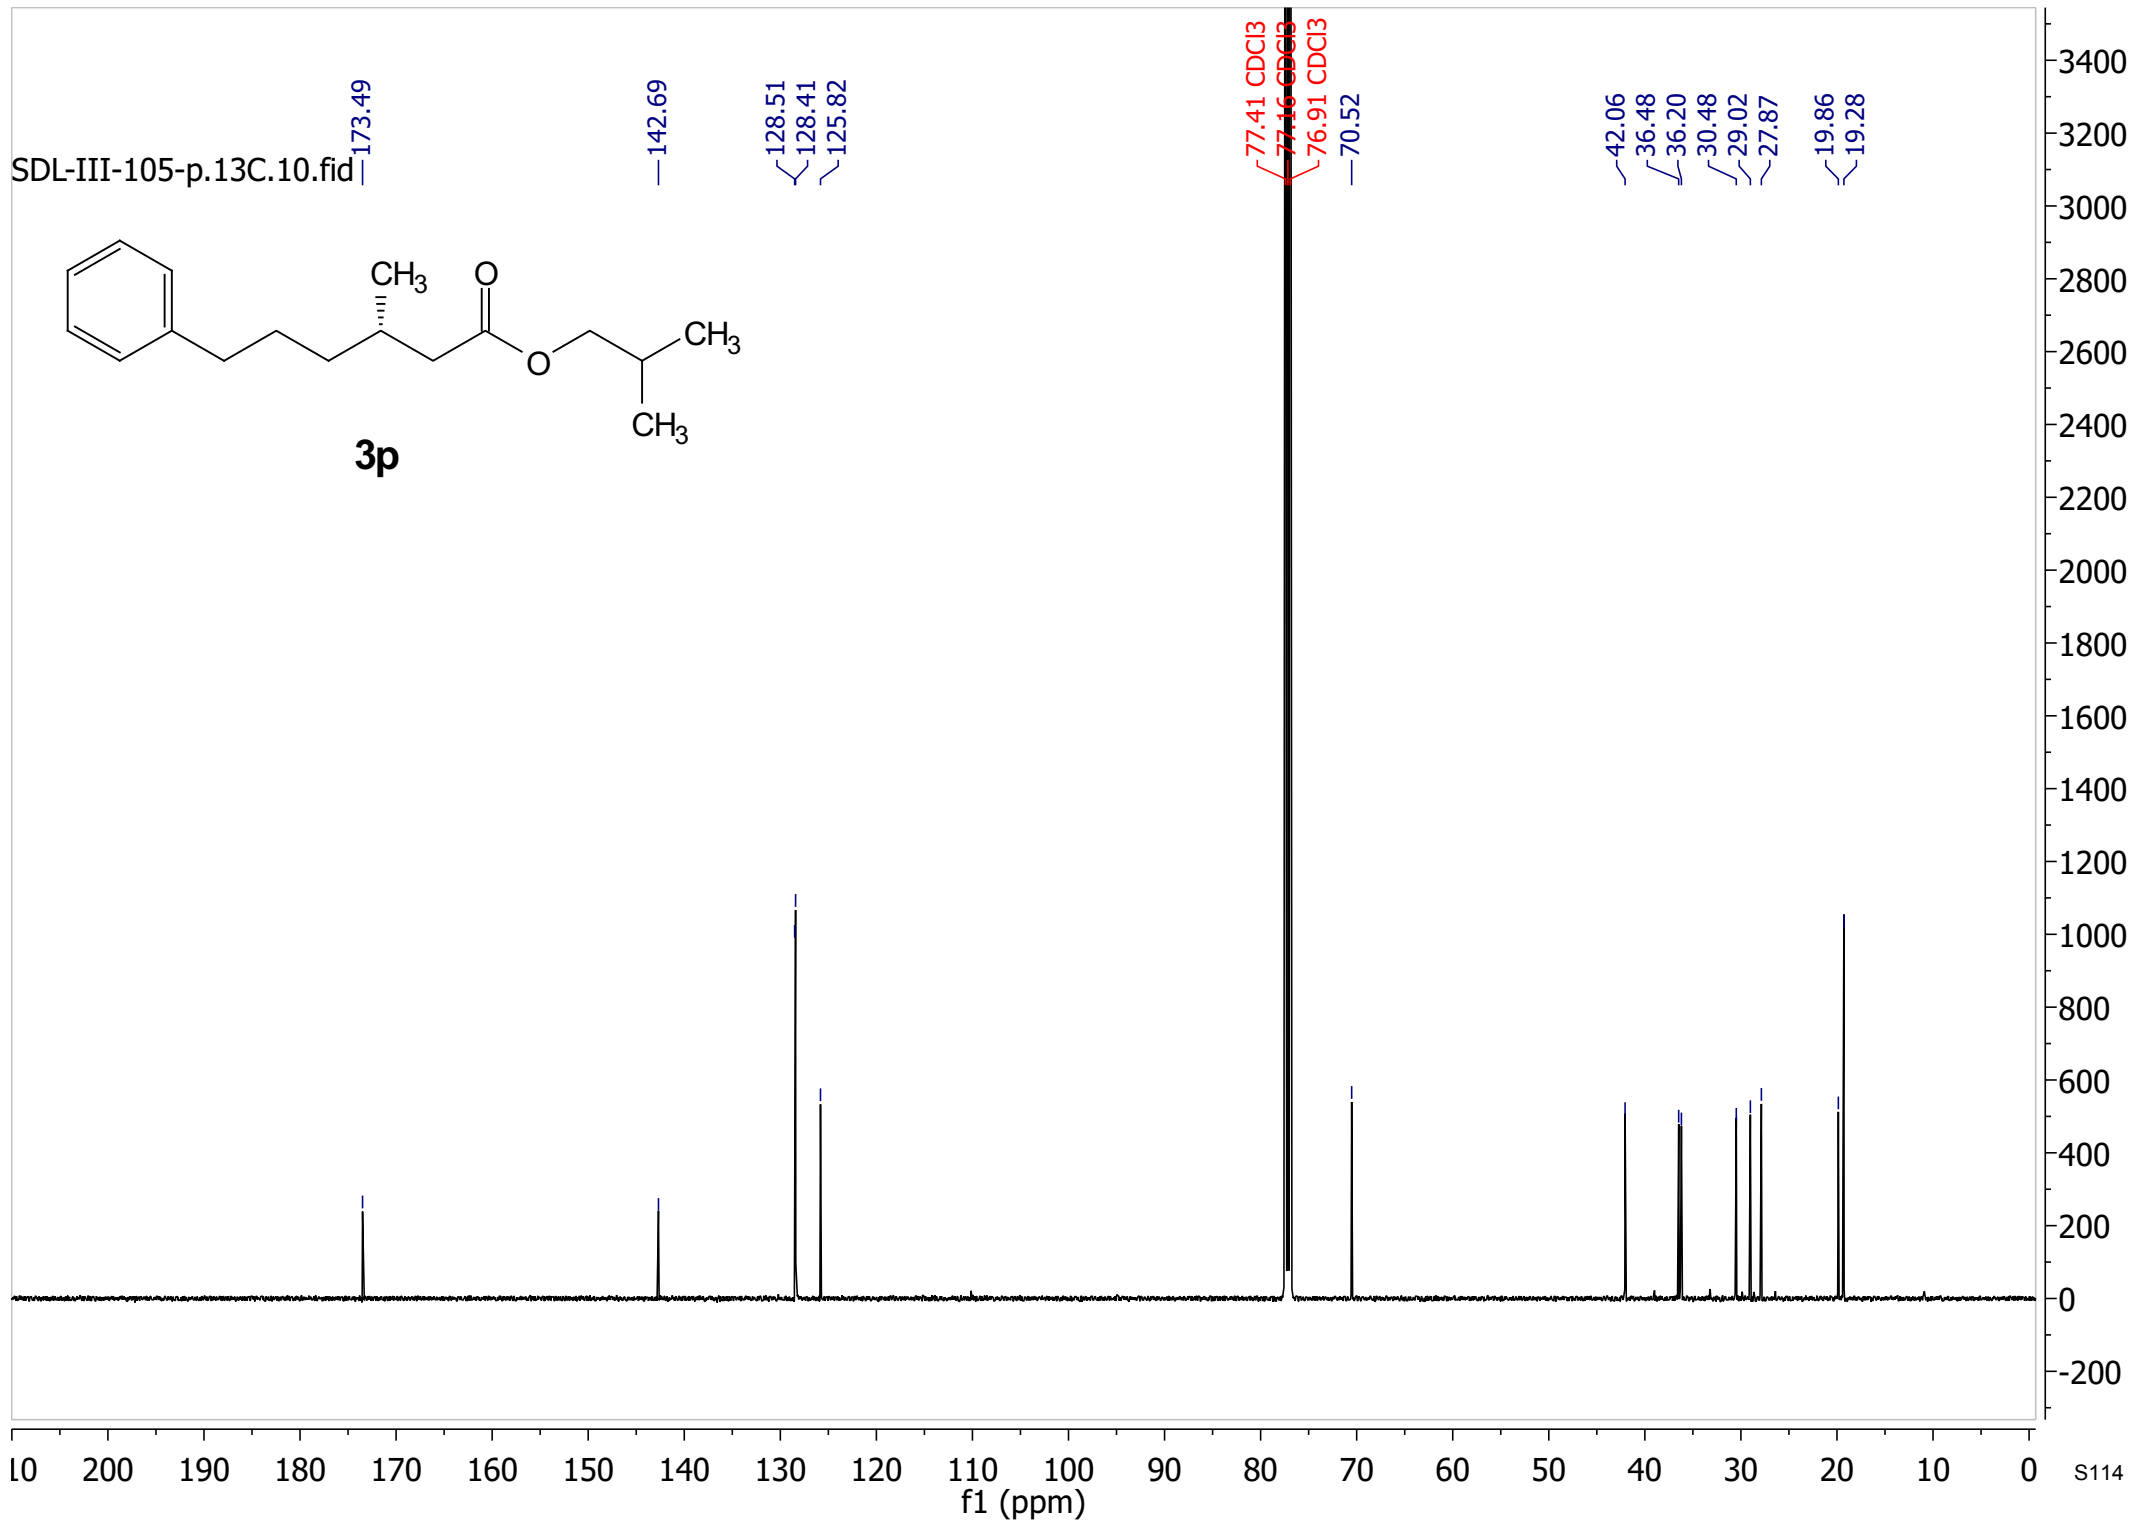

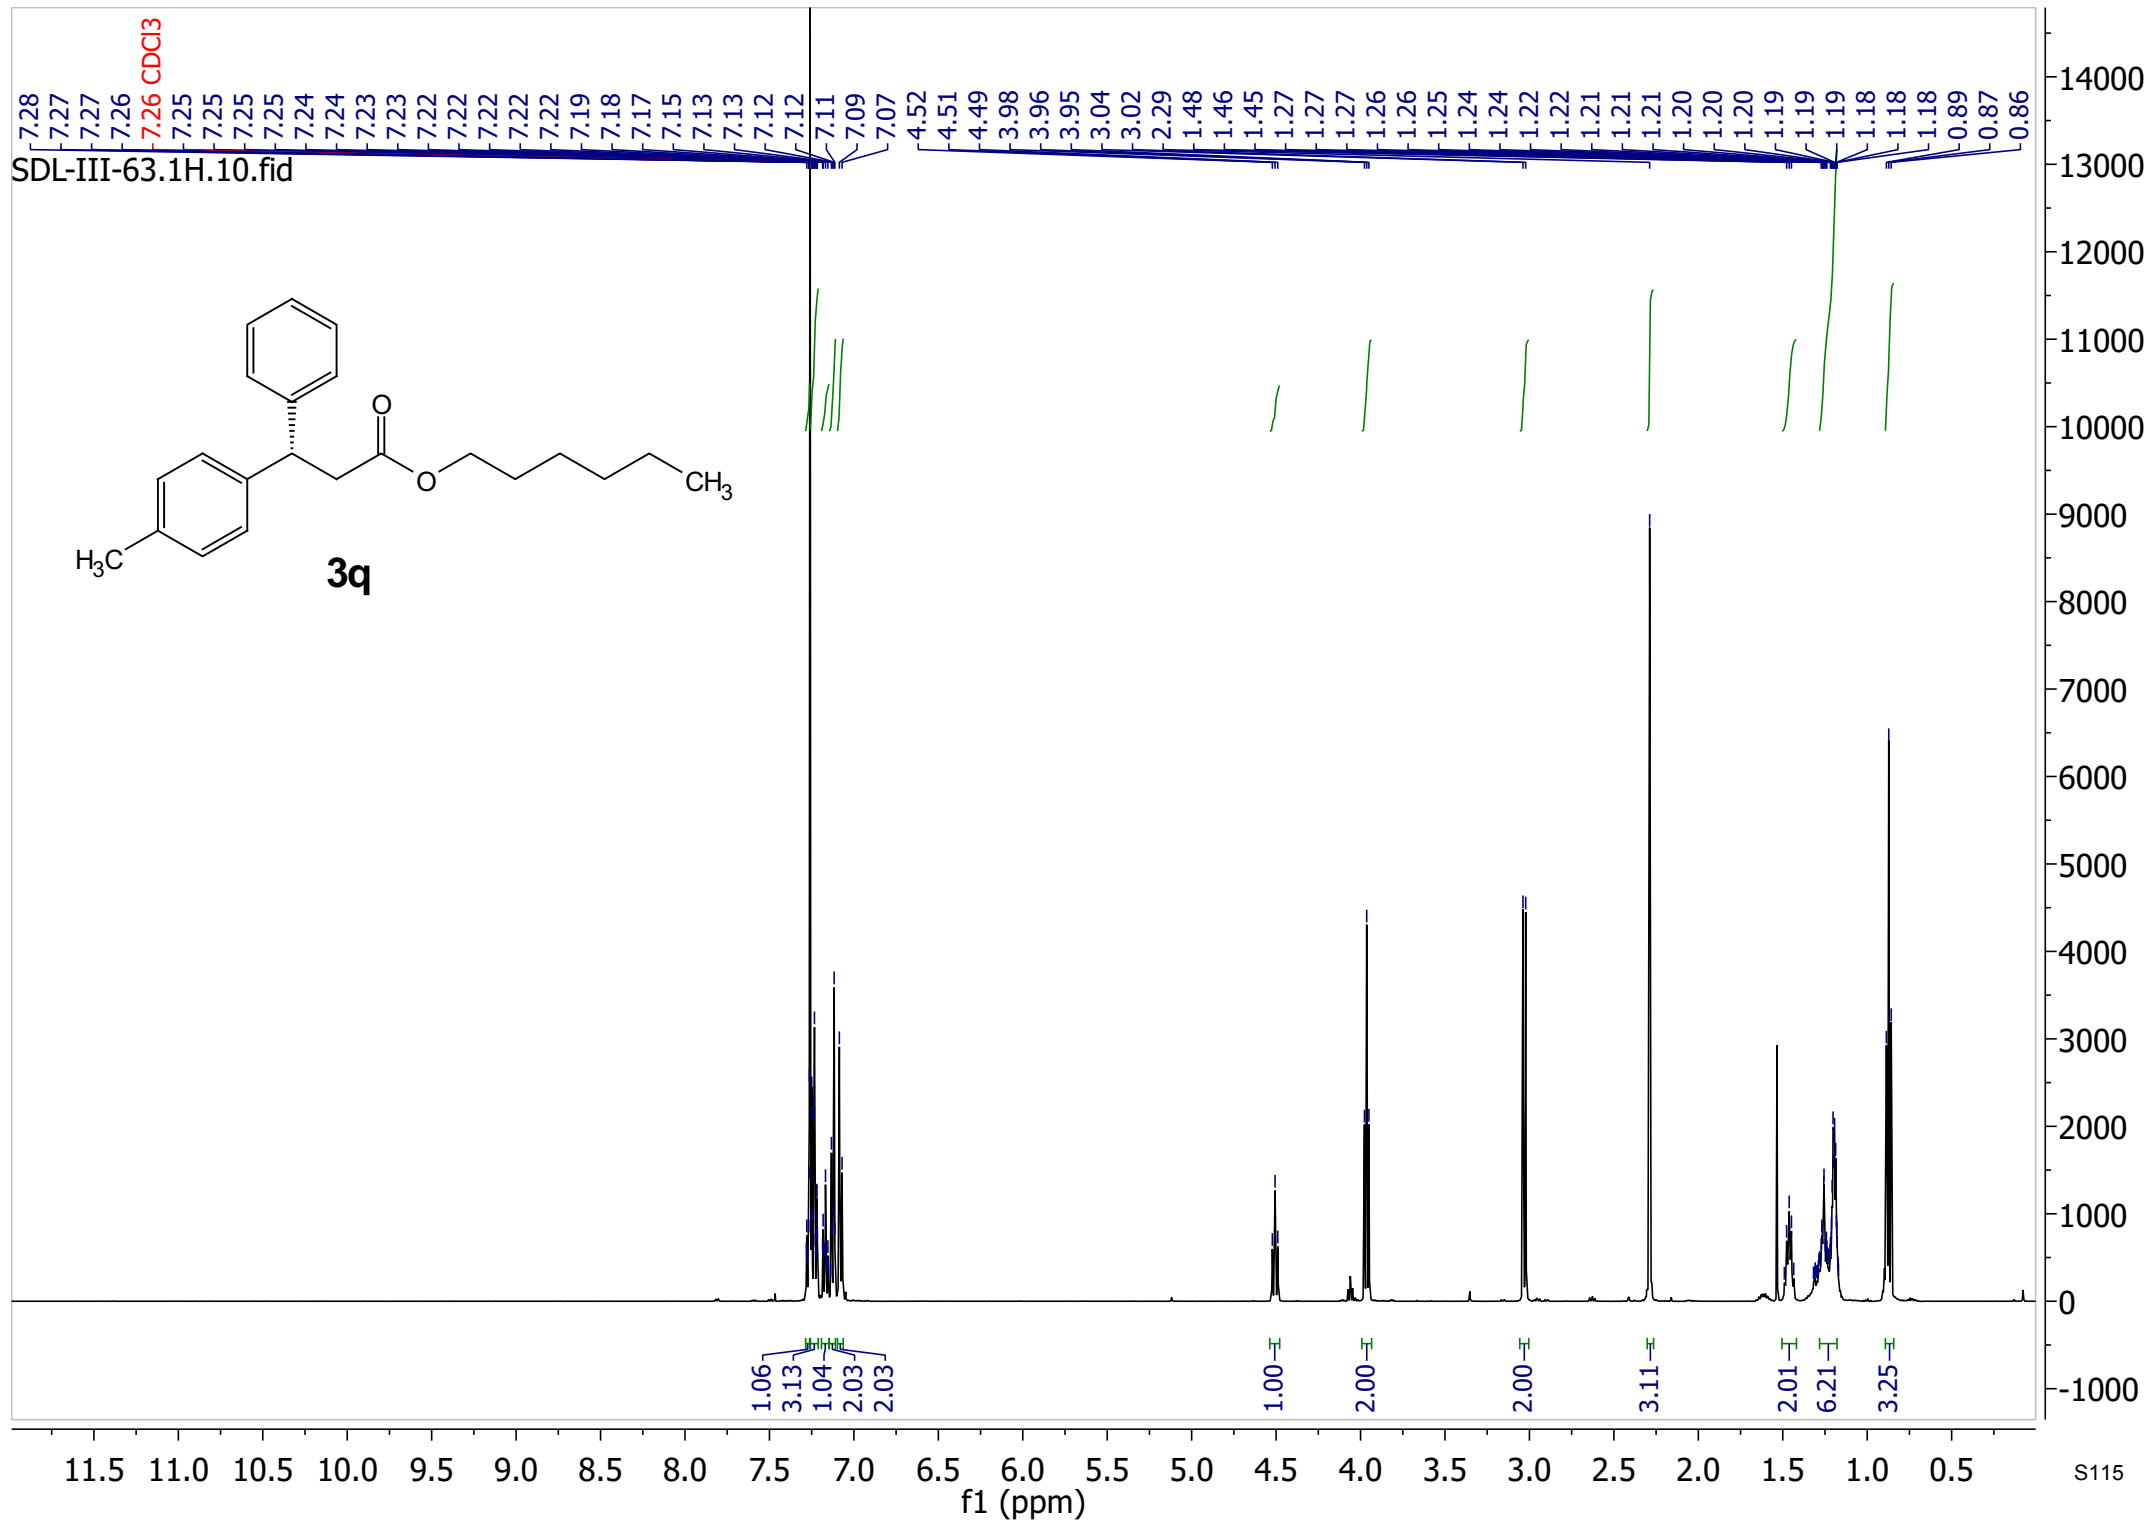

SDL-III-63.13C.10.fid

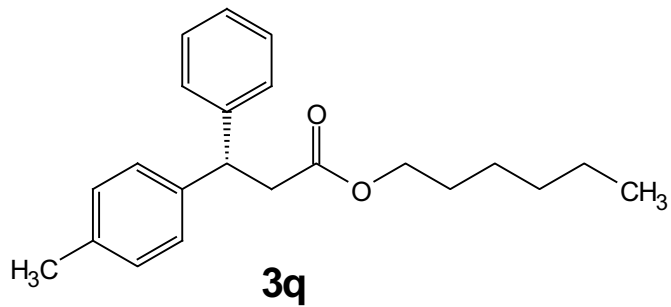

—172.12

—143.90

—140.67

—136.16

—129.36

—128.65

—127.76

—127.66

—126.57

77.41 CDC13

77.16 CDC13

76.91 CDC13

—64.77

—46.89

—41.09

—31.55

—28.66

—25.63

—22.66

—21.13

—14.17

200 190 180 170 160 150 140 130 120 110 100 90 80 70 60 50 40 30 20 10 0 f1 (ppm) s116

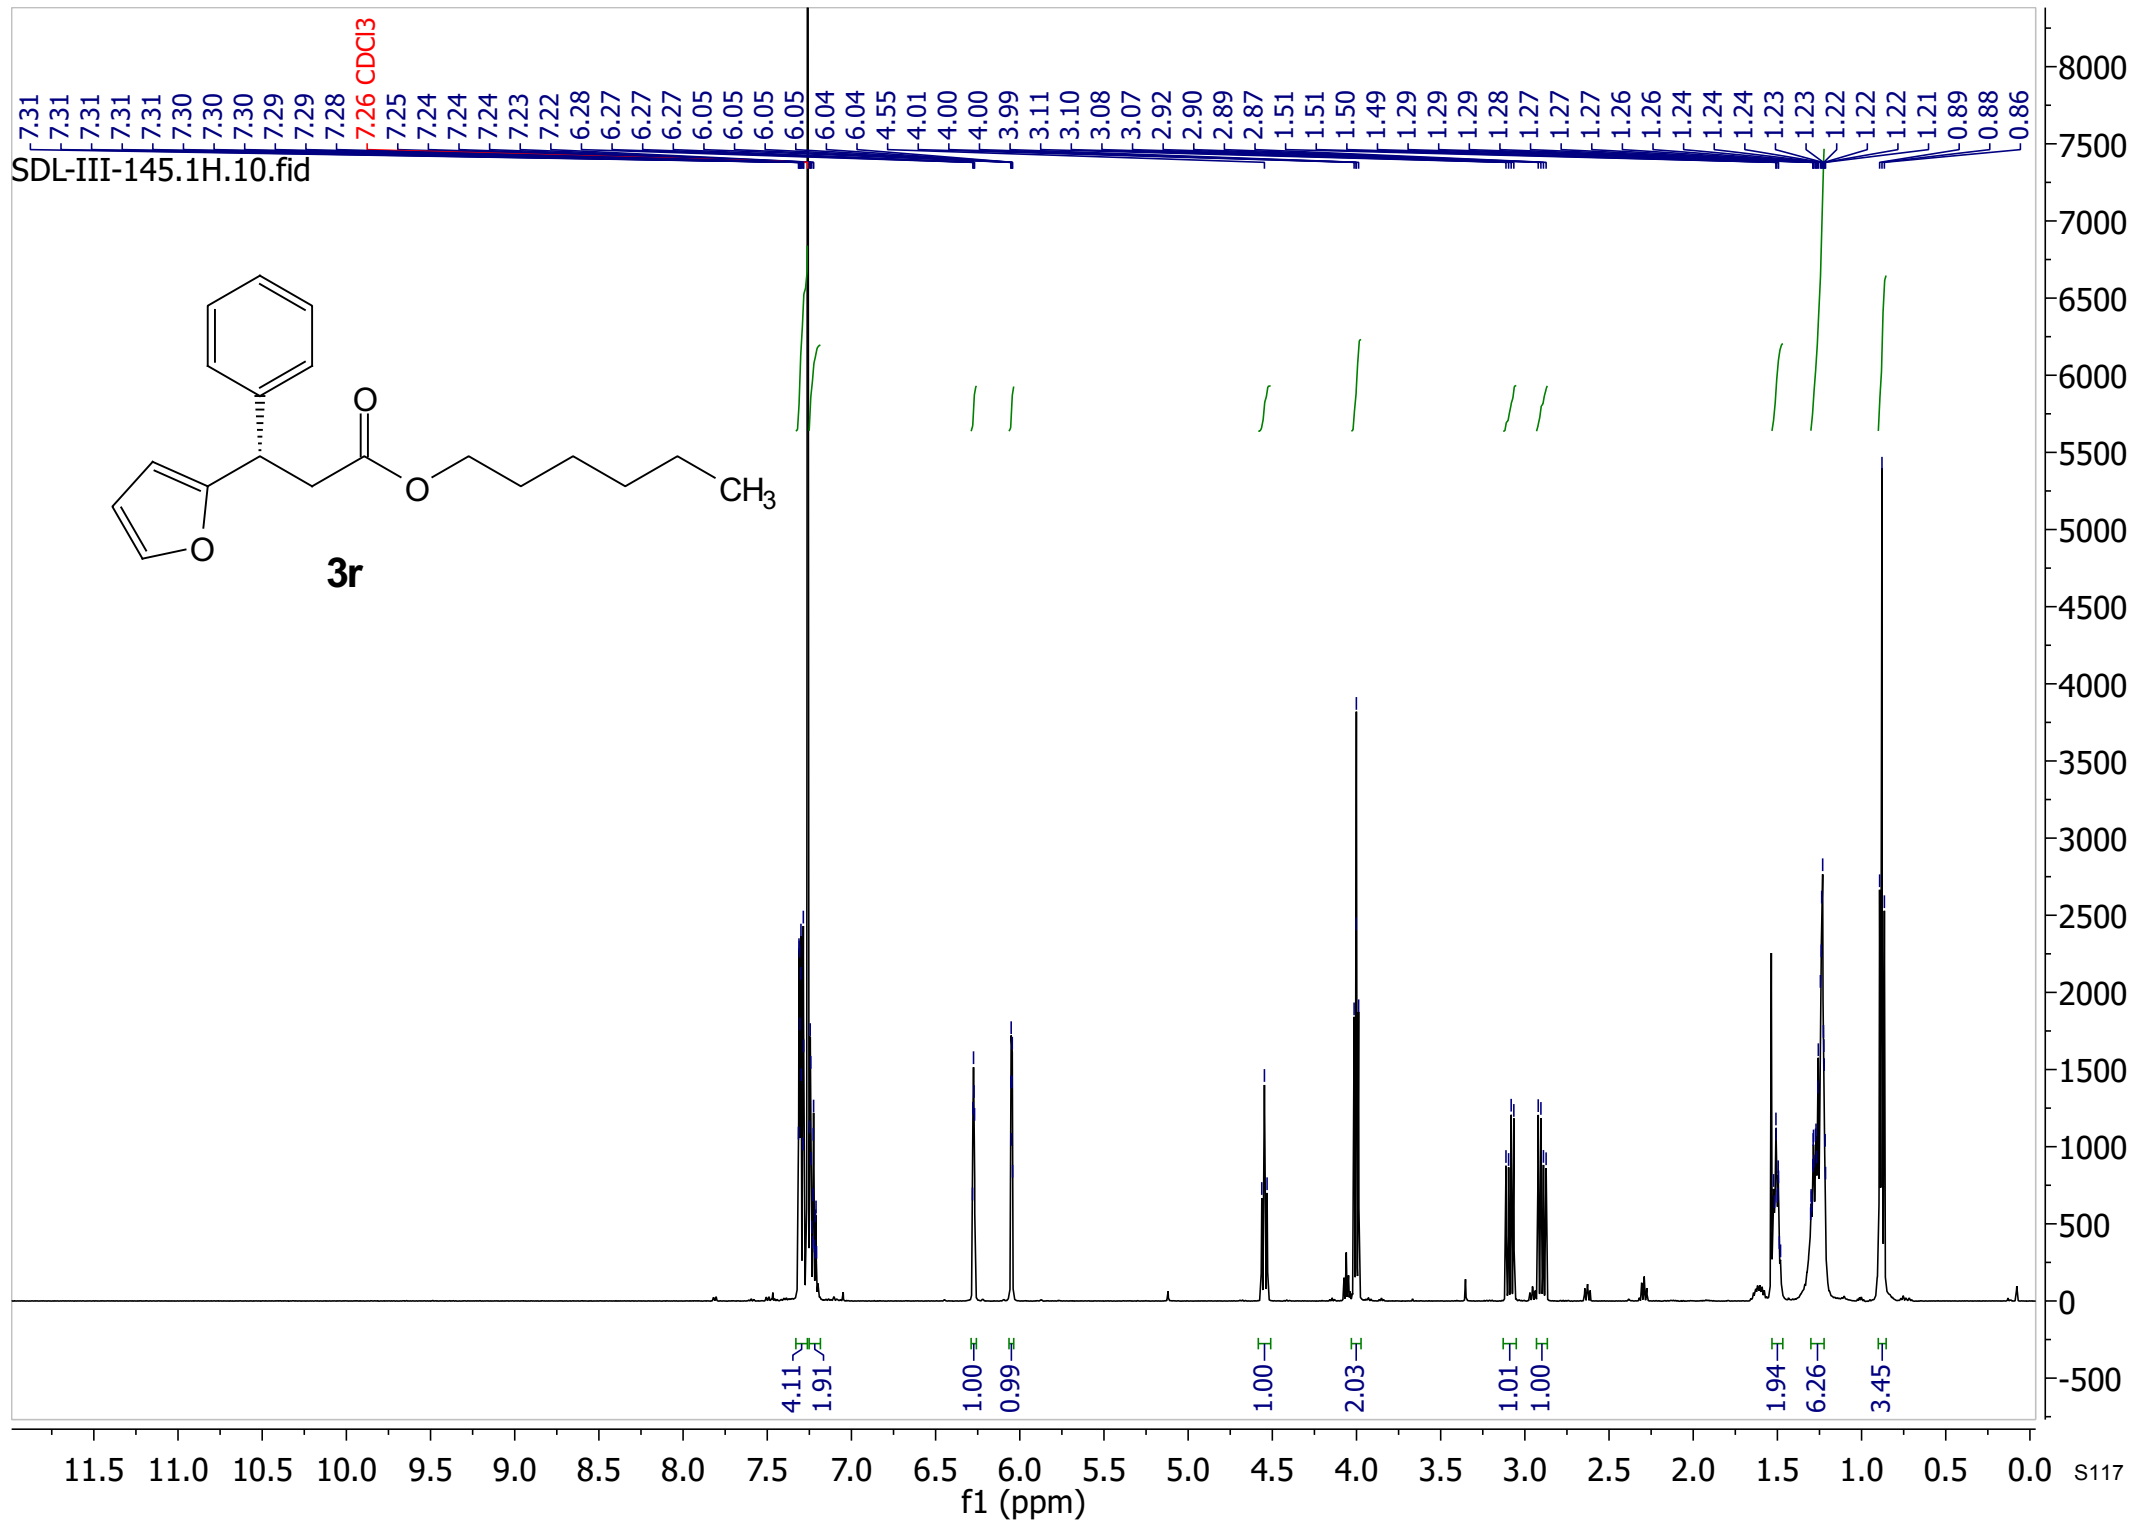

SDL-III-145.13C.10.fid

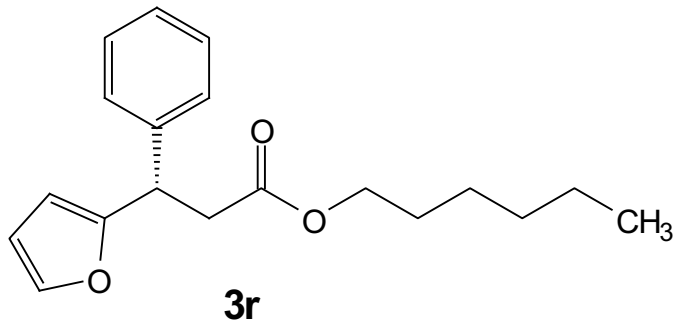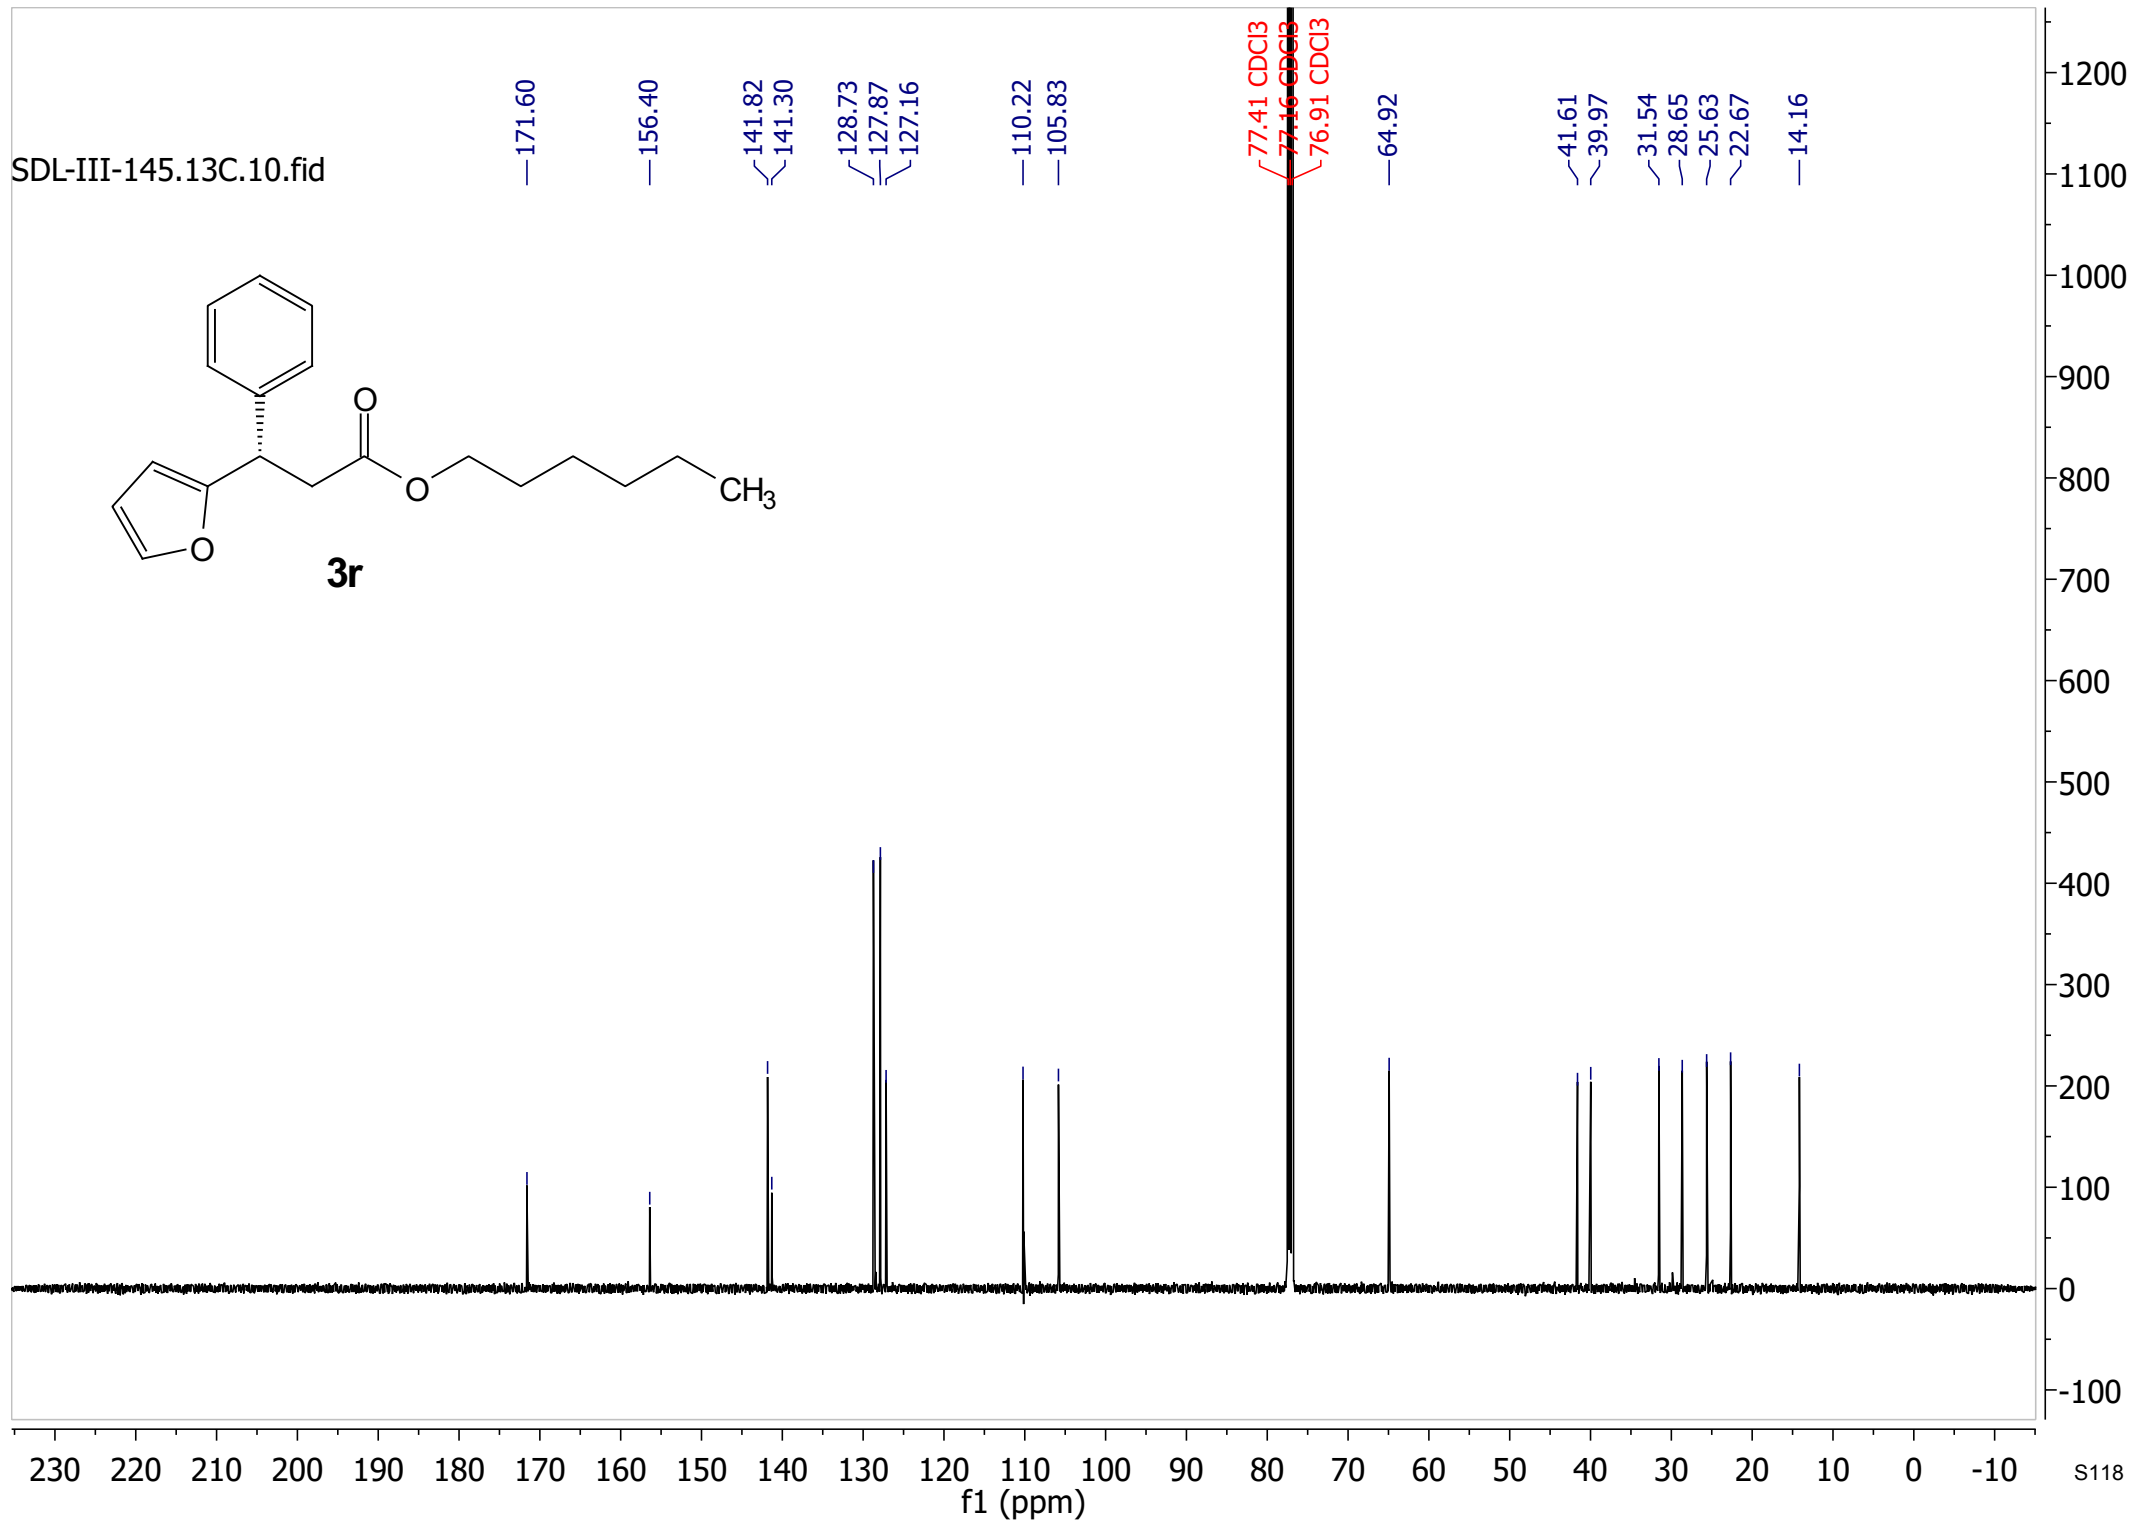

SDL-III-71.1H.10.fid

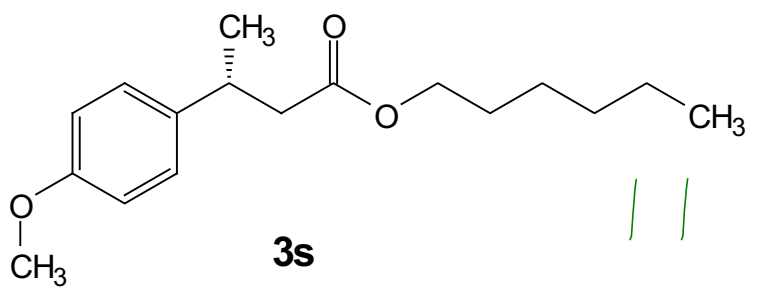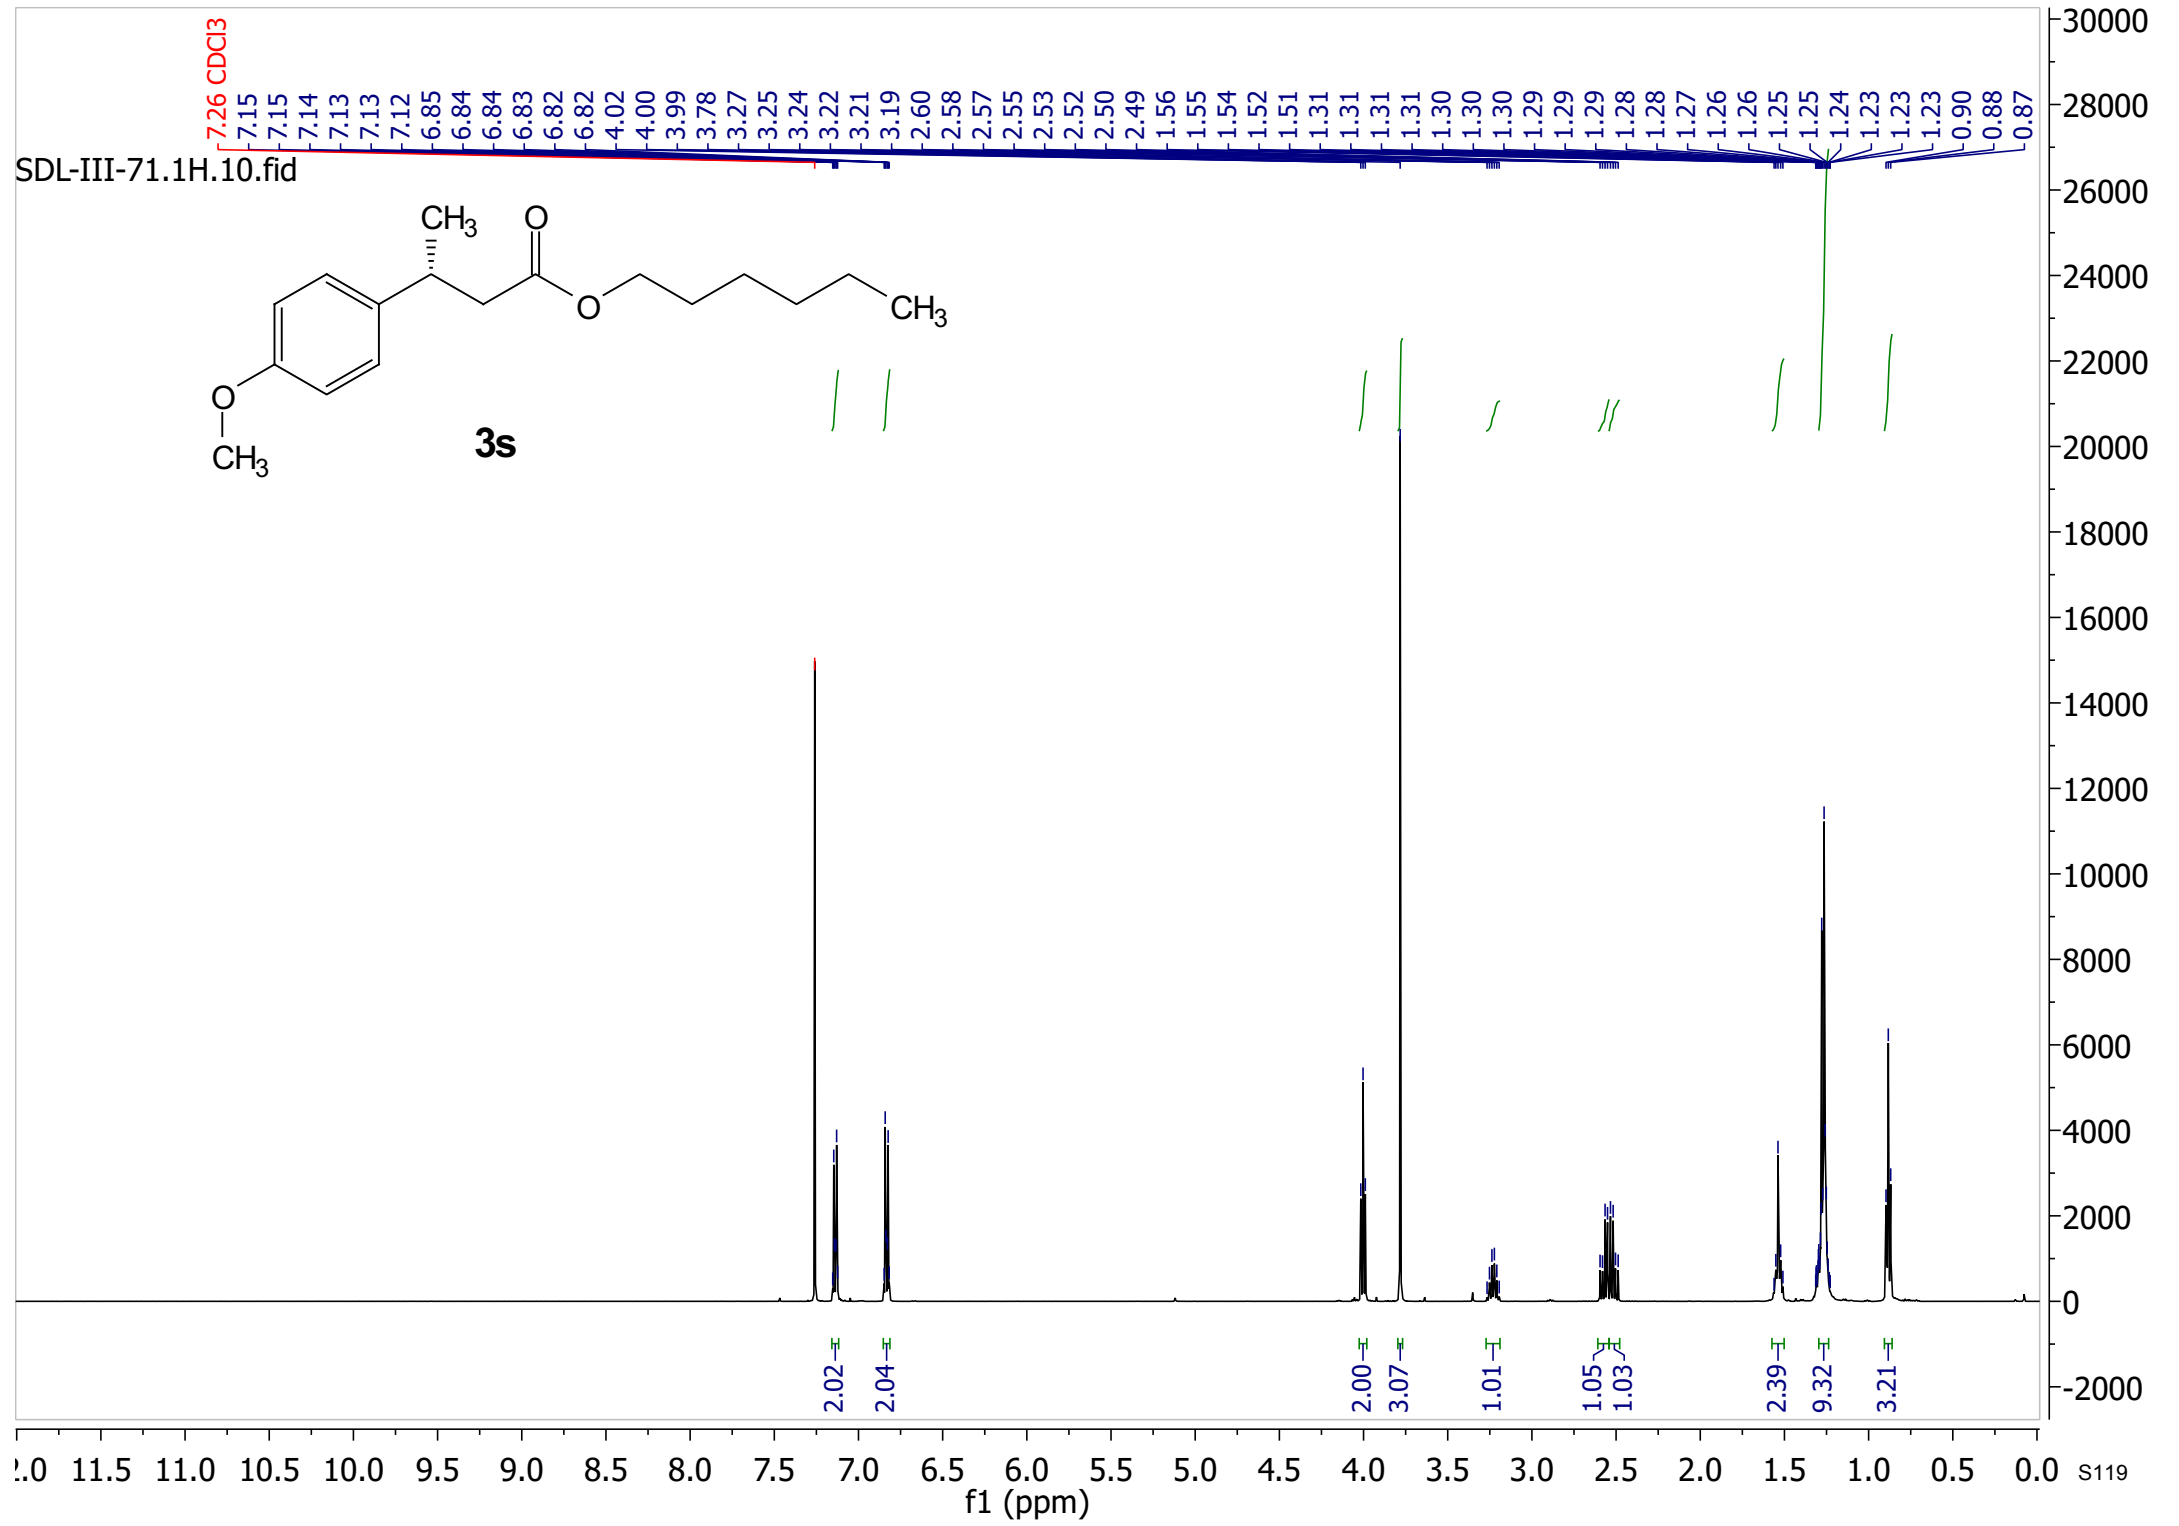

SDL-III-71.13C.10.fid

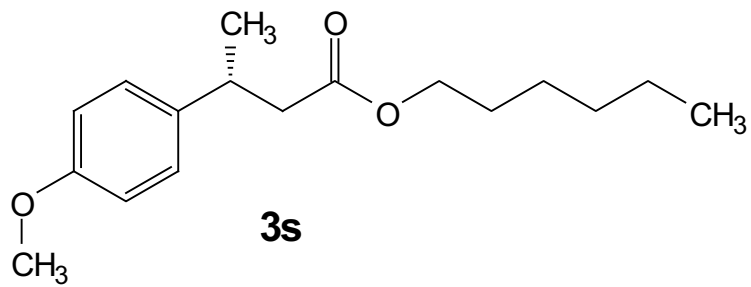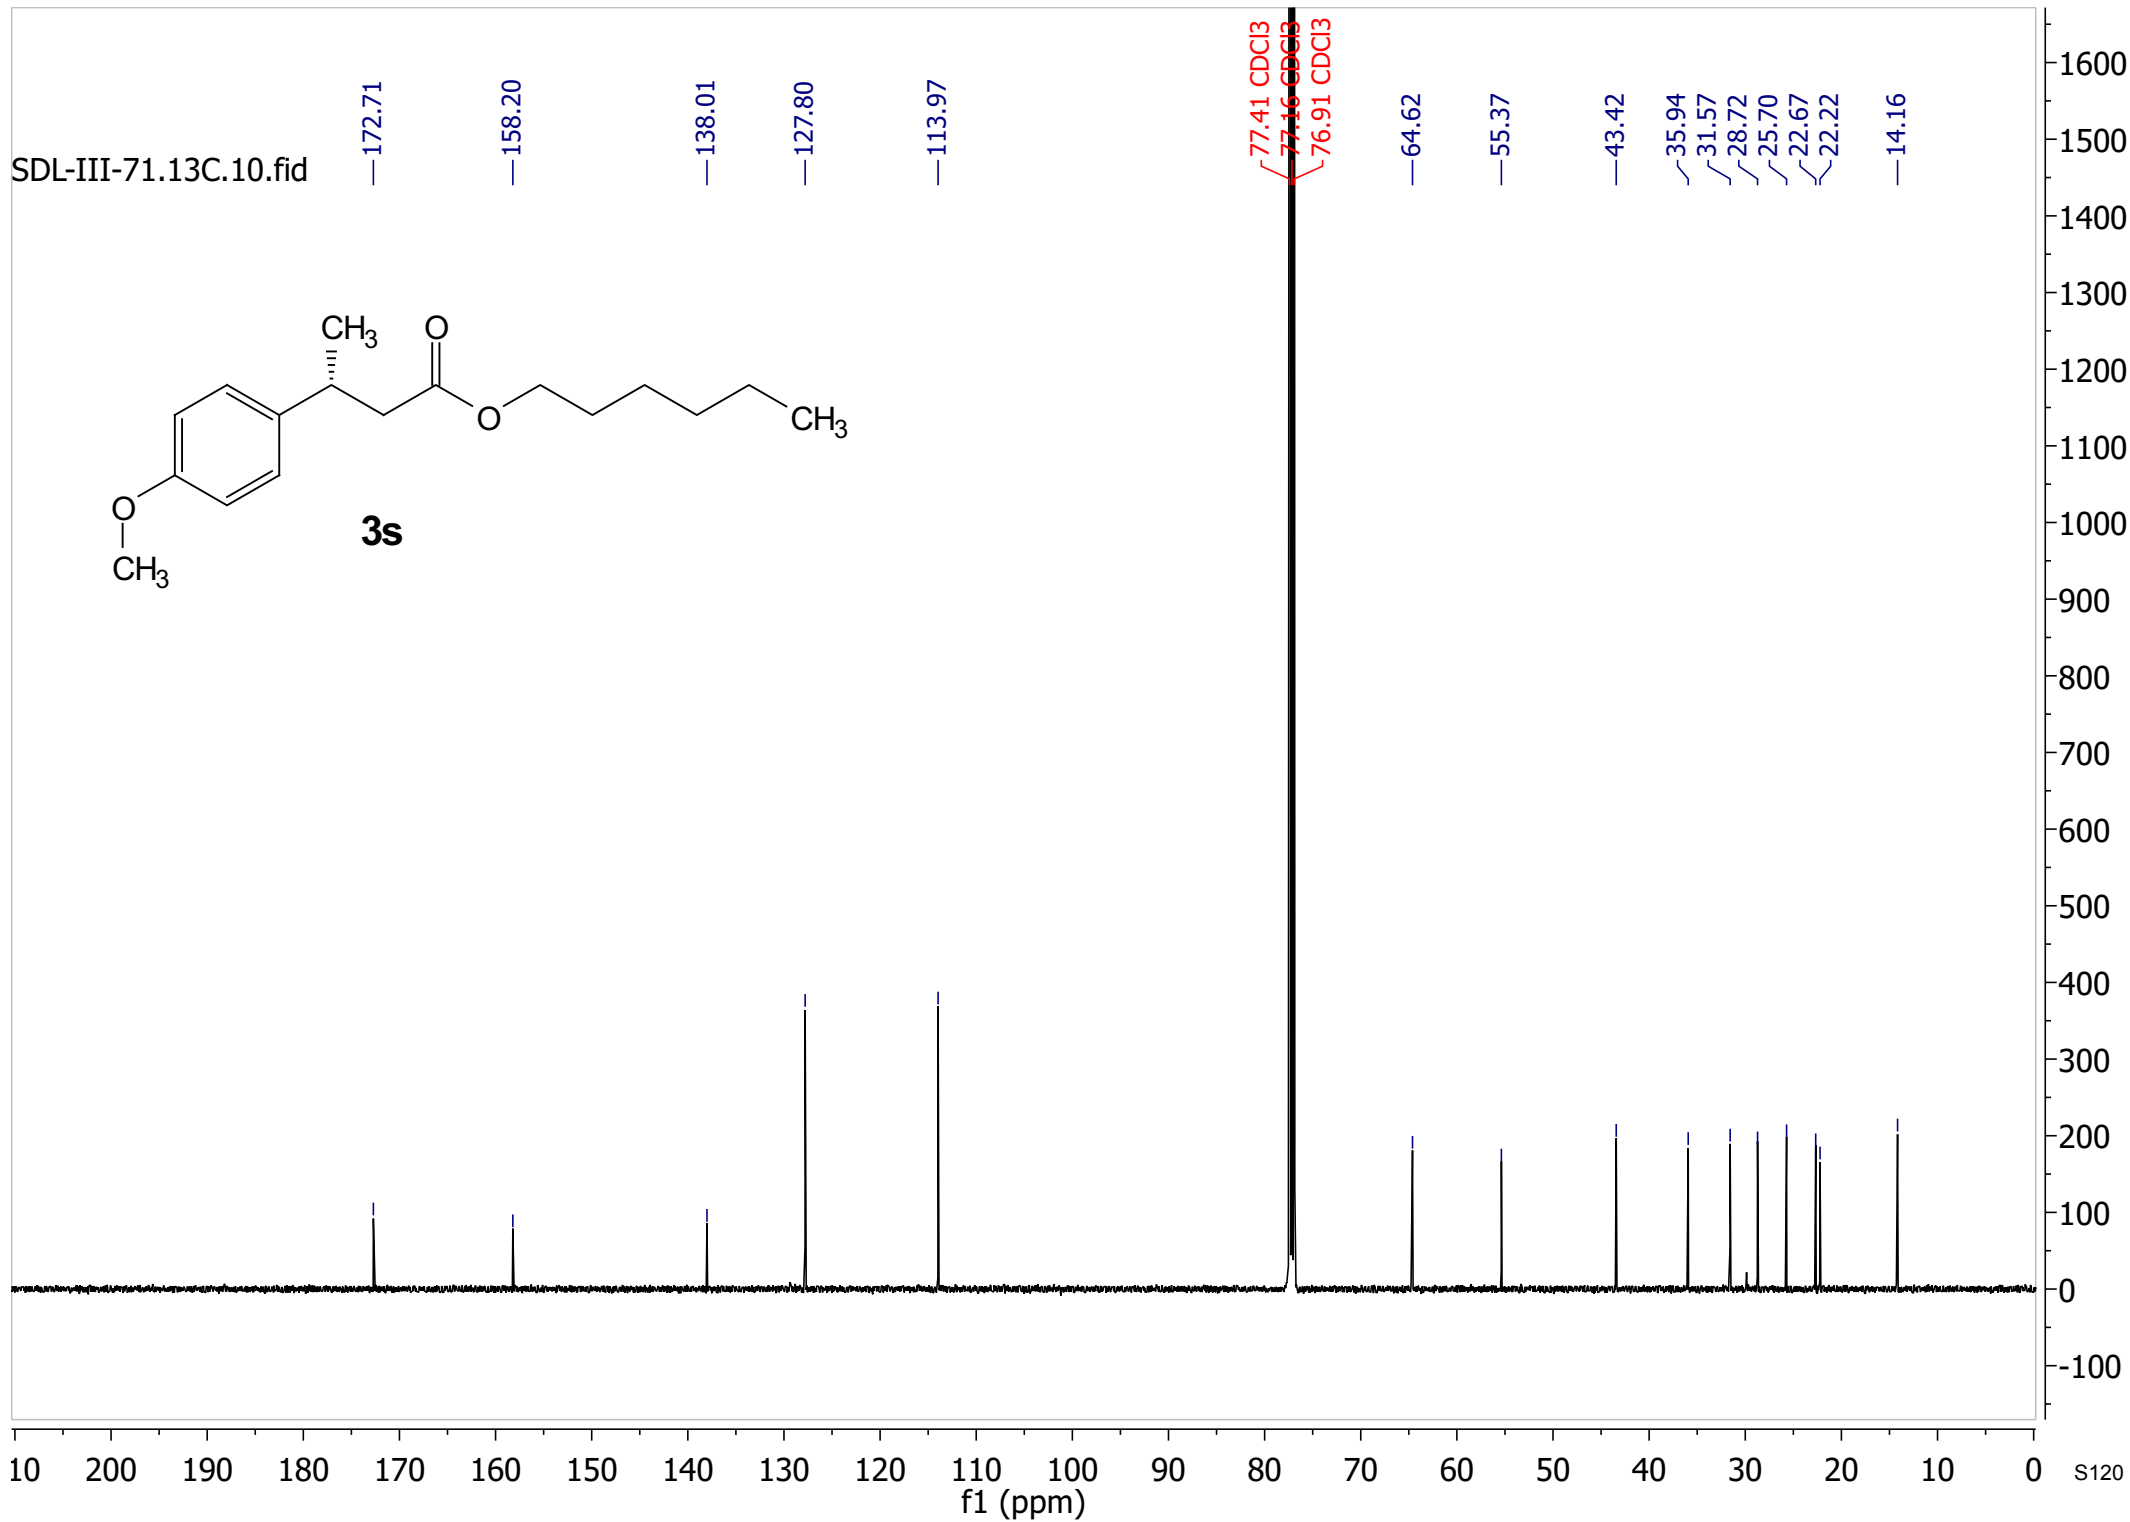



SDL-III-229-p.1H.10.fid

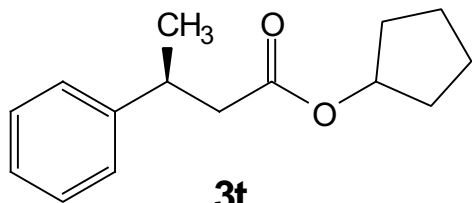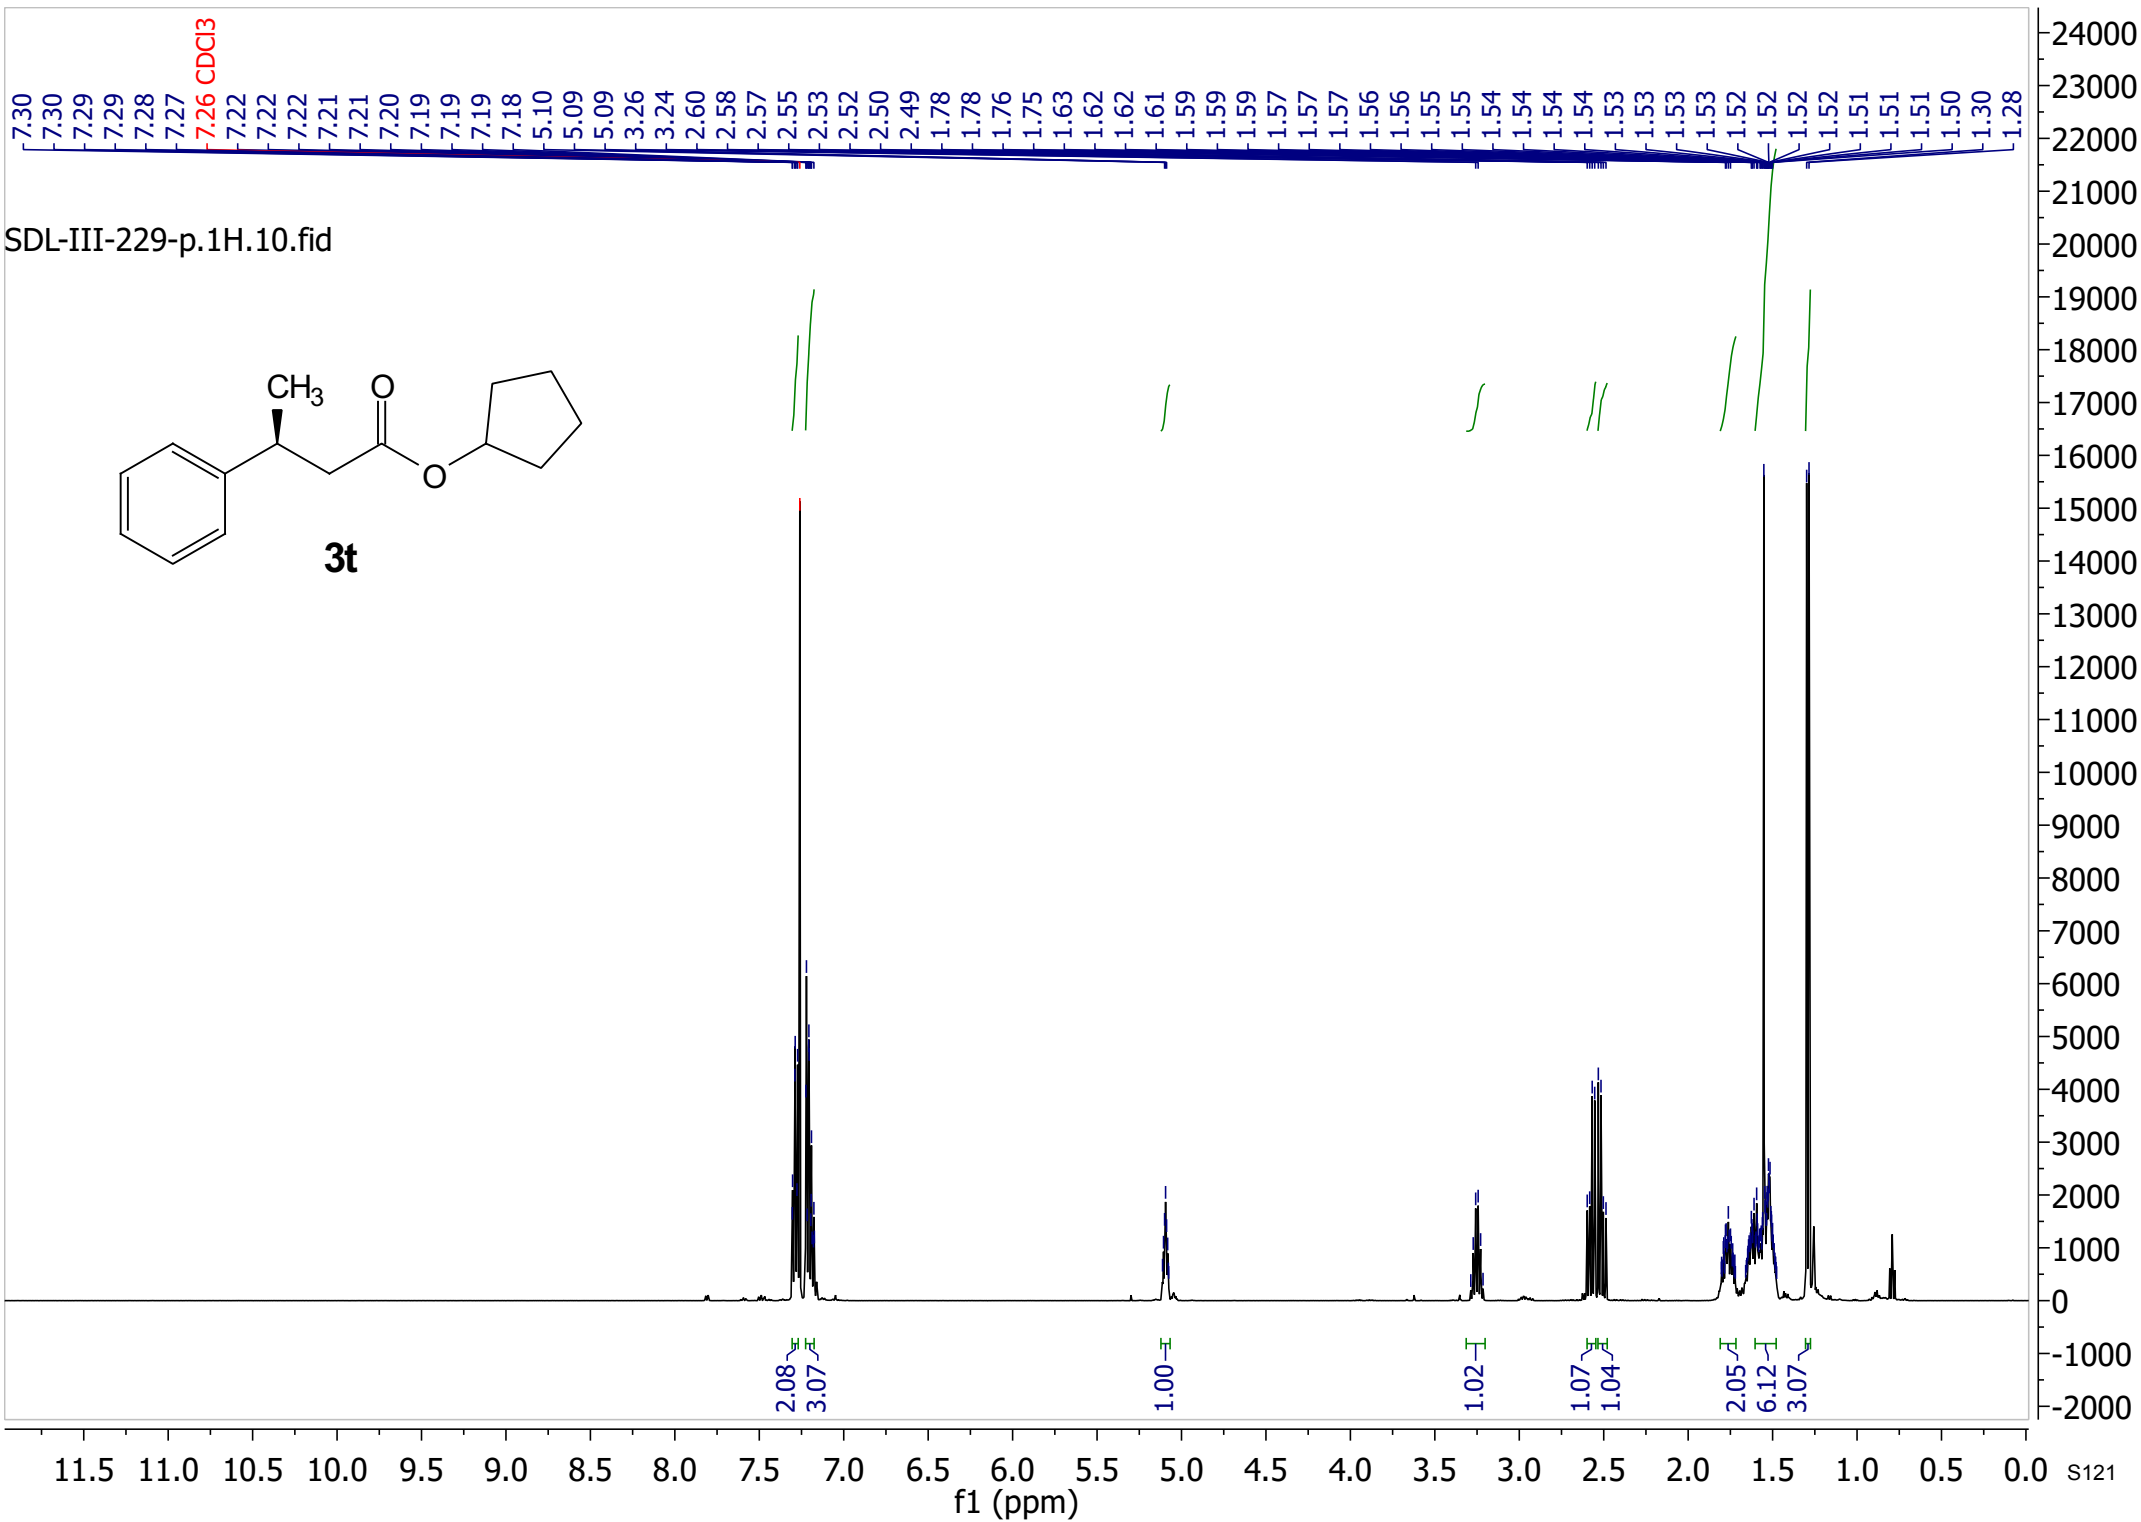

SDL-III-229-p.13C.10.fid

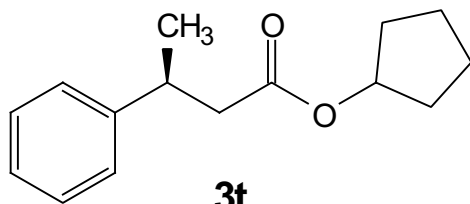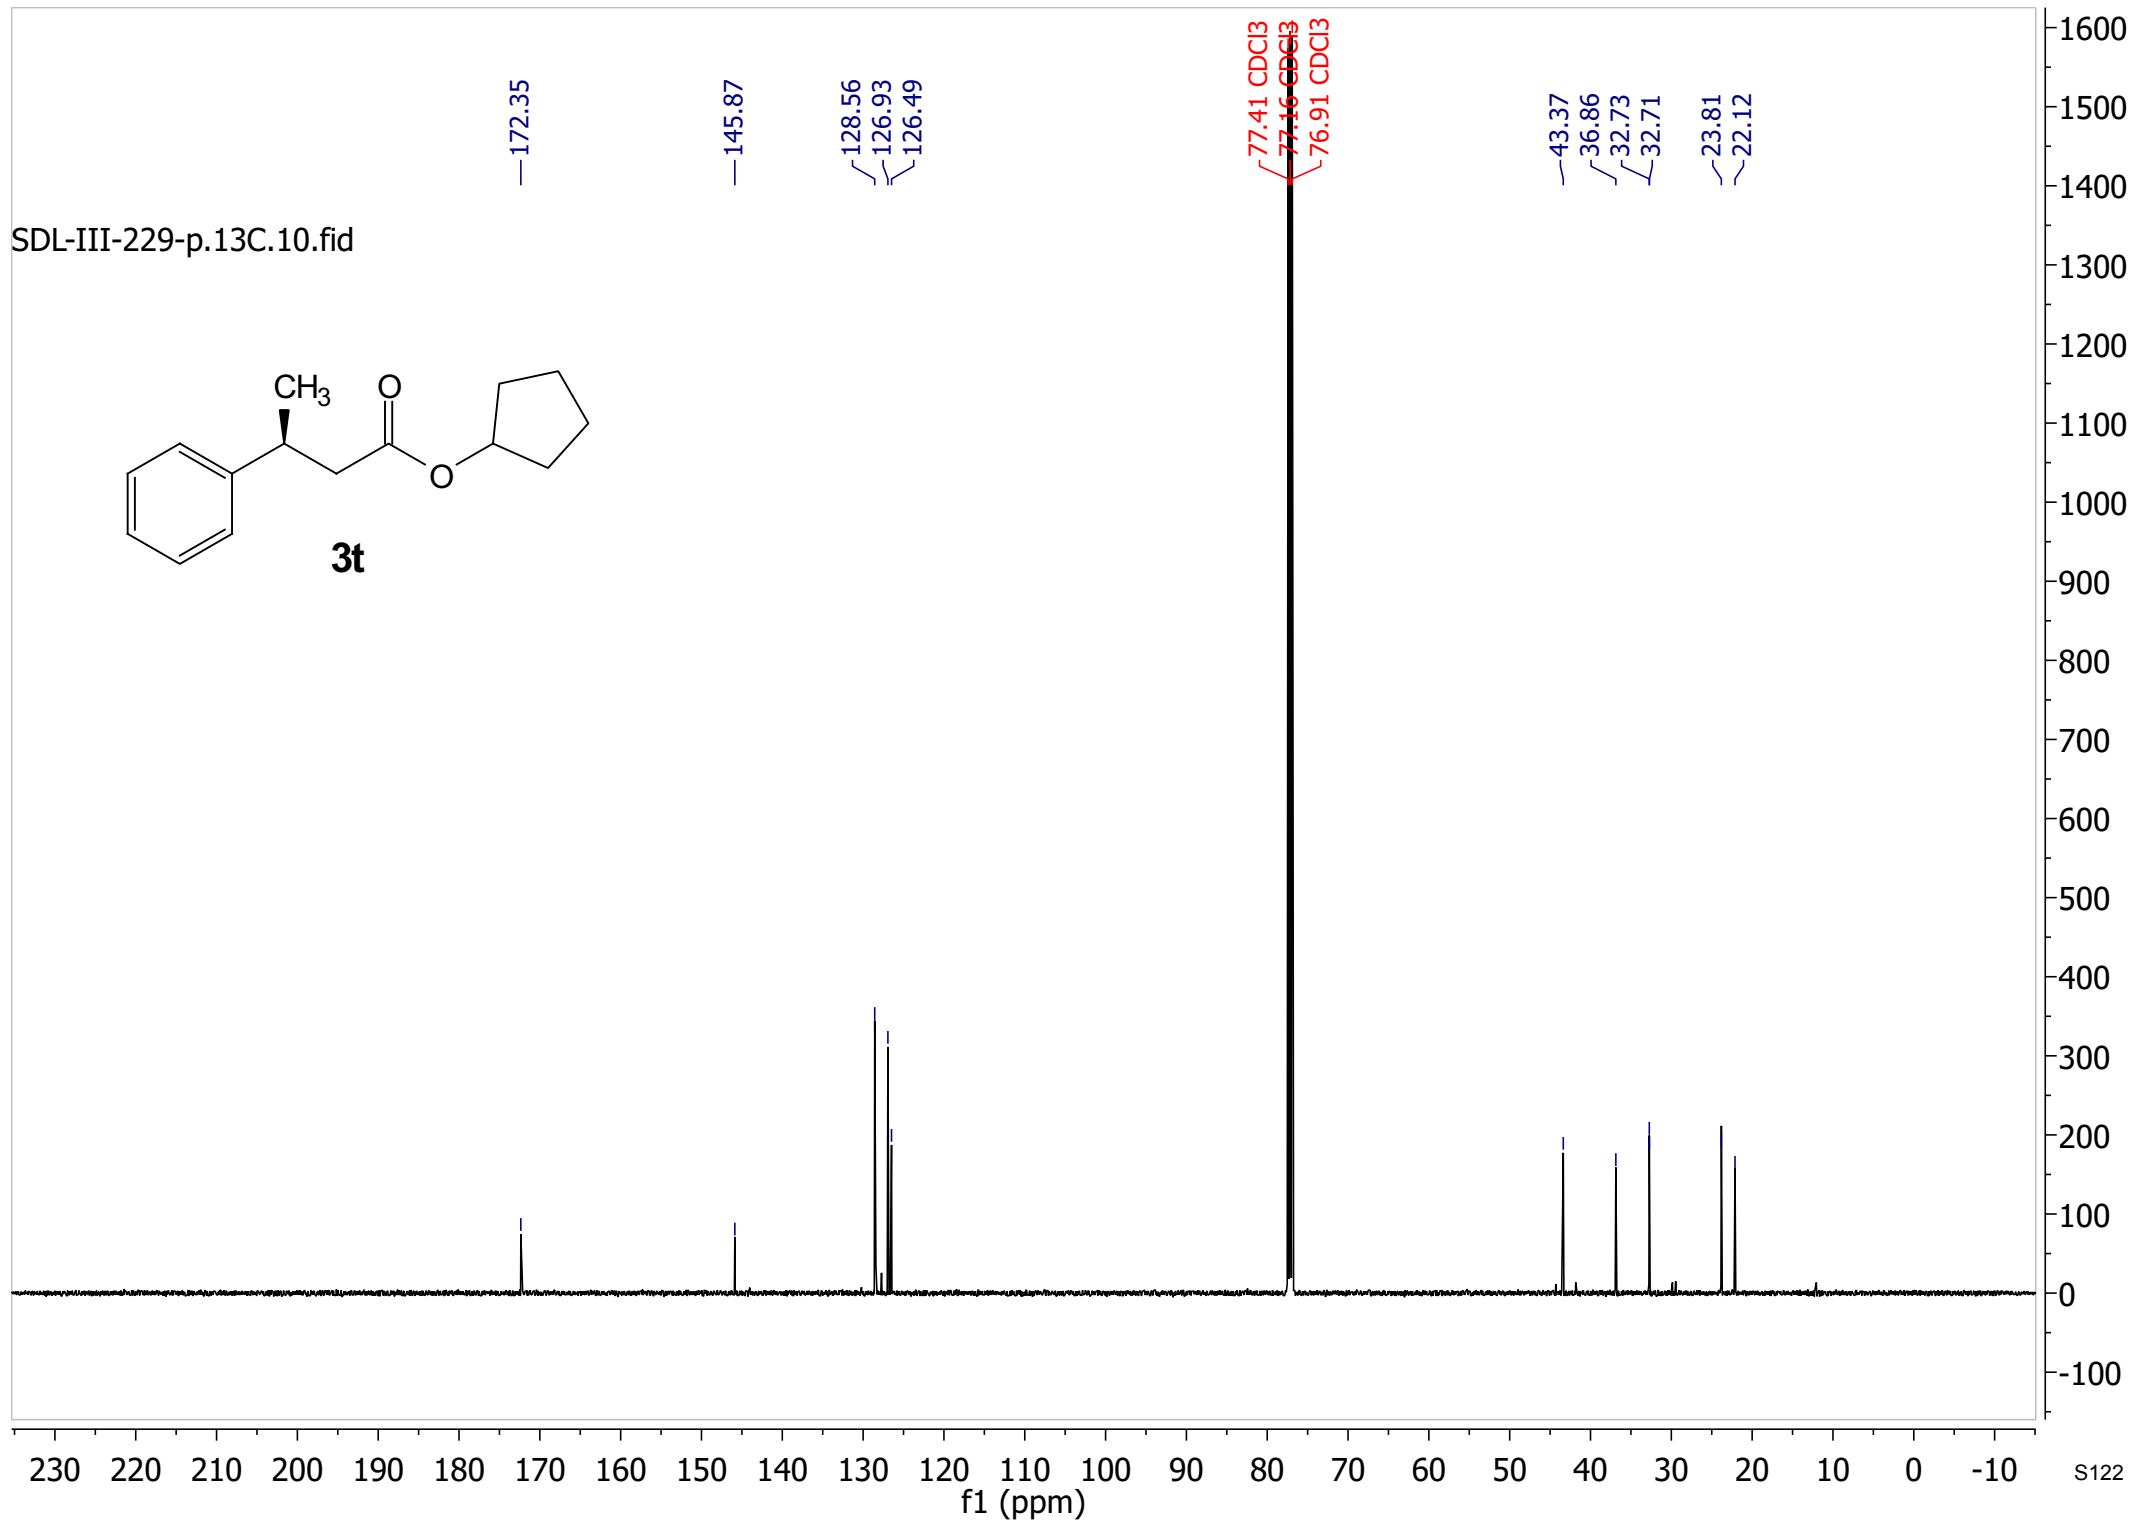

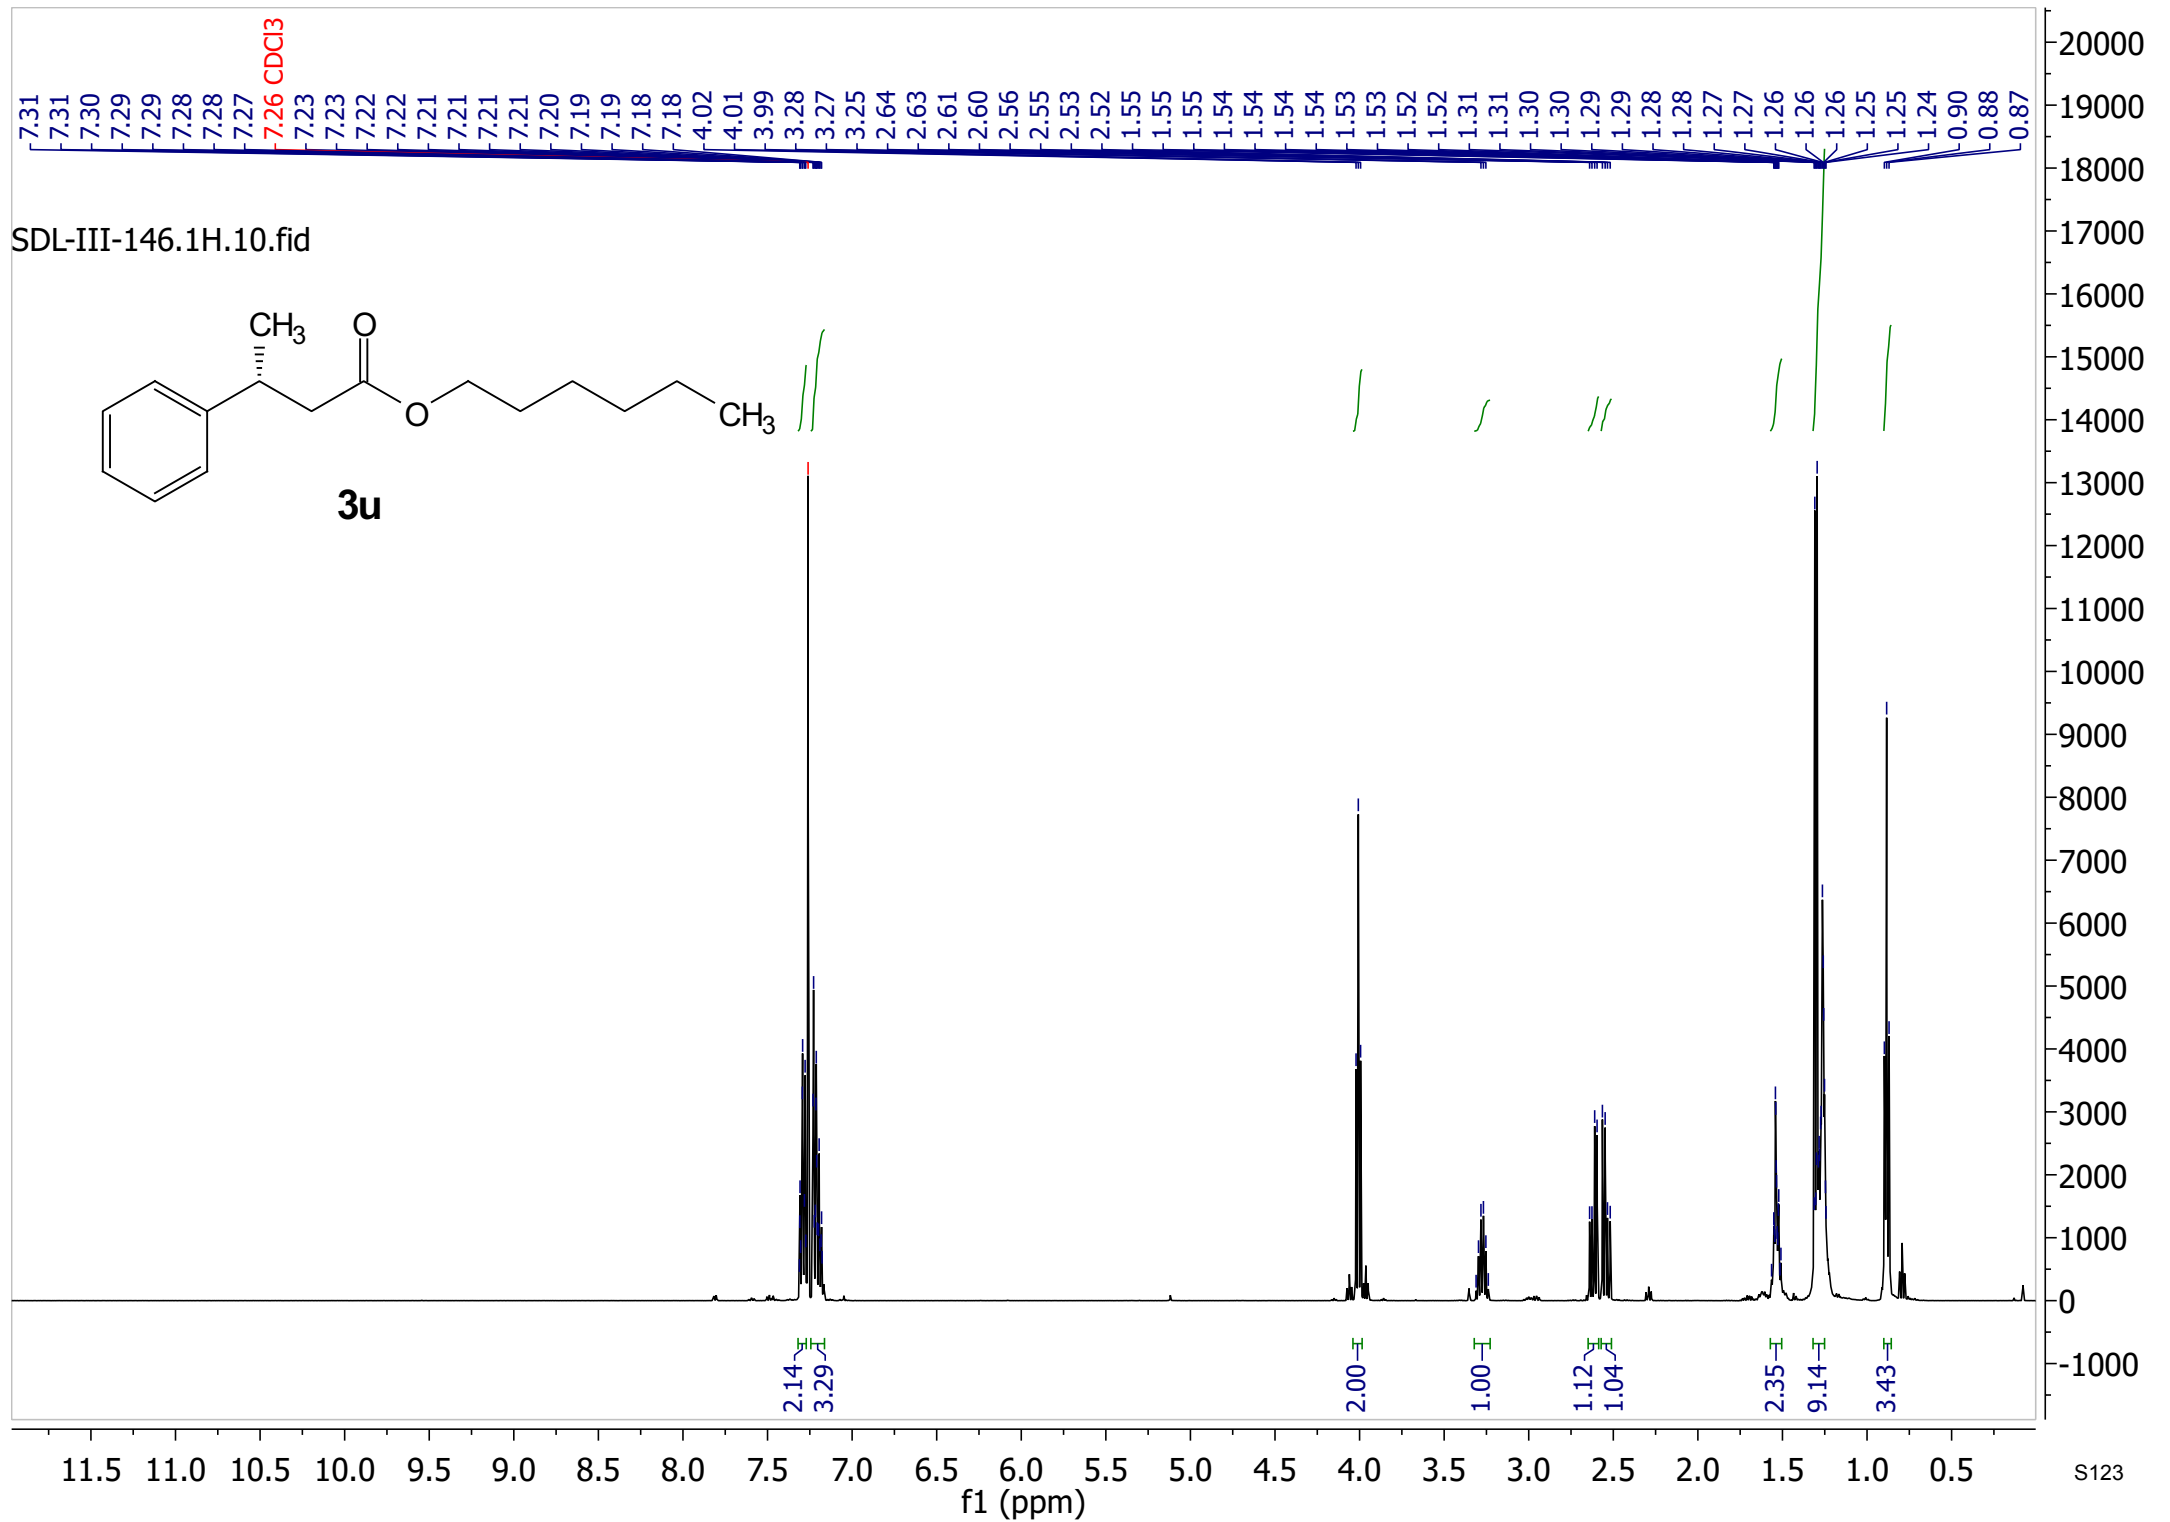

SDL-III-146.13C.10.fid

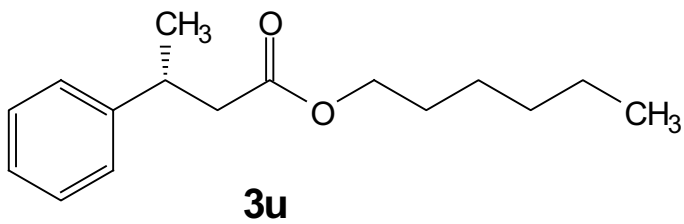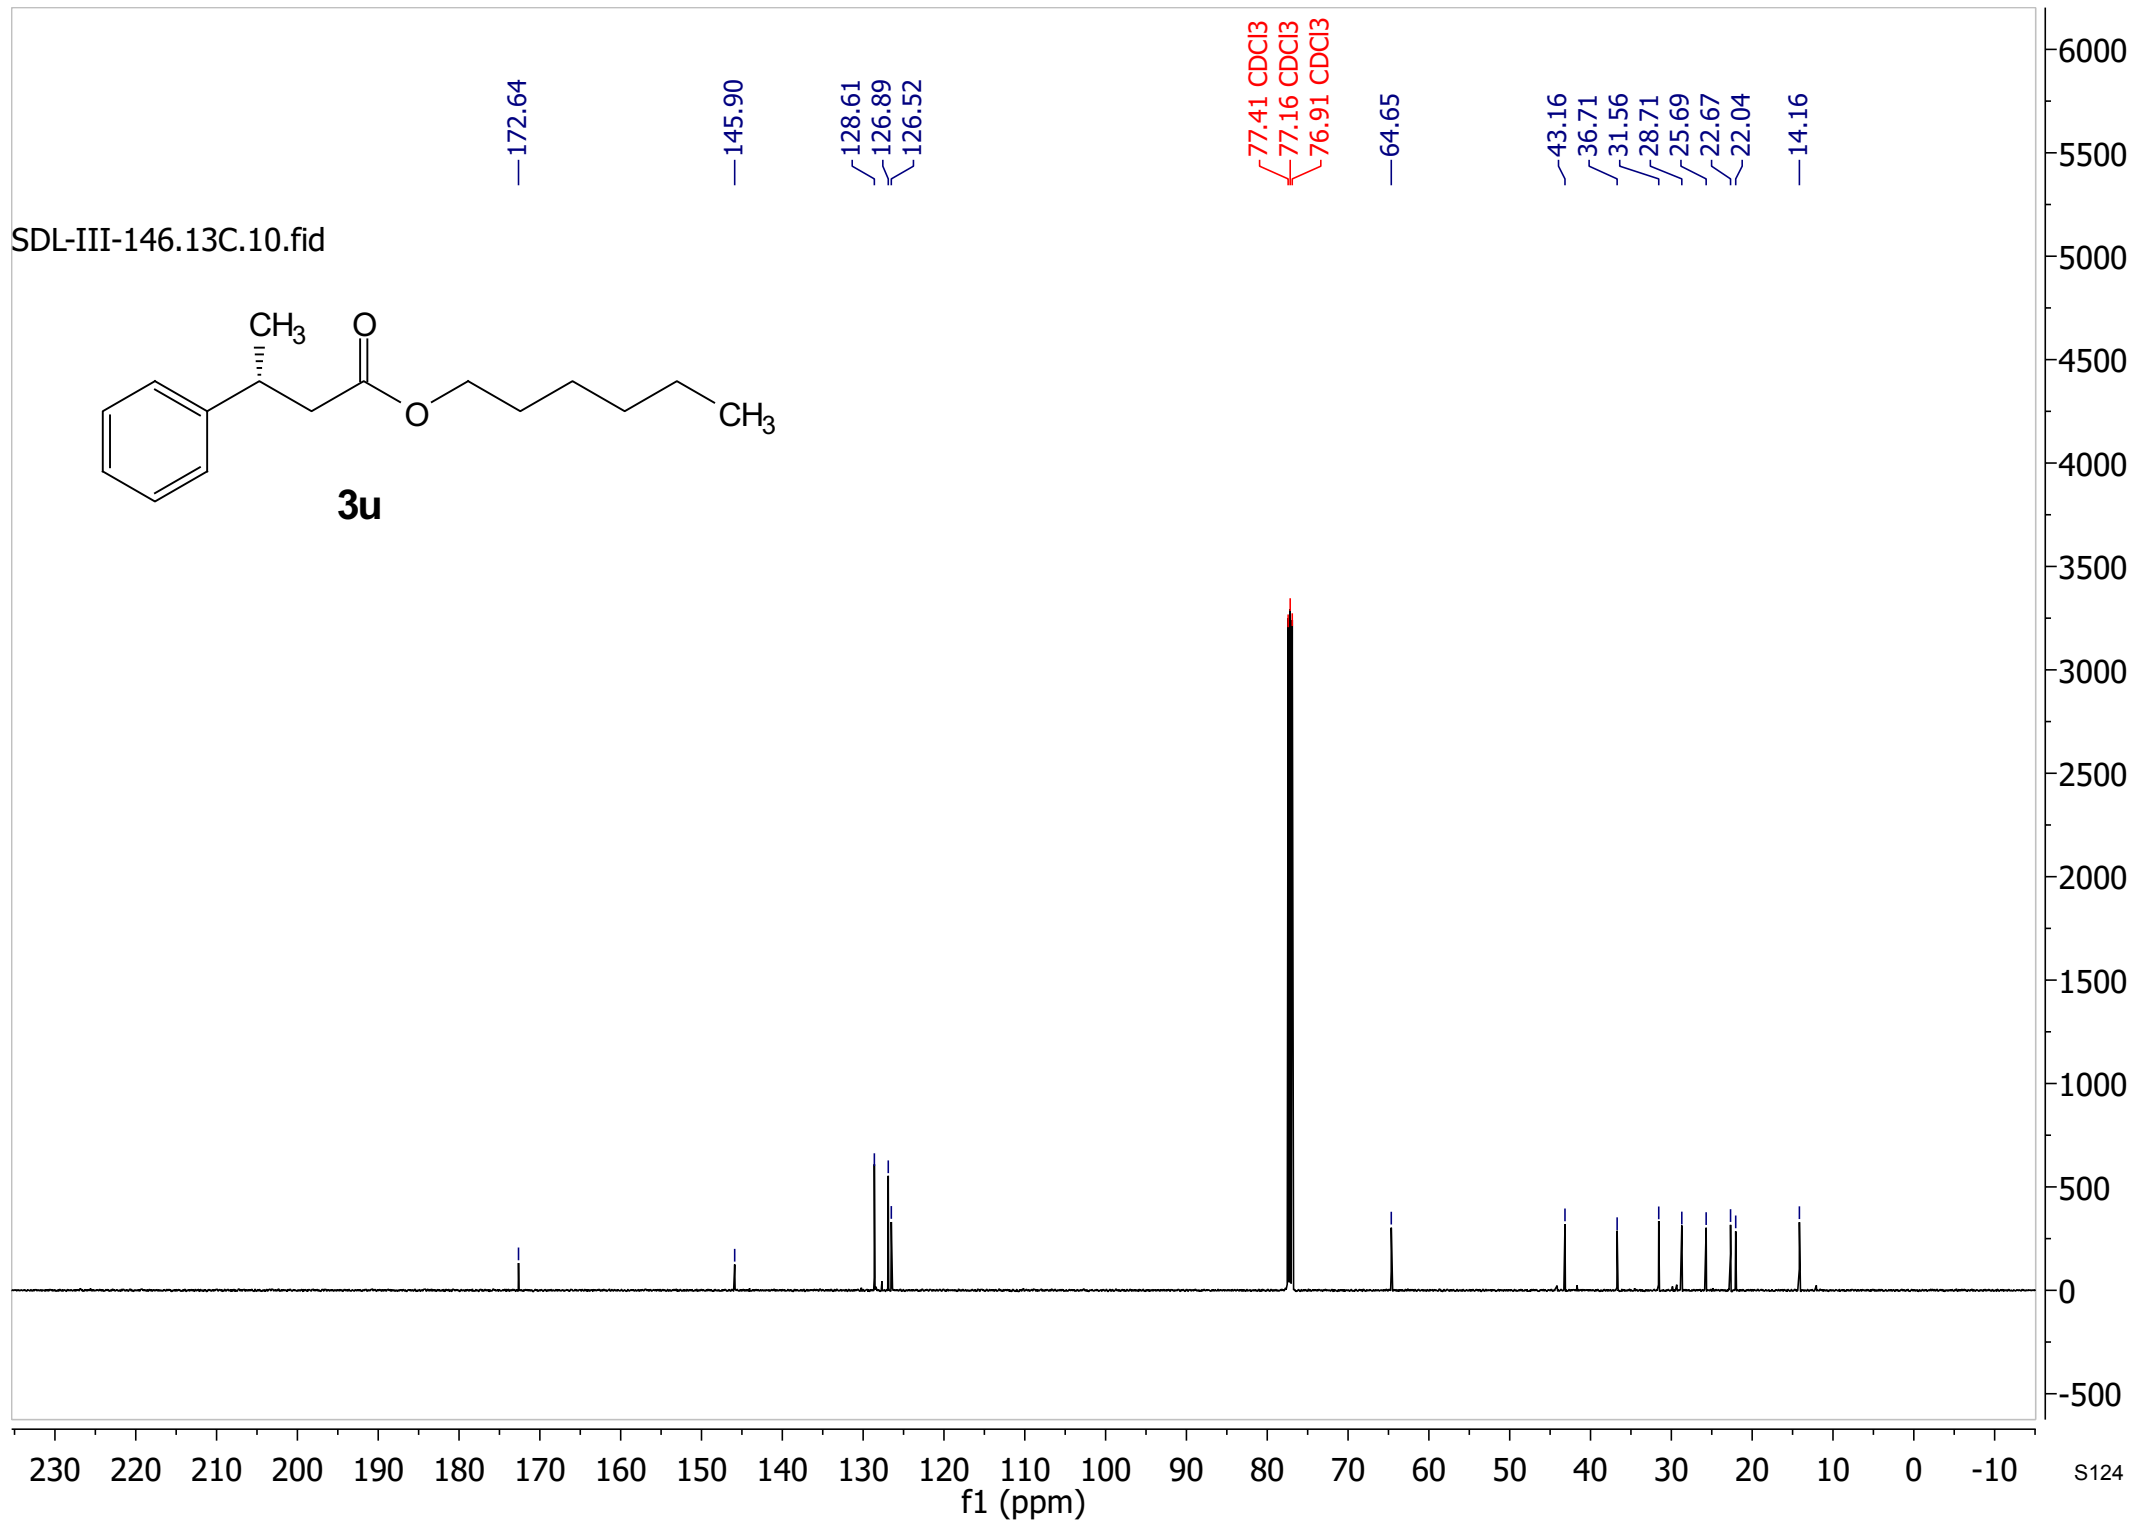

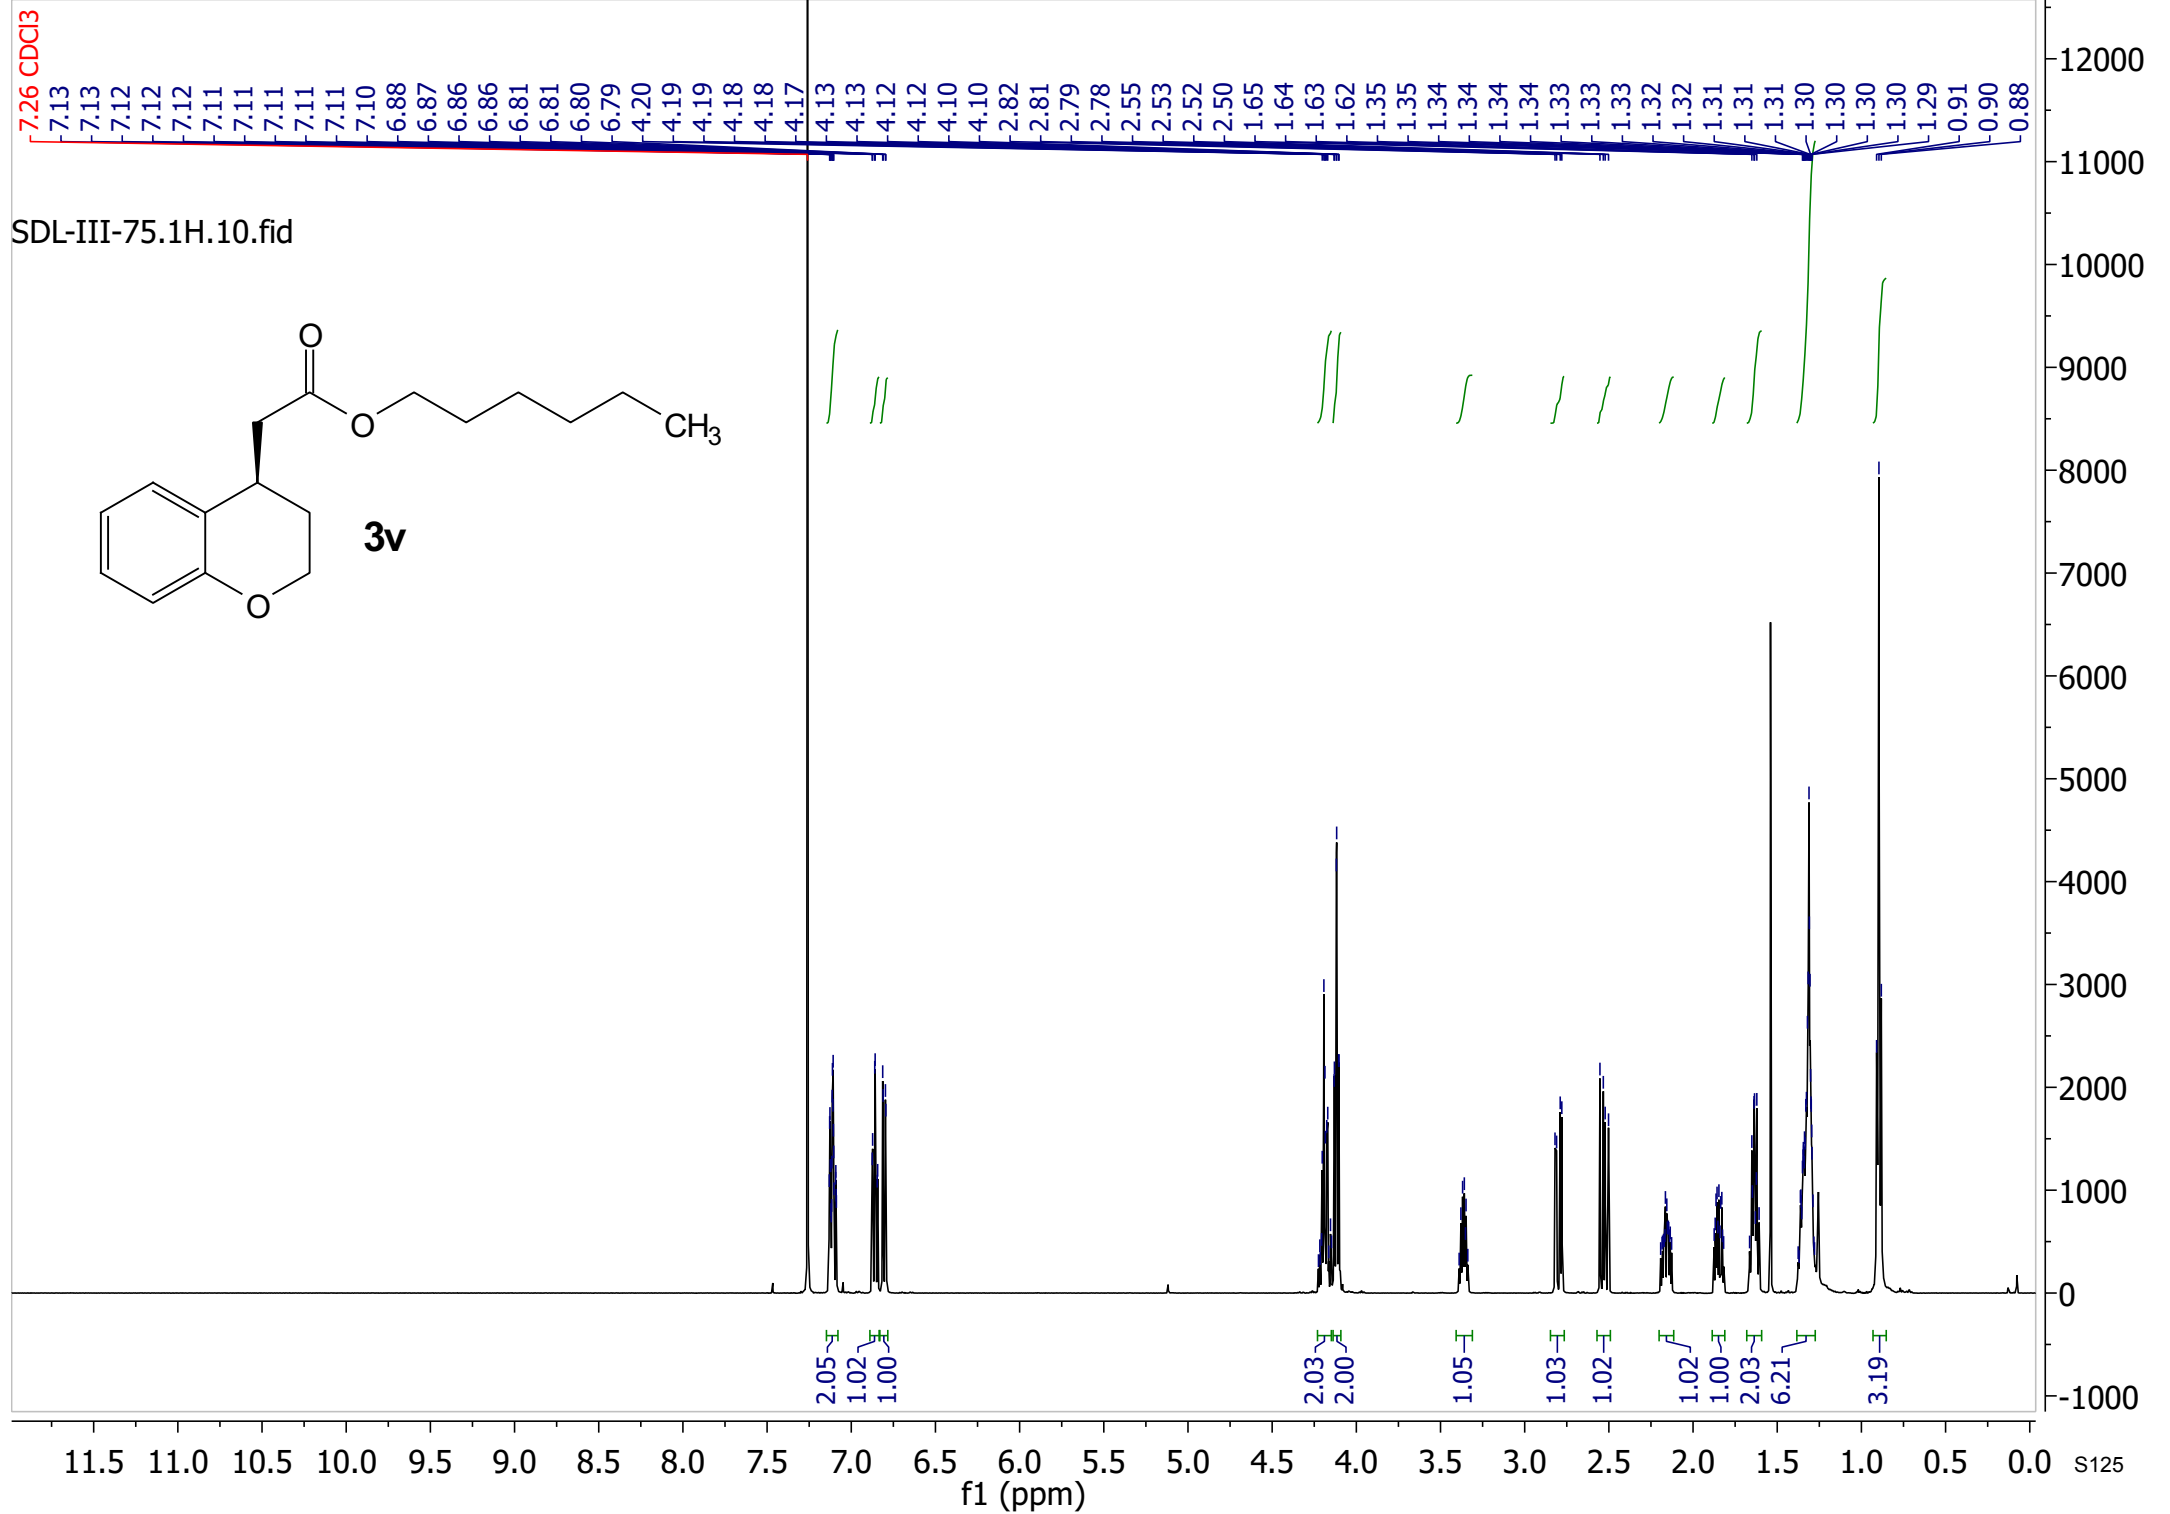

SDL-III-75.13C.10.fid

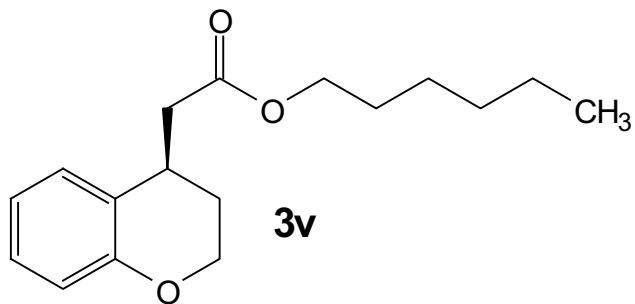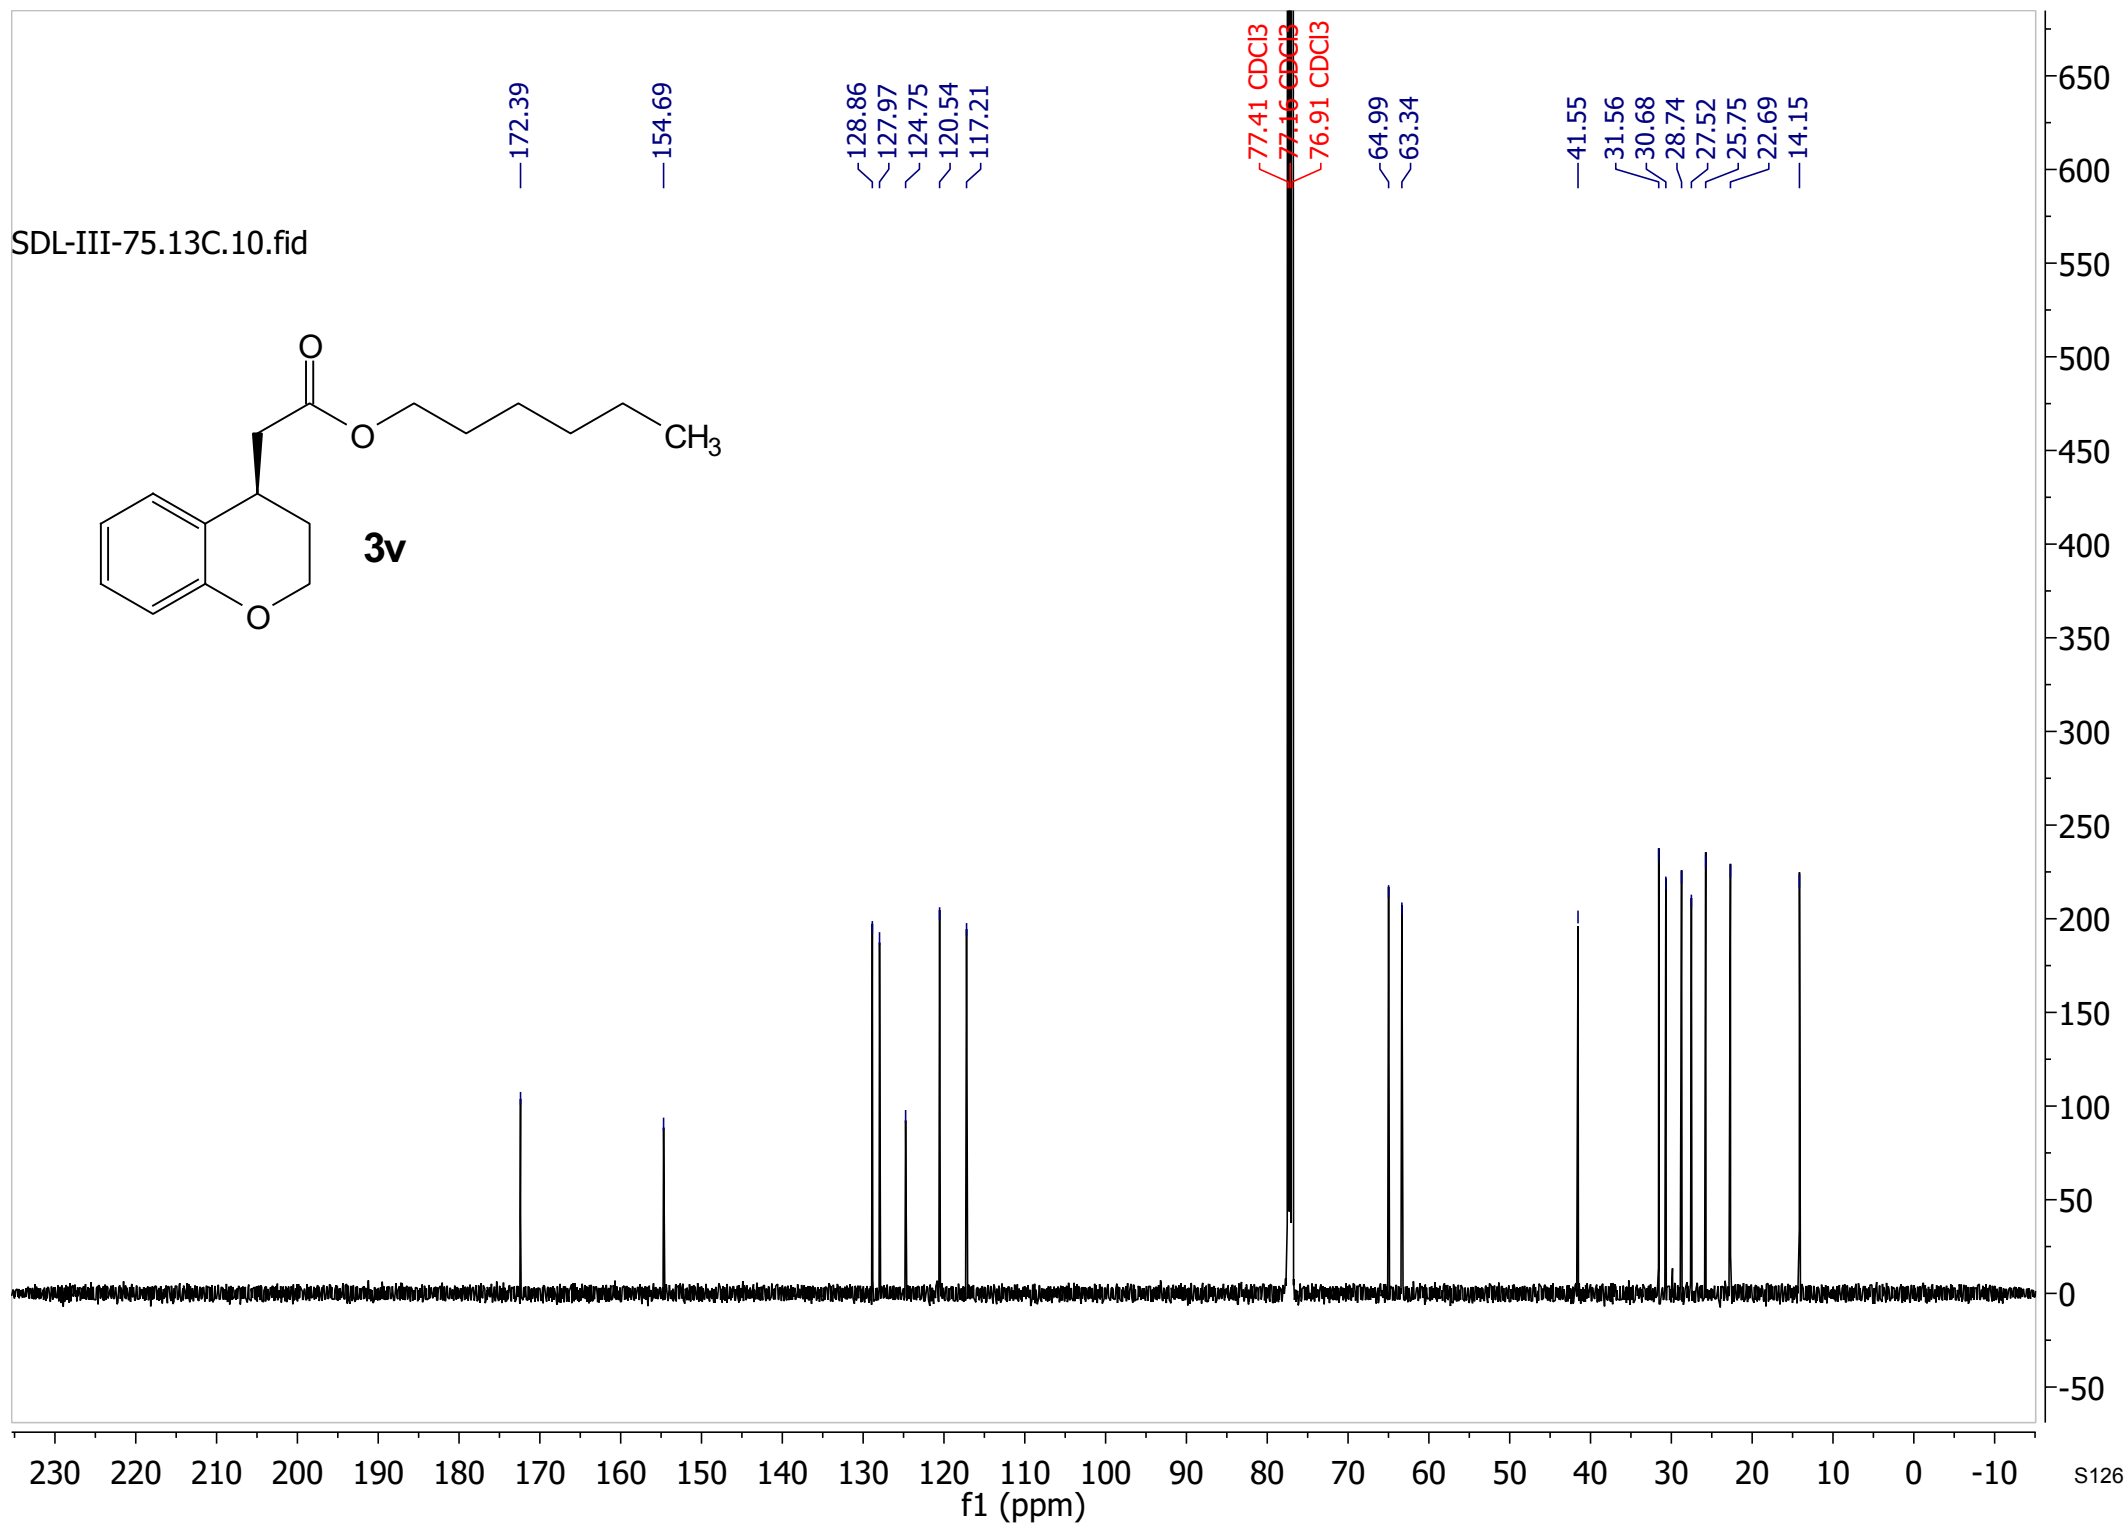

7.26 CDCl3

<sup>1</sup>H NMR (500 MHz, Chloroform-*d*) δ 7.17 – 7.04 (m, 4H), 4.06 (t, *J* = 6.7 Hz, 2H), 3.52 – 3.43 (m, 1H), 2.95 – 2.87 (m, 1H), 2.86 – 2.82 (m, 1H), 2.80 (dd, *J* = 15.1, 6.7 Hz, 1H), 2.70 (dd, *J* = 15.1, 8.9 Hz, 1H), 1.96 – 1.84 (m, 1H), 1.83 – 1.69 (m, 3H), 1.65 – 1.47 (m, 4H), 1.38 – 1.19 (m, 6H), 0.89 (t, *J* = 6.8 Hz, 3H).

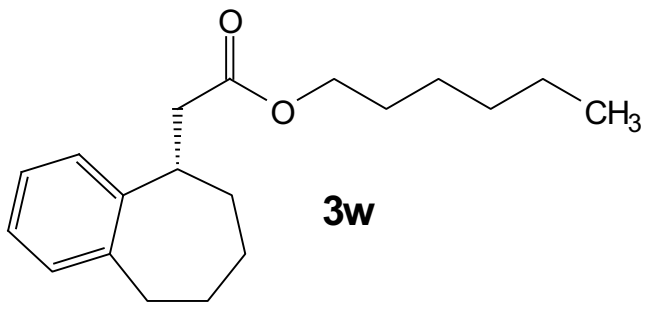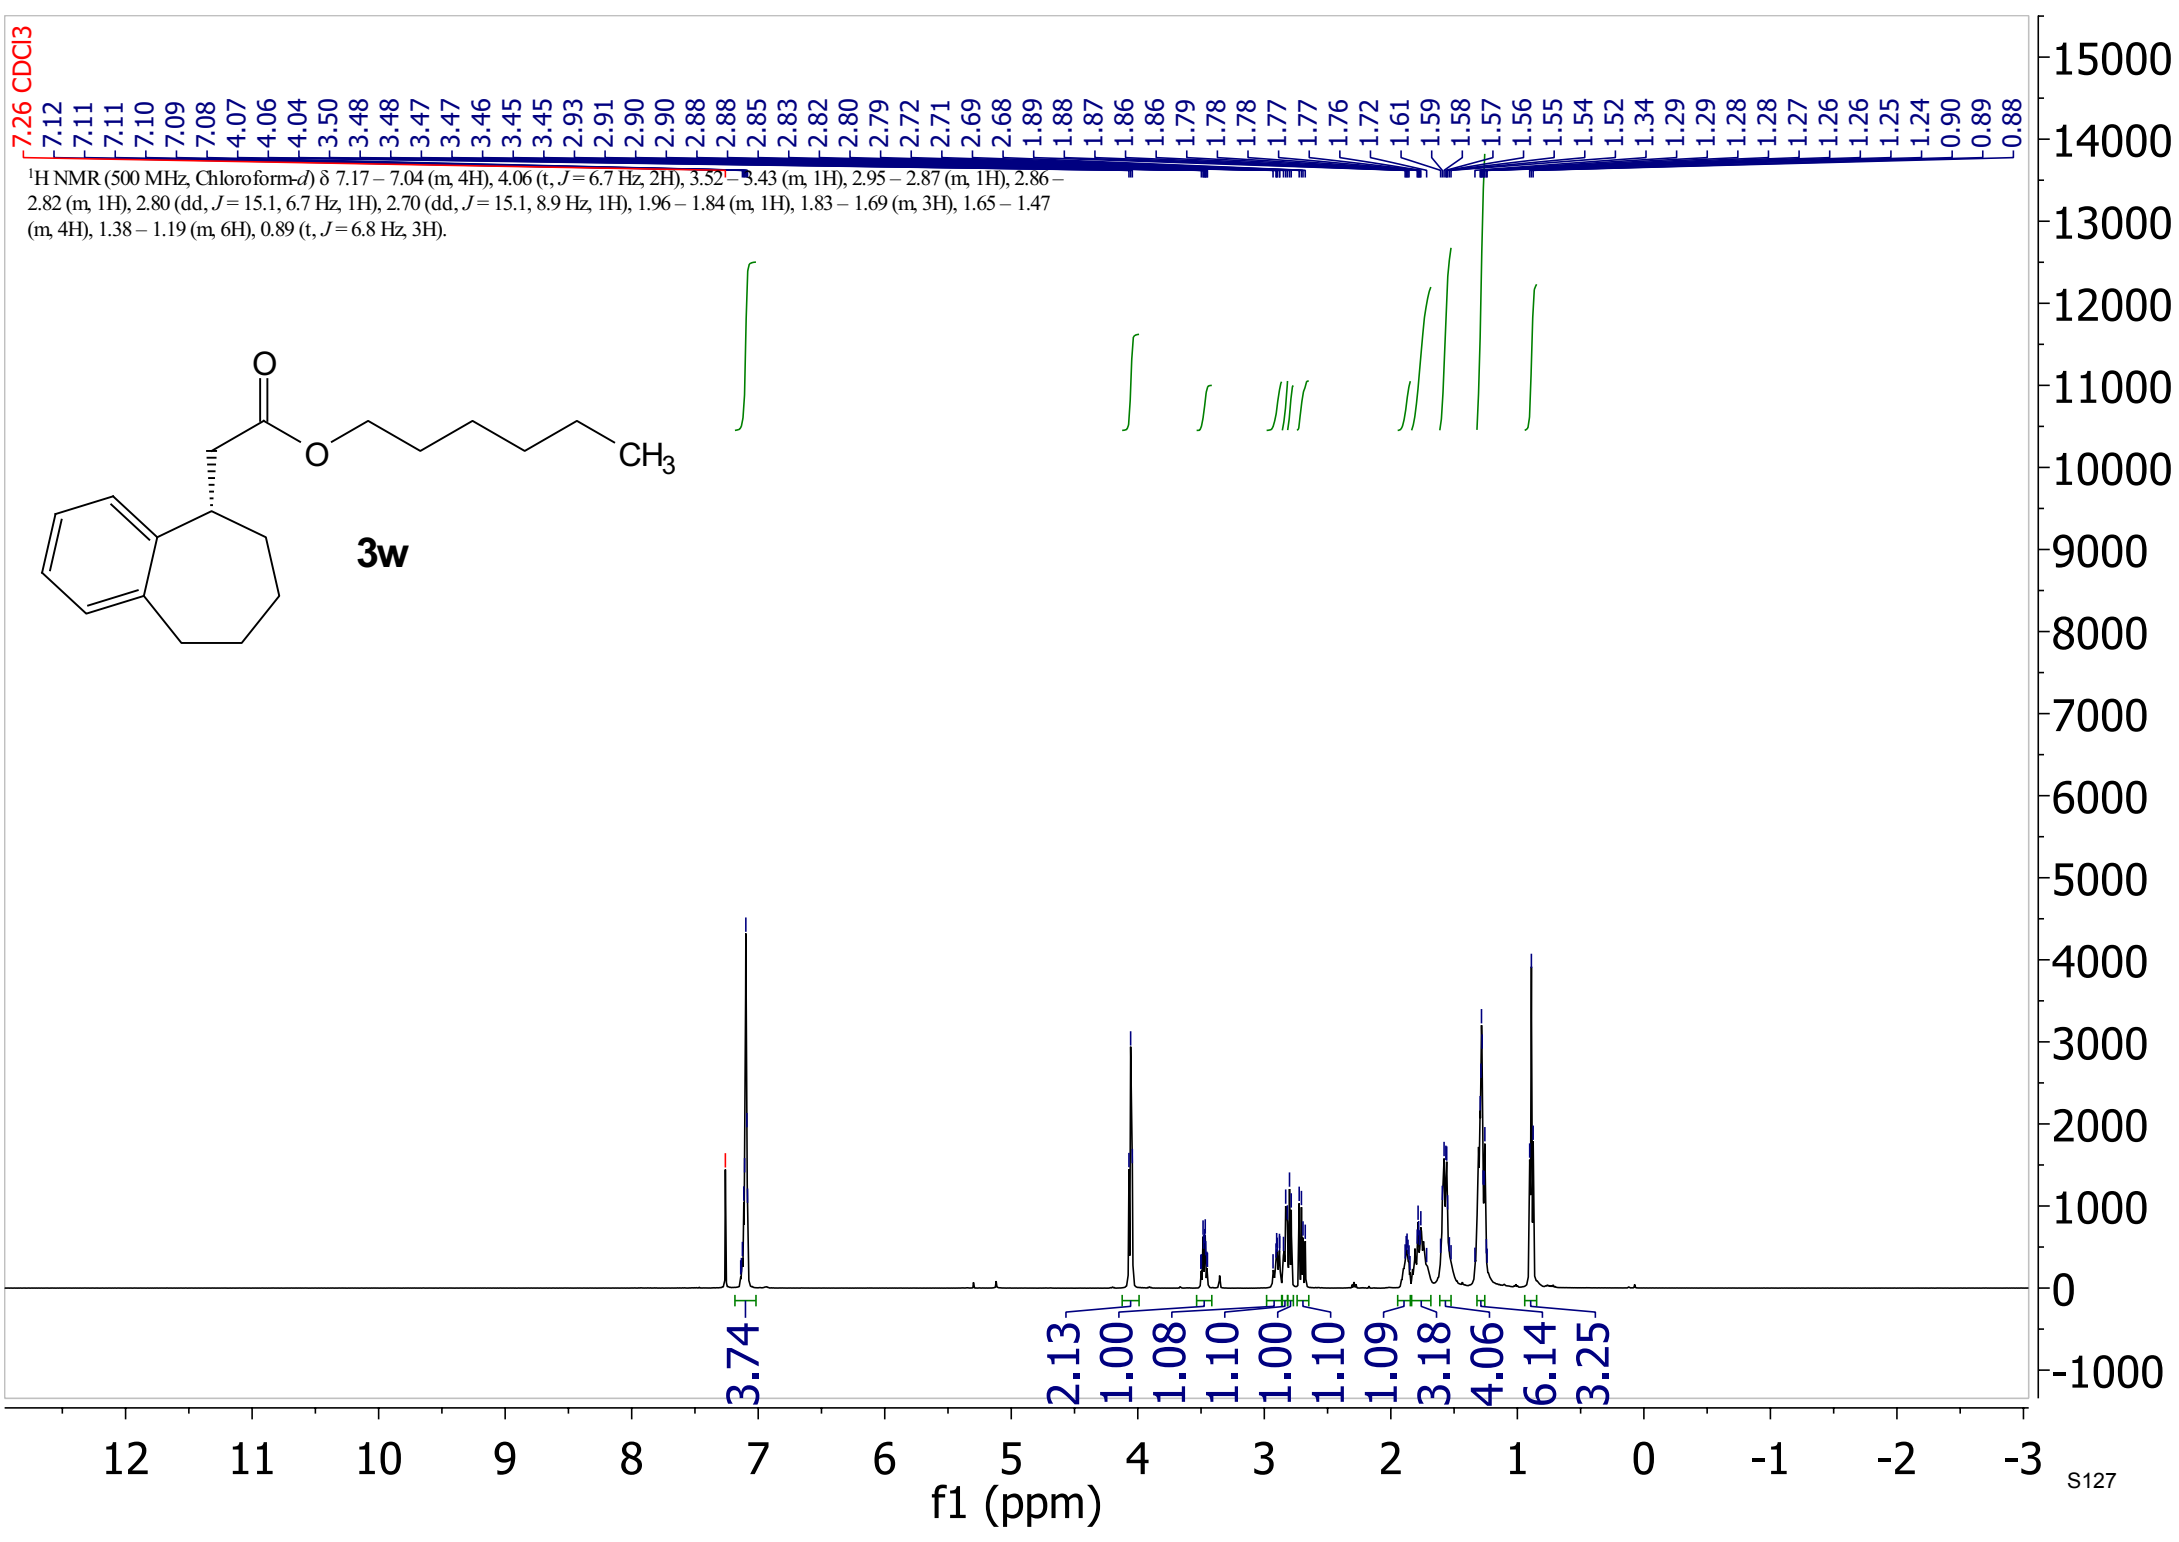

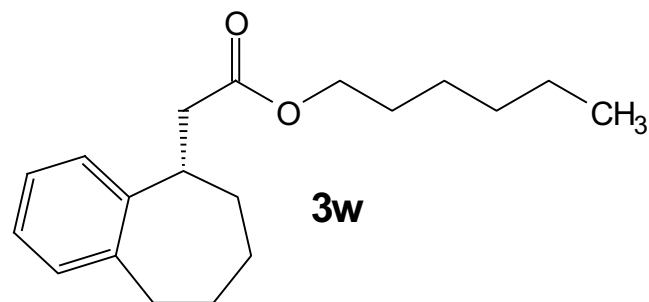

$^{13}\text{C}$  NMR (126 MHz,  $\text{CDCl}_3$ )  $\delta$  173.08, 144.07, 142.71, 129.87, 126.37, 126.24, 64.71, 40.82, 38.84, 36.17, 33.51, 31.56, 29.86, 28.74, 27.95, 25.73, 22.69, 14.15.

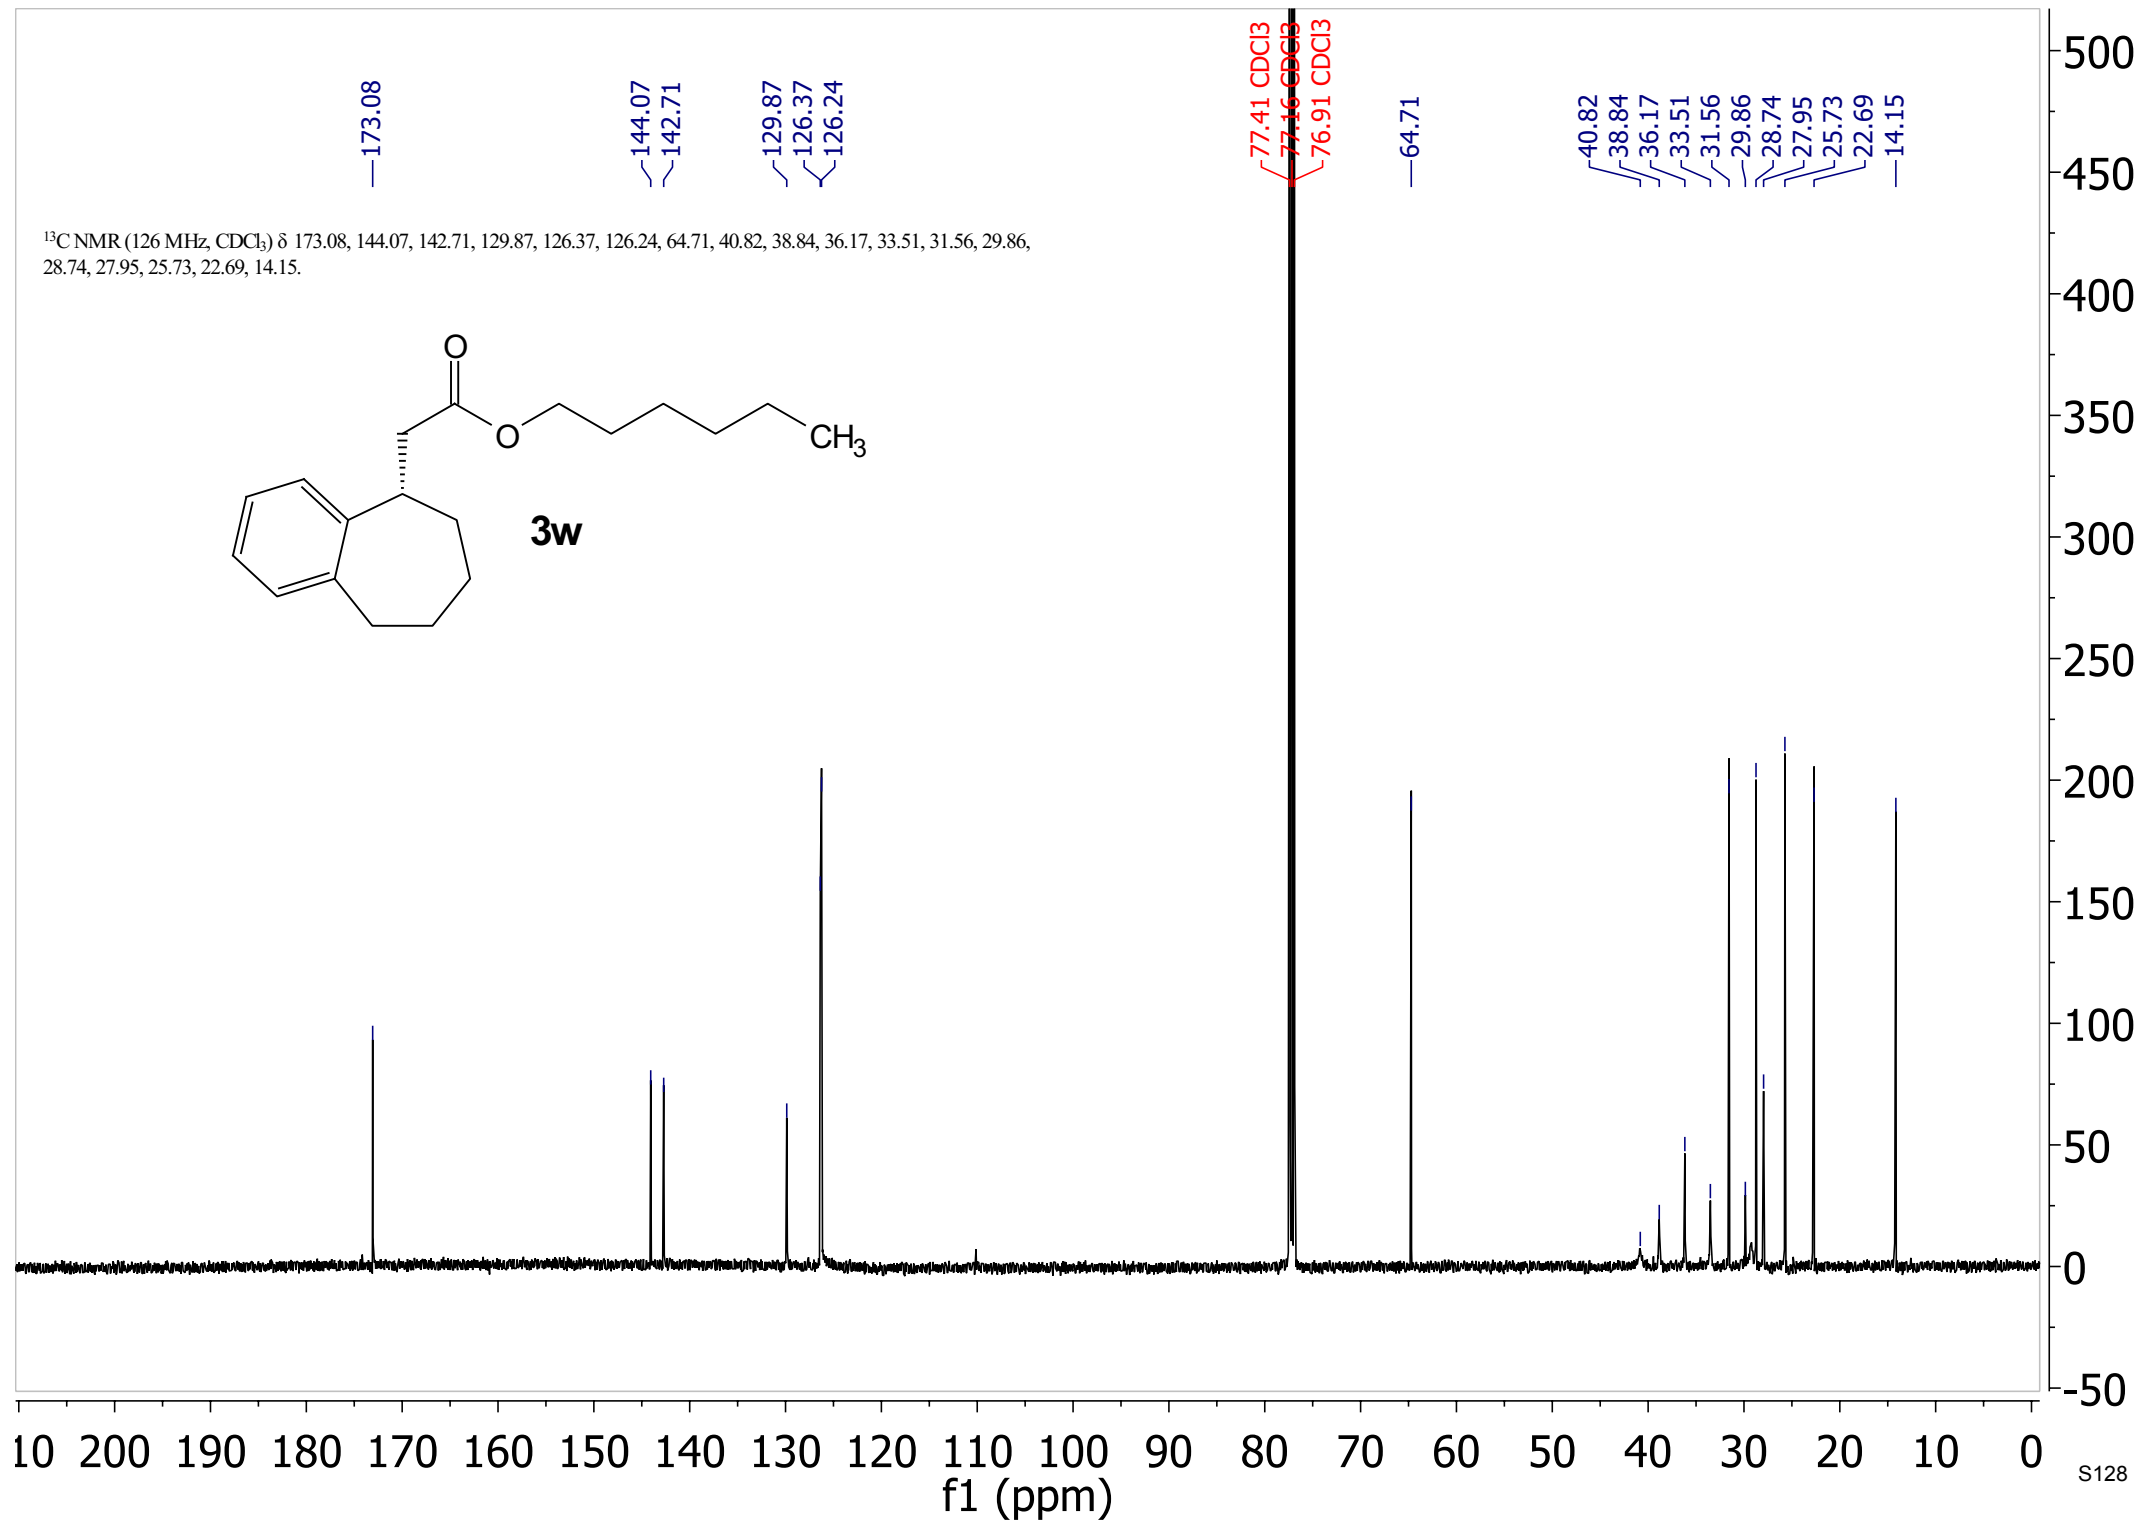



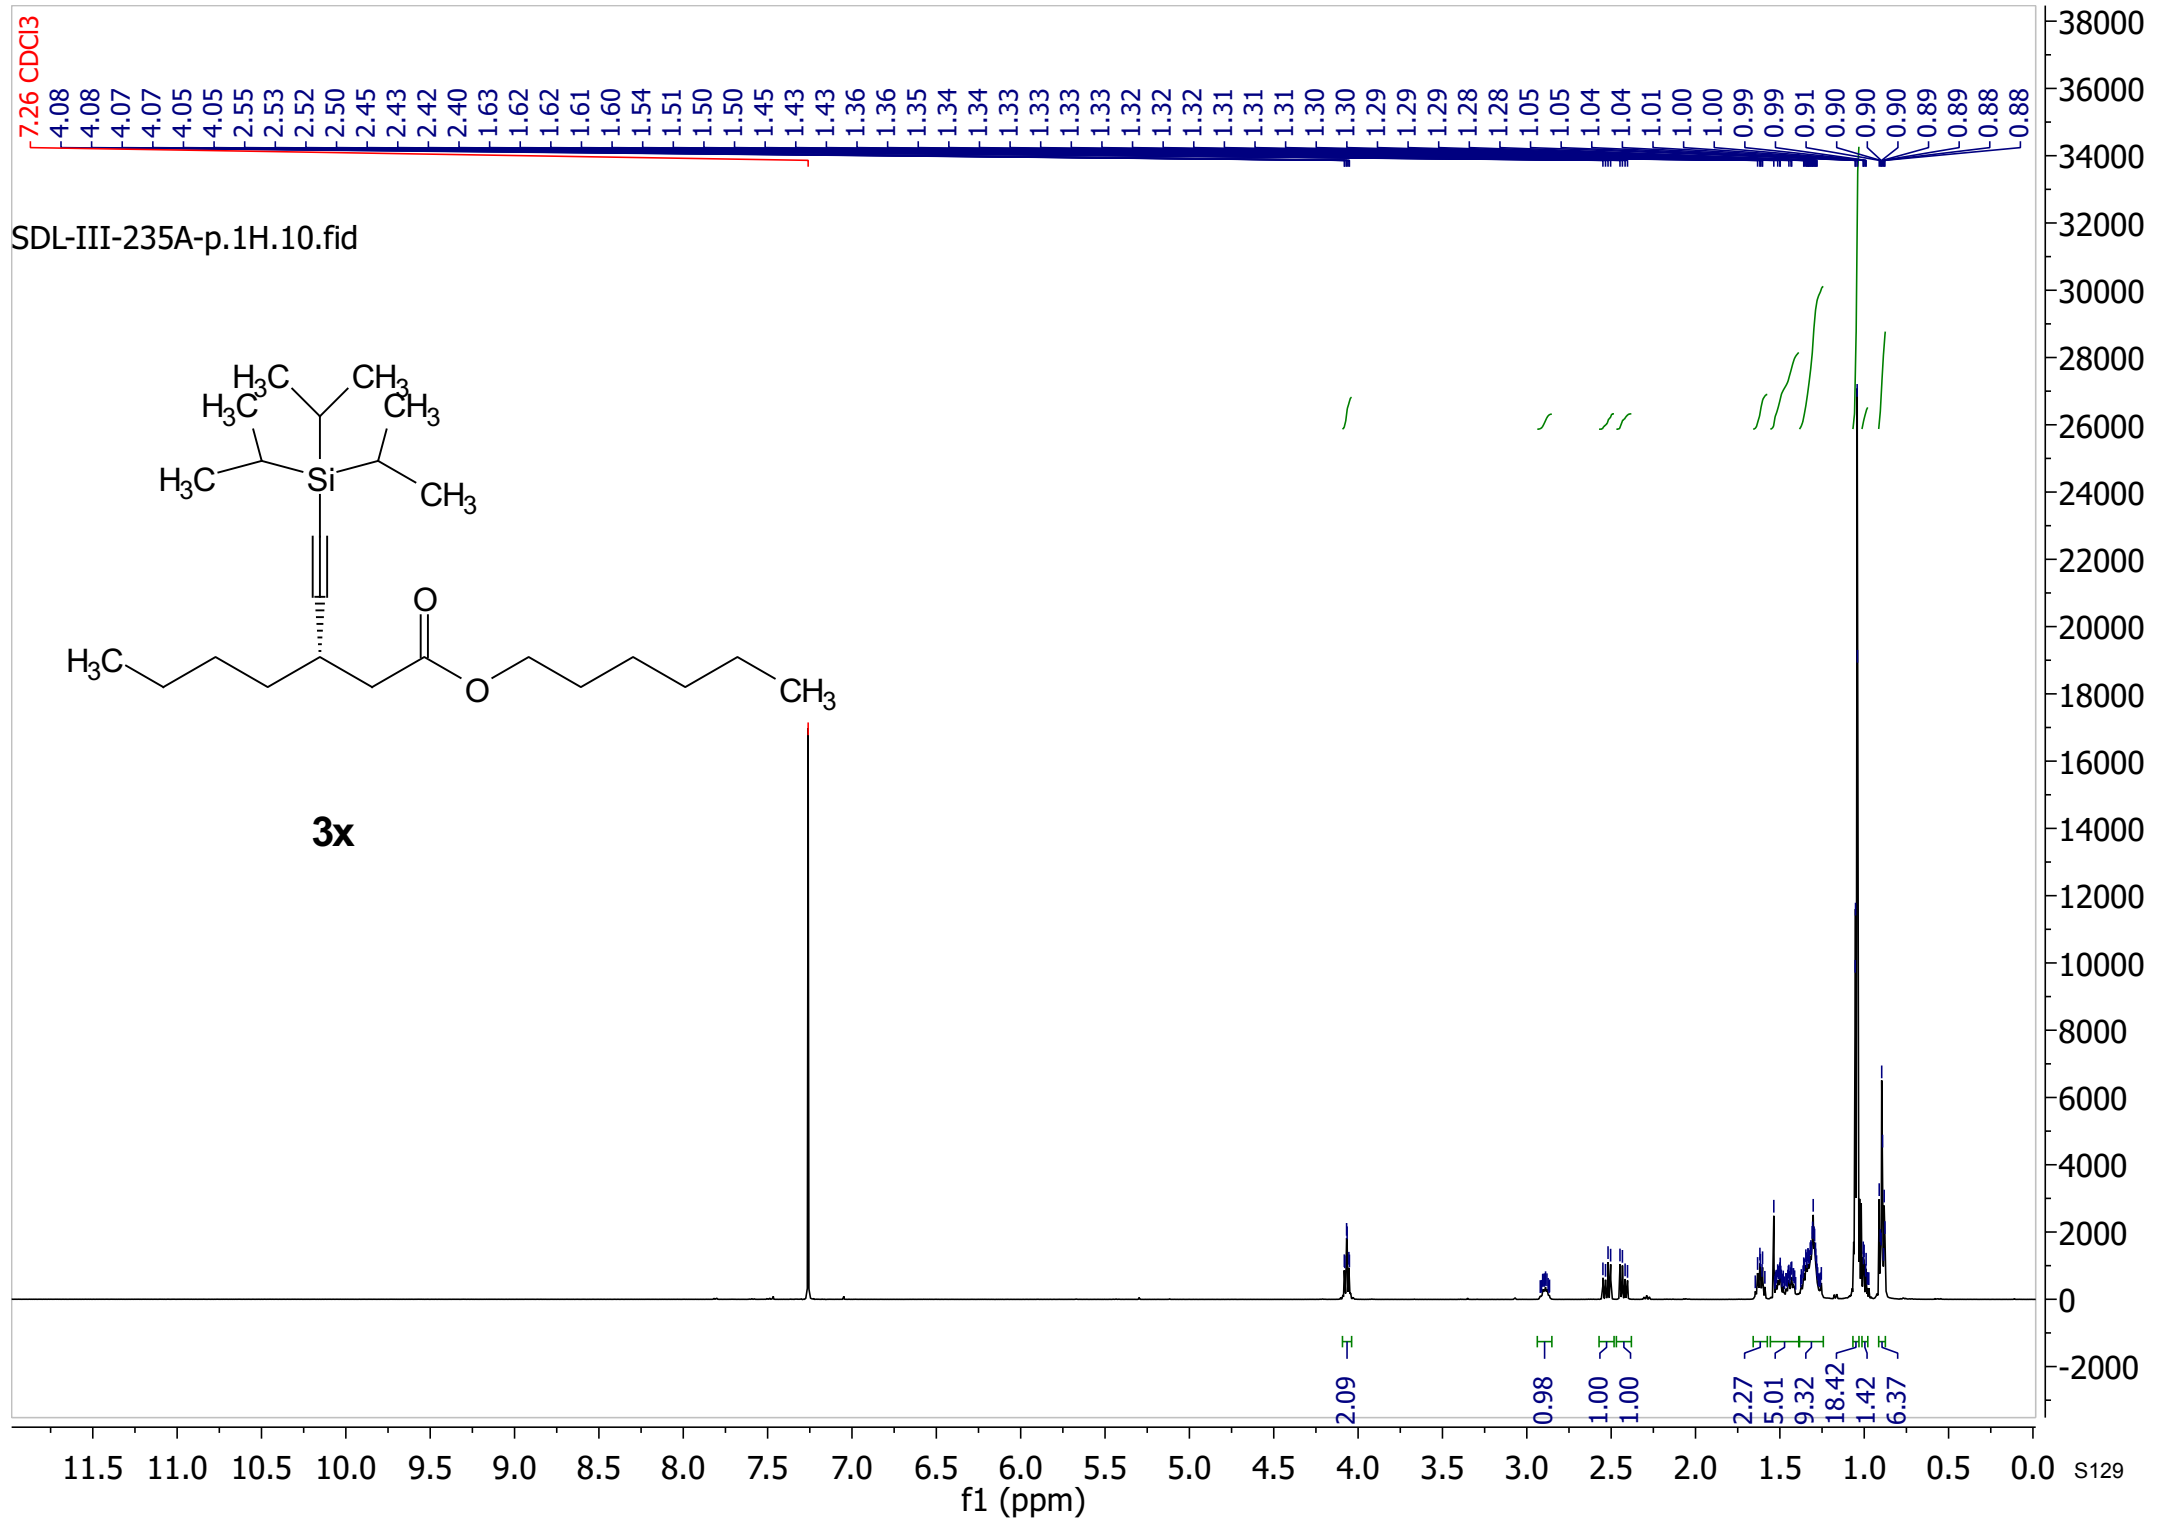

SDL-III-235A-p.13C.10.fid

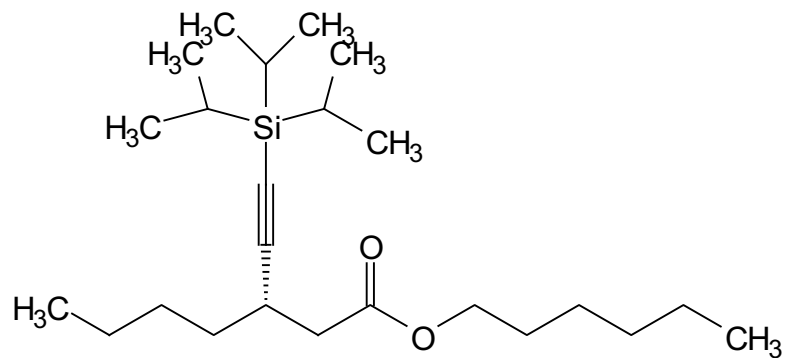

**3x**

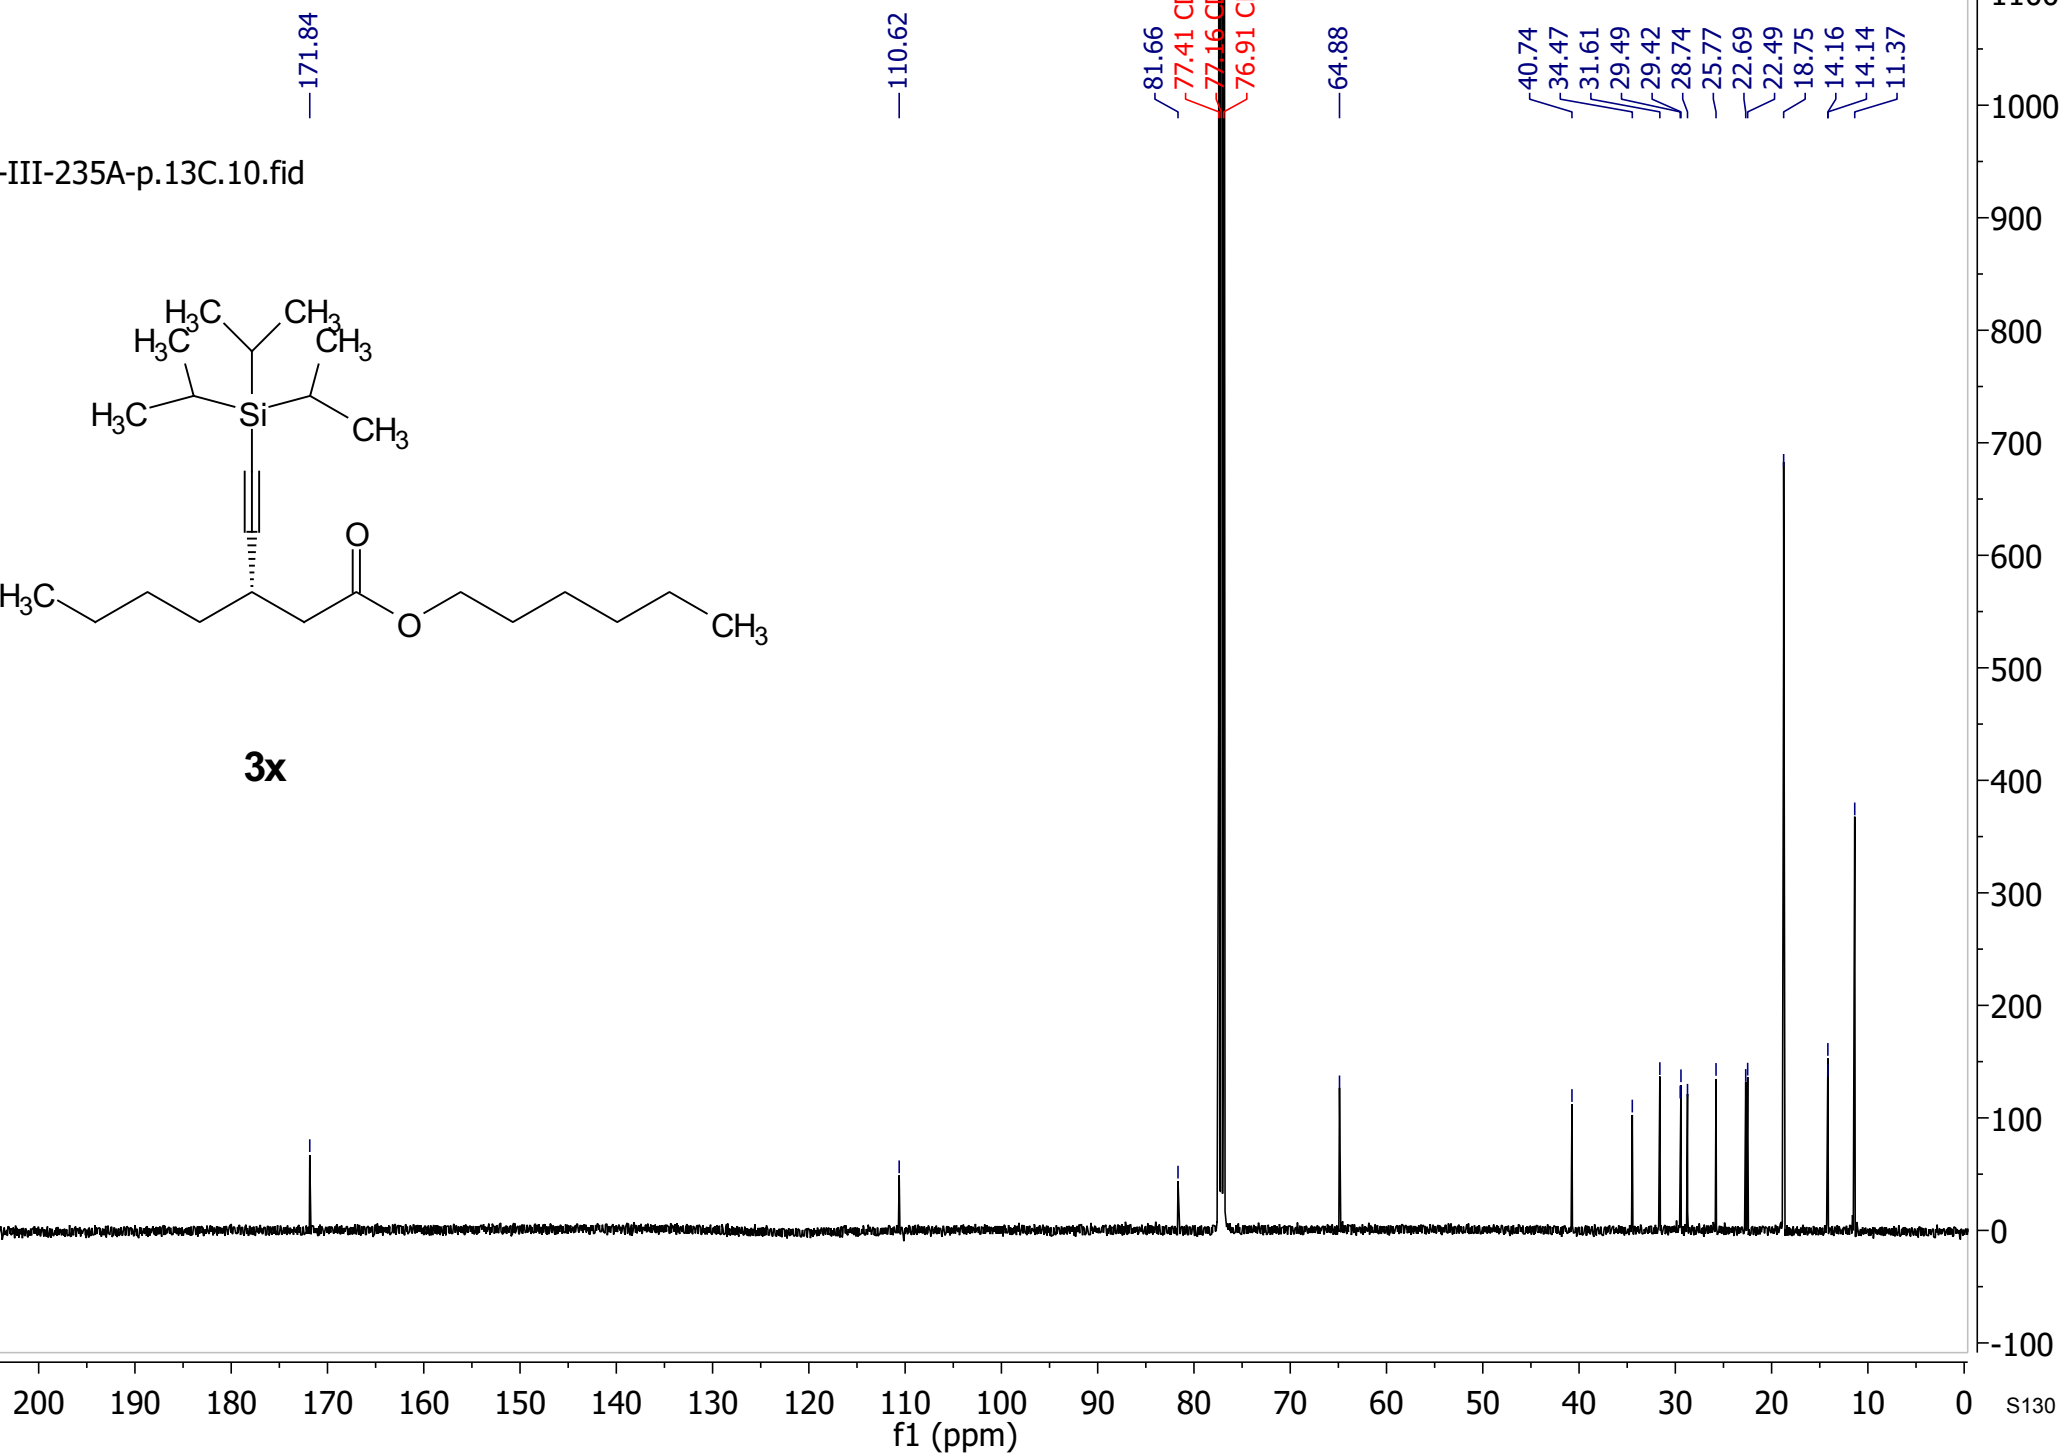

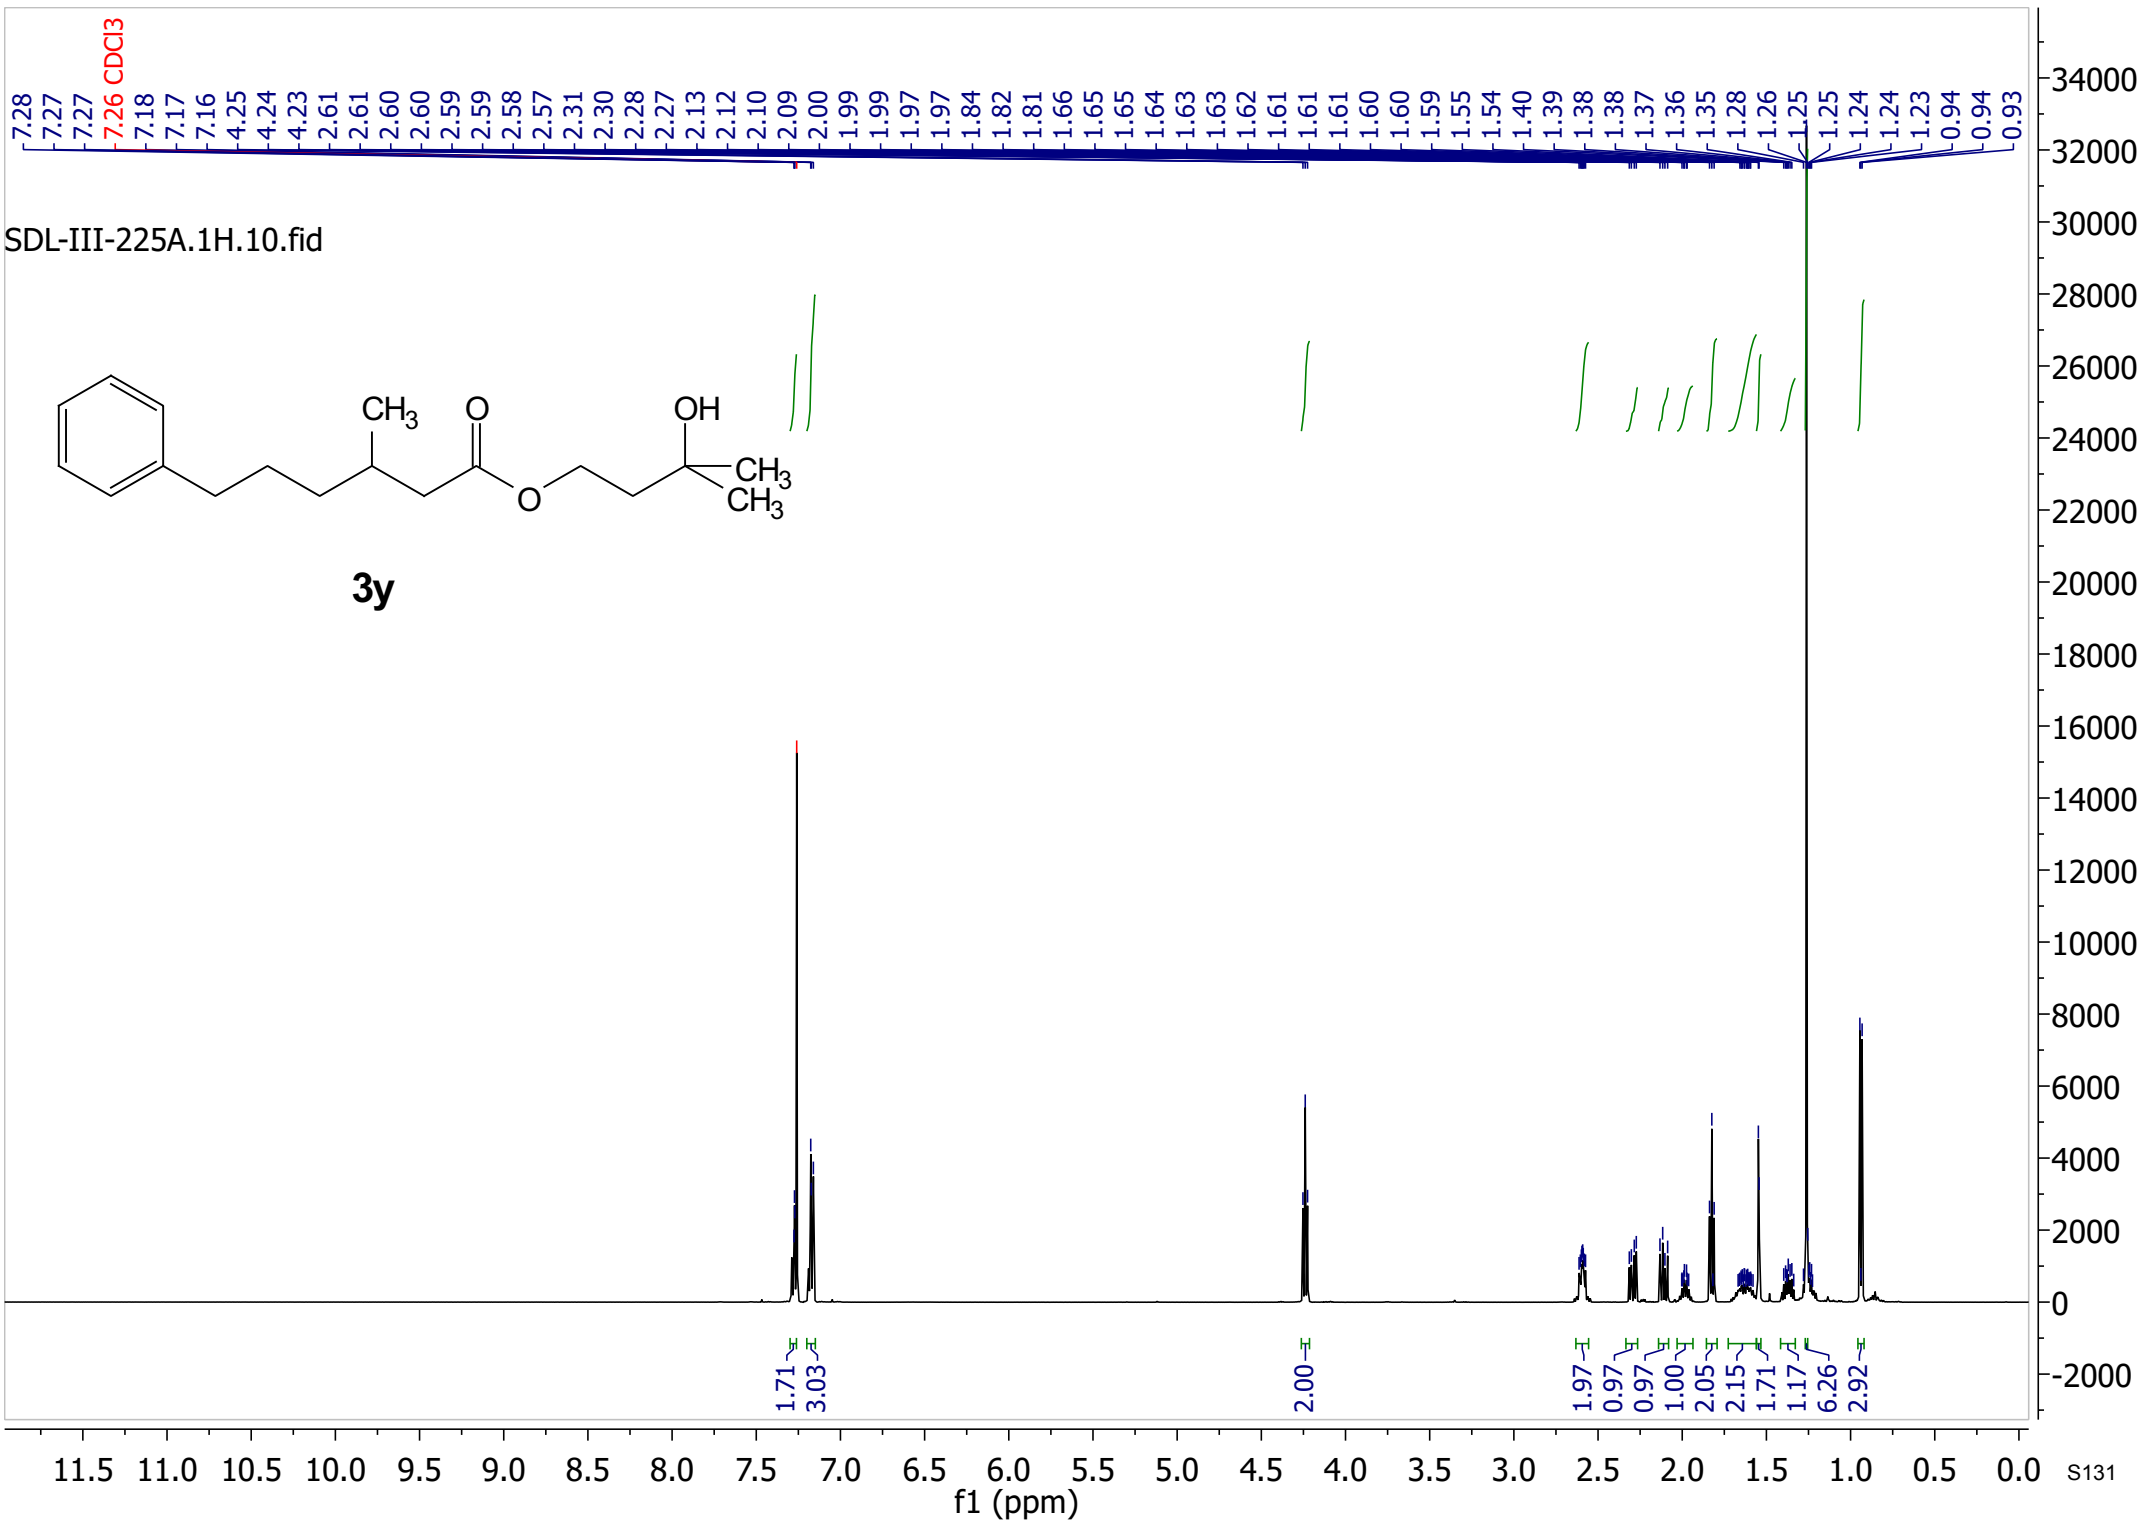

SDL-III-225A.13C.10.fid

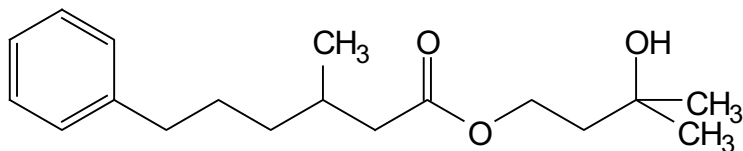

3y

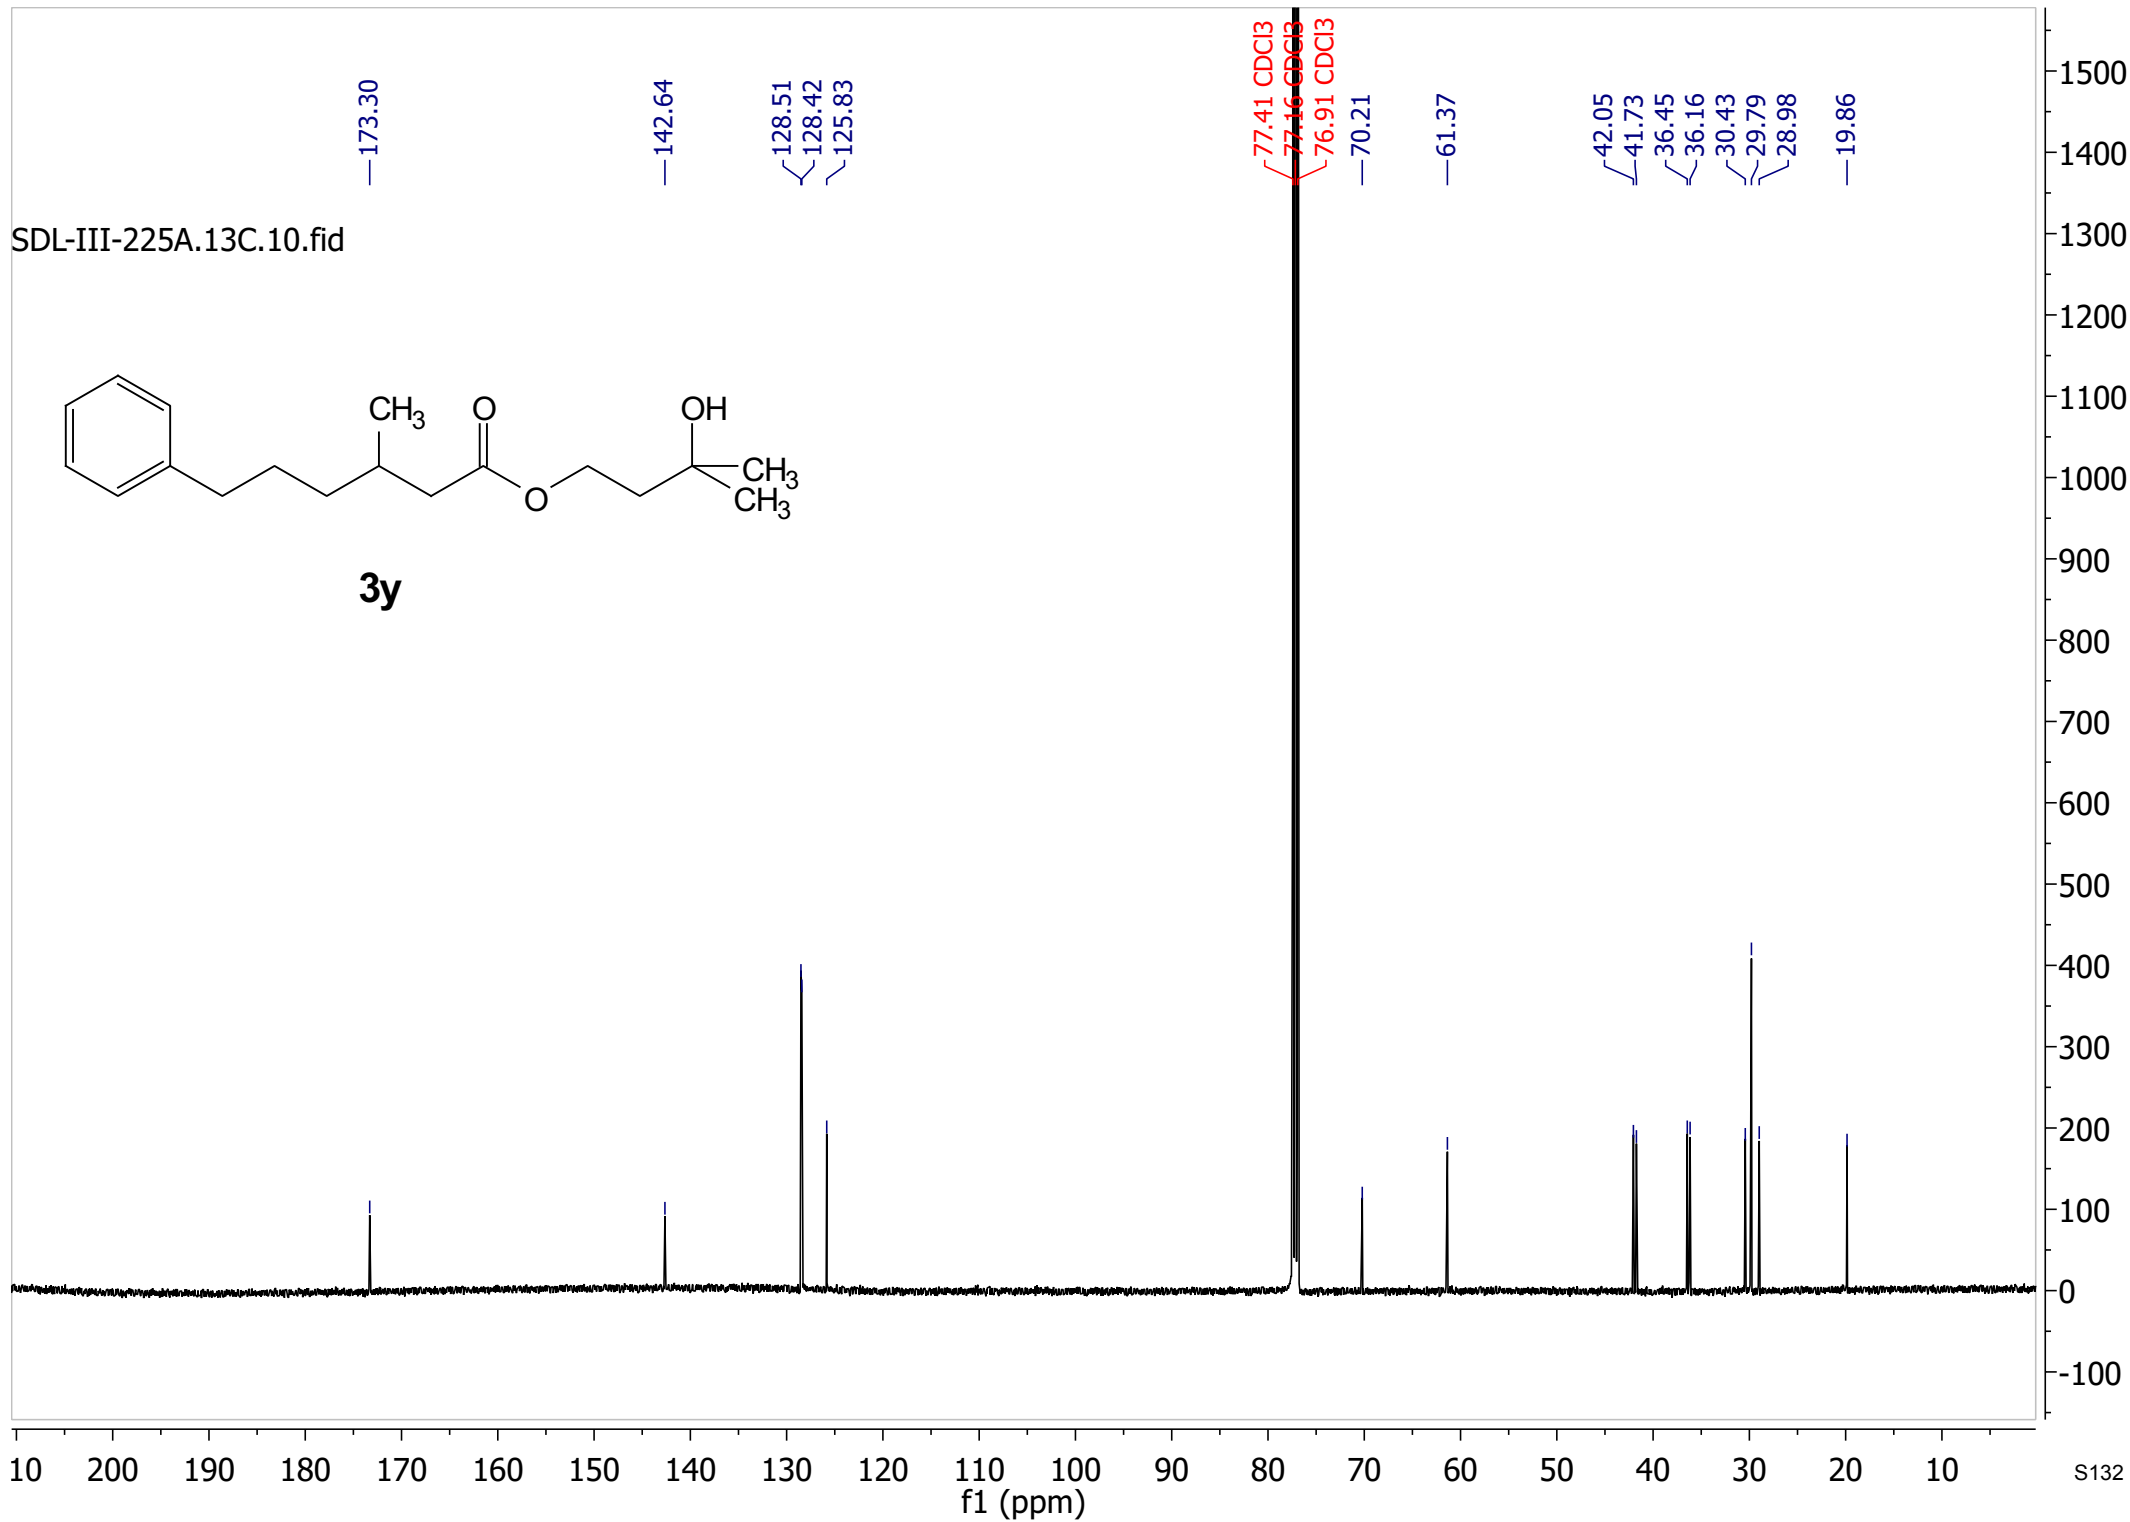

Supplement: c8cc02612b1.pdf [file c8cc02612b1.pdf]
